# Supplementary material
Source: publisher figshare collection journal article supplement (https://springernature.figshare.com/ndownloader/files/15143129)
Supplement: Supplementary file 1 [file 15143129]

data type f2 backcross
109 3978 0
*scaffold1_1001085	h	a	h	h	h	h	a	h	a	h	a	a	-	-	h	a	h	-	h	-	h	h	h	h	h	h	a	a	a	h	a	a	h	h	h	a	h	h	h	a	h	a	h	a	h	h	h	h	a
*scaffold1_1001175	h	a	h	h	h	h	a	h	a	h	a	a	-	-	h	a	h	-	h	-	h	h	h	h	h	h	a	a	a	h	a	a	h	h	h	a	h	h	h	a	h	a	h	a	h	h	h	h	a
*scaffold1_1003927	h	a	h	h	h	h	a	h	a	h	a	a	a	a	h	a	h	a	h	a	h	h	h	h	h	-	a	a	a	h	a	a	h	h	h	a	h	h	h	a	h	a	h	a	-	h	h	h	a
*scaffold1_1343319C	h	a	h	h	h	h	a	h	a	h	a	a	a	a	h	a	h	a	h	a	h	h	h	h	h	h	a	a	a	h	a	a	h	h	h	a	h	h	h	a	h	a	h	a	h	h	h	h	a
*scaffold1_1356030C	h	a	h	-	-	h	a	h	a	h	a	a	a	a	h	a	h	a	h	a	h	-	h	h	h	h	a	a	a	h	a	a	h	h	h	a	h	-	-	a	h	a	h	a	h	h	h	h	a
*scaffold1_1404503C	a	h	a	-	a	a	a	a	h	h	h	a	a	a	a	h	-	a	h	a	a	a	h	h	a	h	a	h	a	h	-	a	h	a	a	h	h	a	a	h	h	h	h	a	h	h	a	a	h
*scaffold1_1404524C	a	h	a	-	a	a	a	a	h	h	h	a	a	a	a	h	-	a	h	a	a	a	h	h	a	h	a	h	a	h	-	a	h	a	a	h	h	a	a	h	h	h	h	a	h	h	a	a	h
*scaffold1_1404544C	a	h	a	-	a	a	a	a	h	h	h	a	a	a	a	h	-	a	h	a	a	a	h	h	a	h	a	h	a	h	-	a	h	a	a	h	h	a	a	h	h	h	h	a	h	h	a	a	h
*scaffold1_1404546C	a	h	a	-	a	a	a	a	h	h	h	a	a	a	a	h	-	a	h	a	a	a	h	h	a	h	a	h	a	h	-	a	h	a	a	h	h	a	a	h	h	h	h	a	h	h	a	a	h
*scaffold1_1404626C	a	h	a	-	a	a	a	a	h	h	h	a	a	a	a	h	a	a	h	a	a	a	h	h	a	h	a	h	a	h	-	a	h	a	a	h	h	a	a	h	h	-	h	a	h	h	a	a	h
*scaffold1_1404635C	a	h	a	-	a	a	a	a	h	h	h	a	a	a	a	h	a	a	h	a	a	a	h	h	a	h	a	h	a	h	-	a	h	a	a	h	h	a	a	h	h	h	h	a	h	h	a	a	h
*scaffold1_1404646C	a	h	a	-	a	a	a	a	h	h	h	a	a	a	a	h	a	a	h	a	a	a	h	h	a	h	a	h	a	h	-	a	h	a	a	h	h	a	a	h	h	h	h	a	h	h	a	a	h
*scaffold1_1404653C	a	h	a	-	a	a	a	a	h	h	h	a	a	a	a	h	a	a	h	a	a	a	h	h	a	h	a	h	a	h	-	a	h	a	a	h	h	a	a	h	h	h	h	a	h	h	a	a	h
*scaffold1_1427339	h	a	h	h	h	h	a	h	a	h	a	a	a	a	h	a	h	a	h	h	h	h	h	h	h	h	a	a	a	h	a	a	h	h	h	a	h	h	h	a	h	a	-	a	h	h	h	h	a
*scaffold1_1427363	h	a	h	h	h	h	a	h	a	h	a	a	a	a	h	a	h	a	h	h	h	h	h	h	h	h	a	a	a	h	a	a	h	h	h	-	h	h	h	a	h	a	-	a	h	h	h	h	a
*scaffold1_1444120C	h	a	h	-	-	h	a	h	a	h	a	a	a	a	h	a	h	a	h	a	h	h	h	h	h	h	a	a	a	h	a	a	h	h	h	a	h	h	h	a	h	a	h	a	h	h	h	h	a
*scaffold1_1493609C	h	a	-	-	h	h	a	h	a	h	a	a	a	a	h	a	h	a	h	a	h	h	h	h	h	h	a	a	a	h	a	a	h	h	h	a	h	h	h	a	h	a	h	a	h	h	h	h	-
*scaffold1_1654705C	h	a	-	-	-	h	a	h	a	h	a	a	a	a	h	a	-	a	h	a	h	-	h	h	h	h	a	a	a	h	a	a	h	h	h	a	h	h	h	a	h	a	h	a	h	h	h	h	a
*scaffold1_1669662	h	a	h	h	h	h	a	h	a	h	a	a	-	a	h	a	h	-	h	h	h	h	h	h	h	h	a	a	a	h	a	a	h	h	h	h	h	h	h	a	h	a	h	a	h	h	h	h	a
*scaffold1_1690303	h	a	h	h	h	h	a	h	a	h	a	a	a	-	h	a	h	a	h	-	h	h	h	h	h	h	a	a	a	h	-	a	h	h	h	a	h	h	h	a	h	a	h	a	h	h	h	h	a
*scaffold1_1690433	h	a	h	h	h	h	a	h	a	h	a	a	a	-	h	a	h	a	h	-	h	h	h	h	h	h	a	a	a	h	-	a	h	h	h	a	h	h	h	a	h	a	h	a	h	h	h	h	a
*scaffold1_1734174	h	a	h	h	h	h	a	h	a	h	a	a	a	a	h	a	h	a	h	-	h	h	h	h	h	h	a	a	a	h	-	a	h	h	h	a	h	h	h	a	h	a	h	a	h	h	h	h	a
*scaffold1_1738199C	h	a	-	h	h	h	a	h	a	h	a	a	a	a	h	a	h	a	h	a	h	h	h	h	h	h	a	a	a	h	a	a	h	h	h	a	h	h	h	a	h	a	h	a	h	h	h	h	a
*scaffold1_1743938	h	a	h	h	h	h	a	h	a	h	-	-	-	-	h	a	h	-	h	-	h	h	h	h	-	h	a	a	a	h	-	a	h	h	h	a	h	h	h	a	h	a	h	a	h	a	h	h	a
*scaffold1_1749646	h	a	h	h	h	h	a	h	a	h	a	a	a	a	h	a	h	a	h	-	h	h	h	h	h	h	a	a	a	h	a	a	h	h	h	a	h	h	h	a	h	a	h	a	h	h	h	h	a
*scaffold1_175096	h	a	h	h	h	h	a	h	a	a	a	a	a	a	h	a	h	-	h	-	h	h	h	h	a	h	a	a	a	h	-	a	h	h	h	a	h	h	h	a	h	a	h	a	h	h	h	h	a
*scaffold1_1754667	h	a	h	h	h	h	a	h	a	h	a	a	a	a	h	a	h	a	h	-	h	h	h	h	h	h	a	a	a	h	a	a	h	h	h	a	h	h	h	a	h	a	h	a	h	h	h	h	a
*scaffold1_1781762	h	a	h	h	h	h	a	h	a	h	a	a	a	a	h	a	h	a	h	-	h	h	h	h	h	h	a	a	a	h	a	a	h	h	h	a	h	h	h	a	h	a	h	a	h	h	h	h	a
*scaffold1_1792554C	h	a	h	-	h	h	a	h	a	h	a	a	a	a	h	a	h	a	h	a	h	-	h	h	h	h	a	-	a	h	a	a	h	h	h	a	h	h	h	a	h	a	h	a	h	h	h	h	a
*scaffold1_1926988	h	a	h	h	h	h	a	h	a	h	a	a	-	a	h	a	h	-	h	-	h	h	h	h	h	h	a	a	a	h	-	a	h	h	h	a	h	h	h	-	-	a	h	a	h	h	h	h	a
*scaffold1_1928028C	h	a	h	-	h	h	a	h	a	h	a	a	a	a	h	a	h	a	h	a	h	-	-	h	h	h	a	a	a	h	a	a	h	h	h	a	h	h	h	a	h	a	h	a	h	h	h	h	a
*scaffold1_1938408	h	a	h	h	h	h	a	h	a	h	a	a	-	a	h	a	h	-	h	-	h	h	h	h	h	h	a	a	a	h	a	a	h	h	h	a	h	h	h	a	h	a	h	a	h	h	h	h	a
*scaffold1_1938486C	h	a	-	-	h	h	a	h	a	h	a	a	a	a	h	a	h	a	-	a	h	-	h	h	h	h	a	a	a	h	a	a	-	h	h	a	h	-	h	a	h	a	h	a	h	h	h	h	a
*scaffold1_1938500	h	a	h	h	h	h	a	h	a	h	a	a	a	-	h	a	h	a	h	-	h	h	h	h	h	h	a	a	a	h	-	a	h	h	h	-	h	h	h	a	h	a	h	a	h	h	h	h	a
*scaffold1_194765C	h	a	h	-	-	h	a	h	a	-	a	a	a	a	-	a	h	a	h	a	h	-	h	h	a	-	a	a	a	h	a	a	h	h	h	a	h	-	h	a	h	a	h	a	h	h	h	h	a
*scaffold1_1950161C	h	-	h	-	h	h	a	h	a	h	a	a	a	a	h	a	h	a	h	a	h	-	h	h	h	h	a	-	a	h	a	a	h	h	h	a	h	-	-	a	h	a	h	a	h	h	h	h	a
*scaffold1_1951248C	h	a	h	-	h	h	a	h	a	h	-	a	a	a	-	a	h	a	h	a	h	-	h	h	h	h	-	a	a	h	-	a	h	h	h	a	h	h	h	a	h	a	h	a	h	h	h	h	a
*scaffold1_1951255C	h	a	h	-	h	h	a	h	a	h	-	a	a	a	-	a	h	a	h	a	h	-	h	h	h	h	-	a	a	h	-	a	h	h	h	a	h	h	h	a	h	a	h	a	h	h	h	h	a
*scaffold1_2182329	h	a	h	h	h	h	a	h	a	h	a	a	-	a	h	a	h	a	h	h	h	h	h	h	h	h	a	a	a	h	a	a	h	h	h	a	h	h	h	a	h	a	h	a	h	h	h	h	a
*scaffold1_2182341C	h	a	h	h	h	h	a	h	a	h	a	a	a	a	-	a	h	a	h	a	h	-	h	h	h	h	a	a	a	h	a	a	h	h	h	a	h	h	h	a	h	a	h	a	h	h	h	h	a
*scaffold1_22406	h	a	h	h	h	h	a	h	a	a	a	a	a	a	h	a	h	a	h	a	h	h	h	h	a	h	a	a	a	h	a	a	h	h	h	a	h	h	h	a	h	a	h	a	h	a	h	h	a
*scaffold1_22572C	h	-	h	h	h	h	a	h	a	a	a	a	a	a	h	a	h	a	h	a	h	h	h	h	a	h	a	a	a	h	a	a	h	h	h	a	h	h	h	a	h	a	h	a	h	a	h	h	a
*scaffold1_22595C	h	-	h	h	h	h	a	h	a	a	a	a	a	a	h	a	h	a	h	a	h	h	h	h	a	h	a	a	a	h	a	a	h	h	h	a	h	h	h	a	h	a	h	a	h	a	h	h	a
*scaffold1_229710C	h	a	h	-	h	h	a	h	a	h	a	a	a	a	h	a	h	a	h	a	h	h	h	h	a	h	a	a	a	h	a	a	h	h	-	a	h	-	-	a	h	a	h	a	h	h	h	h	a
*scaffold1_2388973	h	a	h	h	h	h	a	h	a	h	a	a	a	a	h	a	h	a	h	a	-	h	h	h	h	h	a	a	a	h	a	-	h	h	h	a	h	h	h	a	h	a	h	a	h	h	h	h	a
*scaffold1_2532208C	h	a	h	-	h	h	a	h	a	-	a	a	a	a	h	a	-	a	h	a	h	-	h	h	h	h	a	a	a	h	a	a	h	h	h	a	h	h	-	a	h	a	h	a	h	h	h	h	a
*scaffold1_2614389C	h	a	h	-	h	h	a	h	a	h	a	a	a	a	h	a	h	a	h	a	h	h	-	h	h	h	a	-	a	h	a	a	h	h	h	a	h	h	h	a	h	a	h	a	h	h	h	h	a
*scaffold1_2622554C	h	a	-	-	h	h	a	h	a	-	a	a	a	a	h	a	h	a	h	a	h	-	h	h	h	h	a	a	a	h	a	a	h	h	h	a	h	h	h	a	h	a	h	a	h	h	h	h	a
*scaffold1_2622560	h	a	h	h	h	h	a	h	a	h	a	a	a	a	h	a	h	a	h	-	h	h	h	h	h	h	a	a	a	h	a	a	h	h	h	a	h	h	h	a	h	a	h	a	h	h	h	h	a
*scaffold1_2782264C	h	a	a	-	-	h	a	-	a	h	a	a	a	a	h	a	h	a	h	a	h	-	h	h	h	h	a	a	a	h	a	a	h	h	h	a	h	h	h	a	h	a	h	a	h	h	h	h	a
*scaffold1_2785288C	h	a	a	-	h	h	a	h	a	h	a	a	a	a	h	a	h	a	h	a	h	-	h	h	h	h	a	a	a	h	a	a	h	h	h	a	h	h	h	a	h	a	h	a	h	h	h	h	a
*scaffold1_2785306C	h	a	a	-	h	h	a	-	a	h	a	a	a	a	-	a	-	a	h	a	h	-	h	h	h	h	a	a	a	h	a	a	-	h	h	a	h	-	-	a	h	a	h	a	h	h	h	h	a
*scaffold1_2949731C	h	a	a	a	h	h	a	h	a	h	h	a	a	a	h	a	h	a	h	a	h	-	h	h	h	h	a	a	a	h	a	a	h	h	h	a	h	-	h	a	h	a	h	a	h	h	h	h	a
*scaffold1_2949743	h	a	a	-	h	h	a	h	a	h	h	a	a	a	h	a	h	a	h	-	h	h	h	h	h	h	a	a	a	h	a	a	h	h	h	a	h	h	-	a	h	a	h	a	h	h	h	h	a
*scaffold1_3079471C	h	a	a	a	-	-	a	h	a	h	h	a	a	a	h	a	-	a	h	a	h	-	h	h	h	h	a	a	a	h	a	a	h	h	h	a	h	h	h	a	h	a	h	a	h	h	h	h	a
*scaffold1_3079495	h	a	a	-	h	h	a	h	a	h	h	a	a	-	h	a	h	a	h	-	h	h	h	h	h	h	a	a	a	h	a	-	h	h	h	a	h	h	h	a	h	-	h	a	h	h	h	h	a
*scaffold1_3099145C	h	a	a	a	-	h	a	-	a	-	h	a	a	a	-	a	-	a	h	a	h	-	h	h	h	h	a	a	a	h	a	a	h	h	h	a	h	h	h	a	h	a	h	a	h	h	h	h	a
*scaffold1_3142623	h	a	a	-	h	h	a	h	a	h	h	a	a	a	h	a	h	a	h	-	h	h	h	h	h	h	a	a	a	h	a	a	h	h	h	a	h	h	h	a	h	a	h	a	h	h	h	h	a
*scaffold1_3142769	h	a	a	-	h	h	a	h	a	h	h	a	a	a	h	a	h	a	h	-	h	h	h	h	h	h	a	a	a	h	a	a	h	h	h	a	h	h	h	a	h	-	h	a	h	h	h	h	a
*scaffold1_3167072C	h	a	a	a	h	h	a	h	a	h	h	a	a	a	h	a	h	a	h	a	h	h	h	h	h	h	a	a	a	h	a	a	h	h	h	a	h	h	h	a	h	a	h	a	h	h	h	h	a
*scaffold1_3212913C	h	a	a	a	-	h	a	h	a	h	h	a	a	a	h	a	-	a	h	a	h	h	h	h	h	h	a	a	a	h	a	a	h	h	h	a	h	h	h	a	h	a	h	a	h	h	h	h	a
*scaffold1_3291065C	h	a	a	a	-	h	a	h	a	h	-	a	a	a	h	a	h	a	h	a	h	-	h	h	h	h	a	a	a	h	a	a	h	h	-	a	h	h	h	a	h	a	h	a	h	h	h	h	a
*scaffold1_3313337	h	a	-	-	h	h	a	h	a	h	h	a	a	-	h	a	h	-	h	-	h	h	h	h	h	h	a	a	a	h	-	a	h	h	h	a	h	h	h	a	h	a	h	a	h	h	h	h	a
*scaffold1_3362032C	h	a	a	a	h	h	a	h	a	h	h	a	a	a	h	a	h	a	h	a	h	-	h	h	h	h	a	a	a	h	a	a	h	h	h	a	h	-	h	a	h	a	h	a	h	h	h	h	a
*scaffold1_3362041C	h	a	a	a	h	h	a	h	a	h	h	a	a	a	h	a	h	a	h	a	h	-	h	h	h	h	a	a	a	h	a	a	h	h	h	a	h	-	h	a	h	a	h	a	h	h	h	h	a
*scaffold1_3369225	-	a	a	-	h	h	a	h	a	h	h	a	-	a	h	a	h	a	-	-	h	h	h	h	h	h	a	a	a	h	-	a	h	h	h	a	h	h	h	a	-	a	h	a	h	h	h	h	a
*scaffold1_3369239	-	a	a	-	h	h	a	h	a	h	h	a	a	a	h	a	h	a	-	-	h	h	h	h	h	h	a	a	a	h	-	a	h	h	h	a	h	h	h	a	-	a	h	a	h	h	h	h	a
*scaffold1_3369964C	h	a	a	a	-	h	a	h	a	h	h	a	a	a	-	a	h	a	-	a	h	-	h	h	h	h	a	a	a	h	a	a	h	h	-	a	h	h	h	a	h	a	h	a	h	h	h	h	a
*scaffold1_339916	h	a	h	h	h	h	a	h	a	h	a	a	a	a	h	a	h	a	h	h	h	h	h	h	a	h	a	a	a	h	-	h	h	h	h	a	h	h	h	a	h	a	h	a	h	h	h	h	a
*scaffold1_339926	h	a	h	h	h	h	a	h	a	h	a	a	a	a	h	a	h	a	h	h	h	h	h	h	a	h	a	a	a	h	-	h	h	h	h	a	h	h	h	a	h	a	h	a	h	h	h	h	a
*scaffold1_343094	h	a	h	h	h	h	a	h	a	h	a	a	a	a	h	a	h	a	-	-	h	h	h	h	a	h	a	a	a	h	-	a	h	h	-	a	h	h	h	a	h	a	h	a	h	h	h	h	a
*scaffold1_3551496	h	a	a	-	h	h	a	h	a	h	h	a	a	a	h	a	h	a	h	-	h	h	h	h	h	h	a	a	a	h	-	a	h	h	h	a	h	h	h	a	h	a	h	a	h	h	h	h	a
*scaffold1_3551522	h	a	a	-	h	h	a	h	a	h	h	a	a	a	h	a	h	a	h	-	h	h	h	h	h	h	a	a	a	h	-	a	h	h	h	a	h	h	h	-	h	a	h	a	h	h	h	h	a
*scaffold1_3559371C	h	a	a	a	h	h	a	h	a	h	h	a	a	a	h	a	h	a	h	a	h	h	h	h	h	h	a	a	a	h	a	a	h	h	h	a	h	-	h	a	h	a	h	a	h	h	h	h	a
*scaffold1_3559383C	h	a	a	a	h	h	a	h	a	h	h	a	a	a	h	a	h	a	h	a	h	-	h	h	h	h	a	a	a	h	a	a	h	h	h	a	h	-	h	a	h	a	h	a	h	h	h	h	a
*scaffold1_3559738C	h	a	a	a	h	h	a	h	a	h	h	a	a	a	h	a	h	a	h	a	h	-	h	h	h	h	a	a	a	h	a	a	h	h	-	a	h	h	-	a	h	a	h	a	h	h	h	h	a
*scaffold1_3710925C	h	a	a	a	-	h	a	h	a	h	h	a	a	a	h	a	-	a	h	a	h	h	h	h	h	h	a	a	a	h	a	a	h	h	h	a	h	h	h	a	h	h	h	a	h	h	h	h	a
*scaffold1_3724056C	h	a	a	a	h	h	a	h	a	h	h	a	a	a	h	a	h	a	h	a	h	h	-	h	h	h	a	a	a	h	a	a	h	h	h	a	h	-	h	a	h	h	h	a	h	h	h	h	a
*scaffold1_3779087C	h	a	a	a	h	h	a	h	a	h	h	a	a	a	h	a	h	a	h	a	h	-	h	h	h	h	a	a	a	h	a	a	h	h	h	a	h	-	h	a	h	h	h	a	h	h	h	h	a
*scaffold1_3786723C	h	a	a	a	-	h	a	h	a	h	h	a	a	a	-	a	h	a	h	a	h	-	h	h	h	h	a	a	a	h	a	a	h	h	h	a	h	h	h	a	h	h	h	a	h	h	h	h	a
*scaffold1_3806251C	h	a	a	a	h	h	-	h	a	h	h	a	a	a	h	a	h	a	h	a	h	h	h	h	h	h	a	a	a	h	a	a	h	h	h	a	h	h	h	a	h	h	h	a	h	h	h	h	a
*scaffold1_3888839	h	a	a	-	h	h	a	h	a	h	h	a	a	a	h	a	h	-	h	-	h	h	a	h	h	-	a	a	a	h	-	a	h	h	h	-	h	h	h	a	h	h	h	a	a	h	-	a	a
*scaffold1_3888936C	h	a	a	a	-	-	a	h	a	h	h	a	a	a	-	a	-	a	h	a	h	-	a	h	h	h	a	a	a	h	a	a	h	h	-	a	h	-	h	a	h	-	h	a	a	h	h	a	a
*scaffold1_409711C	h	a	h	-	h	h	a	h	a	h	a	a	a	a	h	a	-	a	h	a	h	-	h	h	a	h	a	a	a	h	a	a	h	h	h	a	h	-	h	a	h	a	h	a	h	h	h	h	a
*scaffold1_4137059	h	a	a	-	h	h	a	h	a	h	h	a	-	a	h	a	h	a	h	-	h	h	a	h	h	h	a	h	a	h	a	a	h	h	h	a	h	h	h	a	h	h	h	a	a	h	h	a	a
*scaffold1_4206414	h	a	a	-	h	-	a	h	a	h	h	a	a	a	h	a	h	a	-	-	h	h	a	h	h	-	a	h	a	h	a	a	h	h	h	a	h	h	h	a	-	h	h	a	a	h	h	a	a
*scaffold1_4206427	h	a	a	-	h	-	a	h	a	h	h	a	a	a	h	a	h	a	h	-	h	h	a	h	h	-	a	h	a	h	a	a	h	h	h	a	h	h	h	a	h	h	h	a	a	h	h	a	a
*scaffold1_4261761C	h	-	a	a	h	h	a	h	a	-	h	a	a	a	h	a	h	a	-	a	h	-	a	h	h	h	a	h	a	h	a	a	h	h	-	a	h	-	-	a	h	h	h	a	a	h	-	a	a
*scaffold1_4363868C	h	a	a	a	h	h	a	h	a	-	-	a	a	a	-	a	h	a	h	a	h	-	a	h	h	h	a	h	a	-	a	a	h	h	h	a	h	h	h	a	h	-	h	a	a	h	h	a	a
*scaffold1_4376305	h	a	a	a	h	h	a	h	a	h	h	a	a	a	h	a	h	a	h	a	h	h	a	h	h	h	a	h	a	h	a	a	h	h	h	a	h	h	h	a	h	h	h	a	a	h	h	a	a
*scaffold1_437895C	h	a	h	-	-	h	a	h	a	-	a	a	a	a	h	a	h	a	h	a	h	-	h	h	a	h	a	a	a	h	a	a	h	h	h	a	h	-	-	a	h	a	h	a	h	h	h	h	a
*scaffold1_4504773C	h	a	a	a	-	h	a	h	a	h	h	a	a	a	-	a	-	a	h	-	h	-	a	h	h	h	a	h	a	h	a	a	h	h	h	a	h	h	h	a	h	h	h	a	a	h	h	a	a
*scaffold1_4504785C	h	a	a	a	-	h	a	h	a	h	h	a	a	a	-	a	-	a	h	-	h	-	a	h	h	h	a	h	a	h	a	a	h	h	h	a	h	h	h	a	h	h	h	a	a	h	h	a	a
*scaffold1_4508792C	h	a	a	a	-	h	a	h	a	h	h	a	a	a	h	a	h	a	h	a	h	-	a	h	h	h	a	h	a	h	a	a	h	h	h	a	h	h	h	a	h	h	h	a	a	h	h	a	a
*scaffold1_4508799C	h	a	a	a	-	h	a	h	a	h	h	a	a	a	h	a	h	a	h	a	h	-	a	h	h	h	a	h	a	h	a	a	h	h	h	a	h	h	h	a	h	h	h	a	a	h	h	a	a
*scaffold1_4634910	h	a	a	-	h	h	a	h	a	h	h	a	a	a	-	a	h	a	h	-	h	h	a	h	h	h	a	h	a	h	-	a	h	h	h	-	h	h	h	a	h	h	h	a	a	h	h	a	h
*scaffold1_4768873C	h	a	a	a	-	h	a	-	a	h	-	a	a	a	a	a	-	a	h	a	h	-	a	h	h	h	a	h	a	h	a	a	h	h	h	a	h	h	h	a	h	h	h	a	a	h	h	a	h
*scaffold1_4845026	h	a	a	a	h	h	a	h	a	h	h	a	a	a	a	a	h	a	h	h	h	h	a	h	h	h	a	h	a	h	a	a	h	h	h	a	h	h	h	a	h	h	h	a	a	h	h	a	h
*scaffold1_5104587C	h	a	a	a	-	h	a	h	a	h	h	a	a	a	a	a	h	a	-	a	h	-	a	h	h	h	a	h	a	h	a	a	h	h	h	a	h	-	h	a	h	-	h	a	a	h	h	a	h
*scaffold1_5202923C	h	a	a	a	-	h	a	h	a	-	h	a	a	a	a	a	h	a	h	a	h	-	a	h	h	h	a	h	a	-	a	a	h	h	h	a	h	-	-	a	h	h	h	a	a	h	h	a	h
*scaffold1_5314926C	h	a	a	a	h	h	a	h	a	-	h	a	a	a	a	a	h	a	a	a	h	-	a	h	h	a	a	h	a	h	a	a	h	h	h	a	a	-	h	a	h	h	h	a	a	h	h	a	h
*scaffold1_5329966	h	a	a	-	h	h	a	h	a	h	h	a	-	a	a	a	h	a	a	-	h	h	-	h	h	a	a	h	a	h	-	a	h	h	h	-	a	h	h	a	h	h	h	a	a	h	h	a	h
*scaffold1_5784088	h	a	a	-	h	h	a	h	a	h	h	a	a	-	a	a	h	a	a	-	h	h	a	h	h	a	a	h	a	h	-	a	h	h	h	-	a	h	h	a	h	h	h	a	a	h	h	a	h
*scaffold1_5867831	h	a	a	-	h	h	a	h	a	h	h	a	a	a	a	a	h	a	a	a	h	h	a	h	h	a	a	h	a	h	a	a	h	h	h	a	a	h	h	a	h	h	h	a	a	h	h	a	h
*scaffold1_6117226	h	a	-	-	h	h	a	h	a	h	h	a	a	a	a	a	h	a	a	-	h	h	a	h	h	a	a	h	a	h	-	a	h	h	h	-	a	h	h	a	h	h	h	a	a	h	h	a	h
*scaffold1_6262550C	h	h	a	a	-	h	a	h	a	h	h	a	a	a	a	a	h	a	a	a	h	-	a	h	h	a	a	h	a	h	a	a	h	h	h	a	a	-	h	a	h	h	h	a	a	h	h	a	h
*scaffold1_6300357C	h	h	a	a	-	h	a	h	a	h	h	a	a	a	a	a	h	a	-	a	h	-	a	h	h	a	a	h	a	h	a	a	h	h	h	-	a	h	h	a	h	h	h	a	a	h	h	a	h
*scaffold1_6409743C	h	h	a	a	h	h	a	h	a	h	h	a	a	a	a	a	h	a	a	a	h	-	a	h	h	a	a	h	a	h	a	a	h	h	h	a	a	h	h	a	h	h	h	a	a	h	h	a	h
*scaffold1_6410092	h	h	a	a	h	h	a	h	a	h	h	a	a	a	a	a	h	a	a	-	h	h	a	h	h	a	a	h	a	h	a	a	h	h	h	a	a	h	h	a	h	h	h	a	a	h	h	a	h
*scaffold1_6410195C	h	h	a	a	h	h	a	h	a	h	h	a	a	a	a	a	h	a	a	a	h	h	a	h	h	a	a	h	a	h	a	a	h	h	h	a	a	h	h	a	h	h	h	a	a	h	h	a	h
*scaffold1_65079C	h	a	h	-	h	h	a	h	a	a	a	a	a	a	h	a	h	a	h	a	h	h	h	h	a	h	a	a	a	h	a	a	h	h	h	a	h	h	h	a	h	a	h	a	h	a	h	h	a
*scaffold1_652188C	h	a	h	-	-	h	a	h	a	-	a	a	a	a	h	a	h	a	h	a	h	-	h	h	h	h	a	a	a	h	a	a	h	h	h	a	h	h	h	a	h	a	h	a	h	h	-	h	a
*scaffold1_6629502C	h	h	a	-	-	h	a	h	a	h	h	a	a	a	a	a	-	a	a	a	h	-	a	h	h	a	a	h	a	h	a	a	h	h	h	a	a	h	-	a	h	h	h	a	a	h	h	a	h
*scaffold1_6872057	h	h	a	-	h	h	a	h	a	h	h	a	a	a	a	a	h	-	a	-	h	h	-	h	h	a	a	h	a	h	-	a	h	h	h	a	a	h	h	a	h	h	h	a	a	h	h	a	h
*scaffold1_7215786C	h	h	a	a	h	h	a	h	a	h	h	a	a	a	a	a	h	a	a	a	h	-	a	h	h	a	a	h	a	h	a	a	h	h	a	a	a	h	h	a	h	h	h	a	a	h	h	a	h
*scaffold1_7312623	h	h	a	-	h	h	a	h	a	h	h	a	a	a	-	a	h	-	a	-	h	h	a	h	h	a	a	h	a	h	-	a	h	h	a	a	a	h	h	a	h	h	h	a	a	h	h	a	h
*scaffold1_7502820C	h	h	a	a	h	h	a	h	a	-	h	a	a	a	a	a	-	a	a	a	h	-	a	h	h	a	a	h	a	h	a	a	h	h	a	a	a	-	-	a	h	-	h	a	a	-	-	a	h
*scaffold1_7695076	h	h	a	-	h	h	a	h	a	h	h	a	a	a	a	a	h	a	a	-	h	h	a	h	h	a	a	h	a	h	a	a	h	h	a	a	a	h	h	a	h	h	h	a	a	h	h	a	h
*scaffold1_851133	h	a	h	h	h	h	a	h	a	h	a	a	a	a	h	a	h	-	h	-	h	h	h	h	h	h	a	a	a	h	a	a	h	h	h	a	h	h	h	a	h	a	h	a	h	h	h	h	a
*scaffold1_982081C	h	a	-	-	-	h	a	h	a	h	a	a	a	a	h	a	h	a	a	a	h	-	h	h	h	h	a	a	a	h	a	a	h	h	h	a	h	h	-	a	-	a	h	a	h	h	h	h	a
*scaffold10_1065712	h	a	h	h	h	h	a	h	a	a	a	h	h	a	h	a	h	-	h	h	h	-	h	h	a	h	a	a	a	h	a	a	h	h	h	-	h	h	h	a	h	a	a	a	h	a	h	h	a
*scaffold10_1065714	h	a	h	h	h	h	a	h	a	a	a	h	h	a	h	a	h	-	h	h	h	-	h	h	a	h	a	a	a	h	a	a	h	h	h	-	h	h	h	a	h	a	a	a	h	a	h	h	a
*scaffold10_1086813C	h	a	h	-	h	h	a	h	a	a	a	h	h	a	h	a	h	a	h	a	h	a	h	h	a	h	a	a	a	h	a	a	h	h	h	a	h	h	h	a	-	a	a	a	h	a	h	h	a
*scaffold10_1163039	h	a	h	h	h	h	a	h	a	a	a	h	h	a	h	a	h	a	h	-	h	-	h	h	a	h	a	a	a	h	a	h	h	h	h	a	h	h	h	a	h	a	a	a	h	a	h	h	a
*scaffold10_1163045	h	a	h	h	h	h	a	h	a	a	a	h	h	a	h	a	h	a	h	-	h	-	h	h	a	h	a	a	a	h	a	a	h	h	h	a	h	h	h	a	h	a	a	a	h	a	h	h	a
*scaffold10_1163049C	h	a	h	h	h	h	a	h	a	a	a	h	h	a	h	a	h	a	h	a	h	a	h	h	a	h	a	a	a	h	a	a	h	h	h	a	h	h	h	a	h	a	a	a	h	a	h	h	a
*scaffold10_1166887C	h	a	h	-	h	h	a	h	a	a	a	h	h	a	h	a	h	a	h	a	h	a	h	h	a	h	a	a	a	-	a	a	-	h	-	a	h	h	-	a	h	a	a	a	h	a	h	h	a
*scaffold10_13578C	h	a	h	-	-	h	a	h	a	a	a	a	a	a	h	a	h	a	h	a	h	h	h	h	a	h	a	a	a	h	a	a	h	h	h	a	h	h	h	a	h	a	h	a	h	a	h	h	a
*scaffold10_141739C	h	a	h	-	h	h	a	h	a	a	a	a	a	a	h	a	h	a	h	a	h	a	h	h	a	h	a	a	a	h	a	a	h	h	h	a	h	h	h	-	h	a	h	a	h	a	h	h	a
*scaffold10_141835	h	a	h	h	h	h	a	h	a	a	a	a	a	-	h	a	h	a	h	-	h	-	h	h	a	h	a	a	a	h	-	h	h	h	h	a	h	h	h	a	h	a	h	a	h	a	h	h	a
*scaffold10_141949C	h	a	-	-	h	h	a	h	a	a	a	a	a	a	h	a	h	a	h	a	h	a	h	h	a	h	a	a	a	-	a	a	h	h	h	a	h	-	h	a	h	a	h	a	h	a	h	h	a
*scaffold10_1425856	h	a	h	h	h	h	a	h	a	-	a	h	h	-	h	a	h	-	h	-	h	-	h	h	a	h	a	a	a	h	-	a	h	h	h	-	h	h	h	-	h	a	a	a	h	a	h	h	a
*scaffold10_1763688	h	a	h	h	h	h	a	h	a	-	a	h	h	a	h	a	h	a	-	-	h	-	h	h	a	h	a	a	a	h	-	a	h	h	h	a	h	h	h	a	h	a	a	a	h	a	h	h	a
*scaffold10_1763716C	h	a	-	-	h	h	a	h	a	a	a	h	-	a	h	a	h	a	h	a	h	a	h	h	a	h	a	a	a	h	a	a	h	h	h	a	h	h	h	a	h	a	a	a	h	a	h	h	a
*scaffold10_1827753	h	a	h	h	h	h	-	h	a	-	a	h	h	-	h	a	h	-	h	-	h	a	h	h	a	h	a	a	a	h	-	a	h	h	h	a	h	h	h	a	h	a	a	a	h	a	h	h	a
*scaffold10_1827891C	h	a	h	-	h	h	a	h	a	a	a	h	h	a	-	a	h	a	h	a	h	a	h	h	a	h	a	a	a	h	a	a	h	h	h	a	h	-	h	a	h	a	a	a	h	a	h	h	a
*scaffold10_1827902	h	a	h	h	h	h	a	h	a	a	a	h	h	a	h	a	h	a	h	h	h	-	h	h	a	h	a	a	a	h	-	a	h	h	h	a	h	h	h	a	h	a	a	a	h	a	h	h	a
*scaffold10_1827923C	h	a	h	-	h	h	a	h	a	a	a	h	h	a	-	a	h	a	h	a	h	a	h	h	a	h	a	a	a	h	a	a	h	h	h	a	h	-	h	a	h	a	a	a	h	a	h	h	a
*scaffold10_2076257C	h	-	h	h	h	h	a	h	a	a	a	h	-	a	h	a	h	h	h	a	h	a	h	h	a	h	a	a	a	h	a	a	h	h	h	a	h	h	h	a	h	a	a	a	h	-	h	h	a
*scaffold10_2185198C	h	a	h	-	-	h	a	h	a	a	a	h	h	a	-	a	-	h	h	a	h	a	h	h	a	h	a	a	a	h	a	a	h	h	h	a	h	-	-	a	h	a	a	a	h	a	h	h	a
*scaffold10_2282127C	h	a	h	-	-	h	-	h	a	a	a	h	h	a	-	a	-	-	h	a	h	a	h	h	a	h	a	a	a	h	a	a	h	h	-	a	h	-	h	a	h	a	a	a	h	a	h	h	a
*scaffold10_2282226	h	a	h	h	h	h	a	h	a	a	a	h	h	a	h	a	h	h	h	-	h	-	h	h	a	h	a	a	a	h	-	a	h	h	h	a	h	h	h	a	h	a	a	a	h	a	h	h	a
*scaffold10_2368530	h	a	h	h	h	h	a	h	a	a	a	h	h	a	h	a	h	h	h	-	h	a	h	h	a	h	a	a	a	h	-	a	h	h	h	a	h	h	h	a	h	a	a	a	h	a	h	h	a
*scaffold10_2454161C	h	a	h	-	h	h	a	h	a	a	a	h	-	a	-	a	h	h	h	a	h	a	h	h	a	h	a	a	a	h	a	a	h	h	h	a	h	-	h	a	h	a	a	a	h	a	h	h	a
*scaffold10_412635	h	a	h	h	h	h	a	h	a	a	a	a	a	a	h	a	h	-	h	h	h	a	h	h	a	h	a	a	a	h	-	-	h	h	h	-	h	h	h	a	h	a	h	a	h	a	h	h	a
*scaffold10_445255	h	a	h	h	h	h	a	h	a	a	a	a	a	a	h	a	h	a	h	-	h	a	-	h	a	h	a	a	a	h	a	a	-	h	h	a	h	h	h	a	h	a	h	a	h	a	h	h	a
*scaffold10_649705	h	a	h	h	h	h	a	h	a	a	a	a	a	a	h	a	h	a	h	h	h	a	h	h	a	h	-	a	a	h	-	a	h	h	h	a	h	h	h	a	h	-	h	a	h	a	h	h	a
*scaffold10_649731	h	a	h	h	h	h	a	h	a	a	a	a	a	a	h	a	h	a	h	h	h	a	h	h	a	h	-	a	a	h	-	a	h	h	h	a	h	h	h	a	h	h	h	a	h	a	h	h	a
*scaffold10_667813C	h	a	-	-	-	h	a	h	a	a	a	a	a	a	-	a	h	a	h	a	h	a	h	h	a	h	a	a	a	h	a	a	h	-	h	a	h	-	h	a	h	a	h	a	h	a	h	h	a
*scaffold10_680813	h	a	h	h	h	h	a	h	a	a	a	a	-	-	h	a	h	-	h	h	h	-	h	h	a	h	a	a	a	h	-	a	h	h	h	a	h	h	h	a	h	a	h	a	h	a	h	h	a
*scaffold10_680852	h	a	h	h	h	h	a	h	a	a	a	a	-	-	h	a	h	-	h	h	h	-	h	h	a	h	a	a	a	h	-	a	h	h	h	a	h	h	h	a	h	a	h	a	h	a	h	h	a
*scaffold10_690469	h	a	h	h	h	-	a	h	a	a	a	a	a	a	h	a	h	a	h	-	-	a	h	h	a	h	a	a	a	h	a	h	h	h	h	a	h	h	h	a	h	a	h	a	h	a	h	h	a
*scaffold10_701195C	h	a	h	h	h	h	a	h	a	a	a	a	a	a	h	a	h	a	-	a	h	a	h	h	a	h	a	a	a	h	a	a	h	h	-	a	h	-	-	a	h	a	-	a	h	a	h	h	a
*scaffold10_768723C	h	a	h	-	h	h	a	h	a	a	a	a	a	a	h	a	h	a	h	a	h	a	h	h	a	h	a	a	a	-	a	a	h	h	h	a	h	h	h	a	h	a	a	a	h	a	h	h	a
*scaffold10_861336C	h	a	h	h	h	h	a	h	a	a	a	a	a	a	h	a	h	a	h	a	h	a	h	h	a	h	a	a	a	h	a	a	h	h	-	a	h	h	h	a	h	a	a	a	h	a	h	h	a
*scaffold10_861343C	h	a	h	h	h	h	a	h	a	a	a	a	a	a	h	a	h	a	h	a	h	a	h	h	a	h	a	a	a	h	a	a	h	h	-	a	h	h	h	a	h	a	a	a	h	a	h	h	a
*scaffold10_861463	h	a	h	h	h	-	a	h	a	a	a	a	a	a	h	a	h	a	-	h	h	-	h	h	a	h	a	a	a	h	a	a	-	h	h	a	h	h	h	a	h	a	a	a	h	a	-	h	a
*scaffold10_861495	h	a	h	h	h	-	a	h	a	a	a	a	a	a	h	a	h	a	-	h	h	-	h	h	a	h	a	a	a	h	a	a	-	h	h	a	h	h	h	a	h	a	a	a	h	a	-	h	a
*scaffold10_875941	h	a	h	h	h	h	a	h	a	a	a	a	a	-	h	a	h	-	h	-	h	-	h	h	a	h	a	a	a	h	-	a	h	h	h	-	h	h	h	a	h	-	a	a	h	a	h	h	a
*scaffold100_281162C	a	a	h	a	a	h	h	a	h	a	a	a	a	a	a	h	a	a	a	-	h	-	a	h	h	h	-	h	h	-	h	a	h	h	-	a	a	a	a	a	a	a	h	h	h	a	a	a	h
*scaffold100_457683	a	a	h	a	a	h	-	a	h	a	a	a	a	a	a	h	a	a	a	h	h	h	a	h	h	h	h	h	h	h	h	a	h	h	h	a	a	a	a	a	a	a	h	h	h	a	a	a	h
*scaffold100_549576C	a	a	-	a	a	h	h	a	h	a	-	a	a	a	a	h	a	a	a	-	h	-	a	h	h	h	-	h	h	h	-	a	h	h	h	a	a	a	a	a	a	a	h	h	h	a	a	a	h
*scaffold101_300551	h	a	a	a	a	a	h	h	h	-	a	a	a	h	h	h	h	h	h	h	a	-	h	a	h	a	h	h	a	-	h	a	a	h	a	a	h	-	h	h	a	a	a	h	h	a	h	h	a
*scaffold101_355154C	h	a	a	a	a	a	h	h	h	a	a	a	a	h	h	h	h	h	h	-	a	a	-	a	h	a	h	h	a	a	h	a	a	h	a	a	h	-	-	h	a	a	a	h	h	a	h	h	a
*scaffold101_766959C	h	a	a	a	a	a	h	h	h	a	a	a	a	h	h	h	h	h	h	a	a	a	h	a	h	a	-	h	h	a	-	a	a	h	a	a	h	a	h	h	a	a	a	h	h	a	h	h	a
*scaffold102_131545C	a	a	a	-	h	h	a	h	a	a	a	a	a	h	a	a	-	a	a	a	-	-	h	a	a	h	a	a	a	h	a	a	h	a	h	h	a	a	a	h	a	a	a	a	h	h	a	-	h
*scaffold102_171135C	a	a	a	-	-	h	a	h	a	a	a	a	a	h	a	a	-	a	a	a	-	-	h	a	a	h	a	a	a	h	a	a	h	a	h	h	a	a	a	h	a	a	a	a	h	h	a	a	h
*scaffold102_294159	a	a	-	h	h	h	a	h	a	a	a	a	-	h	-	a	h	a	a	-	h	h	h	a	a	h	-	a	a	h	-	a	h	a	-	h	a	a	a	h	a	a	-	a	h	h	a	-	h
*scaffold102_373277C	a	a	a	-	h	h	a	h	a	a	a	a	a	h	a	a	h	a	a	a	h	-	h	a	a	h	a	a	a	-	a	a	h	a	h	h	a	-	a	h	a	a	a	a	h	h	a	a	h
*scaffold102_474548C	a	a	a	h	h	h	a	h	a	a	a	a	a	h	a	a	h	a	a	a	h	h	h	a	a	h	a	a	a	h	a	a	h	a	h	h	a	a	a	h	a	a	a	a	h	h	a	a	h
*scaffold103_359607C	a	h	a	h	a	h	h	h	a	h	h	a	a	a	a	h	h	a	a	a	a	h	h	h	a	h	h	a	h	a	h	a	a	h	a	a	a	a	h	h	a	h	h	a	a	a	a	a	h
*scaffold103_359688C	a	h	a	h	a	h	h	h	a	h	h	a	a	a	a	h	h	a	a	a	a	h	h	h	a	h	h	a	h	a	h	a	a	h	a	a	a	a	h	h	a	h	h	a	a	a	a	a	h
*scaffold103_405874	a	h	a	h	-	h	h	h	a	h	h	a	-	a	-	h	h	-	a	-	a	h	h	h	a	h	h	a	h	-	h	a	a	h	a	a	a	-	h	h	a	h	h	a	a	a	a	a	h
*scaffold103_405884	a	h	a	h	-	h	h	h	a	h	h	a	-	a	-	h	h	-	a	-	a	h	h	h	a	h	h	a	h	-	h	a	a	h	a	a	a	-	h	h	a	h	h	a	a	a	a	a	h
*scaffold103_563247	a	h	a	h	a	h	h	h	a	h	h	a	a	a	a	h	h	a	a	-	a	h	h	h	-	h	h	a	h	a	h	-	a	h	a	-	a	a	h	h	a	h	h	a	a	a	a	a	h
*scaffold104_494685C	a	h	a	a	h	a	h	a	h	h	h	a	a	a	a	a	a	a	a	h	h	a	a	h	a	h	h	h	h	a	a	a	a	a	h	h	a	-	h	a	h	a	a	a	h	a	h	h	a
*scaffold104_494861	a	h	a	a	h	a	h	a	h	h	h	a	a	a	a	a	a	a	-	h	h	a	a	h	a	h	h	h	h	a	a	a	-	a	h	h	a	h	h	a	h	a	a	a	h	a	h	h	a
*scaffold104_496510	a	h	a	-	h	a	h	a	h	h	h	a	a	a	a	a	a	a	a	h	h	-	a	h	a	h	h	h	h	a	-	a	a	a	h	h	a	h	h	a	h	a	a	a	h	a	h	h	a
*scaffold104_756307C	a	h	a	a	-	a	h	a	h	h	h	a	a	a	a	a	a	a	a	-	h	a	a	h	a	h	h	h	h	a	a	a	a	a	-	h	a	-	h	a	h	a	a	a	h	a	h	h	a
*scaffold104_87343	a	h	a	a	h	a	h	a	h	h	h	a	a	a	a	a	a	a	-	h	h	-	a	h	a	h	h	h	h	a	-	a	a	a	h	h	a	h	h	a	h	a	a	a	h	a	h	h	a
*scaffold105_489721	a	h	a	-	h	h	h	a	a	h	a	a	a	-	a	a	a	a	h	h	h	h	h	a	a	h	a	-	a	h	-	a	h	a	a	a	h	a	a	a	h	h	h	a	a	h	h	a	a
*scaffold105_489787	a	h	a	-	h	h	h	a	a	h	a	a	a	-	a	a	a	a	h	h	h	h	h	a	a	h	a	-	a	h	-	a	h	a	a	a	h	a	a	a	h	h	h	a	a	h	h	a	a
*scaffold107_343863	a	h	a	a	h	h	h	a	a	h	a	a	a	a	a	a	a	a	h	-	h	h	h	a	a	h	a	a	a	h	a	a	h	h	a	h	h	a	a	h	h	h	h	a	a	h	h	h	a
*scaffold107_343949	a	h	a	a	h	h	h	a	a	h	a	a	a	a	a	a	a	a	h	-	h	h	h	a	a	h	a	a	a	h	a	a	-	h	a	h	h	a	a	h	h	h	h	a	a	h	h	h	a
*scaffold107_344348C	h	a	a	a	a	a	a	a	a	a	a	h	h	h	a	a	a	a	h	-	h	a	h	h	a	a	a	h	a	a	-	-	h	h	a	h	h	a	h	h	a	-	a	a	a	a	a	h	a
*scaffold107_709615C	h	a	a	a	a	a	a	a	a	a	a	h	h	h	a	a	a	a	h	-	h	a	h	h	a	a	a	h	a	a	-	h	h	a	a	h	h	a	-	h	a	h	a	a	a	a	a	h	a
*scaffold107_755248C	h	a	a	a	a	a	a	a	a	a	a	h	h	h	a	a	a	a	h	-	h	a	h	h	a	a	a	h	a	a	-	h	h	a	a	h	h	a	h	h	a	h	a	a	a	a	a	h	a
*scaffold108_720288C	h	a	h	h	h	h	a	h	a	a	a	h	h	a	h	a	h	h	h	a	h	a	h	h	a	h	h	a	a	h	a	a	h	h	h	a	h	a	h	a	h	a	a	a	h	a	h	h	a
*scaffold108_793394C	h	a	h	-	-	h	a	h	a	a	a	h	h	a	h	a	h	-	h	a	h	a	h	h	a	h	h	a	a	h	a	a	h	h	h	a	h	a	h	a	h	a	a	a	h	a	h	h	a
*scaffold108_91646C	h	a	a	-	a	a	h	h	a	h	h	a	a	a	a	a	h	-	h	a	a	a	h	h	h	h	h	a	h	h	a	h	a	h	h	a	h	a	a	h	a	h	h	h	a	a	h	h	a
*scaffold108_91647C	h	a	a	-	a	a	h	h	a	h	h	a	a	a	a	a	h	-	h	a	a	a	h	h	h	h	h	a	h	h	a	h	a	h	h	a	h	a	a	h	a	h	h	h	a	a	h	h	a
*scaffold108_91658	h	a	-	h	-	a	h	h	a	h	h	a	a	a	-	a	h	h	h	-	a	-	h	h	h	h	h	a	h	h	-	h	a	h	h	a	h	-	-	h	a	h	h	h	a	a	h	h	a
*scaffold108_950031	h	a	h	h	h	h	a	h	a	a	-	h	h	-	h	a	h	h	h	-	h	-	h	h	a	h	h	a	a	h	-	a	h	h	h	a	h	h	h	a	h	a	a	a	h	a	h	h	a
*scaffold109_247662C	a	a	-	a	a	a	h	a	h	a	a	a	a	a	a	h	a	-	a	-	h	-	a	h	h	h	h	h	h	h	-	a	h	h	h	a	a	a	a	a	a	a	h	h	h	a	a	a	h
*scaffold109_449205C	a	a	h	a	a	a	h	a	h	a	a	a	a	a	a	h	a	-	a	-	h	-	a	h	h	h	h	h	h	h	-	a	h	h	h	a	a	a	a	a	a	a	h	h	h	-	a	-	h
*scaffold109_540418C	a	a	h	a	a	h	h	a	h	a	a	a	a	a	a	h	a	-	a	-	h	-	a	h	h	h	-	h	h	h	-	a	h	h	-	a	a	a	a	a	a	a	h	h	h	a	a	a	h
*scaffold11_1641499	a	h	-	-	a	a	a	a	h	h	h	a	-	a	-	a	-	-	a	h	a	-	a	h	h	h	a	a	h	a	a	a	a	a	h	a	a	h	h	a	a	a	h	a	h	a	h	a	a
*scaffold11_2513602	a	h	a	-	a	a	a	a	h	h	h	a	a	a	a	a	a	a	a	h	a	-	a	h	h	h	a	a	h	-	-	a	a	a	h	a	a	h	h	a	a	a	h	h	h	a	h	a	a
*scaffold11_651335	a	h	-	-	a	a	a	a	h	h	h	a	a	a	a	a	a	a	a	h	a	-	a	h	h	h	a	a	h	-	-	a	a	a	h	a	a	h	h	a	h	a	h	a	h	a	h	a	a
*scaffold110_1038938C	a	a	a	h	a	a	h	a	a	a	h	a	a	h	a	h	h	h	h	-	a	a	a	a	a	h	h	h	a	a	-	a	h	a	h	-	h	a	-	h	a	h	-	a	h	h	a	h	a
*scaffold110_105554C	a	a	a	-	a	a	-	a	a	a	h	a	a	-	a	h	-	-	h	a	a	a	a	a	a	h	h	h	a	a	a	a	h	a	h	h	h	a	h	h	a	h	h	a	h	h	a	a	a
*scaffold110_951572C	a	h	a	a	a	a	h	h	a	a	h	a	a	a	h	h	h	a	h	-	h	a	a	h	h	a	h	h	h	h	h	a	a	a	h	a	a	a	h	h	a	a	h	h	h	h	a	a	a
*scaffold110_951592C	a	h	a	-	h	a	a	a	h	h	h	a	a	a	h	a	a	a	a	-	a	a	a	h	a	h	h	h	h	a	a	-	-	a	h	h	-	h	h	a	h	a	a	-	h	a	h	h	a
*scaffold110_965312C	a	a	a	h	a	a	h	a	a	a	a	h	h	a	h	h	a	a	a	a	h	a	h	h	a	a	h	a	a	a	a	h	a	a	h	a	a	h	a	h	h	a	a	a	h	h	h	a	a
*scaffold111_143940	h	h	a	h	-	h	h	a	a	h	h	a	a	-	-	h	h	-	a	-	a	h	h	h	a	h	h	a	h	a	h	a	a	h	a	a	a	a	h	h	a	a	h	a	a	a	a	-	-
*scaffold111_214610	h	h	a	h	a	h	h	a	a	h	h	a	a	a	a	h	h	a	a	a	a	h	h	h	a	h	h	a	h	a	h	a	a	h	a	a	a	a	h	h	a	-	h	a	a	a	a	a	h
*scaffold111_30430	h	a	h	a	a	a	a	a	h	h	a	a	a	a	h	a	a	a	h	h	a	a	a	a	a	a	h	h	h	-	-	h	a	h	h	h	h	a	-	a	a	h	h	h	h	h	a	h	h
*scaffold111_531267C	h	h	a	h	a	h	h	a	a	h	h	a	a	a	a	h	h	a	a	a	a	h	h	h	a	h	h	a	h	a	h	a	a	h	a	a	a	a	h	h	a	a	h	a	a	a	a	a	h
*scaffold111_551545C	h	h	a	h	a	h	h	a	a	h	h	a	a	a	a	h	h	a	a	a	a	-	h	h	a	h	h	a	h	a	-	a	a	h	a	a	a	a	-	h	a	a	h	a	a	a	a	a	h
*scaffold111_605582C	h	h	a	h	a	h	h	a	a	h	h	a	a	a	a	h	h	a	a	a	a	-	h	h	a	h	h	a	h	a	h	a	a	h	a	a	a	a	h	h	a	a	h	a	a	a	a	a	h
*scaffold111_608985C	h	h	-	-	-	h	h	a	a	h	h	a	a	a	a	h	-	a	a	-	a	-	h	h	a	h	h	a	h	a	h	a	a	h	a	a	a	a	h	h	a	a	h	a	a	a	a	a	h
*scaffold111_791077	h	h	a	h	a	h	h	a	a	h	h	a	a	a	a	h	h	a	a	-	a	h	h	h	a	h	h	a	h	-	h	a	a	h	a	a	a	-	h	h	a	-	h	a	a	a	a	a	h
*scaffold111_800306C	h	h	a	-	a	h	h	a	a	h	h	a	a	a	a	h	-	a	a	a	a	-	h	h	a	h	h	a	h	a	h	a	a	h	a	a	a	a	-	h	a	a	h	a	a	a	a	a	h
*scaffold112_1021741	a	a	a	h	a	a	h	a	a	a	h	a	a	h	h	h	h	a	h	h	a	a	a	h	a	h	h	h	a	a	a	-	h	a	h	h	h	a	h	a	a	a	h	a	h	h	a	a	a
*scaffold112_440817	a	a	a	h	a	a	h	a	a	a	h	a	a	h	a	h	h	a	h	h	a	a	a	h	a	h	h	h	a	a	-	a	h	a	h	h	h	-	h	a	a	a	h	a	h	h	a	a	a
*scaffold112_566768C	a	a	h	a	h	h	a	a	h	h	h	a	a	a	a	a	a	-	a	h	h	h	h	a	a	a	a	h	a	h	-	a	a	h	h	a	a	-	h	a	h	h	h	h	h	h	h	a	h
*scaffold114_1000687C	a	h	h	h	a	a	a	a	a	h	a	h	h	h	h	h	h	h	a	a	a	-	h	h	h	h	-	a	h	a	-	h	h	a	a	a	a	-	a	h	a	h	a	h	a	a	-	h	a
*scaffold114_419987	a	h	h	h	a	a	a	a	a	h	a	h	h	h	h	h	h	h	a	-	a	h	h	h	h	h	h	a	h	a	h	h	h	a	a	a	a	h	a	h	a	h	a	h	a	a	h	h	a
*scaffold114_879428	a	h	h	h	a	a	a	a	a	h	a	h	h	h	h	h	h	h	a	-	a	h	h	h	h	h	h	a	h	a	h	h	h	a	a	a	a	h	a	h	a	h	a	h	a	a	h	h	a
*scaffold114_880152	a	h	h	h	a	a	a	a	a	h	a	h	h	h	h	h	h	h	a	-	a	h	h	h	h	h	h	a	h	a	h	h	h	a	-	a	a	h	a	h	a	h	a	h	a	a	h	h	a
*scaffold114_990086	a	h	h	h	a	a	a	a	a	h	a	h	h	h	h	h	h	h	a	-	a	h	h	h	h	h	h	a	h	a	h	h	h	a	a	a	a	h	a	h	a	h	a	h	a	a	h	h	a
*scaffold114_990096C	a	h	-	h	a	a	a	a	a	h	a	h	h	h	h	h	h	h	a	a	a	-	h	h	h	h	h	a	h	a	h	h	h	a	a	a	a	h	a	h	a	h	a	h	a	a	h	h	a
*scaffold115_194702	h	a	h	-	-	a	a	a	h	h	a	a	a	a	h	a	-	-	h	-	h	a	a	a	a	a	h	h	h	h	h	h	a	h	h	h	h	-	h	a	a	h	h	h	h	h	a	h	h
*scaffold115_280588C	h	a	-	a	a	a	a	a	h	h	a	a	a	a	h	a	a	a	h	-	h	a	a	a	a	a	h	h	h	h	-	h	a	h	h	h	h	a	-	a	a	h	h	h	h	h	a	h	h
*scaffold115_280593C	h	a	-	a	a	a	a	a	h	h	a	a	a	a	-	a	a	a	h	-	h	a	a	a	a	a	h	h	h	h	-	h	a	h	h	h	h	a	-	a	a	h	h	h	h	h	a	h	h
*scaffold115_423414	h	a	h	-	h	a	a	a	h	h	a	a	-	-	h	a	a	-	h	h	h	-	a	a	a	a	h	h	h	h	h	h	a	h	h	h	h	a	h	a	a	h	h	h	h	h	a	h	h
*scaffold115_685085C	h	a	h	a	h	a	a	a	h	-	a	a	a	a	h	a	a	a	h	-	h	a	a	a	a	a	h	h	h	h	-	h	a	h	h	-	h	a	h	a	a	h	h	h	h	h	a	h	h
*scaffold115_951315C	h	a	h	a	h	a	a	a	h	h	a	a	a	a	h	a	a	a	h	-	h	a	a	a	a	a	h	h	h	h	h	h	a	h	h	-	h	a	h	a	a	-	h	h	h	h	a	h	h
*scaffold115_951429	h	a	h	a	h	a	a	a	h	h	a	a	a	a	h	a	a	-	h	h	h	-	a	a	a	a	h	h	h	h	h	h	a	h	h	h	h	a	h	a	a	h	h	h	h	h	a	h	h
*scaffold115_95576C	h	a	h	a	a	a	a	a	h	h	a	a	a	a	h	a	a	a	h	-	h	a	a	a	a	a	h	h	h	h	-	h	a	h	h	h	h	a	h	a	a	h	h	h	h	h	a	h	h
*scaffold115_95582C	h	a	h	a	a	a	a	a	h	h	a	a	a	a	h	a	a	a	h	-	h	a	a	a	a	a	h	h	h	h	-	h	a	h	h	h	h	a	h	a	a	h	h	h	h	h	a	h	h
*scaffold116_810690	a	a	a	h	a	a	h	a	a	a	h	a	a	h	h	h	h	a	h	h	a	-	h	h	h	h	h	a	a	a	a	a	h	a	h	h	h	a	h	a	a	a	h	a	h	h	a	a	a
*scaffold119_933631	a	h	h	h	h	a	a	a	h	h	h	a	a	h	h	a	a	-	h	-	h	h	h	h	a	a	a	h	h	a	-	a	a	a	h	a	h	h	-	a	h	a	h	h	h	h	h	h	h
*scaffold119_947729C	a	h	h	-	h	a	a	a	h	h	h	a	a	h	h	a	a	a	h	a	h	h	h	h	a	a	a	h	h	a	a	a	a	a	h	a	h	h	a	a	h	a	h	h	h	h	h	h	h
*scaffold12_1202335	a	h	a	h	h	h	h	h	a	a	a	a	a	h	h	a	h	h	a	-	a	h	h	a	a	a	h	a	h	h	a	h	a	a	h	a	a	a	a	h	a	a	h	h	a	h	h	-	a
*scaffold12_1202492	a	h	a	h	h	h	h	h	a	a	a	a	a	h	h	a	h	h	a	-	a	h	h	a	a	a	h	a	h	h	a	h	a	a	h	a	a	a	a	h	a	a	h	h	a	h	h	h	a
*scaffold12_1422949	a	h	-	h	h	h	h	h	a	a	a	a	a	h	h	a	h	h	a	-	a	h	h	a	a	a	h	a	h	h	-	-	a	a	h	a	a	-	-	h	a	a	h	h	a	h	h	h	a
*scaffold12_1486151C	a	h	a	h	h	h	h	h	a	a	a	a	a	h	h	-	h	h	a	a	a	-	h	a	a	-	h	-	h	h	a	h	a	a	h	a	a	a	a	h	a	a	h	h	a	h	h	h	a
*scaffold12_1486290C	a	h	a	h	h	h	h	h	a	a	a	a	a	h	h	a	h	h	a	a	a	-	h	a	a	a	h	a	h	h	a	h	a	a	h	a	a	a	a	h	a	a	h	h	a	h	h	h	a
*scaffold12_1526655	a	h	-	h	h	h	h	h	a	a	a	a	a	h	h	a	h	h	a	-	a	h	h	a	-	a	h	a	h	h	-	h	a	a	h	a	a	-	-	h	a	a	h	h	a	h	h	h	a
*scaffold12_1645451	a	h	-	h	h	h	h	h	a	-	a	a	a	h	h	a	h	-	a	-	a	h	h	a	a	a	h	a	h	h	-	a	a	a	h	-	a	-	-	h	a	a	h	h	a	h	h	h	a
*scaffold12_1647080	a	h	-	h	h	h	h	h	a	a	-	a	-	h	h	a	h	-	a	-	a	h	h	a	a	a	h	a	h	h	-	a	a	a	h	-	a	a	a	h	a	a	h	h	a	h	h	h	a
*scaffold12_1655253	a	h	a	h	h	h	h	h	a	-	a	a	a	h	h	a	h	a	a	-	a	h	h	a	a	a	h	a	h	h	a	a	a	a	h	a	a	a	-	h	a	a	h	h	a	h	h	h	a
*scaffold12_1746770C	a	h	a	h	h	-	h	h	a	a	a	a	a	h	h	a	h	a	a	a	a	h	h	a	a	a	h	a	h	h	a	a	a	a	h	a	a	a	a	h	a	a	h	h	a	h	h	h	a
*scaffold12_1992335C	a	h	a	-	-	h	h	h	a	a	a	a	a	h	h	a	-	a	a	a	a	h	h	a	a	a	h	a	h	h	a	a	a	a	h	a	a	a	a	h	a	a	h	h	a	h	h	h	a
*scaffold12_2021286	a	h	-	h	h	h	h	h	a	-	a	-	-	h	h	a	h	-	a	-	a	h	h	a	a	a	h	a	h	h	-	a	a	a	h	a	a	-	-	h	a	a	h	h	a	h	h	h	a
*scaffold12_2073223C	a	h	a	-	-	h	h	h	a	a	a	a	a	h	h	a	-	a	a	a	a	-	h	a	a	a	h	a	h	h	a	a	a	a	-	a	a	a	a	h	a	a	h	h	a	h	h	h	a
*scaffold12_2073264	a	h	-	h	h	h	h	h	a	a	a	a	a	h	h	a	h	a	a	-	a	h	h	a	a	a	h	a	h	h	a	a	a	a	h	a	a	a	a	h	a	a	h	h	a	h	h	h	a
*scaffold12_2073315C	a	h	a	-	-	h	h	h	a	a	a	a	a	h	h	a	-	a	a	a	a	-	h	a	a	a	h	a	h	h	a	a	a	a	-	a	a	a	a	h	a	a	h	h	a	h	h	h	a
*scaffold12_2159748	a	h	-	h	h	h	h	h	a	a	a	a	a	h	h	a	h	a	a	-	a	h	h	a	a	a	h	a	h	h	-	a	a	a	h	a	a	-	-	h	a	a	h	h	a	h	h	h	-
*scaffold12_2214601	a	h	a	h	h	-	h	h	a	a	a	a	a	h	h	a	h	a	a	-	a	h	h	a	a	a	h	a	h	-	a	a	a	a	-	a	a	a	a	h	a	a	h	h	a	-	h	-	a
*scaffold12_2435965	a	h	a	h	-	h	h	-	a	a	a	a	a	h	h	a	h	a	a	-	a	h	h	a	a	a	h	a	h	-	a	a	a	a	h	a	a	a	a	h	a	a	h	h	a	-	h	h	a
*scaffold12_2545705C	a	h	a	-	h	h	h	h	a	a	a	a	a	-	h	a	h	a	a	a	a	h	h	a	a	a	h	a	h	h	a	a	a	a	h	a	a	a	a	h	a	a	h	h	a	h	h	h	a
*scaffold12_2565884C	a	h	a	-	h	h	h	h	a	a	a	a	a	h	h	a	h	a	a	a	a	-	-	a	a	a	h	a	h	-	a	a	a	a	h	a	a	a	a	h	a	a	h	h	a	h	h	h	a
*scaffold12_2565893C	a	h	a	-	h	h	h	h	a	a	a	a	a	h	h	a	h	a	a	a	a	-	-	a	a	a	h	a	h	-	a	a	a	a	h	a	a	a	a	h	a	a	h	h	a	h	h	h	a
*scaffold12_2565903	a	h	a	h	h	h	h	h	a	a	a	a	a	h	h	a	h	a	a	h	a	h	h	a	a	a	h	a	h	h	-	a	a	a	h	a	a	-	a	h	a	a	h	h	a	h	h	h	a
*scaffold12_2566046C	a	h	a	-	h	h	h	h	a	a	a	a	a	h	h	a	h	a	a	a	a	-	-	a	a	a	h	a	h	-	a	a	a	a	h	a	a	a	a	h	a	a	h	h	a	h	h	h	a
*scaffold12_2621256	a	h	a	h	h	h	h	h	a	a	a	a	a	h	h	a	h	a	a	-	a	h	h	a	a	a	h	a	h	h	a	a	a	a	h	a	a	a	a	h	a	a	h	h	a	h	h	h	a
*scaffold12_468811	a	h	a	h	h	h	h	h	a	a	a	a	a	h	h	a	h	h	a	-	a	h	h	a	a	a	h	a	h	h	a	h	a	a	h	a	a	-	a	h	a	a	h	h	a	h	h	a	a
*scaffold12_478966	a	h	a	h	h	h	h	h	a	a	a	a	a	h	h	a	h	h	a	-	a	h	h	a	a	a	h	a	h	h	a	h	a	a	h	a	a	a	a	h	a	a	h	h	a	h	h	a	a
*scaffold12_499653	a	h	-	h	h	h	h	h	a	a	a	a	-	h	h	a	h	h	a	-	a	h	h	a	a	a	h	a	h	h	-	h	a	a	h	a	a	-	a	h	a	a	h	h	a	h	h	a	a
*scaffold12_563937C	a	h	a	h	h	h	h	h	a	a	a	a	a	h	h	a	h	h	a	a	a	h	-	a	a	a	-	a	h	-	a	h	a	a	-	a	a	a	a	-	a	a	h	h	a	h	h	a	a
*scaffold12_592998	a	h	a	h	h	h	h	h	a	a	a	a	a	h	h	a	h	h	a	-	a	h	h	a	a	a	h	a	h	h	a	h	a	a	h	a	a	a	a	h	a	a	h	h	a	h	h	a	a
*scaffold12_596095	a	h	a	h	h	h	h	h	a	a	a	a	a	h	h	a	h	h	a	h	a	h	h	a	a	a	h	a	h	h	a	h	a	a	h	a	a	a	a	h	a	a	h	h	a	h	h	a	a
*scaffold12_638739C	a	h	a	-	-	h	h	h	a	a	a	a	a	h	-	a	h	-	a	a	a	-	h	a	a	a	h	a	h	h	a	h	a	a	h	a	a	a	a	h	a	a	h	h	a	h	h	a	a
*scaffold12_638846C	a	h	a	-	-	h	h	h	a	a	a	-	a	h	-	a	h	-	a	a	a	-	h	a	a	a	h	a	h	h	a	h	a	a	h	a	a	a	a	h	a	a	h	h	a	h	h	a	a
*scaffold12_696914	a	h	-	h	h	h	h	h	a	a	a	a	a	h	h	a	h	h	a	-	a	h	h	a	a	a	h	a	h	h	-	h	a	a	h	a	a	a	a	h	a	a	h	h	a	h	h	a	a
*scaffold12_733395C	a	h	a	-	-	h	h	h	a	a	a	a	a	h	-	a	-	h	a	a	a	h	h	a	a	a	-	a	h	h	a	h	a	a	h	a	a	a	a	h	a	a	h	h	a	h	-	a	a
*scaffold12_744088	a	h	-	h	h	h	h	h	a	a	-	a	-	h	h	a	h	h	a	-	a	h	h	a	a	a	h	a	h	h	-	h	a	a	h	a	a	a	-	h	a	a	h	h	a	h	h	a	a
*scaffold120_159858	h	h	a	-	a	a	h	h	h	a	a	a	a	h	h	h	h	h	h	h	h	a	h	h	h	a	h	h	h	a	h	a	a	a	a	a	h	a	h	h	a	a	a	h	h	h	h	h	a
*scaffold120_884402C	h	h	-	a	a	a	h	h	h	a	a	a	a	a	-	h	-	a	h	a	h	a	h	h	h	a	h	h	h	a	-	a	a	a	a	a	h	a	-	h	a	a	a	h	h	h	h	a	a
*scaffold120_886006	h	h	a	a	a	a	h	h	h	a	a	a	a	a	h	h	h	-	h	h	h	a	h	h	h	a	h	h	h	a	h	a	a	a	a	a	h	a	h	h	a	a	a	h	h	-	h	a	a
*scaffold120_886056C	h	h	a	a	a	a	h	h	h	a	a	a	a	a	h	h	h	a	h	h	h	a	h	h	h	a	h	h	h	a	h	a	a	a	a	a	h	a	h	h	a	a	a	h	h	h	h	a	a
*scaffold121_501523C	a	h	h	h	h	a	a	h	h	a	h	a	a	a	-	a	a	-	a	a	h	a	h	a	a	a	h	h	h	a	-	a	h	h	a	a	a	h	-	a	a	a	h	a	a	h	a	h	h
*scaffold121_764949C	-	h	h	-	-	a	a	h	h	a	h	-	a	a	-	a	a	h	a	a	h	a	-	a	a	a	h	h	h	a	h	a	h	h	a	a	a	h	h	a	a	a	h	a	a	h	a	h	h
*scaffold121_777926	a	h	h	h	h	a	a	h	h	-	h	a	a	-	h	a	-	h	a	-	h	-	h	a	a	a	h	h	h	a	h	a	h	h	a	a	a	h	h	a	a	a	h	a	a	h	a	h	h
*scaffold122_753105C	a	a	a	-	a	a	a	a	h	a	a	-	h	a	a	a	h	a	a	-	a	h	a	h	h	a	a	a	h	-	a	h	h	a	a	a	a	h	h	a	a	a	a	a	a	a	a	h	h
*scaffold123_18658	a	h	h	-	h	h	a	a	a	h	a	h	h	h	a	h	h	a	a	h	h	a	a	a	a	h	a	a	a	h	a	h	a	a	a	a	a	h	h	a	h	a	h	h	h	h	a	a	a
*scaffold124_19109	h	h	a	-	h	h	h	a	h	h	a	a	a	h	h	h	h	a	h	-	a	h	a	h	h	a	a	a	h	h	h	a	h	h	h	a	h	h	h	h	h	a	a	h	a	a	h	a	h
*scaffold124_393616	h	h	a	a	h	h	h	a	a	h	a	a	a	h	h	-	h	a	h	-	a	h	a	h	h	a	a	a	h	h	h	a	h	h	h	a	h	h	h	h	h	-	a	h	a	-	h	a	h
*scaffold124_393628	h	h	a	-	h	h	h	a	a	h	a	a	a	h	h	-	h	a	h	-	a	h	a	h	h	a	a	a	h	h	h	a	h	h	h	a	h	h	h	h	h	-	a	h	a	a	h	a	h
*scaffold124_744316	h	h	a	-	h	h	h	a	a	h	a	a	a	h	h	-	h	a	h	a	a	h	a	h	h	a	a	a	h	h	h	a	h	h	h	a	h	h	h	h	h	a	a	h	a	a	h	a	h
*scaffold124_744462	h	h	a	-	h	h	h	a	a	h	a	a	a	h	h	h	h	a	h	-	a	h	a	h	h	a	a	a	h	h	h	a	h	h	h	a	h	h	h	h	h	a	a	h	a	a	h	a	h
*scaffold124_744487C	h	h	a	a	h	h	h	a	a	h	a	a	a	h	h	h	h	a	h	a	a	h	a	h	h	a	a	-	h	h	-	a	h	h	h	a	h	h	h	h	h	a	a	h	a	a	h	a	h
*scaffold124_845124	h	h	a	a	h	h	h	a	a	h	a	a	a	h	h	a	h	a	h	-	a	h	a	h	h	a	a	a	h	h	h	a	h	h	h	a	h	h	h	h	h	a	a	h	a	a	h	a	h
*scaffold124_897427	h	h	a	a	h	h	h	a	a	h	a	a	a	h	h	a	h	a	h	-	a	h	a	h	h	a	a	a	h	h	h	-	h	h	h	-	h	h	h	h	h	-	a	h	a	a	h	-	h
*scaffold125_606265C	a	a	h	a	h	h	a	a	h	h	h	a	a	a	a	a	a	a	a	-	h	h	h	a	a	a	a	h	a	h	-	a	a	h	h	a	a	h	h	a	h	h	h	h	h	h	h	a	h
*scaffold125_752925	a	a	h	-	h	h	a	a	h	h	h	a	-	-	-	a	a	-	a	h	h	h	h	a	a	a	a	h	a	h	h	a	a	h	h	a	a	h	h	a	h	h	h	h	h	h	h	a	h
*scaffold126_632081C	a	h	a	-	a	a	h	a	h	a	h	a	a	a	a	h	a	h	h	-	h	a	a	h	h	h	a	h	a	h	-	a	h	a	a	h	h	a	a	h	h	h	h	a	h	h	a	a	h
*scaffold126_776595	a	h	a	h	a	a	h	a	h	-	h	a	-	a	-	h	a	h	-	h	h	-	a	h	h	h	a	h	a	h	h	a	h	a	-	h	h	-	a	h	h	h	h	a	h	h	a	a	h
*scaffold126_793486	a	h	a	h	-	a	h	a	h	a	h	a	-	-	a	h	-	h	h	h	h	-	a	h	h	h	a	h	a	h	h	a	h	a	a	h	h	-	-	h	h	h	h	a	h	h	a	a	h
*scaffold126_793493	a	h	a	h	-	a	h	a	h	a	h	a	-	-	a	h	-	h	h	h	h	-	a	h	h	h	a	h	a	h	h	a	h	a	a	h	h	-	-	h	h	h	h	a	h	h	a	a	h
*scaffold127_154212	a	a	h	h	h	-	a	h	h	a	h	a	a	h	h	a	a	a	a	h	h	a	h	h	a	a	h	h	h	a	h	a	h	h	-	a	a	h	h	a	-	h	h	a	a	h	a	h	h
*scaffold128_200378	a	a	a	a	a	a	h	a	a	a	a	a	a	a	h	a	a	-	a	-	h	a	h	h	a	a	h	h	a	h	a	h	a	a	h	a	a	h	-	h	h	a	a	a	h	h	h	a	a
*scaffold128_345522	a	a	a	a	a	a	h	a	a	a	a	a	a	a	h	a	a	a	a	-	h	a	h	h	a	a	h	h	a	h	a	h	a	a	h	a	a	h	a	h	a	a	a	a	h	h	h	a	a
*scaffold128_517464	a	a	a	-	a	a	h	a	a	a	a	a	a	a	h	a	a	a	a	-	h	-	h	h	a	a	h	h	a	h	a	h	a	a	h	a	a	h	a	h	a	-	a	a	h	h	h	a	a
*scaffold128_833258	a	h	a	a	h	h	a	h	a	a	h	a	a	h	a	a	h	h	a	-	a	h	h	h	h	a	h	a	a	h	h	a	h	a	h	h	a	a	a	h	h	a	a	h	h	h	a	a	a
*scaffold128_939956	a	a	a	a	a	a	h	a	a	a	a	a	a	a	h	a	a	a	a	a	h	a	h	h	a	a	h	h	a	h	-	h	-	a	h	a	a	h	a	h	a	-	a	a	h	h	h	-	a
*scaffold129_230664C	a	h	a	a	h	a	h	h	a	h	a	h	h	a	h	h	a	h	a	-	a	-	a	h	a	h	h	a	a	a	-	h	a	a	h	-	a	h	a	h	h	a	h	h	a	h	h	a	a
*scaffold129_277375	a	h	-	-	h	a	h	h	a	h	a	h	h	a	h	h	-	h	a	-	a	h	a	h	a	h	h	a	a	a	h	h	a	a	h	h	a	h	a	h	h	a	h	h	a	h	h	a	a
*scaffold129_354351	a	h	-	-	h	a	h	h	a	h	a	h	h	a	h	h	-	h	a	-	a	h	a	h	a	h	h	a	a	a	h	h	a	a	h	h	a	h	a	h	h	a	h	h	a	h	h	a	a
*scaffold129_373022	a	h	a	-	h	a	h	h	a	h	a	h	h	a	h	h	a	h	a	-	a	h	a	h	-	h	h	a	a	-	h	h	a	a	h	h	a	h	a	h	h	-	h	h	a	h	h	a	a
*scaffold129_392866	a	h	-	-	h	a	h	h	a	h	a	h	h	a	h	h	-	h	a	-	a	h	a	h	a	h	h	a	a	a	h	h	a	a	h	h	a	h	a	h	h	a	h	h	a	h	h	a	a
*scaffold129_433087C	a	h	a	a	h	a	h	h	a	h	a	h	h	a	h	h	a	h	a	a	a	h	a	h	a	h	h	a	a	a	-	h	a	a	h	h	a	h	a	h	h	a	h	h	a	h	h	a	a
*scaffold129_443743C	a	h	a	a	-	a	h	h	a	h	a	h	-	a	h	h	a	h	a	a	h	h	a	h	a	h	h	a	a	a	-	h	a	a	h	h	a	-	a	h	h	a	h	h	a	h	h	a	a
*scaffold13_1088669	a	h	a	a	h	h	h	a	a	h	a	a	a	a	a	a	a	a	h	a	h	h	h	a	a	h	a	a	a	h	a	a	h	h	a	h	h	a	a	h	h	h	h	a	a	h	h	h	a
*scaffold13_1088721	a	h	a	a	h	h	h	a	a	h	a	a	a	a	a	a	a	a	h	a	h	h	h	a	a	h	a	a	a	h	a	a	h	h	a	h	h	a	a	h	h	h	h	a	a	h	h	h	a
*scaffold13_115887	a	h	a	-	h	a	-	h	a	a	a	h	h	h	h	h	a	h	a	-	a	h	a	h	a	h	h	a	h	h	h	h	a	a	h	a	a	a	a	h	a	a	h	h	a	h	h	a	a
*scaffold13_1182463	a	h	a	-	h	a	h	h	a	a	a	h	h	h	h	h	h	h	a	-	a	h	a	h	a	h	h	a	h	h	h	h	a	a	h	a	a	a	a	h	a	a	h	h	a	h	h	a	a
*scaffold13_1246430C	a	h	a	a	h	a	h	h	a	a	a	h	h	h	h	h	h	h	a	a	a	-	a	h	a	h	h	a	h	h	h	h	a	a	h	a	a	a	a	h	a	a	h	h	a	h	h	a	a
*scaffold13_1399977	a	h	a	a	h	a	h	h	a	a	a	h	h	h	h	h	h	h	a	-	a	h	a	h	a	h	h	a	h	h	h	h	a	a	h	a	a	-	a	h	a	a	h	h	a	h	h	a	a
*scaffold13_1405382C	a	h	a	a	-	a	h	h	a	a	a	h	h	h	h	h	-	-	a	a	a	h	a	h	a	h	h	a	h	h	-	h	a	a	h	a	a	a	a	h	a	a	h	h	a	h	h	a	a
*scaffold13_1522698	a	h	-	-	h	a	h	h	a	a	a	h	h	h	h	h	h	h	a	a	a	h	a	h	a	h	h	a	h	h	h	h	a	a	h	a	a	a	a	h	a	a	h	h	a	h	h	a	a
*scaffold13_1533261C	a	h	a	a	h	a	h	h	-	a	a	h	h	h	h	h	h	h	a	a	a	h	a	h	a	h	h	a	h	h	-	-	a	a	-	a	a	a	a	h	a	a	h	h	a	h	-	a	a
*scaffold13_1558951C	a	h	a	h	a	a	h	a	h	-	h	a	a	a	a	h	a	h	h	-	h	a	h	h	h	h	a	h	-	h	-	a	h	a	a	-	h	a	a	h	h	h	h	a	h	h	a	a	h
*scaffold13_1729123	a	h	a	-	h	a	h	h	a	a	a	h	-	h	h	h	h	h	a	-	a	h	a	h	a	h	h	a	h	h	h	h	a	a	h	a	a	a	a	h	a	a	h	h	a	h	h	a	a
*scaffold13_1729209	a	h	a	-	h	a	h	h	a	a	a	h	h	h	h	h	h	h	a	h	a	h	a	h	a	h	h	a	h	h	h	h	a	a	h	a	a	a	-	h	a	a	h	h	a	h	h	a	a
*scaffold13_182288	a	h	a	a	h	a	h	h	a	-	a	h	h	h	h	h	a	h	a	-	a	h	a	h	a	h	h	a	h	h	h	h	a	a	h	a	a	-	a	h	a	a	h	h	a	h	h	a	a
*scaffold13_182298C	a	h	a	a	h	a	h	h	a	a	a	h	h	h	h	h	a	-	a	a	a	h	a	h	a	h	h	a	h	h	-	h	a	a	h	a	a	a	a	h	a	a	h	h	a	h	h	a	a
*scaffold130_635198C	a	h	-	-	h	h	-	a	a	a	h	a	a	h	-	a	-	a	h	a	h	-	h	a	a	a	h	h	a	a	a	a	a	a	h	a	h	h	a	a	h	a	h	h	a	a	-	h	a
*scaffold130_635243	a	h	h	h	h	h	h	a	a	a	h	a	-	h	h	a	h	-	h	-	h	h	h	a	a	a	h	h	a	a	a	a	a	a	h	a	h	h	a	a	h	a	h	h	a	a	h	h	a
*scaffold130_653353C	a	h	-	-	-	h	h	a	a	a	h	a	a	-	-	a	-	a	h	a	h	-	h	a	a	a	h	h	a	a	a	a	a	a	h	a	h	h	a	a	h	a	h	h	a	a	h	h	a
*scaffold130_653445C	a	h	-	-	-	h	h	a	a	a	h	a	a	-	-	a	-	a	h	a	h	-	h	a	a	-	h	h	a	a	a	a	a	a	h	a	h	h	a	a	h	a	h	h	a	a	h	h	a
*scaffold130_653470C	a	h	-	-	-	h	h	a	a	a	h	a	a	-	-	a	-	a	h	a	h	-	h	a	a	-	h	h	a	a	a	a	a	a	h	a	h	h	a	a	h	a	h	h	a	a	h	h	a
*scaffold130_689521C	a	h	h	-	h	h	h	a	a	a	h	a	a	h	h	a	h	a	h	a	h	h	h	a	a	a	h	h	a	a	a	a	a	a	h	a	h	h	a	a	h	a	h	h	a	a	h	h	a
*scaffold130_775608	a	h	h	h	h	h	h	a	a	a	h	a	a	h	h	a	h	-	h	-	h	h	h	a	a	a	h	h	a	a	a	a	a	a	h	a	h	h	-	a	h	a	h	h	a	a	h	h	a
*scaffold130_825808	a	h	h	h	h	h	h	a	a	a	h	a	a	h	h	a	h	a	h	-	h	h	h	a	a	a	h	h	a	a	a	a	a	a	h	a	h	h	a	a	h	a	h	-	a	a	h	h	a
*scaffold130_825947	a	h	h	h	h	h	h	a	a	a	h	a	a	h	h	a	h	a	h	-	h	h	h	a	a	a	h	h	a	a	a	a	a	a	h	a	h	h	a	a	h	a	h	h	a	a	h	h	a
*scaffold131_153456	a	h	-	-	h	a	h	h	a	h	a	h	h	a	h	h	-	h	a	-	-	h	a	h	a	h	h	a	a	a	h	h	a	a	h	h	a	h	a	h	a	a	h	h	a	h	h	a	a
*scaffold131_240794C	a	h	a	a	h	a	h	h	a	-	a	h	h	a	h	h	a	h	a	a	a	-	a	h	a	h	h	a	a	a	-	-	a	a	h	-	a	-	a	h	a	a	h	h	a	h	h	a	a
*scaffold131_252726C	a	h	a	a	-	a	h	h	a	h	a	h	h	a	-	h	a	-	a	a	a	-	a	h	a	h	h	a	a	a	h	h	a	a	h	h	a	h	a	h	a	a	h	h	a	h	h	a	a
*scaffold131_355987C	a	h	a	a	-	a	h	h	a	h	a	h	-	a	-	h	a	h	a	a	a	-	a	h	a	h	h	a	a	a	-	h	a	a	h	h	a	h	a	h	-	a	h	h	a	h	h	a	a
*scaffold131_614845	a	h	a	a	h	a	h	h	a	h	a	h	h	a	h	h	a	h	a	a	a	h	a	h	a	h	h	a	a	-	h	h	a	-	h	h	a	h	-	h	a	a	h	h	a	h	h	a	a
*scaffold131_620754C	a	a	h	a	h	h	a	a	a	h	h	a	a	a	-	a	a	a	a	h	h	h	-	a	h	h	h	h	a	-	h	a	a	h	h	a	a	h	h	a	h	-	h	h	h	h	h	a	h
*scaffold131_620755C	a	a	h	a	h	h	a	a	a	h	h	a	a	a	-	a	a	a	a	h	h	h	-	a	h	h	h	h	a	-	h	a	a	h	h	a	a	h	h	a	h	-	h	h	h	h	h	a	h
*scaffold131_628523C	a	h	a	a	h	a	h	h	a	h	a	h	h	a	h	h	a	h	a	a	a	-	a	h	a	h	h	a	a	a	h	h	a	a	h	h	a	-	a	h	a	a	h	h	a	h	h	a	a
*scaffold131_628570	a	h	-	a	h	a	h	h	a	h	a	h	h	a	h	h	a	h	a	-	a	h	a	h	a	h	h	a	a	a	h	h	a	a	h	h	a	h	a	h	a	a	h	h	a	h	h	a	a
*scaffold131_628591C	a	h	a	a	h	a	h	h	a	h	a	h	h	a	h	h	a	h	a	a	a	-	a	h	a	h	h	a	a	a	h	h	a	a	h	h	a	-	a	h	a	a	h	h	a	h	h	a	a
*scaffold131_729174	a	h	-	-	h	a	h	-	a	h	-	h	h	-	h	h	-	h	a	-	a	h	a	h	a	h	h	a	a	a	h	h	a	a	h	h	a	h	a	h	a	a	h	h	a	h	h	a	a
*scaffold132_433304C	a	h	a	-	a	a	a	a	h	h	-	a	a	-	-	a	a	a	h	a	h	-	a	h	a	a	a	h	h	a	a	a	a	a	a	h	h	h	a	a	h	a	h	h	h	h	a	h	h
*scaffold132_641808	a	-	a	h	a	a	a	a	h	h	-	a	a	h	h	a	a	-	h	a	-	h	a	h	a	a	a	h	h	a	a	a	a	a	a	h	h	-	a	a	-	a	h	-	h	h	a	h	h
*scaffold132_756881	a	h	a	h	a	a	a	a	h	h	h	a	a	h	h	a	a	a	h	-	h	h	a	h	a	a	a	h	h	a	a	a	a	a	a	h	h	h	a	a	h	a	h	h	h	h	a	h	h
*scaffold132_816107C	a	h	a	-	a	a	a	a	h	h	h	a	a	h	-	a	a	a	h	a	h	-	a	h	a	a	a	h	h	a	a	a	a	a	a	h	h	-	a	a	h	a	h	h	h	h	a	h	h
*scaffold132_816127	a	h	a	h	a	a	a	a	-	h	h	a	a	h	h	a	-	-	h	-	h	h	a	h	a	a	a	h	h	-	-	a	a	a	-	h	h	h	-	a	h	a	h	h	h	h	a	h	h
*scaffold132_924928C	a	h	a	h	a	a	a	a	h	h	h	a	a	h	h	a	a	a	-	a	h	h	a	h	a	a	a	h	h	a	a	a	a	a	a	-	h	-	a	a	h	a	-	h	h	h	a	h	h
*scaffold132_975663	a	h	a	h	a	a	a	a	h	h	h	a	a	h	h	a	a	a	h	-	h	h	a	h	a	a	a	h	h	a	-	a	a	a	a	h	h	h	-	a	h	a	h	h	h	h	a	h	h
*scaffold133_100258C	h	a	a	-	a	h	a	a	h	a	a	h	-	a	a	h	h	a	h	a	a	a	a	h	a	a	h	h	h	a	a	h	h	a	a	a	h	a	h	a	h	h	h	a	h	a	h	h	a
*scaffold133_258192	h	a	a	h	a	h	a	a	h	a	a	h	h	a	a	h	h	a	h	-	a	a	a	h	a	a	h	h	h	h	a	h	h	a	a	a	h	a	h	a	h	h	h	a	h	a	h	h	a
*scaffold133_258200	h	a	a	h	a	h	a	a	h	a	a	h	h	a	a	h	h	a	h	-	a	a	a	h	a	a	h	h	h	h	a	h	h	a	a	a	h	a	h	a	h	h	h	a	h	a	h	h	a
*scaffold133_441768	h	a	a	h	a	h	a	a	h	-	a	h	h	a	a	h	h	a	h	-	a	a	a	h	a	a	h	h	h	h	-	h	h	a	-	a	h	-	h	a	h	h	h	a	h	a	h	h	a
*scaffold133_665704	h	a	-	h	a	h	a	a	h	a	a	h	h	a	a	h	h	a	h	-	a	-	a	h	a	a	h	h	h	h	-	h	h	a	a	a	h	a	h	a	h	h	a	a	h	a	h	h	a
*scaffold133_685970C	h	a	a	-	a	h	a	a	h	a	a	h	h	a	a	h	h	a	h	a	a	a	a	h	a	a	h	h	h	h	a	-	h	a	a	a	h	a	h	a	h	h	a	a	h	a	-	h	a
*scaffold133_686184C	h	a	a	-	a	h	a	a	h	a	a	h	h	a	a	h	h	a	h	a	a	a	a	h	a	a	h	h	h	h	a	-	h	a	a	a	h	a	h	a	h	h	a	a	h	a	-	h	a
*scaffold133_760994	h	a	a	h	-	h	a	a	h	-	-	h	h	-	a	h	h	-	h	-	a	a	a	h	a	a	h	h	h	h	a	h	h	a	a	a	h	a	h	a	h	h	a	a	h	a	h	h	a
*scaffold133_778696	h	a	a	h	a	h	a	a	h	a	a	h	h	a	a	h	h	-	h	-	a	a	a	h	a	a	h	h	h	h	-	h	h	a	a	a	h	-	h	a	h	h	a	a	h	a	h	h	a
*scaffold133_843407C	h	a	a	-	a	h	a	a	h	a	a	h	h	a	a	h	h	a	h	a	a	a	a	h	a	a	h	h	h	h	a	h	h	a	a	a	h	a	h	a	h	h	a	a	h	a	h	h	a
*scaffold133_890454C	h	a	a	h	a	h	a	a	h	a	a	h	h	a	a	h	h	a	h	a	a	a	a	h	a	a	h	h	h	h	a	h	h	a	a	a	h	a	h	a	h	h	a	a	h	a	h	h	a
*scaffold134_159961	h	h	h	h	h	h	a	a	a	h	a	h	h	h	a	h	h	a	a	h	h	a	a	a	a	h	a	h	a	h	a	h	a	a	a	a	a	h	h	a	h	a	h	a	h	h	a	a	a
*scaffold135_347189	a	h	a	h	h	h	a	a	a	h	h	h	h	h	a	a	h	a	h	h	a	a	a	a	a	h	a	a	a	h	-	h	a	a	a	-	h	h	h	a	a	a	h	h	h	h	a	a	-
*scaffold135_421639C	a	h	a	-	h	h	a	a	a	-	h	h	h	-	a	a	h	a	-	-	a	a	a	a	a	-	a	a	a	h	a	h	a	a	a	a	h	-	-	a	a	a	h	h	h	h	a	a	a
*scaffold136_120064C	h	a	h	a	a	a	a	a	h	h	a	a	a	a	h	a	a	a	h	-	a	a	a	a	a	a	h	h	h	h	-	h	a	-	h	h	h	a	-	a	a	h	h	h	h	h	a	h	h
*scaffold136_801569C	h	a	-	a	a	a	a	a	h	h	a	a	a	a	-	a	a	a	h	-	a	a	a	a	a	a	a	h	h	h	-	h	a	h	h	h	h	a	-	a	a	h	a	h	h	h	a	h	h
*scaffold137_1084198C	h	a	h	a	a	a	a	h	a	a	a	h	h	h	a	a	a	a	h	-	a	a	h	h	h	h	a	a	a	h	a	h	h	h	a	h	h	h	h	h	a	h	a	a	a	a	a	h	h
*scaffold137_1171129	h	a	h	-	-	a	a	h	a	a	a	h	h	h	-	a	a	a	h	h	a	a	h	h	h	h	a	a	a	h	a	h	h	h	a	h	h	h	h	h	a	h	a	a	a	a	a	h	h
*scaffold137_1342562	h	a	h	-	-	a	a	h	a	a	-	h	h	h	-	a	-	a	h	h	a	-	h	h	h	h	a	a	a	h	a	h	h	h	a	h	h	h	h	h	a	h	a	a	a	a	a	h	h
*scaffold137_1482869C	h	-	-	a	a	a	a	h	a	a	a	h	h	h	a	a	a	a	h	-	a	a	h	h	h	h	a	a	a	h	a	h	h	h	a	-	h	h	-	h	a	h	a	a	a	a	-	h	h
*scaffold137_1482870C	h	-	-	a	a	a	a	h	a	a	-	h	h	h	a	a	a	a	h	-	a	a	h	h	h	h	a	a	a	h	a	h	h	h	a	-	h	h	h	h	a	h	a	a	a	a	-	h	h
*scaffold137_242002	h	a	h	a	a	a	a	h	a	-	a	h	h	a	a	a	-	a	a	h	a	-	h	h	h	h	a	a	a	h	-	h	h	h	a	h	a	h	h	h	h	h	a	a	a	a	a	a	h
*scaffold137_242006C	h	a	h	a	a	a	a	h	a	a	a	h	h	a	a	a	a	a	a	-	a	a	h	h	-	h	a	a	a	h	a	h	h	h	a	h	a	-	h	h	h	h	a	a	a	a	a	a	h
*scaffold137_261523C	a	a	a	-	a	a	h	a	a	a	h	a	a	h	a	h	-	-	h	a	a	a	a	a	a	h	h	h	a	a	a	a	h	a	h	h	h	a	h	h	a	h	h	a	h	h	a	a	a
*scaffold137_261528C	a	a	a	-	a	a	h	a	a	a	h	a	a	h	a	h	-	-	h	a	a	a	a	a	a	h	h	h	a	a	a	a	h	a	h	h	h	a	h	h	a	h	h	a	h	h	a	a	a
*scaffold137_276736C	h	a	h	a	a	a	a	h	a	a	a	h	h	a	a	-	a	a	a	-	a	a	h	h	h	h	a	a	a	h	a	h	h	h	a	h	a	h	h	-	h	h	a	a	a	a	a	a	h
*scaffold137_28004C	h	a	-	a	a	a	a	-	a	a	a	h	-	a	a	a	a	a	a	a	a	a	h	h	h	h	a	a	a	h	a	h	h	h	a	-	a	h	-	h	h	h	a	a	a	a	a	a	h
*scaffold137_298358C	h	a	h	a	a	a	a	h	a	a	a	h	h	a	a	a	a	a	a	h	a	a	h	h	h	h	a	a	a	h	a	h	h	h	a	h	a	h	h	h	h	h	a	a	a	a	a	a	h
*scaffold137_338341	h	a	h	-	-	a	a	h	a	-	a	-	h	-	a	a	a	-	a	h	a	-	h	h	h	h	a	a	a	h	a	h	h	h	a	h	a	h	h	h	h	h	a	a	a	a	a	a	h
*scaffold137_376284	h	a	h	-	a	a	a	h	a	-	a	h	h	a	a	a	a	a	a	h	a	-	h	h	h	h	a	a	a	h	-	h	h	h	a	h	a	h	h	h	h	h	-	a	a	a	a	a	h
*scaffold137_379757C	h	a	-	a	a	a	a	h	a	a	a	h	h	a	a	a	a	a	-	-	-	a	h	h	h	h	a	a	a	h	a	h	h	h	a	h	a	h	h	h	h	h	a	a	-	a	a	a	h
*scaffold137_379788	-	a	h	-	-	a	a	h	a	a	a	h	h	a	a	a	a	a	a	h	a	a	h	h	h	h	a	a	a	h	a	h	h	h	a	h	a	h	h	h	h	h	a	a	a	a	a	a	h
*scaffold137_379935	h	a	h	a	a	a	a	h	a	a	a	h	h	a	a	a	a	a	a	h	a	a	h	h	h	h	a	a	a	h	a	h	h	h	a	h	a	h	h	h	h	h	a	a	a	a	a	a	h
*scaffold137_512301	h	a	h	a	-	a	a	h	a	a	a	h	h	-	a	a	a	-	a	h	a	-	h	h	h	h	a	a	a	h	a	h	h	h	a	h	a	h	h	h	h	h	a	a	a	a	a	a	h
*scaffold137_573015C	h	a	h	a	a	a	a	h	a	a	a	-	-	a	a	a	a	a	-	a	a	a	h	h	h	h	a	a	a	-	a	h	h	h	a	h	h	-	-	h	a	h	a	a	a	a	a	a	h
*scaffold137_604533C	h	a	h	a	a	a	a	h	a	a	a	h	h	a	a	a	a	a	h	-	a	a	h	h	h	h	a	a	a	h	a	h	h	h	a	h	h	h	h	h	a	h	a	a	a	a	a	a	h
*scaffold137_604596C	h	a	h	a	a	a	a	h	a	a	a	h	h	a	a	a	a	a	h	-	a	a	h	h	h	h	a	a	a	h	a	h	h	h	a	h	h	h	h	h	a	h	a	a	a	a	a	a	h
*scaffold137_611139	h	a	h	-	a	a	a	h	a	-	a	h	h	a	a	a	a	a	h	h	a	-	h	h	h	h	a	a	a	h	-	h	h	h	a	h	h	h	h	h	a	h	a	a	a	a	a	a	h
*scaffold137_739777C	h	a	h	a	a	a	a	h	a	a	a	h	h	a	a	a	a	a	h	a	a	a	h	h	h	h	a	a	a	h	a	-	h	h	a	h	h	-	h	h	a	h	a	a	a	a	a	a	h
*scaffold137_740035	h	a	h	-	a	a	a	h	a	a	a	h	h	a	a	a	-	a	h	h	a	a	h	h	h	h	a	a	a	h	a	h	h	h	a	h	h	h	h	h	a	h	a	a	a	a	-	a	h
*scaffold137_740778C	h	a	h	a	a	a	a	h	a	a	a	h	h	a	a	a	a	a	a	-	a	a	h	h	h	h	a	a	a	h	a	-	h	h	a	h	h	h	h	h	a	h	a	a	a	a	a	a	h
*scaffold137_753818	h	a	h	a	a	a	a	h	a	a	a	h	h	a	a	a	a	a	h	h	a	-	h	h	h	h	a	a	a	h	-	h	h	h	a	h	h	h	h	h	a	h	a	a	a	a	-	a	h
*scaffold138_1131630	a	-	h	h	h	a	a	a	a	h	a	h	h	a	h	h	h	h	a	a	-	h	a	a	h	a	h	-	a	a	h	a	a	a	a	a	a	a	h	h	a	a	a	h	a	h	-	a	a
*scaffold138_1131798C	a	h	h	h	h	a	a	a	a	h	a	h	h	a	h	h	h	h	a	a	h	h	a	a	h	a	h	h	a	a	h	a	a	a	a	a	a	a	h	h	a	a	a	h	a	h	h	a	a
*scaffold138_1131909	a	h	h	h	h	a	a	a	a	h	-	h	h	a	h	h	h	h	a	-	h	h	a	a	h	a	h	h	a	a	h	a	a	a	a	a	a	a	h	h	a	a	a	h	a	h	h	a	a
*scaffold138_1289821C	a	h	h	-	h	a	a	a	a	h	a	h	h	a	h	h	h	h	a	a	h	-	a	a	h	a	h	h	a	a	h	a	a	a	a	a	a	a	h	h	h	a	a	h	a	h	h	a	a
*scaffold138_1367132	a	h	h	h	h	a	a	a	a	h	a	h	h	a	h	h	h	h	a	-	h	h	a	a	h	a	h	h	a	a	h	a	a	a	a	a	a	a	h	h	h	a	a	h	a	h	h	a	a
*scaffold138_195480C	h	a	a	h	a	h	a	a	h	a	a	h	h	a	a	h	h	a	a	a	a	a	a	h	h	a	h	h	h	a	-	h	h	a	a	a	h	a	h	a	h	h	h	a	h	a	h	h	a
*scaffold138_195490C	h	a	a	h	a	h	a	a	h	a	a	h	h	a	a	h	h	a	a	a	a	a	a	h	-	a	-	h	h	a	-	h	h	a	a	a	h	a	-	a	h	-	h	a	h	a	h	h	a
*scaffold138_195609	h	a	a	h	a	h	a	a	h	a	a	h	h	a	a	h	h	a	h	h	a	-	a	h	h	a	h	h	h	a	h	h	h	a	a	a	h	a	-	a	h	h	h	a	h	a	h	h	a
*scaffold138_195616	h	a	a	h	a	h	a	a	h	a	a	h	h	a	a	h	h	a	h	h	a	-	a	h	h	a	h	h	h	a	h	h	h	a	a	a	h	a	-	a	h	h	h	a	h	a	h	h	a
*scaffold138_230239C	h	a	a	-	a	h	a	a	h	a	a	h	h	a	a	h	h	a	h	a	a	a	a	h	h	a	h	h	h	a	h	h	h	a	a	a	h	a	h	a	-	h	h	a	h	a	h	h	a
*scaffold138_570408	a	h	h	h	h	a	a	a	a	h	a	h	h	a	h	h	h	h	a	-	h	h	a	a	h	a	h	a	a	a	h	-	a	a	-	-	a	-	h	h	-	a	a	h	a	h	h	a	a
*scaffold138_612703	a	h	h	h	h	a	a	a	a	h	-	h	h	a	h	h	h	h	a	-	h	h	a	a	h	a	h	h	a	a	h	a	a	a	a	a	a	a	h	h	a	a	a	h	a	h	h	a	a
*scaffold138_612794	a	h	h	h	h	a	a	a	a	h	-	h	h	a	h	h	h	h	a	-	h	h	a	a	h	a	h	h	a	a	h	a	a	a	a	a	a	-	h	h	a	a	a	h	a	h	h	a	a
*scaffold138_668341C	a	h	h	h	h	a	-	a	a	-	a	h	h	a	h	h	h	h	a	a	h	-	a	a	-	a	h	h	a	a	-	a	a	a	a	a	a	-	h	h	a	a	a	h	a	h	h	a	a
*scaffold138_82266	h	a	a	h	a	h	a	a	h	a	a	h	h	a	a	h	h	a	h	h	a	-	a	h	h	a	h	h	h	a	h	h	h	a	a	-	h	a	h	a	h	h	h	a	h	a	h	h	a
*scaffold138_999982	a	h	h	h	h	a	a	a	a	h	a	h	h	a	h	h	h	h	a	-	h	h	a	a	h	a	h	h	a	a	h	a	a	a	a	a	a	a	h	h	a	a	a	h	a	h	h	a	a
*scaffold14_101162C	a	a	-	a	-	h	a	a	a	h	h	a	a	a	a	a	a	-	a	-	h	-	h	a	h	a	h	h	h	h	-	a	a	h	h	a	a	h	-	a	h	h	h	h	h	h	h	a	h
*scaffold14_101169	a	a	h	-	h	h	a	a	a	h	h	a	a	a	a	a	a	a	a	h	h	h	h	a	h	a	h	h	h	h	h	a	a	h	h	a	a	h	h	a	h	h	h	h	h	h	-	a	h
*scaffold14_1034632C	a	a	-	a	-	h	a	a	a	h	h	h	h	a	a	a	a	a	a	-	h	-	-	a	h	a	h	h	h	h	h	a	h	h	h	a	a	a	-	a	h	h	h	h	h	h	h	a	h
*scaffold14_116837	a	a	h	-	h	h	a	a	a	h	h	a	a	-	-	a	-	a	a	h	h	h	h	a	h	a	h	h	h	h	h	a	a	h	h	a	a	h	h	a	h	h	h	h	h	h	h	a	h
*scaffold14_1170219C	a	a	h	a	h	h	a	a	a	-	h	h	h	a	a	a	a	a	a	-	h	-	h	a	h	a	h	h	h	h	-	a	h	h	h	a	a	a	-	a	h	h	h	h	h	h	h	a	h
*scaffold14_1186171	a	a	h	-	h	h	-	a	a	h	h	h	h	-	-	a	-	-	a	h	h	h	h	a	h	a	h	h	h	h	h	a	h	h	h	a	a	a	h	a	h	h	h	h	h	h	h	a	h
*scaffold14_1186179	a	a	h	-	h	h	-	a	a	h	h	h	h	-	-	a	-	-	a	h	h	h	h	a	h	a	h	h	h	h	h	a	h	h	h	a	a	a	h	a	h	h	h	h	h	h	h	a	h
*scaffold14_1215614C	a	a	h	a	h	h	a	a	a	-	h	h	h	a	a	a	a	a	a	h	h	-	h	a	h	a	h	h	h	h	h	a	h	h	h	a	a	a	h	a	h	h	h	h	h	h	h	a	h
*scaffold14_1262450C	a	a	-	a	-	h	a	a	a	h	h	-	-	a	a	a	a	a	a	-	h	-	h	a	h	a	h	h	h	-	-	a	h	h	-	a	a	a	h	a	h	h	h	h	h	h	h	a	h
*scaffold14_1303321C	a	a	-	a	-	h	a	a	a	-	-	h	-	a	a	a	a	a	a	-	h	-	h	a	h	a	h	h	h	h	h	a	h	h	h	a	a	a	-	a	h	h	h	h	h	h	h	a	h
*scaffold14_1303330C	a	a	-	a	-	h	a	a	a	-	-	h	-	a	a	a	a	a	a	-	h	-	h	a	h	a	h	h	-	h	h	a	h	h	h	a	a	a	-	a	h	h	h	h	h	h	h	a	h
*scaffold14_1320425C	a	a	-	a	-	h	a	a	a	h	h	h	-	a	a	a	a	a	a	-	h	-	h	a	h	a	h	h	h	h	h	a	h	h	h	a	a	a	-	a	-	h	h	h	h	h	h	a	h
*scaffold14_1592165C	h	a	h	a	h	h	a	a	a	h	h	h	-	a	a	a	a	a	a	-	h	-	h	a	h	a	-	h	h	-	-	a	h	h	h	a	a	a	-	a	h	h	h	h	h	h	-	a	h
*scaffold14_1614593C	h	a	h	a	h	h	a	a	a	h	h	h	h	a	a	a	a	a	a	-	h	-	h	a	h	a	h	h	h	h	h	a	h	h	h	a	a	a	h	a	h	h	h	h	h	h	h	a	h
*scaffold14_1726111	h	h	h	-	h	h	a	-	a	h	h	h	h	a	-	a	-	-	a	h	h	h	h	a	h	a	h	h	h	h	h	a	h	h	h	a	a	a	h	a	h	h	h	h	h	h	h	a	h
*scaffold14_1794767C	h	h	h	a	h	h	a	a	a	h	h	h	h	a	a	a	a	a	a	h	h	-	h	a	h	a	h	h	h	h	-	a	h	h	h	a	a	a	-	a	h	h	h	h	h	h	h	a	h
*scaffold14_1831811C	h	h	h	a	-	h	a	a	a	h	h	h	h	a	a	a	a	a	a	-	h	-	h	a	h	a	h	h	h	h	-	a	h	h	-	a	a	a	h	a	h	h	h	h	h	h	h	a	h
*scaffold14_1877127C	h	h	-	a	-	h	a	a	a	h	h	h	-	a	a	a	a	a	a	-	h	-	h	a	h	a	h	h	h	h	-	a	h	h	h	a	a	a	h	a	h	h	h	h	h	h	h	a	h
*scaffold14_1891708	h	h	h	a	h	h	a	a	a	h	h	h	h	a	a	a	a	a	a	h	h	h	h	a	h	a	h	h	h	h	h	a	h	h	h	a	a	a	h	a	h	h	h	h	h	h	h	a	h
*scaffold14_1933679	h	h	h	a	h	h	a	a	a	h	h	h	h	a	a	a	a	a	a	h	h	h	h	a	h	a	h	h	h	h	h	a	h	h	h	a	a	a	h	a	h	h	h	h	h	h	h	a	h
*scaffold14_1933809C	h	h	h	a	h	h	a	a	a	h	h	h	h	a	a	a	a	a	a	-	h	h	h	a	h	a	h	h	h	h	h	a	h	h	h	a	a	a	h	a	h	h	h	h	h	h	h	a	h
*scaffold14_2344829C	h	a	-	-	a	h	a	h	a	h	-	a	a	a	a	a	-	-	h	a	a	a	h	h	a	h	h	a	h	a	a	a	a	a	h	a	h	a	a	h	a	h	h	h	a	a	h	h	a
*scaffold14_2481771	h	h	-	a	a	a	h	h	h	a	a	a	-	a	h	h	h	a	h	h	h	-	h	-	h	a	h	h	h	a	h	a	a	a	a	a	h	a	h	h	a	a	a	h	h	h	h	a	a
*scaffold14_2481814	h	h	-	a	a	a	h	h	h	a	a	a	-	a	h	h	h	a	h	h	h	-	h	h	h	a	h	h	h	a	h	a	a	a	a	a	h	a	h	h	a	a	a	h	h	h	h	a	a
*scaffold14_2481815	h	h	-	a	a	a	h	h	h	a	a	a	-	a	h	h	h	a	h	h	h	-	h	h	h	a	h	h	h	a	h	a	a	a	a	a	h	a	h	h	a	a	a	h	h	h	h	a	a
*scaffold14_533285	-	a	h	a	h	h	a	a	a	h	h	a	a	a	a	a	a	a	a	h	h	h	h	a	h	a	h	h	h	h	h	a	a	h	h	-	a	a	h	a	h	h	h	h	h	h	h	a	h
*scaffold14_691462	a	a	h	-	h	h	a	a	a	h	h	a	a	a	-	a	a	a	a	h	h	h	h	a	h	a	h	h	h	h	h	a	a	h	h	a	a	-	h	a	h	h	h	h	h	h	h	a	h
*scaffold14_704773C	a	a	h	a	h	h	a	a	a	h	h	a	-	a	a	a	a	a	a	-	h	h	h	a	h	a	h	h	h	h	h	a	a	h	h	a	a	a	h	a	h	h	h	h	h	h	h	a	h
*scaffold14_704775	a	a	h	a	h	h	a	a	a	h	h	a	a	a	a	a	a	-	a	h	h	h	h	a	h	a	h	h	h	h	h	a	a	h	h	a	a	a	h	a	h	h	h	h	h	h	h	a	h
*scaffold14_704784C	a	a	h	a	h	h	a	a	a	h	h	a	-	a	a	a	a	a	a	-	h	h	h	a	h	a	h	h	h	h	h	a	a	h	h	a	a	a	h	a	h	h	h	h	h	h	h	a	h
*scaffold14_704791C	a	a	h	a	h	h	a	a	a	h	h	a	-	a	a	a	a	a	a	-	h	h	h	a	h	a	h	h	h	h	h	a	a	h	h	a	a	a	h	a	h	h	h	h	h	h	h	a	h
*scaffold14_734237	a	a	h	a	h	h	a	a	a	h	h	h	h	a	a	a	a	a	a	h	h	h	h	a	h	a	h	h	h	h	h	a	h	h	h	a	a	-	h	a	h	h	h	-	h	h	h	a	h
*scaffold14_923806C	a	a	-	a	-	h	a	a	a	-	h	h	-	a	a	a	a	a	a	-	h	-	h	a	h	a	h	h	h	h	-	a	h	h	h	a	a	a	-	a	-	h	h	h	h	h	h	a	h
*scaffold14_985663	a	a	h	-	h	h	a	a	a	h	h	h	h	a	a	a	-	-	a	h	h	h	h	a	h	a	h	h	h	h	h	-	h	h	h	a	a	a	h	a	h	h	h	h	h	h	h	a	h
*scaffold140_621018C	h	a	a	h	a	a	h	h	a	h	h	a	a	a	a	a	h	-	h	a	a	a	h	h	a	h	h	a	h	a	a	h	a	h	-	a	h	a	a	h	a	h	h	h	a	a	h	h	a
*scaffold141_345949C	a	a	a	-	h	h	-	h	a	a	a	a	a	h	a	a	-	a	a	a	h	h	h	a	a	a	a	a	a	h	a	a	h	a	h	-	a	-	a	h	a	a	a	a	h	h	a	a	h
*scaffold141_442276	a	a	-	h	-	h	a	h	a	a	a	a	a	h	a	a	h	a	a	-	h	h	h	a	a	a	-	a	a	h	-	a	h	a	h	h	a	-	-	h	-	-	a	a	h	h	a	a	h
*scaffold141_568237C	a	a	a	h	h	h	a	h	a	a	-	a	a	h	a	a	h	a	a	a	h	h	h	a	a	a	a	a	a	h	a	a	h	a	h	h	a	a	a	h	a	a	a	a	h	h	a	a	h
*scaffold141_568366	a	a	a	h	h	h	a	h	a	-	a	a	a	h	a	a	h	a	a	a	h	h	h	a	a	a	a	a	a	h	-	a	h	a	h	h	a	-	-	h	a	a	a	a	h	h	a	a	h
*scaffold141_890694	a	a	a	h	h	h	a	h	a	a	a	a	a	h	a	a	h	a	-	-	h	h	-	a	a	a	a	a	a	-	-	a	h	a	h	h	a	a	a	h	a	a	a	a	h	h	a	a	h
*scaffold141_969002	a	a	a	h	h	h	a	h	a	a	a	a	a	h	-	a	h	a	a	h	h	h	h	a	a	a	a	a	a	h	a	a	h	a	h	h	a	a	a	-	a	a	a	a	h	h	a	a	h
*scaffold142_216867C	a	h	h	-	-	a	a	a	a	h	a	h	h	a	h	h	h	h	a	a	h	-	a	a	h	a	h	a	a	a	h	a	a	a	a	a	a	a	h	h	a	a	a	h	a	h	h	h	a
*scaffold142_311830	a	h	h	h	h	a	a	a	a	h	-	h	h	a	h	h	h	h	a	-	h	h	-	a	h	a	h	a	a	a	h	a	a	a	a	a	a	-	h	h	a	a	a	h	a	h	h	h	a
*scaffold142_415370C	a	h	h	h	h	a	a	a	a	h	a	h	h	a	h	h	h	h	a	a	h	-	a	a	h	a	h	a	a	a	h	a	a	a	a	a	a	a	h	h	a	a	a	h	a	h	h	h	a
*scaffold142_430122	a	h	h	h	h	a	a	a	a	h	a	h	h	-	h	h	h	h	a	-	h	h	a	a	h	a	h	a	a	a	h	a	a	a	a	-	a	a	h	h	a	a	a	h	a	h	h	h	a
*scaffold142_515207	-	h	h	h	h	a	a	a	a	h	a	h	h	a	h	h	h	h	a	-	h	h	a	a	h	a	h	a	a	a	h	a	a	a	a	a	a	a	h	h	a	a	a	h	a	h	h	h	a
*scaffold142_545078C	h	h	a	a	a	a	h	a	h	h	a	a	a	h	-	h	h	a	h	a	a	-	a	a	a	a	a	a	-	h	-	a	h	h	h	a	h	-	h	h	h	a	a	h	a	a	h	a	h
*scaffold142_790058	a	h	h	h	h	a	a	a	a	h	a	h	h	a	h	h	h	h	a	a	h	h	a	a	h	a	h	a	a	a	h	a	a	a	a	a	a	a	h	h	a	a	a	h	a	h	h	h	a
*scaffold142_94859	a	h	h	h	h	a	a	a	a	h	a	h	h	a	h	h	h	h	-	-	h	h	a	a	h	a	h	a	a	a	h	a	a	a	-	a	a	a	h	h	a	a	a	-	a	h	h	h	a
*scaffold142_956312	a	h	h	h	h	a	a	a	a	h	a	h	h	a	h	-	h	h	a	a	h	h	a	a	h	a	h	a	a	a	h	a	a	a	a	a	a	-	h	h	a	a	a	h	a	h	h	h	a
*scaffold143_470736	a	a	a	h	a	a	a	h	a	a	h	h	h	h	-	a	h	a	h	h	a	h	a	h	h	h	a	h	a	a	a	h	a	h	h	h	h	a	h	a	a	a	h	a	h	a	a	a	h
*scaffold143_473060C	a	a	a	h	a	a	a	h	a	a	h	h	h	h	a	-	h	a	h	-	a	h	a	h	h	h	a	h	a	a	a	h	a	h	h	h	h	a	h	a	a	a	h	a	h	a	a	a	h
*scaffold143_476937	a	a	a	h	-	a	a	h	a	a	h	h	h	h	a	a	h	a	h	h	a	h	a	h	h	h	a	h	-	a	a	h	a	h	h	h	h	a	h	a	a	a	h	a	h	a	a	a	h
*scaffold143_504336C	a	a	a	-	a	a	a	h	a	a	h	h	h	h	a	a	h	a	h	-	a	-	a	h	h	h	a	h	a	a	a	h	a	h	h	h	h	a	h	a	a	a	h	a	h	a	a	a	h
*scaffold143_668589	a	a	-	h	a	a	a	h	a	a	h	h	h	h	-	a	h	a	h	h	a	h	a	h	h	h	a	h	a	a	a	h	a	h	h	h	h	a	h	a	a	a	h	a	h	a	a	a	h
*scaffold143_768525C	a	a	a	h	a	a	a	h	a	a	h	h	h	h	a	a	h	a	h	-	h	h	a	h	h	h	a	h	a	a	a	h	a	-	h	-	h	a	-	a	a	a	-	a	h	a	a	a	h
*scaffold143_956154C	a	a	a	-	a	a	a	h	a	a	h	h	-	h	a	a	h	a	h	h	h	h	a	h	h	h	a	h	a	a	a	h	a	h	h	h	h	a	h	a	a	a	h	a	h	a	a	a	h
*scaffold144_355819C	a	h	h	h	h	a	a	h	h	a	h	a	a	h	h	a	a	h	a	a	h	a	h	a	a	a	h	h	h	a	-	a	h	h	a	a	a	-	-	a	a	a	h	a	a	h	a	h	h
*scaffold144_355823	a	h	h	h	h	a	a	h	h	a	h	a	a	h	h	a	a	h	a	a	h	a	h	a	a	a	h	h	h	a	h	a	h	h	a	a	a	h	h	a	a	a	h	a	a	h	a	h	h
*scaffold144_401695	a	h	h	h	h	a	a	-	h	a	h	a	a	h	h	a	a	h	a	-	h	-	h	a	a	a	h	h	h	a	h	a	h	h	a	a	a	h	h	a	a	a	h	a	a	h	a	h	h
*scaffold144_401733	a	h	h	h	h	a	a	h	h	a	h	a	a	h	h	a	a	h	a	-	h	-	h	a	a	a	h	h	h	a	h	a	h	h	a	a	a	h	h	a	a	a	h	a	a	h	a	h	h
*scaffold144_427468	a	h	h	h	h	a	a	h	h	a	h	a	a	h	h	a	a	h	a	-	h	a	-	a	a	a	h	h	h	a	h	a	h	h	a	a	a	h	h	-	a	-	h	a	a	h	a	h	h
*scaffold144_882932	a	h	h	-	h	a	a	h	h	a	h	a	-	-	h	a	-	-	a	-	h	-	h	a	a	a	h	-	h	a	h	a	h	h	a	a	a	-	h	a	a	a	h	a	a	h	a	h	h
*scaffold144_882933C	a	h	-	-	h	a	a	-	h	a	h	a	a	a	-	a	a	-	a	a	-	a	h	a	a	a	h	h	h	a	h	a	h	h	a	a	a	h	h	a	a	a	h	a	a	h	a	h	h
*scaffold144_906597C	a	h	h	-	h	a	a	h	h	a	-	a	a	a	h	a	a	h	a	a	h	a	h	a	a	a	h	h	h	a	-	a	h	h	a	a	a	-	h	a	a	a	h	a	a	h	a	h	h
*scaffold144_907534C	-	h	h	-	h	a	a	h	h	-	h	a	a	a	-	a	a	h	a	a	h	a	h	a	a	-	h	h	h	-	h	a	h	h	a	a	a	-	-	a	a	a	h	a	a	h	a	h	h
*scaffold147_260665	a	h	a	-	h	h	h	a	a	h	a	a	a	-	a	a	a	a	h	-	h	h	h	a	a	h	a	a	a	h	-	a	h	a	a	h	h	-	a	h	h	h	h	a	a	h	h	h	a
*scaffold147_591420	a	h	a	-	h	h	h	a	a	h	a	a	a	a	-	a	a	a	h	-	h	h	h	a	a	h	a	a	a	h	-	a	h	a	a	h	h	a	a	h	h	h	h	a	a	h	h	h	a
*scaffold147_591439	a	h	a	-	h	h	h	a	a	h	a	a	a	a	-	a	a	a	h	-	h	h	h	a	a	h	a	a	a	h	-	a	h	a	a	h	h	-	a	h	h	h	h	a	a	h	h	h	a
*scaffold148_553087C	a	a	a	-	a	a	h	a	a	a	h	a	a	h	-	h	h	a	h	-	a	a	a	h	h	h	h	h	a	a	a	a	h	a	h	-	h	a	h	a	a	a	h	a	h	h	a	a	a
*scaffold149_13213C	a	h	a	h	a	h	h	a	-	h	h	a	a	a	a	h	h	h	a	a	-	h	h	h	a	h	h	a	a	a	h	a	a	h	a	a	-	a	h	h	a	h	h	a	a	a	h	-	h
*scaffold149_13217C	a	h	a	h	a	h	h	a	-	h	h	a	a	a	a	h	h	h	a	a	-	h	h	h	a	h	h	a	a	a	h	a	a	h	a	a	-	a	h	h	a	h	h	a	a	a	h	-	h
*scaffold149_13220C	a	h	a	h	a	h	h	a	-	h	h	a	a	a	a	h	h	h	a	a	-	h	h	h	a	h	h	a	a	a	h	a	a	h	a	a	-	a	h	h	a	h	h	a	a	a	h	-	h
*scaffold149_23095C	a	h	a	h	a	h	h	a	a	h	h	a	a	a	a	h	h	h	a	a	-	h	h	h	a	h	h	a	a	a	h	a	a	h	a	a	a	a	h	h	a	h	h	a	a	a	h	a	h
*scaffold149_302775C	a	h	a	h	a	h	h	a	a	h	h	a	a	a	a	h	h	h	a	a	a	h	h	h	a	h	h	a	a	a	h	a	a	h	a	a	a	a	h	h	a	h	h	a	a	a	h	a	h
*scaffold149_302794C	a	h	a	h	a	h	h	a	a	h	h	a	a	a	a	h	h	h	a	a	a	h	h	h	a	h	h	a	a	a	h	a	a	h	a	a	a	a	h	h	a	h	h	a	a	a	h	a	h
*scaffold149_302807C	a	h	a	-	a	h	h	a	a	h	h	a	a	a	a	h	h	h	a	a	a	-	h	h	a	h	h	a	a	a	-	a	a	h	a	a	a	a	-	h	a	h	h	a	a	a	h	a	h
*scaffold15_1106693	a	h	-	h	-	a	h	a	h	a	h	a	a	a	-	h	-	h	h	h	h	-	a	h	h	h	a	h	a	h	h	a	h	a	a	h	h	a	a	h	h	h	h	a	h	h	a	a	h
*scaffold15_1742826C	a	a	a	-	a	a	h	a	a	a	a	h	h	a	-	h	a	a	a	a	h	a	h	h	a	a	h	a	a	a	a	h	a	a	-	a	a	-	a	h	h	a	a	a	h	h	h	a	a
*scaffold15_2018237	a	a	a	h	a	a	h	a	a	a	a	h	h	a	h	h	a	a	a	-	h	-	h	h	a	a	h	a	a	a	-	h	a	a	h	a	a	h	-	h	h	a	a	a	h	h	h	a	a
*scaffold15_2018240	a	a	a	h	a	a	h	a	a	a	a	h	h	a	h	h	a	a	a	-	h	-	h	h	a	a	h	a	a	a	-	h	a	a	h	a	a	h	-	h	h	a	a	a	h	h	h	a	a
*scaffold15_2052108C	a	a	a	-	a	a	h	a	a	a	a	h	h	a	-	h	a	a	a	a	h	a	h	h	a	a	h	a	a	a	a	h	a	a	h	a	a	-	a	h	h	a	a	a	h	h	h	a	a
*scaffold15_2052252	a	a	a	h	a	a	a	h	a	-	h	h	h	h	a	a	-	a	h	h	a	h	a	h	h	h	a	h	a	-	-	h	a	h	h	h	h	-	h	a	-	a	h	a	h	a	a	a	h
*scaffold15_2268261C	a	a	a	-	a	a	h	a	a	a	a	a	a	a	-	h	a	a	a	a	h	a	h	h	a	a	h	a	a	a	a	h	a	a	h	a	a	h	a	h	h	a	a	a	h	h	h	a	a
*scaffold15_880563	a	h	a	h	a	a	h	a	h	a	h	a	a	a	a	h	a	h	h	h	h	-	-	h	h	h	a	h	a	h	h	h	h	a	a	h	h	-	-	h	h	h	h	a	h	h	a	a	h
*scaffold15_880576	a	h	a	h	a	a	h	a	h	a	h	a	a	a	a	h	a	h	h	h	h	a	a	h	h	h	a	h	a	h	h	h	h	a	a	h	h	-	-	h	h	h	h	a	h	h	a	a	h
*scaffold15_880577C	a	h	a	h	a	a	h	a	h	a	h	a	a	a	a	h	a	h	h	-	h	a	a	h	h	h	a	h	a	h	-	a	h	a	a	h	h	a	a	h	h	-	h	a	h	h	a	a	h
*scaffold15_983041C	a	h	a	-	a	a	h	a	h	a	h	a	a	a	a	h	a	h	h	-	h	a	a	h	-	h	a	h	a	h	-	a	h	a	a	h	h	a	a	h	h	h	h	a	h	h	a	a	h
*scaffold150_110538	a	a	h	-	h	h	a	a	a	h	h	a	a	a	a	a	a	-	a	h	h	h	h	a	h	a	h	h	a	h	h	a	a	h	h	-	a	h	h	a	h	h	h	h	h	h	h	a	h
*scaffold150_114010C	h	a	-	a	a	a	a	a	h	h	a	a	-	a	-	a	a	a	h	a	a	a	a	a	a	a	-	h	h	h	-	h	a	h	h	h	h	a	h	a	a	h	h	h	h	h	a	h	h
*scaffold150_321779	a	a	h	-	h	h	a	a	a	h	h	a	a	a	a	a	a	a	a	h	h	h	h	a	h	a	h	-	a	h	h	h	a	h	h	a	a	h	h	a	h	h	h	h	-	h	h	a	h
*scaffold150_534180	a	a	h	-	h	h	a	a	a	h	h	a	-	a	a	a	a	-	a	h	h	h	h	a	h	a	h	h	a	h	h	a	a	h	h	a	a	h	h	a	h	h	h	h	h	h	h	a	h
*scaffold150_544474	a	a	h	-	h	h	a	a	a	h	h	a	a	a	a	a	a	a	a	h	h	h	h	a	h	a	h	-	a	h	h	a	a	h	h	a	a	h	h	a	h	h	h	h	h	h	h	a	h
*scaffold151_156258	h	a	h	a	a	a	a	a	a	a	a	h	h	h	-	a	a	h	h	h	a	a	h	h	a	a	a	h	a	a	-	h	h	h	a	h	h	h	h	h	a	h	a	a	a	a	a	h	h
*scaffold151_156404C	h	a	h	a	a	a	a	a	a	a	a	h	h	h	a	a	a	h	h	-	a	a	h	h	a	a	a	h	a	a	a	-	h	h	a	h	h	h	h	h	a	h	a	a	a	a	a	h	h
*scaffold151_198736C	h	a	-	a	a	a	a	a	-	a	a	h	h	h	a	a	a	h	h	-	h	a	h	h	a	a	a	h	a	a	a	h	h	h	a	h	h	h	h	h	a	h	a	a	a	a	a	h	h
*scaffold151_198778	h	a	h	-	-	a	a	a	a	a	a	h	h	h	a	a	a	h	h	h	h	-	h	h	a	a	a	-	a	a	a	h	h	h	a	h	-	h	h	h	a	h	a	a	a	a	a	h	h
*scaffold151_201828C	h	a	h	a	a	a	a	a	a	a	a	h	h	h	a	-	a	h	h	a	h	a	h	h	a	a	-	h	a	a	a	h	h	h	-	h	h	h	-	h	a	h	a	-	a	a	a	h	h
*scaffold151_208222C	h	-	h	a	a	a	a	a	a	a	a	h	h	h	a	a	a	h	h	-	h	-	h	h	a	a	a	h	a	-	a	h	h	h	a	h	h	h	h	h	a	h	a	a	a	a	a	h	h
*scaffold151_208240	h	a	h	a	a	a	a	a	a	a	a	h	h	h	a	a	a	h	h	h	h	a	h	h	a	a	a	h	a	a	a	h	h	h	a	h	h	h	h	h	a	h	a	a	a	a	a	h	h
*scaffold151_335526	h	a	h	-	a	a	a	a	a	-	a	h	h	h	a	a	a	h	h	h	h	-	h	h	a	a	-	h	a	-	-	h	h	h	a	h	h	h	h	h	a	h	a	a	a	a	a	h	h
*scaffold151_397470	h	a	h	-	a	a	a	a	a	a	a	h	h	h	a	a	a	h	h	h	h	-	h	h	a	a	a	h	a	a	a	h	h	h	a	h	h	h	h	h	a	h	a	a	a	a	a	h	h
*scaffold151_397568C	h	a	h	a	a	a	a	a	a	a	a	h	h	h	a	a	a	-	h	-	h	a	h	h	a	a	a	h	a	a	a	h	h	h	a	h	h	h	h	h	a	h	a	a	a	a	a	h	h
*scaffold151_58616C	h	a	-	a	a	-	a	a	-	a	a	h	-	h	a	a	a	-	-	-	a	a	h	h	a	a	a	h	a	a	a	h	h	h	a	h	h	h	h	h	a	h	a	a	a	a	a	h	h
*scaffold151_58882C	h	a	-	a	a	a	a	a	-	a	a	h	-	h	a	a	a	-	h	-	a	a	h	h	a	a	a	h	a	a	a	h	h	h	a	-	h	h	h	h	h	h	a	a	-	-	a	h	h
*scaffold151_589367	h	a	h	-	-	a	a	a	a	a	a	h	h	h	a	a	a	h	h	h	h	-	h	h	a	a	a	h	a	a	h	h	h	h	-	h	h	h	h	h	a	h	a	a	a	a	a	h	h
*scaffold151_784412C	h	a	-	a	a	a	a	a	a	a	a	h	h	h	a	a	a	-	-	-	h	a	h	h	a	a	a	h	a	a	h	h	h	h	a	h	h	h	h	h	a	h	a	a	a	a	a	h	h
*scaffold151_784414C	h	a	-	a	a	a	a	a	a	a	a	h	-	-	a	a	a	-	h	-	h	a	h	h	a	a	a	h	a	a	h	h	h	h	a	h	h	h	h	h	a	h	a	a	a	a	a	h	h
*scaffold152_196374	a	h	h	h	-	a	a	a	a	h	a	h	h	h	h	h	h	h	a	-	a	h	h	h	h	h	h	a	h	a	h	h	h	a	a	a	a	h	a	h	a	h	a	h	a	a	h	h	a
*scaffold152_214235C	a	h	h	-	a	a	a	a	a	h	a	h	h	h	-	h	h	-	a	a	a	-	h	h	h	h	-	a	h	a	h	h	h	a	a	a	a	-	a	h	a	h	a	h	a	a	h	h	a
*scaffold152_217822	a	h	h	h	a	a	a	a	a	h	a	h	h	h	h	h	h	h	a	-	a	h	h	h	h	h	h	a	h	a	h	h	h	a	-	a	a	h	a	h	a	h	a	h	a	a	h	h	a
*scaffold152_698225C	a	h	h	-	a	a	a	a	a	h	a	h	h	h	h	h	h	h	a	a	a	-	a	h	h	h	h	a	h	a	-	h	h	a	a	a	a	-	a	h	a	h	a	h	a	a	h	h	a
*scaffold152_757952	a	h	h	h	a	a	a	a	a	h	a	h	h	h	h	h	h	h	a	-	a	h	a	h	h	h	h	a	h	a	h	h	h	a	-	-	a	h	a	h	a	h	a	h	a	a	h	h	a
*scaffold154_825452C	a	h	h	h	h	h	h	a	a	-	a	a	a	h	h	a	h	a	a	a	h	h	h	a	-	a	h	h	a	a	a	a	a	a	h	a	a	-	a	h	a	a	h	h	a	a	h	h	a
*scaffold154_825781	a	h	h	h	h	h	h	a	a	a	a	a	a	h	h	a	h	a	a	a	h	h	h	a	a	a	h	h	a	a	a	a	a	a	h	a	a	h	a	h	a	a	h	h	a	a	h	h	a
*scaffold154_825782	a	h	h	h	h	h	h	a	a	a	a	a	a	h	h	a	h	a	a	a	h	h	h	a	a	a	h	h	a	a	a	a	a	a	h	a	a	h	a	h	a	a	h	h	a	a	h	h	a
*scaffold155_268518C	h	a	a	h	a	h	a	h	a	-	h	a	a	a	a	a	h	h	h	a	-	a	h	a	a	h	h	a	h	a	a	a	a	a	h	a	h	a	a	h	a	h	h	a	a	h	h	h	a
*scaffold155_268638	h	a	a	h	a	h	a	h	a	h	-	a	a	a	a	a	h	h	-	-	a	a	-	a	a	h	h	a	h	a	-	h	a	a	h	a	h	a	a	h	a	h	h	a	a	h	h	h	a
*scaffold155_268649	h	a	a	h	a	h	a	h	a	h	-	a	a	a	a	a	h	h	-	-	a	a	-	a	a	h	h	a	h	a	-	h	a	a	h	a	h	a	a	h	a	h	h	a	a	h	h	h	a
*scaffold155_872458C	h	a	a	-	a	h	a	h	a	h	h	a	a	a	a	a	-	-	h	a	a	a	h	a	a	h	h	a	h	a	-	a	a	a	h	a	h	a	a	h	a	h	h	h	a	h	h	h	a
*scaffold156_616914C	a	h	a	-	h	h	a	a	a	a	a	h	h	h	a	h	h	a	-	-	h	a	a	a	a	h	a	a	a	h	a	h	a	a	a	a	h	-	-	a	h	a	h	h	-	h	a	a	a
*scaffold156_616929C	a	h	a	-	h	h	a	a	a	a	a	h	h	h	a	h	h	a	-	-	h	a	a	a	a	h	a	a	a	h	a	h	a	a	a	a	h	-	-	a	h	a	h	h	-	h	a	a	a
*scaffold157_258437C	h	h	a	a	h	a	h	a	h	h	a	-	-	h	h	h	h	a	h	h	a	h	a	h	h	a	a	a	h	h	h	a	h	h	-	a	h	h	h	h	h	a	a	h	a	a	h	a	h
*scaffold157_258448C	h	h	a	a	h	a	h	a	h	h	a	a	a	h	h	h	h	a	h	a	a	-	a	h	h	a	a	a	-	h	h	a	h	h	-	a	h	h	h	h	h	a	a	h	a	a	h	a	h
*scaffold157_258634C	h	h	a	a	h	a	h	a	h	h	a	-	a	h	h	h	h	a	h	a	a	h	a	h	h	a	a	a	-	h	h	a	h	h	-	a	h	h	h	h	h	a	a	h	a	a	h	a	h
*scaffold157_800637	h	h	a	a	h	h	h	a	h	h	a	a	a	h	h	h	h	a	h	a	a	h	a	h	h	a	a	a	h	h	h	a	h	h	h	a	h	h	h	h	h	a	a	h	a	a	h	a	h
*scaffold157_829668C	h	h	a	a	h	h	h	a	h	h	a	a	a	h	h	h	h	a	-	a	a	h	a	h	h	a	a	a	h	h	-	a	h	h	-	a	h	-	-	h	h	a	a	h	a	a	h	a	h
*scaffold157_831031	h	h	a	a	h	h	h	a	h	h	a	a	a	h	h	h	h	a	h	-	a	h	-	h	h	a	-	a	h	h	h	a	h	h	h	a	h	h	h	h	h	a	a	h	a	a	h	a	h
*scaffold157_831206C	h	h	a	a	-	h	h	a	h	-	a	a	a	h	-	h	h	a	h	a	a	-	a	h	h	a	a	a	h	h	-	a	h	h	h	a	h	-	-	h	h	a	a	h	a	a	h	a	h
*scaffold158_210560	a	-	a	h	a	h	h	a	a	h	h	a	a	a	a	h	h	h	a	-	a	h	h	h	a	h	h	h	a	a	h	a	a	h	a	a	a	a	h	h	a	h	h	a	a	a	h	a	-
*scaffold158_266181C	a	h	a	-	a	h	h	a	a	h	h	a	a	a	a	h	-	-	a	a	a	-	h	h	a	h	h	h	a	a	-	a	a	-	a	a	a	a	-	h	a	h	h	a	a	a	h	a	h
*scaffold158_664826C	a	h	a	h	a	h	h	a	a	h	h	a	a	a	a	h	h	h	a	a	a	h	h	h	a	h	h	h	a	a	-	a	a	h	a	a	a	a	h	h	a	h	h	a	a	a	h	a	h
*scaffold158_665105	a	h	a	h	a	h	h	a	a	h	h	a	a	a	a	h	h	h	a	-	a	h	h	h	-	h	h	h	a	-	h	a	a	h	-	a	a	-	h	h	-	h	h	a	a	-	h	a	h
*scaffold159_375214	-	h	-	-	h	h	a	h	a	a	h	a	a	h	a	a	h	h	-	h	a	h	h	a	a	a	h	a	a	h	-	a	h	a	h	h	a	-	-	h	a	-	a	a	h	h	a	a	a
*scaffold16_1026306C	a	h	a	a	-	h	h	a	h	h	h	a	a	a	a	a	a	a	a	-	h	a	a	h	a	h	h	h	a	a	a	a	a	a	-	h	a	a	-	a	h	a	a	a	h	a	h	h	a
*scaffold16_1033190	a	h	a	-	h	h	h	a	h	h	h	a	a	a	a	a	a	a	a	h	h	a	a	h	a	h	h	h	a	a	a	a	a	a	h	h	a	a	h	a	h	a	a	a	h	a	h	h	a
*scaffold16_1166539	a	h	a	a	h	h	h	a	h	h	h	a	a	a	a	a	a	a	a	h	h	-	a	h	a	h	h	h	a	a	-	a	a	a	h	h	a	a	h	a	h	a	a	a	h	a	h	h	a
*scaffold16_1185981	a	h	-	-	h	h	h	-	h	h	h	a	a	a	a	a	-	-	a	h	h	-	a	h	a	h	h	h	a	a	-	a	a	a	h	h	a	-	h	a	h	a	a	a	h	a	h	h	a
*scaffold16_1242079	a	h	-	-	h	a	h	a	h	h	h	a	-	-	-	a	-	-	a	h	h	-	a	h	a	h	h	h	a	a	a	-	a	a	h	h	a	-	h	a	h	a	a	a	h	a	h	h	a
*scaffold16_1308852C	a	h	a	a	h	a	h	a	h	h	h	a	a	a	a	a	a	a	a	-	h	a	a	h	a	h	h	h	a	a	a	a	a	a	h	h	a	a	-	a	h	a	a	a	h	a	h	h	a
*scaffold16_133615	a	h	a	-	h	h	h	a	h	h	h	a	a	a	a	a	a	a	a	h	h	a	a	h	a	h	h	h	a	-	a	a	a	a	h	h	a	-	h	a	h	a	a	a	h	a	h	h	a
*scaffold16_1348943C	a	h	a	a	h	a	h	a	h	h	h	a	a	a	a	a	a	a	a	h	h	a	a	h	a	h	h	h	a	a	a	a	a	a	h	h	a	a	h	a	h	a	a	a	h	a	h	h	a
*scaffold16_1433689C	a	h	a	a	-	a	h	a	h	-	-	a	a	a	a	a	a	a	a	-	h	a	a	h	a	h	h	h	a	a	a	a	a	a	h	h	a	a	h	a	h	a	a	a	h	a	h	h	a
*scaffold16_1643562	a	h	a	-	h	a	h	a	h	h	h	a	a	a	a	a	a	-	a	h	h	-	a	h	a	h	h	h	a	a	-	-	a	-	h	h	a	-	h	a	h	-	a	a	h	a	h	h	a
*scaffold16_1643895	a	h	a	-	h	a	h	a	h	h	h	a	a	a	a	a	a	a	a	h	h	-	a	h	a	h	h	h	a	a	-	-	a	a	h	h	a	-	h	a	h	-	a	a	h	a	h	h	a
*scaffold16_1676684C	a	h	-	a	h	a	h	a	h	h	h	a	-	a	a	a	a	a	a	-	h	a	a	h	a	h	h	h	a	a	a	a	a	a	h	h	a	a	h	a	-	a	a	a	h	a	-	h	a
*scaffold16_1688150C	a	h	a	a	h	a	h	a	h	h	h	a	a	a	a	a	a	a	a	-	h	a	a	h	a	h	h	h	a	a	a	a	a	a	h	h	a	a	h	a	h	a	a	a	h	a	h	h	a
*scaffold16_1777497C	a	h	a	a	-	a	h	a	h	h	h	a	a	a	a	a	a	a	a	-	h	a	a	h	a	h	h	h	a	a	a	a	a	a	h	-	a	a	-	a	h	a	a	a	h	a	h	-	a
*scaffold16_1942137C	a	h	a	a	h	a	h	a	h	h	h	a	a	a	a	a	a	a	a	-	h	a	-	h	a	h	h	h	a	a	a	a	a	a	h	h	a	h	-	a	h	a	a	a	h	a	h	h	a
*scaffold16_1942374C	a	h	a	a	h	a	h	a	h	-	h	a	a	a	a	a	a	a	a	-	h	a	a	h	a	h	h	h	a	a	a	a	a	a	-	h	a	-	h	a	h	a	a	a	-	a	-	h	a
*scaffold16_2099842	a	h	a	-	h	a	h	a	h	h	h	-	a	a	-	a	a	-	a	h	h	-	a	h	a	h	h	h	a	a	-	a	a	a	h	h	a	h	h	a	h	-	a	a	h	a	h	-	a
*scaffold16_2099870C	a	h	a	a	h	a	h	a	h	h	h	a	-	a	a	a	a	a	a	-	h	a	a	h	a	h	h	h	-	-	a	a	a	a	h	-	a	h	h	a	h	a	a	a	h	a	h	h	a
*scaffold16_2189212C	a	h	a	a	-	a	-	a	h	-	-	a	a	a	a	a	a	a	a	a	h	a	a	h	a	h	h	h	a	a	a	a	a	a	h	h	a	-	-	a	h	a	a	a	h	a	h	h	a
*scaffold16_2221629	a	h	a	a	h	a	h	a	h	h	h	a	a	a	a	a	a	a	a	h	h	-	a	h	a	h	h	h	a	a	-	a	a	a	h	h	a	h	h	a	h	a	a	a	h	a	h	h	a
*scaffold16_2275404C	a	h	a	a	h	a	h	a	h	h	h	a	a	a	a	a	a	a	a	a	h	a	a	h	a	h	h	h	a	a	a	a	a	a	h	h	a	h	h	a	h	a	a	a	h	a	h	h	a
*scaffold16_2275905	a	h	-	-	-	a	h	a	h	h	h	a	a	a	-	a	a	a	a	h	h	a	a	h	a	h	h	h	a	a	a	a	a	a	h	h	a	h	h	a	h	a	a	a	h	a	h	h	a
*scaffold16_2327892	a	a	a	h	h	a	a	h	a	h	a	h	h	-	-	h	h	h	h	h	h	-	a	a	a	h	a	a	-	h	h	h	a	a	-	h	h	h	-	a	a	a	h	h	a	a	h	h	h
*scaffold16_254377	a	h	a	-	h	h	h	a	h	h	h	a	a	a	a	a	a	a	a	h	h	a	a	h	a	h	h	h	a	a	-	a	a	a	h	h	a	-	h	a	h	a	a	a	h	a	h	h	a
*scaffold16_254525	-	h	a	-	h	h	h	a	h	h	h	a	a	a	a	a	a	a	a	h	h	a	a	h	a	h	h	h	a	a	-	a	a	a	h	h	a	-	h	a	h	a	a	a	h	a	h	h	a
*scaffold16_314745C	a	h	a	a	h	h	h	a	h	h	h	a	a	a	a	a	a	a	a	-	h	a	a	h	a	h	h	h	a	a	a	a	a	a	h	h	a	a	h	a	h	a	a	a	h	a	h	h	a
*scaffold16_314854	a	h	a	-	h	h	h	a	h	h	h	a	a	a	a	a	a	a	a	h	h	-	a	h	a	h	h	h	a	a	a	-	a	a	h	h	a	a	h	a	h	a	a	a	h	a	h	h	a
*scaffold16_328838C	-	h	a	a	h	h	h	a	h	h	h	a	a	a	a	a	a	a	a	-	h	a	a	h	a	h	h	h	a	-	a	a	a	a	h	h	a	a	-	a	h	a	a	a	h	a	h	h	a
*scaffold16_328840C	-	h	a	a	h	h	h	a	h	h	h	a	a	a	a	a	a	a	a	-	h	a	a	h	a	h	h	h	a	-	a	a	a	a	h	h	a	a	-	a	h	a	a	a	h	a	h	h	a
*scaffold16_328906	a	h	-	-	h	h	h	a	h	h	h	a	-	a	-	a	a	-	a	h	h	-	a	h	a	h	h	h	a	a	a	a	a	a	h	h	a	a	h	a	h	a	a	a	h	a	h	h	a
*scaffold16_348190	a	h	a	-	h	h	h	a	h	h	h	a	a	-	-	a	a	a	-	h	h	-	a	h	a	h	h	h	a	a	-	a	a	a	h	h	a	-	h	a	h	a	a	a	h	a	h	h	a
*scaffold16_387650C	a	h	a	a	-	h	h	a	h	h	-	a	a	a	a	a	a	a	a	-	h	a	a	h	a	h	h	h	a	a	a	a	a	a	h	h	a	a	h	a	h	a	a	a	h	a	h	h	a
*scaffold16_387712C	a	h	a	a	-	h	h	a	h	h	-	a	a	a	a	a	a	a	a	-	h	a	a	h	a	h	h	h	a	a	a	a	a	a	h	h	a	a	h	a	h	a	a	a	h	a	h	h	a
*scaffold16_856180C	a	h	a	a	h	h	h	a	h	h	h	a	a	a	a	a	a	a	a	h	h	a	a	h	a	h	h	h	a	a	a	a	a	a	h	h	a	a	h	a	h	a	a	a	h	a	h	h	a
*scaffold16_929293	a	h	a	-	h	h	h	a	h	h	h	a	a	a	a	a	a	a	a	h	h	-	a	h	a	h	h	h	a	a	-	-	a	a	h	h	a	-	h	a	h	-	a	a	h	a	h	h	a
*scaffold16_955847	a	h	a	-	h	h	h	a	h	h	h	a	a	a	a	a	a	-	a	h	h	-	a	h	a	h	h	h	a	a	a	a	a	a	h	h	a	a	h	a	h	-	a	a	h	a	h	h	a
*scaffold16_990588C	a	h	a	a	-	h	h	a	h	h	h	a	a	a	a	a	a	a	a	-	h	a	a	h	a	h	h	h	a	a	a	a	a	a	h	h	a	a	h	a	h	a	a	a	h	a	h	h	a
*scaffold16_990598	a	h	-	-	h	h	h	-	h	h	h	a	-	a	-	a	a	-	a	h	h	a	a	h	a	h	h	h	a	a	a	a	a	a	h	h	a	a	h	a	h	a	a	a	h	a	h	h	a
*scaffold160_362884C	h	a	h	-	h	h	a	h	a	a	a	h	h	a	-	a	h	h	h	a	h	a	h	h	a	h	a	a	a	-	a	a	h	h	h	a	h	-	h	a	h	a	a	a	h	a	h	h	a
*scaffold160_393996C	h	a	h	h	h	h	a	h	-	a	a	h	h	a	-	a	h	h	h	a	h	a	h	h	a	h	a	a	a	h	a	a	h	h	h	a	h	h	h	a	h	a	a	a	h	a	h	h	a
*scaffold160_425172	h	a	h	h	h	h	a	h	a	a	a	h	h	a	h	a	h	h	h	a	h	-	h	h	a	h	a	a	a	h	a	-	h	h	h	a	h	h	h	a	h	a	a	a	h	a	h	h	a
*scaffold160_490923	h	a	h	h	h	h	a	h	a	a	a	h	h	a	h	a	h	h	h	h	h	-	h	h	a	h	a	a	a	h	-	a	h	h	h	a	h	h	h	a	h	a	a	a	h	a	h	h	a
*scaffold160_612361	h	a	h	h	h	h	a	h	a	a	a	h	h	a	h	a	h	h	h	-	h	-	h	h	a	h	a	a	a	h	-	a	-	-	h	a	h	h	h	a	-	a	a	a	h	a	h	h	a
*scaffold161_566358	a	a	h	-	h	a	h	a	h	h	a	h	h	a	h	a	-	a	a	-	h	-	h	a	a	a	h	h	h	h	h	h	h	h	h	h	a	-	h	a	a	h	h	-	a	h	a	a	h
*scaffold161_659839	a	a	h	-	h	a	h	a	h	h	a	h	h	a	h	a	a	a	a	a	h	-	h	a	a	a	h	h	h	h	h	h	h	h	h	h	a	-	h	a	a	h	h	h	a	h	a	a	h
*scaffold161_731724C	a	a	h	a	h	a	h	a	h	h	a	h	h	a	h	a	a	a	a	a	h	a	h	a	a	a	h	h	h	h	h	h	h	h	h	h	a	a	h	a	a	a	h	h	a	h	a	a	h
*scaffold161_73279	a	a	h	-	h	a	h	a	h	h	a	h	h	a	h	a	a	a	a	h	h	-	h	a	a	a	h	h	h	h	h	h	h	h	h	h	a	-	h	a	a	h	h	h	a	h	a	a	h
*scaffold162_595000	a	a	h	h	a	a	h	a	a	a	h	a	a	h	h	h	h	a	h	-	a	a	a	h	h	h	h	a	a	-	-	a	h	a	h	h	h	-	h	a	a	a	h	a	h	h	a	a	a
*scaffold162_595001C	a	-	h	-	a	a	h	a	a	a	h	a	a	h	h	h	h	a	h	a	a	a	a	h	h	h	h	a	a	a	a	a	h	a	h	h	h	a	h	a	a	a	h	a	h	h	a	a	a
*scaffold162_595016	a	a	h	h	a	a	h	a	a	a	h	a	a	h	h	h	h	a	h	-	a	a	a	h	h	h	h	a	a	-	-	a	h	a	h	h	h	-	h	a	a	a	h	a	h	h	a	a	a
*scaffold163_101824	-	h	a	-	h	h	h	a	a	h	-	a	a	h	-	a	-	-	a	-	h	h	h	a	a	a	a	a	a	h	-	a	h	a	h	a	a	-	a	a	h	h	h	a	a	h	h	a	h
*scaffold163_156183	a	h	h	h	h	a	a	a	a	h	-	h	h	-	h	-	h	h	a	-	h	h	a	a	h	a	h	h	a	a	h	a	a	a	a	a	a	-	h	h	h	a	a	h	a	h	h	a	a
*scaffold163_527721	a	h	-	-	h	h	h	a	a	h	a	a	a	h	-	a	-	-	a	h	h	h	h	a	a	a	a	a	a	h	a	a	h	a	h	a	a	a	a	a	h	h	h	a	a	h	h	a	h
*scaffold163_668308	h	a	h	h	-	h	a	h	h	h	a	a	-	h	h	h	a	h	a	-	h	h	h	h	a	h	h	a	a	h	-	h	a	a	h	-	a	-	h	h	a	h	a	a	h	h	a	a	a
*scaffold164_296003	a	h	h	h	h	a	a	a	a	h	a	h	h	a	h	h	h	h	a	-	a	h	a	h	h	h	h	a	h	a	h	h	a	a	a	a	a	h	h	h	a	h	a	h	a	a	h	h	a
*scaffold164_296160C	h	h	h	a	a	h	a	h	a	a	h	a	a	a	h	a	h	a	-	a	-	h	h	-	a	h	a	-	h	a	a	h	-	a	-	h	h	a	a	a	a	h	a	h	h	h	a	a	a
*scaffold164_762975C	a	h	h	-	a	a	a	a	a	h	a	h	h	a	h	h	h	h	a	a	a	-	a	h	h	h	h	a	h	a	h	h	a	a	a	a	a	h	h	h	a	h	a	h	a	a	h	h	a
*scaffold164_762987	a	h	h	h	-	a	a	a	a	h	a	h	h	a	h	h	h	h	a	h	a	h	a	h	h	h	h	a	h	-	h	h	a	a	-	a	a	h	h	h	a	h	a	h	a	a	h	h	a
*scaffold165_43242	a	h	h	h	h	a	a	h	h	-	h	a	a	h	h	a	a	h	a	-	h	-	h	a	a	a	h	h	h	a	h	a	h	h	a	a	a	h	h	a	a	-	h	a	a	h	a	h	h
*scaffold165_43268C	a	h	h	h	-	a	a	h	h	a	h	a	a	h	h	a	a	-	a	a	h	a	h	a	a	a	h	h	h	a	-	a	h	h	a	a	a	-	h	a	a	a	-	a	a	h	a	h	h
*scaffold165_43280C	a	h	h	h	-	a	a	h	h	a	h	a	a	h	-	a	a	-	a	a	h	a	h	a	a	a	-	h	h	a	-	a	h	h	a	a	a	-	h	a	a	a	h	a	a	h	a	h	h
*scaffold165_68776C	a	h	-	-	-	a	a	h	h	a	h	a	a	-	-	a	a	h	a	a	h	a	h	a	a	a	-	h	h	a	-	a	h	h	a	a	a	-	h	a	a	a	h	a	a	h	a	h	h
*scaffold167_430213	a	h	a	h	a	a	a	a	h	h	h	a	a	-	-	h	a	-	h	h	a	-	h	h	a	h	-	h	a	h	h	a	h	a	a	h	h	-	a	h	h	h	h	a	h	h	a	h	h
*scaffold167_430244	a	h	a	h	a	a	a	a	h	h	h	a	a	-	-	h	a	-	h	h	a	-	h	h	a	h	-	h	a	h	h	a	h	a	a	h	h	-	a	h	h	h	h	a	h	h	a	h	h
*scaffold167_640410	a	h	a	h	a	a	a	a	h	h	h	a	a	a	a	h	a	a	h	-	a	a	h	h	a	h	a	h	a	h	h	h	h	-	a	h	h	-	-	h	h	h	h	a	h	h	a	h	h
*scaffold168_225172	h	a	h	-	a	a	a	a	h	h	a	a	a	a	h	a	a	a	h	h	a	-	a	a	a	a	h	h	h	h	h	h	-	h	h	h	h	-	h	a	a	h	h	h	h	h	a	h	h
*scaffold168_397749C	h	a	h	a	a	a	a	a	h	-	a	a	a	a	-	a	a	a	h	a	a	a	a	a	a	a	h	h	h	h	-	-	a	h	h	-	h	a	-	a	a	h	h	h	h	h	a	h	h
*scaffold168_569637C	h	a	-	a	a	a	a	a	h	h	a	a	a	a	-	a	a	a	h	-	a	a	a	a	a	a	h	h	h	h	-	h	a	h	h	h	h	a	-	a	a	h	h	h	h	h	a	h	h
*scaffold168_569676	h	a	h	-	a	a	a	a	h	h	a	a	a	a	h	a	-	-	h	h	a	-	a	a	a	a	h	h	h	h	h	h	a	h	h	h	h	a	h	a	a	h	h	h	h	h	a	h	h
*scaffold168_569718C	h	a	-	a	a	a	a	a	h	h	a	a	a	a	-	a	a	a	h	-	a	a	a	a	a	a	h	h	h	h	-	h	a	h	-	-	h	a	-	a	a	h	h	h	h	h	a	h	h
*scaffold168_572481	h	a	h	a	a	a	a	a	h	h	a	a	a	a	h	a	a	a	h	h	a	a	a	a	a	a	h	h	h	h	h	h	a	h	h	h	h	a	h	a	a	h	h	h	h	h	a	h	h
*scaffold168_759760C	h	a	h	a	a	a	a	a	h	h	a	a	a	a	h	a	a	a	h	h	a	a	a	a	a	a	h	h	h	h	h	h	a	h	h	h	h	a	h	a	a	h	h	h	h	h	a	h	h
*scaffold169_407710	a	a	a	h	a	a	a	a	h	a	-	h	h	h	a	a	h	a	a	h	a	h	a	h	a	a	a	h	h	h	a	h	h	h	a	a	a	h	h	a	a	a	h	a	-	a	a	h	h
*scaffold169_558680C	a	a	a	h	a	a	a	a	h	a	h	h	h	h	a	a	h	a	a	h	a	h	a	h	a	a	a	h	h	h	a	h	h	h	a	a	a	h	-	a	a	a	h	a	h	a	a	h	h
*scaffold169_593428	a	a	a	h	-	a	a	a	h	a	h	h	h	h	-	a	h	-	a	h	a	h	a	h	a	a	a	h	h	h	a	h	h	h	a	a	a	h	h	a	a	-	h	a	h	a	a	h	h
*scaffold169_714286	a	a	-	h	-	a	a	a	h	-	h	h	h	h	-	a	h	-	a	h	a	h	a	h	a	a	a	h	h	h	-	h	h	h	a	-	a	h	h	a	a	a	h	a	h	a	-	h	h
*scaffold169_780609	a	a	a	h	-	a	a	a	h	a	h	h	h	h	a	a	h	a	a	h	a	h	a	h	a	a	a	h	h	h	a	h	h	h	a	a	a	h	h	a	a	a	h	a	h	a	a	h	h
*scaffold169_786900	a	a	-	h	-	a	a	a	h	a	h	h	h	h	-	a	h	-	a	h	a	h	a	h	a	a	a	h	h	h	-	h	h	h	-	a	a	h	h	a	a	a	h	a	h	a	a	h	h
*scaffold169_83950	a	a	-	h	a	a	a	a	h	a	h	h	h	h	a	a	h	a	a	h	a	h	a	h	a	a	a	h	h	h	-	h	h	h	a	a	a	h	h	a	a	a	h	a	h	a	a	h	h
*scaffold17_1404923C	h	h	h	h	h	h	a	a	a	a	a	a	a	h	a	h	h	a	a	a	h	a	a	a	a	a	a	h	a	h	a	h	h	a	a	a	a	h	h	a	h	a	h	a	h	h	a	a	a
*scaffold17_1539286C	-	h	h	-	h	h	a	a	a	a	a	a	a	h	a	h	h	a	a	a	h	a	a	h	a	a	a	h	a	h	a	h	h	a	a	a	a	-	h	a	h	a	h	a	h	h	a	a	a
*scaffold17_1563657	h	h	h	h	h	h	a	-	a	-	-	a	a	h	a	h	h	a	a	-	h	-	a	h	a	a	a	h	a	h	-	h	h	a	a	a	a	h	h	a	h	a	h	a	h	h	a	a	a
*scaffold17_1619790C	h	h	h	-	h	h	a	a	a	a	a	a	a	h	a	h	h	a	a	a	h	a	a	h	a	a	a	h	a	-	a	h	h	a	a	a	a	h	-	a	h	a	h	a	h	h	a	a	a
*scaffold17_1619798	h	h	h	h	h	h	a	a	a	a	a	a	a	h	a	h	h	a	a	-	h	-	a	h	a	a	a	h	a	h	a	h	h	a	a	a	a	h	h	a	h	a	h	a	h	h	a	a	a
*scaffold17_1619854	h	h	h	h	h	h	a	a	a	a	a	a	a	h	a	h	h	a	a	-	h	-	a	h	a	a	a	h	a	h	a	h	h	a	a	a	a	h	h	a	h	a	h	a	h	h	a	a	a
*scaffold17_1619876	h	h	h	h	h	h	a	a	a	a	a	a	a	h	a	h	h	a	a	-	h	-	a	h	a	a	a	h	a	h	a	h	h	a	a	a	a	h	h	a	h	a	h	a	h	h	a	a	a
*scaffold17_1819166	h	h	h	h	h	h	a	a	a	a	a	a	a	h	a	h	h	a	a	-	h	-	a	h	-	a	a	h	a	h	h	h	h	a	a	a	a	h	h	h	h	a	h	a	h	h	a	a	a
*scaffold17_1925757C	h	h	h	-	h	h	a	a	a	a	a	a	a	h	a	h	h	a	a	a	h	a	a	h	a	a	a	h	a	h	h	h	h	a	a	a	a	h	h	h	h	a	h	a	h	h	a	a	a
*scaffold17_1995455C	h	h	h	-	-	h	a	a	a	a	a	a	a	h	a	h	-	a	a	a	h	a	a	h	a	a	a	h	a	h	h	h	h	a	a	a	a	h	h	h	h	a	h	a	h	h	a	a	a
*scaffold17_1995546C	h	h	h	h	-	h	a	a	-	a	a	a	a	h	a	h	-	a	a	a	h	a	a	h	a	-	a	h	a	h	h	h	h	a	a	a	a	h	h	h	h	a	h	a	h	h	a	a	a
*scaffold17_2002327	h	h	h	h	h	h	a	a	a	a	a	a	a	h	a	h	h	a	a	-	h	a	-	h	a	a	a	h	a	h	h	h	h	a	a	-	a	h	h	h	h	-	h	a	h	h	a	-	a
*scaffold17_2002328	h	h	h	h	h	h	a	a	a	a	a	a	a	h	a	h	h	a	a	-	h	a	-	h	a	a	a	h	a	h	h	h	h	a	a	-	a	h	h	h	h	-	h	a	h	h	a	-	a
*scaffold17_2313108	h	h	h	h	h	h	a	a	a	-	a	a	a	h	a	h	h	a	a	-	h	-	a	h	a	a	a	h	a	h	h	h	h	a	a	a	a	h	h	h	h	a	h	a	h	h	a	a	a
*scaffold17_2316456C	h	h	h	-	-	h	a	a	a	a	a	a	a	-	a	h	-	a	a	a	h	a	a	h	a	a	a	h	a	h	h	h	h	a	a	a	a	-	-	h	h	a	h	a	h	h	a	a	a
*scaffold17_2361369	h	h	h	h	h	h	a	a	a	a	a	a	a	h	-	h	h	-	a	-	h	-	a	h	a	a	a	h	a	h	h	h	h	a	a	a	a	h	h	h	h	-	h	a	h	h	a	a	a
*scaffold17_33321	h	h	h	h	h	h	a	a	a	a	a	a	-	h	a	h	h	-	a	-	h	-	a	a	a	a	a	h	a	h	-	h	h	a	a	a	a	h	h	a	h	a	h	a	h	h	a	a	a
*scaffold17_538389C	h	h	h	h	h	h	a	a	a	a	a	a	a	h	a	h	h	a	a	a	h	a	a	a	a	a	a	h	a	h	a	h	h	a	a	a	a	-	h	a	h	a	h	a	h	h	a	a	a
*scaffold17_538420C	h	h	h	h	h	h	a	a	a	a	a	a	a	h	a	h	h	a	a	a	h	a	a	a	a	a	a	h	a	h	a	h	h	a	a	a	a	h	h	a	h	a	h	a	h	h	a	a	a
*scaffold17_568833	h	h	h	h	h	h	a	a	a	a	a	a	-	h	-	h	h	a	a	-	h	-	a	a	a	a	a	h	a	h	-	h	h	a	a	a	a	h	h	a	h	a	h	a	h	h	a	a	a
*scaffold17_584971C	h	h	-	-	-	h	a	a	a	a	a	a	a	h	a	h	h	a	a	a	h	a	a	a	a	a	a	h	a	h	a	h	h	a	a	a	a	-	h	a	h	a	h	a	h	h	a	a	a
*scaffold17_772886C	h	h	-	-	h	h	a	a	a	a	a	a	a	-	a	h	-	a	a	a	-	a	a	a	a	a	a	h	a	h	a	h	h	a	a	a	a	h	-	a	h	a	h	a	h	h	a	a	a
*scaffold17_822257	h	h	h	h	h	h	a	a	a	a	a	a	a	h	a	h	h	a	a	-	h	-	a	a	a	a	a	h	a	h	a	h	h	a	a	a	a	h	h	a	h	a	h	a	h	h	a	a	a
*scaffold170_720781	a	a	h	-	h	h	a	a	a	h	h	a	a	a	-	a	a	a	a	-	a	h	h	a	h	a	a	h	a	h	h	a	a	-	h	a	a	h	h	a	h	h	h	h	h	h	h	a	h
*scaffold171_355948C	a	h	-	a	a	a	h	a	h	a	a	a	a	a	a	h	a	-	a	-	-	-	a	h	h	h	h	h	a	h	-	a	h	h	-	h	a	a	a	a	a	a	h	h	h	a	a	a	h
*scaffold171_405517C	a	h	h	a	a	a	h	-	h	a	a	a	a	a	a	h	a	h	a	h	h	-	a	h	h	h	-	h	a	h	-	a	h	h	h	h	a	a	a	a	a	a	h	h	h	a	a	a	h
*scaffold171_627255C	a	h	-	a	a	a	h	a	h	a	a	a	a	a	a	h	a	h	a	-	h	-	a	h	h	h	h	h	a	-	h	a	h	h	h	-	a	a	a	a	a	a	h	h	h	a	a	a	h
*scaffold171_654403C	a	h	h	a	a	a	h	a	h	a	a	a	a	a	a	h	a	h	a	-	h	h	a	h	h	h	h	h	h	h	-	a	h	h	-	h	a	a	a	a	a	a	h	h	h	a	a	a	h
*scaffold172_144771C	a	a	a	a	a	a	h	a	a	a	a	a	a	a	h	h	a	a	-	a	h	a	h	h	a	a	h	a	a	a	a	h	a	a	h	a	a	h	a	h	h	a	a	a	h	h	h	-	a
*scaffold172_144920	a	a	a	-	a	a	h	a	a	a	a	a	a	a	h	h	a	a	a	-	h	a	h	h	a	a	h	a	a	a	a	h	a	a	h	a	a	h	-	h	h	a	a	a	h	h	h	a	a
*scaffold172_180584	a	a	a	a	a	a	h	a	a	a	a	a	-	a	h	h	a	a	a	-	h	-	h	h	a	a	h	a	a	a	a	h	a	a	h	a	a	h	a	h	h	a	a	a	h	h	h	a	a
*scaffold172_180653C	a	a	a	a	a	a	h	a	a	a	a	a	a	-	h	h	a	a	a	a	h	a	h	h	a	-	h	a	a	a	a	h	a	a	h	a	a	h	a	h	h	a	-	a	h	h	h	a	a
*scaffold172_180658C	a	a	a	a	a	a	h	a	a	a	a	a	a	-	h	h	a	a	a	a	h	a	h	h	a	-	h	a	a	a	a	h	a	a	h	a	a	h	a	h	h	a	-	a	h	h	h	a	a
*scaffold172_180671C	a	a	a	a	a	a	h	a	a	a	a	a	a	-	h	h	a	a	a	a	h	a	h	h	a	-	h	a	a	a	a	h	a	a	h	a	a	h	a	h	h	a	-	a	h	h	h	a	a
*scaffold172_180675C	a	a	a	a	a	a	h	a	a	a	a	a	a	-	h	h	a	a	a	a	h	a	h	h	a	-	h	a	a	a	a	h	a	a	h	a	a	h	a	h	h	a	-	a	h	h	h	a	a
*scaffold172_277113	a	a	-	-	-	a	h	a	a	a	-	a	-	a	h	h	-	-	a	-	h	-	h	h	a	a	h	a	a	a	a	h	a	a	h	a	a	h	a	h	h	a	a	a	h	-	h	a	a
*scaffold172_277178	a	a	-	-	-	a	h	a	a	a	-	a	-	a	h	h	-	-	a	-	h	-	h	h	a	a	h	a	a	a	a	h	a	a	h	a	a	h	a	h	h	a	a	a	h	-	h	a	a
*scaffold172_277207	a	a	-	-	-	a	h	a	a	a	-	a	-	a	h	h	-	-	a	-	h	-	h	h	a	a	h	a	a	a	a	h	a	a	h	a	a	h	a	h	h	a	a	a	h	-	h	a	a
*scaffold172_277215	a	a	-	-	-	a	h	a	a	a	-	a	-	a	h	h	-	-	a	-	h	-	h	h	a	a	h	a	a	a	a	h	a	a	h	a	a	h	a	h	h	a	a	a	h	-	h	a	a
*scaffold172_298934	a	a	-	-	-	a	h	a	a	a	a	a	-	-	h	h	a	-	a	-	h	-	h	h	a	a	h	a	a	a	a	h	a	a	h	a	a	h	a	h	h	-	a	a	h	h	h	a	a
*scaffold172_298952	a	a	-	-	-	a	h	a	a	a	a	a	-	-	h	h	a	-	a	-	h	-	h	h	a	a	h	a	a	a	a	h	a	a	h	a	a	h	a	h	h	a	a	a	h	h	h	a	a
*scaffold172_414487	a	a	-	a	a	a	h	a	a	a	a	a	a	a	h	h	a	a	a	-	h	-	h	h	-	a	h	a	a	a	a	h	a	a	h	a	a	h	a	h	h	a	a	a	h	h	h	a	a
*scaffold172_524604	a	a	-	-	-	a	h	a	a	a	a	a	a	-	h	h	-	-	a	-	h	a	h	h	a	a	h	a	a	a	-	h	a	a	h	a	a	h	a	h	h	a	a	a	h	h	h	a	a
*scaffold172_524615	a	a	-	-	-	a	h	a	a	a	a	a	a	-	h	h	-	-	a	-	h	a	h	h	a	a	h	a	a	a	-	h	a	a	h	a	a	h	a	h	h	a	a	a	h	h	h	a	a
*scaffold174_157389	a	a	h	h	-	a	h	a	a	a	h	a	a	h	h	h	h	a	h	-	a	-	a	h	h	h	h	a	a	a	-	-	h	a	h	h	h	-	h	a	a	a	h	a	h	h	a	a	a
*scaffold174_318140C	a	a	h	h	-	a	h	a	a	a	h	a	a	h	h	h	h	a	h	a	-	a	a	h	h	h	h	a	a	a	-	a	h	a	h	h	h	a	h	a	-	a	h	a	h	h	a	a	a
*scaffold174_319085C	a	a	h	-	a	a	h	a	a	a	h	a	a	h	h	h	h	a	h	a	a	a	a	h	h	h	h	-	a	a	a	a	h	a	h	h	h	a	h	a	a	a	h	a	h	h	a	a	a
*scaffold174_606317	a	a	h	h	a	a	h	a	a	-	h	a	a	h	h	h	h	a	h	-	a	a	a	h	h	h	h	a	a	a	a	a	h	a	h	h	h	-	h	a	a	-	h	a	h	h	-	a	a
*scaffold174_692983	a	a	h	h	a	a	h	a	a	a	h	a	a	h	h	a	h	a	h	a	a	a	a	h	h	h	h	a	-	a	-	a	h	a	h	h	h	a	h	a	a	a	h	a	h	h	a	a	a
*scaffold174_69617C	a	a	h	h	a	a	h	a	a	a	h	a	a	h	h	h	h	a	-	a	a	a	a	h	h	h	h	a	a	a	a	a	h	a	h	h	h	a	-	a	a	a	h	a	h	h	a	a	a
*scaffold174_69658C	a	a	h	h	a	a	h	a	a	a	h	a	a	h	h	h	h	a	-	a	-	a	a	h	h	h	h	a	a	a	a	a	h	a	h	h	h	a	-	a	a	a	h	a	h	h	a	a	a
*scaffold174_707079C	a	a	-	-	a	a	h	a	a	a	h	a	a	-	-	a	h	a	h	a	a	a	a	h	h	-	h	a	a	a	a	a	h	a	-	h	h	a	-	a	a	a	h	a	h	h	a	a	a
*scaffold174_707118	a	a	h	h	-	a	h	a	a	-	h	a	-	h	h	a	h	-	h	-	a	-	-	h	h	h	h	a	a	a	-	a	h	a	h	h	h	-	h	a	a	a	h	a	h	h	a	a	a
*scaffold174_90282	a	a	h	h	-	a	h	a	a	a	h	a	a	h	h	h	h	a	h	-	a	-	a	h	h	h	h	a	a	a	a	a	h	a	h	h	h	a	h	a	a	a	h	a	h	h	a	a	a
*scaffold176_384047C	a	h	a	-	-	h	a	a	a	h	a	h	h	h	a	h	-	a	h	-	h	a	a	a	a	h	a	a	a	h	a	h	a	a	a	a	h	-	-	a	a	a	h	h	h	-	a	a	a
*scaffold176_430979C	a	h	a	h	h	h	a	a	a	h	a	h	h	h	-	h	h	a	h	h	h	a	a	a	a	h	a	a	a	h	a	h	a	a	a	a	h	-	-	a	a	a	h	h	h	h	a	a	a
*scaffold177_169587	h	h	-	-	-	a	h	a	h	h	a	a	a	h	h	h	h	-	h	-	a	h	a	a	a	a	-	a	h	h	h	a	h	h	h	a	h	h	h	h	h	a	a	h	a	a	h	a	h
*scaffold177_386173C	h	h	a	a	a	a	h	a	h	h	-	a	a	h	h	h	h	a	h	a	a	-	a	a	-	a	a	a	h	h	h	a	h	h	h	a	h	h	h	h	h	a	a	h	a	a	h	a	h
*scaffold178_176048C	a	a	h	a	h	h	a	a	a	h	h	a	a	a	a	a	a	a	a	-	h	h	h	a	h	a	h	h	h	h	h	a	a	h	h	a	a	h	h	a	h	h	h	h	h	h	h	a	h
*scaffold178_176206	a	a	h	a	h	h	a	a	a	h	h	a	a	a	a	a	a	a	a	h	h	h	h	a	h	a	h	h	h	h	h	a	a	h	h	a	a	h	h	a	h	h	h	h	h	h	h	a	h
*scaffold178_203543	-	a	h	-	h	h	a	a	a	h	h	a	a	a	a	a	a	a	a	h	h	h	h	a	h	a	h	h	h	h	h	a	a	h	h	a	a	h	h	a	h	h	h	h	h	h	h	a	h
*scaffold178_294086	a	a	h	a	h	h	a	a	a	h	h	a	a	a	a	a	a	a	a	h	h	h	h	a	h	a	h	h	h	h	h	a	a	h	h	a	a	h	h	a	h	h	h	h	h	h	h	a	h
*scaffold178_303374	a	a	h	-	h	h	a	a	a	h	h	a	a	a	a	a	a	a	-	h	h	h	h	a	h	a	h	h	h	h	h	-	a	h	h	a	a	h	h	a	h	h	h	h	h	h	h	a	h
*scaffold178_414446	a	a	h	-	h	h	a	a	a	h	h	a	a	a	a	a	-	a	a	h	h	h	h	a	h	a	h	h	h	h	h	a	-	h	h	a	a	h	h	a	h	h	h	h	h	h	h	a	h
*scaffold178_457397	a	a	h	-	h	h	a	a	a	h	h	a	a	a	a	a	a	a	a	h	h	h	h	a	h	a	h	h	h	-	h	a	a	h	h	a	a	h	h	a	h	h	h	h	h	h	h	a	h
*scaffold178_542900	a	a	h	-	h	h	a	-	a	h	h	a	-	-	-	a	a	-	a	h	h	h	h	a	h	a	h	h	h	h	h	a	a	h	h	a	a	h	h	a	h	h	h	h	h	h	h	a	h
*scaffold178_925111C	a	a	h	a	h	h	a	a	a	h	h	a	a	a	a	a	a	a	a	-	h	h	h	a	h	a	h	h	a	h	-	a	a	h	h	a	a	-	h	a	h	h	h	h	h	h	h	a	h
*scaffold178_995034	a	a	h	a	h	h	a	a	a	h	h	a	a	a	a	a	a	a	a	h	h	h	h	a	h	a	h	h	a	h	h	a	a	h	h	a	a	h	h	a	h	h	h	h	h	h	h	a	h
*scaffold178_995152	a	a	h	a	h	h	a	a	a	h	h	a	a	a	a	a	a	a	a	h	h	h	h	a	h	a	h	h	a	h	h	a	a	h	h	a	a	h	h	a	h	h	h	h	h	h	h	a	h
*scaffold18_1342045	a	a	a	a	a	a	h	a	a	a	a	a	a	a	h	a	a	a	a	-	h	-	h	h	a	a	h	h	a	h	-	a	a	a	h	a	a	h	a	h	a	-	a	a	h	h	h	a	a
*scaffold18_230237	a	a	-	-	-	a	h	-	a	a	-	a	a	a	h	a	-	-	a	-	h	-	h	h	a	a	h	h	a	h	-	h	a	a	h	a	a	h	-	h	a	a	a	a	h	h	h	a	a
*scaffold18_254511	a	a	-	-	-	a	h	a	a	a	-	a	-	a	h	a	-	-	a	h	h	-	h	h	a	a	h	h	a	h	-	h	a	a	h	a	a	h	a	h	a	a	a	a	h	h	h	a	a
*scaffold180_457047	h	h	-	h	-	h	h	h	a	h	h	a	-	-	a	h	h	a	a	-	a	h	h	h	a	h	h	a	h	a	h	a	a	h	a	a	a	-	h	h	a	a	h	a	a	a	a	a	h
*scaffold180_457069	h	h	-	h	-	h	h	h	a	h	h	a	-	-	a	h	h	a	a	-	a	h	h	h	a	h	h	a	h	a	h	a	a	h	a	a	a	-	h	h	a	a	h	a	a	a	a	a	h
*scaffold180_505076C	h	h	a	-	a	h	h	h	a	h	h	a	a	a	a	h	h	a	a	a	a	-	-	h	a	h	h	a	h	a	-	a	a	h	a	a	a	a	h	h	a	a	h	a	a	a	a	a	h
*scaffold180_505079C	h	h	a	-	a	h	h	h	a	h	-	a	a	a	a	h	h	a	a	a	a	-	-	h	a	h	h	a	h	a	-	a	a	h	a	a	a	a	h	h	a	a	h	a	a	a	a	a	h
*scaffold180_505081C	h	h	a	-	a	h	h	h	a	h	-	a	a	a	a	h	h	a	a	a	a	-	-	h	a	h	h	a	h	a	-	a	a	h	a	a	a	a	h	h	a	a	h	a	a	a	a	a	h
*scaffold180_505185	h	-	a	h	a	h	h	h	a	h	h	a	a	a	a	h	h	a	a	h	a	h	h	h	a	h	h	a	h	a	h	a	a	h	a	a	a	a	h	h	a	a	h	a	a	a	a	a	h
*scaffold180_505194	h	-	a	h	a	h	h	h	a	h	h	a	a	a	a	h	h	a	a	h	a	h	h	h	a	h	h	a	h	a	h	a	a	h	a	a	a	a	h	h	a	a	h	a	a	a	a	a	h
*scaffold180_582663	h	h	-	h	-	h	h	h	a	h	h	a	a	a	-	h	h	-	a	h	a	h	h	h	a	h	h	a	h	a	h	a	a	h	a	a	a	-	-	h	a	a	h	a	a	a	a	a	h
*scaffold180_660375	h	h	a	h	a	h	h	-	a	h	h	a	a	a	a	h	h	-	a	-	a	h	h	-	a	h	h	a	h	a	h	a	a	h	a	a	a	a	h	h	a	a	-	a	a	a	a	a	h
*scaffold180_698429	h	h	a	h	a	h	h	h	a	h	h	a	a	a	a	h	h	a	a	-	a	h	h	h	a	h	h	a	h	a	h	a	a	h	-	a	a	-	h	h	a	-	h	a	a	a	-	a	h
*scaffold181_457584	a	a	h	-	h	h	a	a	a	h	h	a	a	-	a	a	a	-	a	h	h	h	-	a	h	a	h	h	a	h	h	a	a	h	h	-	a	h	h	a	h	h	h	h	h	h	h	a	h
*scaffold182_213367	a	h	a	a	h	a	h	h	a	-	a	h	h	a	h	h	a	h	-	-	a	h	-	h	a	h	h	a	h	h	h	h	a	a	h	-	a	-	-	h	a	a	h	h	a	h	h	a	a
*scaffold182_234954	a	h	a	-	h	a	h	h	a	a	a	h	h	a	h	h	a	h	a	-	a	h	a	h	a	h	h	a	h	h	h	h	a	a	h	a	a	-	a	h	-	a	h	h	a	h	h	a	a
*scaffold182_234961C	a	h	a	a	h	a	h	h	a	a	a	h	h	a	h	h	a	h	a	a	a	-	a	h	a	h	h	a	h	h	-	h	a	a	h	a	a	a	a	h	a	a	h	h	a	h	h	a	a
*scaffold182_484589C	a	h	a	a	h	a	h	h	a	a	a	h	-	a	h	h	a	-	a	a	a	-	a	h	a	h	h	a	h	h	-	h	a	a	h	a	a	a	a	h	a	a	h	h	a	h	-	a	a
*scaffold182_494750	a	h	a	a	h	a	h	h	a	a	a	h	h	a	h	h	a	h	a	-	a	h	a	h	a	h	h	a	h	h	h	h	a	a	h	a	a	a	a	h	a	a	h	h	a	h	h	a	a
*scaffold182_713820C	-	h	a	a	-	a	h	h	a	a	a	h	h	a	h	h	a	h	a	a	a	-	a	h	a	h	h	a	h	h	h	h	a	a	h	a	a	a	a	h	a	a	h	h	a	h	h	a	a
*scaffold182_771143	a	h	a	a	h	a	h	h	a	a	a	h	h	a	h	h	a	h	a	h	a	h	a	h	a	h	h	a	h	h	h	h	a	a	h	a	a	a	a	h	a	a	h	h	a	h	h	a	a
*scaffold182_771156C	a	h	a	a	h	a	h	h	a	a	a	h	h	a	h	h	a	h	a	a	a	h	a	h	a	h	h	a	h	h	h	h	a	a	h	a	a	a	a	h	a	a	h	h	a	h	h	a	a
*scaffold183_525736	a	a	a	h	a	a	a	a	h	a	h	h	h	h	a	a	h	-	-	h	a	h	a	h	a	h	a	h	h	h	-	h	h	h	a	a	a	h	h	a	-	a	h	a	h	a	a	h	h
*scaffold183_525781C	a	a	a	-	a	a	a	a	h	a	h	h	h	h	a	a	h	a	a	a	a	-	a	h	a	-	a	h	h	-	a	-	h	h	a	a	a	-	h	a	a	a	h	a	h	a	a	h	h
*scaffold183_576144C	a	-	a	-	a	a	a	a	h	a	h	h	-	h	a	a	-	a	a	-	a	h	a	h	a	h	a	h	h	h	a	h	h	h	a	a	a	h	h	a	a	a	h	-	h	a	a	h	h
*scaffold184_668987	h	h	a	a	a	a	h	a	h	h	a	a	a	h	h	h	h	a	h	a	a	h	a	a	a	a	a	a	h	h	h	-	h	h	h	a	h	h	h	h	a	a	a	h	a	a	h	a	h
*scaffold185_369452	h	a	a	h	a	a	a	h	a	h	h	a	a	a	a	a	h	h	h	a	a	a	-	h	a	h	h	a	h	a	-	a	a	h	h	a	h	a	a	h	a	h	h	h	a	a	h	h	a
*scaffold185_369474	h	a	a	h	a	a	a	h	a	h	h	a	a	a	a	a	-	h	h	-	a	a	h	h	a	h	h	a	h	a	-	a	a	h	h	a	h	a	a	h	a	h	h	h	a	a	h	h	a
*scaffold185_369503C	h	a	a	-	a	a	-	h	a	h	h	a	a	a	-	a	h	h	h	a	a	a	h	h	a	h	-	a	h	-	a	a	a	h	h	a	h	a	a	h	a	-	h	h	a	a	h	-	a
*scaffold185_573410	h	a	a	h	a	a	a	h	a	h	h	a	a	a	a	a	h	h	h	a	a	-	h	h	a	h	h	a	h	a	-	h	a	h	h	a	h	a	-	h	a	h	h	h	a	a	h	h	a
*scaffold186_211308C	h	h	a	a	a	a	h	a	h	h	a	a	a	h	h	h	h	a	-	a	a	h	a	h	a	a	a	a	h	-	-	a	h	h	-	a	h	-	h	h	h	a	a	h	a	a	h	a	h
*scaffold187_275671	a	h	-	h	h	h	h	h	a	-	a	h	h	h	h	a	h	h	a	-	a	h	h	h	a	a	h	a	h	h	-	h	a	a	-	-	a	a	-	h	a	a	h	h	a	h	h	a	a
*scaffold187_275831	a	h	a	h	h	h	h	h	a	a	a	h	h	h	h	a	h	h	a	h	a	h	h	h	a	a	h	a	h	h	-	h	a	a	h	a	a	a	a	h	a	a	h	h	a	h	h	a	a
*scaffold187_289015C	a	h	a	h	h	h	h	h	a	a	a	h	h	h	h	a	h	h	a	a	a	h	h	h	a	a	h	a	h	h	a	h	a	a	h	a	a	a	a	h	a	a	h	h	a	h	h	a	a
*scaffold187_425162C	a	h	a	h	h	h	h	h	a	a	a	h	h	h	h	a	h	h	a	a	a	h	h	h	a	h	h	a	h	h	a	h	a	a	h	a	a	a	a	h	a	a	h	h	a	h	h	a	a
*scaffold187_727158	a	h	a	h	h	h	h	h	a	a	a	h	h	h	h	h	h	h	a	-	a	h	h	h	a	h	h	a	h	h	a	h	a	a	h	a	a	a	a	h	a	a	h	h	a	h	h	a	a
*scaffold187_87184	a	-	a	h	h	h	h	h	a	a	-	h	h	h	h	a	h	-	a	h	a	h	-	h	a	a	h	a	h	h	-	h	a	a	h	a	a	a	a	h	a	a	h	h	a	h	h	a	a
*scaffold187_87299C	a	h	a	h	h	h	h	h	a	a	a	h	h	h	h	a	h	h	a	a	a	h	h	h	a	a	h	a	h	h	a	h	a	a	h	a	a	a	a	h	a	a	h	h	a	h	h	a	a
*scaffold188_180108C	a	h	a	a	h	h	h	a	h	h	h	a	a	a	a	a	a	a	a	h	h	a	h	h	h	h	h	h	a	a	a	a	a	a	h	h	a	a	h	a	h	a	a	a	h	a	h	h	a
*scaffold188_180477C	a	h	a	a	h	h	h	a	h	h	h	a	a	a	a	a	a	a	a	h	h	a	h	h	h	h	h	h	a	a	a	a	a	a	h	h	a	a	h	a	h	a	a	a	h	a	h	h	a
*scaffold188_180667C	a	h	a	-	h	h	h	a	h	-	h	a	a	a	a	a	a	-	a	h	h	a	h	h	h	h	h	h	a	-	a	a	a	a	h	h	a	a	h	a	h	a	a	a	h	a	h	-	a
*scaffold188_292380C	a	h	a	a	h	h	h	a	h	h	h	a	a	a	a	a	a	a	a	h	h	a	h	h	h	h	h	h	a	a	a	a	a	a	h	h	a	a	h	a	h	a	a	a	h	a	h	h	a
*scaffold188_325208	a	h	a	-	h	h	h	a	h	h	h	a	-	a	a	a	-	-	a	h	h	-	h	h	h	h	h	h	a	a	-	a	-	a	h	h	a	a	h	a	h	a	a	a	h	a	h	h	a
*scaffold188_325306C	a	h	a	a	-	h	-	a	h	h	h	a	a	a	a	a	a	a	a	-	-	a	h	h	h	h	h	h	a	a	a	a	a	a	h	h	a	a	-	a	h	a	a	a	h	a	h	h	a
*scaffold188_599182	a	h	a	-	-	h	h	a	h	h	h	a	-	a	a	a	a	a	a	h	h	-	h	h	h	h	h	h	a	a	-	a	a	a	h	h	a	-	h	a	h	a	a	a	h	a	h	h	a
*scaffold188_602910	-	h	a	a	a	h	h	a	h	h	h	a	a	a	a	a	a	a	-	h	h	a	h	h	h	h	h	h	a	-	-	h	a	a	h	h	-	a	h	a	h	-	a	a	h	a	h	h	a
*scaffold188_716404C	a	h	a	a	a	h	h	a	h	-	h	a	a	a	a	a	a	a	a	-	h	a	h	h	h	h	h	h	a	a	a	a	a	a	h	h	a	a	-	a	h	a	a	a	h	a	h	h	a
*scaffold189_372904	a	h	h	h	h	h	h	h	a	-	a	a	-	h	h	a	h	a	a	-	h	h	h	a	a	a	h	h	a	a	-	a	a	a	h	-	a	h	-	h	a	-	h	h	a	a	h	h	a
*scaffold19_1039873	h	a	-	h	h	a	a	a	a	a	a	a	-	h	a	a	h	a	-	-	h	h	h	a	-	h	a	a	h	h	-	h	a	a	h	h	a	-	a	a	h	a	a	a	a	h	a	a	h
*scaffold19_1498583	h	a	a	h	h	a	a	h	a	a	a	a	-	h	a	a	h	a	a	-	h	h	h	a	a	h	a	a	h	h	a	h	a	a	h	h	a	a	a	a	h	a	a	a	h	h	a	a	h
*scaffold19_1498668C	h	a	a	-	-	a	a	h	a	a	a	a	a	h	a	-	-	a	a	a	h	-	h	a	a	h	a	a	h	h	a	-	a	a	h	h	a	a	a	a	h	a	a	a	h	h	a	a	h
*scaffold19_1514169	h	a	a	h	h	a	a	h	a	a	a	a	a	h	a	a	h	-	a	h	h	h	h	a	a	h	a	a	h	h	-	h	a	a	h	h	a	a	a	a	h	-	a	a	h	h	-	a	h
*scaffold19_1531542C	h	a	a	h	h	a	a	h	a	a	a	a	a	h	a	a	h	a	a	a	h	h	h	a	a	h	a	a	h	h	a	h	a	a	-	h	a	a	a	a	h	a	a	a	h	h	a	a	h
*scaffold19_1531724C	h	a	a	h	h	a	a	h	a	a	a	a	a	h	a	a	h	a	a	a	h	h	h	a	a	h	a	a	h	h	a	h	a	a	h	h	a	a	a	a	h	a	a	a	h	h	a	a	h
*scaffold19_1644615C	h	a	a	-	h	a	a	h	a	a	a	a	a	h	a	a	h	a	a	a	h	-	h	a	a	h	a	a	a	h	a	a	a	a	h	h	a	a	a	a	h	a	a	a	h	h	a	a	h
*scaffold19_2434405	a	a	-	h	h	a	a	h	a	-	a	a	-	h	-	a	h	-	a	-	h	h	h	a	a	h	a	a	a	h	-	a	a	a	h	h	a	-	a	a	h	a	a	a	h	h	a	a	h
*scaffold19_2510193C	a	a	a	-	-	a	a	h	a	a	a	a	a	h	a	a	h	a	a	a	h	-	h	a	a	h	a	a	a	h	a	a	a	a	h	h	-	a	a	h	h	a	a	a	h	h	a	a	h
*scaffold19_2565898	a	a	a	h	h	a	a	h	a	a	a	a	a	h	a	a	h	a	a	h	h	h	h	a	-	h	a	a	a	h	-	-	a	a	h	h	a	a	a	h	h	a	a	a	h	h	a	a	h
*scaffold19_2565900	a	a	a	h	h	a	a	h	a	a	a	a	a	h	a	a	h	a	a	h	h	h	h	a	a	h	a	a	a	h	-	a	a	a	h	h	a	a	a	h	h	a	a	a	h	h	a	a	h
*scaffold19_2565901C	a	-	a	h	h	a	a	h	a	a	a	a	a	h	a	a	h	a	a	a	h	-	h	-	a	h	a	a	a	h	a	a	a	-	h	h	-	a	a	h	h	a	a	a	h	h	a	a	h
*scaffold19_2566046	a	a	a	h	h	a	a	h	a	a	a	a	a	h	a	a	h	a	a	-	h	h	h	a	a	h	a	a	a	h	-	-	a	a	h	h	a	a	a	h	h	a	a	a	h	h	a	a	h
*scaffold19_2629118	a	a	-	h	h	a	a	h	a	-	a	a	a	h	-	a	h	-	a	-	h	h	h	a	a	h	a	a	a	h	-	-	a	a	h	h	a	-	a	h	h	-	a	a	h	h	a	a	h
*scaffold19_2697125C	a	a	a	-	-	a	a	h	a	a	a	a	a	h	a	a	h	a	a	a	-	-	h	a	a	h	a	a	a	-	a	a	a	a	h	h	a	a	a	h	h	a	a	a	h	h	a	a	h
*scaffold19_3269058C	a	a	a	-	h	a	a	h	a	a	a	a	a	h	a	a	h	a	a	a	h	h	h	a	a	h	a	a	a	h	a	a	a	a	h	h	a	a	a	h	h	a	a	a	h	h	a	a	h
*scaffold19_3527475C	a	a	a	-	h	h	a	h	a	a	a	a	a	h	a	a	h	a	a	a	h	h	h	a	a	h	a	a	a	h	a	a	a	a	h	h	a	a	a	h	h	a	a	a	h	h	a	a	h
*scaffold19_3563975C	a	a	a	-	-	h	a	h	a	a	a	a	a	h	a	a	-	a	a	a	h	-	h	a	a	h	a	a	a	h	a	a	a	a	h	h	a	a	a	h	h	a	a	a	h	h	a	a	h
*scaffold19_3619484	a	a	a	h	h	h	a	h	a	a	a	a	-	-	a	a	h	a	a	-	h	h	h	a	a	h	a	a	a	-	-	a	h	a	h	h	a	a	a	h	h	a	a	a	h	h	a	a	h
*scaffold19_3733648C	a	a	a	-	h	h	a	h	a	a	a	a	a	h	a	a	h	a	a	a	h	-	h	a	a	h	a	a	a	-	a	a	h	a	h	-	a	a	a	h	h	a	a	a	h	h	a	a	h
*scaffold19_3989151	a	a	-	h	h	h	a	h	a	-	-	a	a	h	-	a	h	-	a	h	h	h	h	a	a	h	-	a	a	h	-	a	h	a	h	h	a	-	a	h	h	a	a	a	h	h	a	a	h
*scaffold19_3994624	a	a	-	h	h	h	a	h	a	a	a	a	-	h	a	a	h	a	a	-	h	h	h	a	a	h	a	a	-	h	-	a	h	a	h	h	a	-	-	h	h	-	a	a	h	h	a	a	h
*scaffold19_3994630C	a	a	a	-	-	h	a	h	a	a	a	a	a	h	a	a	h	a	a	a	h	-	-	a	a	h	a	a	a	h	a	a	h	a	h	-	a	a	a	h	h	a	a	a	h	h	a	a	h
*scaffold19_3994633	a	a	-	h	h	h	a	h	a	a	a	a	a	h	a	a	h	a	a	-	h	h	h	a	a	h	a	a	a	h	a	a	h	a	h	h	a	a	a	h	h	a	a	a	h	h	a	a	h
*scaffold19_3994650	a	a	a	h	h	h	a	h	a	a	a	a	a	h	a	a	h	a	a	-	h	h	h	a	a	h	a	a	a	h	a	a	h	a	h	h	a	a	a	h	h	a	a	a	h	h	a	a	h
*scaffold19_3994669C	a	a	a	-	-	h	a	h	a	a	a	a	a	h	a	a	h	a	a	a	h	-	h	a	a	h	a	a	a	h	a	a	h	a	h	h	a	a	a	h	h	a	a	a	h	h	a	a	h
*scaffold19_4016101	a	a	-	h	h	h	a	h	a	a	a	a	a	h	a	a	h	a	a	-	h	h	h	a	a	h	a	a	a	h	-	a	h	a	h	h	a	a	a	h	a	a	a	a	h	h	a	a	h
*scaffold19_4027645C	a	a	a	-	h	h	a	-	a	a	a	a	a	-	a	a	-	a	a	a	h	h	h	a	a	h	a	a	a	h	a	a	h	a	h	h	a	a	a	h	-	a	a	a	h	h	a	a	h
*scaffold19_4038296C	a	a	a	-	h	h	a	h	a	a	a	a	a	h	a	a	h	a	a	a	h	-	h	a	a	h	a	a	a	h	a	a	h	a	-	h	a	a	a	h	a	a	a	a	h	h	a	a	h
*scaffold19_4047215C	a	a	a	h	h	h	a	h	a	a	a	a	a	h	a	a	h	a	a	a	h	-	h	a	a	h	a	a	a	-	a	a	h	a	-	-	a	a	a	h	a	a	a	a	h	h	a	a	h
*scaffold19_622253C	a	a	h	h	h	a	h	a	h	h	h	a	a	h	a	a	a	a	h	h	h	h	a	a	h	h	a	h	h	a	a	a	a	a	a	h	h	a	a	a	h	a	a	a	h	a	-	h	a
*scaffold19_918181	h	a	a	h	h	a	a	a	a	a	a	a	a	h	-	a	h	a	a	-	h	h	h	a	a	h	a	a	h	h	a	h	a	a	h	h	a	a	a	a	h	a	a	a	a	h	a	a	h
*scaffold19_976887	h	a	a	h	h	a	a	a	a	a	a	a	a	h	a	a	h	-	a	-	h	h	h	a	a	h	a	a	h	h	a	h	a	a	h	h	a	a	a	a	h	a	a	a	a	h	a	a	h
*scaffold190_140995	a	h	a	a	h	h	h	a	a	h	a	a	a	a	a	a	a	a	h	-	a	h	h	a	a	h	-	a	a	h	a	a	h	h	a	h	h	a	a	h	h	a	h	a	a	h	h	h	a
*scaffold190_159522	a	h	-	-	h	h	h	a	a	h	a	a	a	-	-	a	a	-	h	-	a	h	h	a	a	h	a	a	a	h	a	a	h	h	a	h	h	a	a	h	h	-	h	a	a	h	h	h	a
*scaffold190_159560	a	-	a	a	h	h	h	a	a	h	a	a	a	a	a	a	a	a	h	a	a	h	h	a	a	h	a	a	a	h	a	a	h	h	a	h	h	a	a	h	h	a	h	a	a	h	h	h	a
*scaffold190_159569	a	-	a	a	h	h	h	a	a	h	a	a	a	a	a	a	a	a	h	a	a	h	h	a	a	h	a	a	a	h	a	a	h	h	a	h	h	a	a	h	h	a	h	a	a	h	h	h	a
*scaffold190_256709	a	h	a	-	h	h	h	a	a	h	a	a	-	a	-	a	a	a	h	-	a	h	h	a	a	h	-	a	a	h	-	a	h	h	a	h	-	a	-	h	h	a	h	a	a	h	h	h	a
*scaffold190_307909C	a	h	a	a	h	h	h	-	a	h	a	a	a	a	a	a	a	a	h	a	a	-	h	a	a	h	a	a	a	h	a	a	h	h	a	h	h	a	a	h	h	-	h	a	a	h	h	h	a
*scaffold190_383980C	a	h	a	a	h	h	h	a	a	h	a	a	a	a	a	a	a	a	h	a	a	h	h	a	a	h	a	a	a	h	a	a	h	h	a	h	h	a	a	h	h	a	h	a	-	h	h	h	a
*scaffold192_268574C	a	a	-	-	-	a	a	h	h	a	h	a	a	h	-	a	a	a	a	a	h	a	h	h	a	a	h	h	h	a	h	a	h	h	a	a	a	h	h	a	a	a	h	a	a	h	a	h	h
*scaffold192_268606C	a	a	-	-	-	a	a	h	h	a	h	a	a	h	-	a	a	a	a	a	h	a	h	h	a	a	h	h	h	a	-	a	h	h	a	a	a	h	h	a	a	a	h	a	a	h	a	h	h
*scaffold192_272058C	a	a	-	-	-	a	a	h	h	a	h	a	a	-	h	a	a	a	a	a	h	a	h	h	a	a	h	h	h	a	h	a	h	h	a	a	a	-	h	a	a	a	h	a	a	h	a	h	h
*scaffold192_292021	a	a	h	h	h	a	a	h	h	a	h	a	a	h	h	a	a	a	a	a	h	a	h	h	a	a	h	h	h	a	h	a	h	h	a	a	a	h	h	a	a	a	h	a	a	h	a	h	h
*scaffold192_302058	a	a	h	h	h	-	a	h	h	a	h	a	-	h	h	a	-	a	a	-	h	-	h	h	a	a	h	h	h	a	h	a	h	h	a	-	a	h	h	a	a	a	h	a	a	h	a	h	h
*scaffold192_302091	a	a	h	h	h	-	a	h	h	a	h	-	-	h	h	a	-	a	a	-	h	-	h	h	a	a	h	h	h	a	h	a	h	h	a	-	a	h	h	a	a	a	h	a	a	h	a	h	h
*scaffold192_540954C	a	a	h	-	h	h	a	h	h	a	h	a	a	-	h	a	a	-	a	-	h	a	h	h	a	a	h	h	h	a	-	a	h	h	a	a	a	h	h	a	a	h	h	a	a	h	a	h	h
*scaffold192_540991C	a	a	h	-	h	h	a	h	h	a	h	a	a	-	h	a	a	a	a	-	h	a	h	h	a	a	h	h	h	a	-	a	h	h	a	a	a	h	h	a	a	h	h	a	a	h	a	h	h
*scaffold192_651818	a	a	h	h	h	h	a	h	h	a	h	a	-	h	h	a	-	-	-	h	h	-	h	h	a	a	h	h	h	a	h	a	h	h	a	a	a	h	h	a	a	h	h	a	a	h	a	h	h
*scaffold192_677197	a	a	h	h	h	-	a	-	h	a	h	a	a	h	h	a	a	a	a	h	h	a	h	h	a	a	h	h	h	a	h	a	h	h	a	a	a	h	h	a	a	h	h	a	a	h	a	h	-
*scaffold193_244003	a	h	h	h	h	h	h	a	a	a	a	a	a	h	h	a	h	a	a	-	h	h	h	a	a	a	h	h	a	a	a	a	a	a	h	a	a	h	a	h	a	a	h	h	a	a	h	h	a
*scaffold193_244201C	a	h	h	-	h	h	h	a	a	a	a	a	a	h	h	a	-	a	a	a	h	h	h	a	a	a	h	h	a	a	a	a	a	a	h	a	a	h	a	h	a	a	h	h	a	a	h	h	a
*scaffold193_569111	a	h	h	-	h	h	h	a	a	-	a	a	a	h	h	a	h	a	a	-	h	h	h	a	a	a	h	h	a	a	-	a	a	a	h	a	a	h	-	h	a	a	h	h	a	a	h	h	a
*scaffold193_76739C	a	h	h	-	h	h	h	a	a	a	a	a	a	h	h	a	h	a	a	a	h	-	h	a	a	a	-	h	a	a	a	a	a	a	-	a	a	h	a	h	a	a	h	h	a	a	h	h	a
*scaffold193_76779	a	h	h	h	h	h	h	a	a	a	a	a	a	h	h	a	h	a	a	-	h	h	h	a	a	a	h	h	a	a	a	a	a	a	h	a	a	h	a	h	a	a	h	h	a	a	h	h	a
*scaffold193_76821	a	h	h	h	h	h	h	a	a	a	a	a	a	h	h	a	h	-	a	h	h	h	h	a	a	a	h	h	a	a	-	a	a	a	h	a	a	h	-	h	a	a	h	h	a	a	h	h	a
*scaffold195_1010709	a	h	a	a	h	h	h	a	a	h	a	a	a	h	a	a	a	a	h	-	h	h	h	a	-	h	a	a	a	h	a	a	h	a	a	-	h	-	a	a	h	h	h	a	a	h	h	a	a
*scaffold195_325290	a	h	-	-	h	h	h	a	a	h	a	a	a	h	-	a	-	-	-	-	h	h	h	a	a	a	a	a	a	h	a	a	h	a	a	a	h	a	a	a	h	h	h	a	a	h	h	a	h
*scaffold195_421503	a	h	-	-	h	h	h	a	a	h	-	a	-	h	-	a	-	-	h	-	h	h	h	a	a	a	a	a	a	h	-	a	h	a	a	a	h	-	a	a	h	h	h	a	a	h	h	a	h
*scaffold195_673862	a	h	a	-	h	h	h	-	a	h	a	a	-	h	-	a	a	a	h	-	h	h	h	a	a	a	a	a	a	h	-	a	h	a	a	a	h	-	a	a	h	h	h	a	a	h	h	a	h
*scaffold196_160452	h	a	a	a	h	h	a	a	a	h	h	a	a	h	a	a	h	a	h	h	h	a	h	h	a	a	a	a	a	a	h	-	a	a	-	h	h	a	h	a	a	h	a	a	a	a	a	h	a
*scaffold196_160709	h	a	a	a	h	h	a	a	a	h	h	a	a	h	a	a	h	a	h	h	h	a	h	h	a	a	a	a	a	a	h	a	a	a	-	h	h	a	h	a	a	h	a	a	a	a	a	h	a
*scaffold196_160843C	h	a	a	a	h	h	a	a	a	h	h	a	a	h	a	a	h	a	h	-	h	a	h	h	a	a	a	a	a	a	h	a	a	a	a	h	h	a	-	a	a	h	a	a	a	a	a	h	a
*scaffold196_336944C	h	a	a	a	-	h	a	a	a	h	h	a	a	h	a	a	-	a	h	-	h	a	h	h	a	a	a	a	a	a	h	a	a	a	a	-	h	a	h	a	a	-	a	a	a	a	a	h	a
*scaffold196_337280	h	a	a	-	h	h	a	a	a	h	h	a	a	h	a	a	h	a	h	h	h	-	h	h	a	a	a	a	a	a	h	a	a	a	a	h	h	a	h	a	a	h	a	a	a	a	a	h	a
*scaffold196_337330	h	a	a	-	h	h	a	a	a	h	h	a	a	h	a	a	h	a	h	h	h	-	h	h	a	a	a	a	a	a	h	a	a	a	a	h	h	a	h	a	a	h	a	a	a	a	a	h	a
*scaffold196_464719	h	a	-	a	h	h	a	a	a	h	h	a	a	h	-	a	h	a	h	h	h	-	h	h	a	a	a	a	a	a	h	-	a	a	-	h	h	a	h	a	a	h	a	a	a	a	a	h	a
*scaffold196_538837	h	a	-	-	h	-	a	a	a	-	h	a	-	h	-	a	h	-	h	-	h	-	h	h	a	a	a	a	a	-	h	a	a	a	a	h	h	a	h	a	a	h	a	a	a	a	a	h	a
*scaffold197_114588	a	-	h	a	a	a	h	a	h	a	a	a	a	a	a	h	a	h	a	h	-	h	a	h	h	h	h	h	h	h	h	a	h	h	h	a	a	a	a	a	a	a	h	h	h	a	a	a	h
*scaffold197_393895C	a	h	-	a	a	a	h	a	h	a	a	a	a	a	a	h	a	h	a	h	h	-	a	h	h	h	h	h	h	h	h	a	h	h	h	h	a	a	a	a	a	a	h	h	h	a	a	a	h
*scaffold197_555338C	a	h	-	a	a	a	h	a	h	a	a	a	a	a	a	h	a	h	a	a	h	-	a	h	h	h	h	h	h	h	-	a	h	h	h	h	a	a	a	a	a	a	h	h	h	a	a	a	h
*scaffold197_555344C	a	h	-	a	a	a	h	a	h	a	a	a	a	a	a	h	a	h	a	a	h	-	a	h	h	h	h	h	h	h	-	a	h	h	h	h	a	a	a	a	a	a	h	h	h	a	a	a	h
*scaffold198_209225	h	a	-	-	h	h	a	a	a	h	h	a	a	a	h	a	h	h	h	h	h	h	a	h	h	a	h	a	h	a	h	a	a	a	h	a	h	h	a	a	a	h	h	a	h	a	a	a	h
*scaffold198_254032	h	a	a	-	h	h	a	a	a	h	h	a	a	a	h	a	h	h	h	h	h	h	a	h	h	a	h	a	h	a	h	a	a	a	h	a	h	h	a	a	a	h	h	a	h	a	a	a	h
*scaffold198_254033C	h	a	a	a	h	h	a	a	a	h	h	a	a	a	h	a	h	h	h	-	h	-	a	h	h	a	h	a	h	a	-	a	a	a	-	a	h	h	a	a	a	h	h	a	h	a	a	a	h
*scaffold198_318532	h	a	-	-	h	h	a	a	a	h	h	a	-	a	h	a	h	h	h	h	h	h	a	h	h	a	h	a	h	a	h	a	a	a	h	-	h	h	-	a	a	h	h	h	h	a	a	a	h
*scaffold198_318545	h	a	a	-	h	h	a	a	a	h	h	a	-	a	h	a	h	h	h	h	h	h	a	h	h	a	h	a	h	a	h	a	a	a	h	-	h	h	-	a	a	h	h	h	h	a	a	a	h
*scaffold198_343178C	h	a	a	a	h	h	a	a	a	a	h	a	a	a	h	a	h	h	h	a	h	h	a	h	h	a	h	a	h	a	-	a	a	a	h	a	h	-	a	a	a	-	h	h	h	a	a	a	h
*scaffold198_504047	h	a	a	a	h	h	a	a	a	h	h	a	-	a	h	a	h	h	h	h	h	h	-	h	h	a	h	a	h	a	h	a	a	a	h	-	h	h	a	a	a	h	h	h	h	a	-	-	h
*scaffold198_82520	h	a	a	a	h	h	a	a	a	h	h	a	a	a	a	a	h	h	h	h	h	h	a	h	h	a	h	a	h	a	-	a	a	a	h	a	h	h	-	a	a	h	h	a	h	a	a	a	h
*scaffold199_714474C	a	h	a	-	a	a	h	a	h	h	h	a	a	a	a	h	a	h	h	-	a	a	h	h	a	h	a	h	a	h	h	a	h	a	a	h	h	a	a	h	h	h	h	a	h	h	a	a	h
*scaffold2_145460C	h	a	a	-	a	h	a	h	a	h	-	a	a	a	a	a	-	-	h	a	a	a	h	h	a	h	-	a	h	a	a	a	a	a	-	a	h	a	a	h	a	h	h	h	a	a	h	h	a
*scaffold2_1678423C	a	a	a	-	a	a	h	a	a	a	a	a	a	h	a	h	h	h	h	h	a	a	h	a	a	h	h	h	h	a	-	a	h	a	h	h	h	a	h	h	h	h	h	a	h	h	a	h	a
*scaffold2_1808579	a	a	a	h	a	a	h	a	a	a	a	a	a	h	a	h	h	h	h	h	a	a	h	a	a	h	h	h	h	a	h	a	h	a	h	h	h	-	h	h	h	h	h	a	h	h	a	h	a
*scaffold2_1808581C	a	a	a	h	a	a	h	a	a	a	a	a	a	h	a	h	h	h	h	-	a	a	h	a	a	h	h	h	h	a	h	a	h	a	h	h	h	a	-	h	h	h	h	a	h	h	a	h	a
*scaffold2_1838392C	a	a	a	-	a	a	-	a	a	a	-	a	a	h	a	h	-	-	h	a	a	a	h	a	a	h	-	h	h	a	h	a	h	a	h	h	h	a	h	h	h	h	h	a	h	h	a	h	a
*scaffold2_2508803	a	a	a	-	a	a	h	a	a	a	h	a	a	h	a	h	h	h	h	h	a	a	h	a	a	h	h	h	-	a	h	a	-	a	h	h	h	a	h	-	h	h	h	a	-	h	a	h	a
*scaffold2_2938074C	a	a	a	-	a	a	h	a	a	a	h	a	-	h	a	h	-	-	h	-	a	a	h	a	a	h	h	h	a	a	-	a	h	a	-	h	h	a	h	h	a	h	h	a	h	h	a	h	a
*scaffold2_3325745	a	a	a	h	a	a	-	a	a	-	h	a	a	h	a	h	h	h	h	h	a	a	h	a	a	h	h	h	a	a	h	a	h	a	h	h	h	a	h	h	a	-	h	a	-	h	a	h	a
*scaffold2_4377990	a	a	-	h	-	a	h	-	a	a	h	a	-	h	a	h	h	h	-	h	a	-	a	a	a	h	h	h	a	-	h	a	h	a	h	h	h	-	h	h	a	h	h	a	h	h	a	h	a
*scaffold2_4382533C	a	a	a	-	a	a	h	a	a	a	h	a	a	-	a	h	-	h	h	-	a	a	a	a	a	h	h	h	a	a	h	a	h	a	h	h	h	a	h	h	a	h	h	a	h	h	a	h	a
*scaffold2_4382635	a	a	a	h	a	a	h	a	a	a	h	a	a	h	-	h	h	h	h	h	a	-	a	a	a	h	h	h	a	a	h	a	h	a	h	h	h	-	h	h	a	h	h	a	h	h	a	h	a
*scaffold2_4382656C	a	a	a	-	a	a	h	a	a	a	h	a	a	h	a	h	h	h	h	-	a	a	a	a	a	h	h	h	a	a	-	a	h	a	h	h	h	a	h	h	a	h	h	a	h	h	a	h	a
*scaffold2_4440976	a	a	a	h	a	a	-	a	a	a	h	a	a	h	a	h	h	h	h	h	a	-	a	a	a	h	h	h	a	a	h	a	h	a	h	h	h	a	h	h	a	h	h	a	h	h	a	h	a
*scaffold2_4943395C	a	a	a	h	a	a	h	a	a	a	h	a	a	h	a	h	h	h	h	h	a	a	a	a	a	h	h	h	a	a	h	a	h	a	h	h	h	a	h	h	a	h	h	a	h	h	a	h	a
*scaffold2_4943399	a	a	a	h	a	a	h	a	a	a	h	a	a	h	a	h	h	h	h	h	a	a	a	a	a	h	h	h	a	a	h	a	h	a	-	h	h	a	-	h	a	h	h	a	h	h	a	h	a
*scaffold2_5492230C	a	a	a	-	a	a	h	a	a	a	h	a	a	-	a	h	-	-	h	-	a	a	a	a	a	h	h	h	a	a	h	a	h	a	h	h	h	a	h	h	a	-	h	a	h	h	a	h	a
*scaffold2_5524132C	a	a	a	-	a	a	h	a	a	a	h	a	a	h	a	h	h	h	h	-	a	a	a	a	a	h	h	h	a	a	-	a	h	a	h	-	h	a	h	h	a	h	h	a	h	h	a	h	a
*scaffold2_5524138C	a	a	a	-	a	a	h	a	a	a	h	a	a	h	a	h	h	h	h	-	a	a	a	a	a	h	h	h	a	a	-	a	h	a	h	-	h	a	h	h	a	h	h	a	h	h	a	h	a
*scaffold2_5524150C	a	a	a	-	a	a	h	a	a	a	h	a	a	h	a	h	h	h	h	-	a	a	a	a	a	h	h	h	a	a	-	a	h	a	h	-	h	a	h	h	a	h	h	a	h	h	a	h	a
*scaffold2_5524288C	a	a	a	-	a	a	h	a	a	a	h	a	a	h	a	h	h	h	h	-	a	a	a	a	a	h	h	h	a	a	-	a	h	a	h	-	h	a	h	h	a	h	h	a	h	h	a	h	a
*scaffold2_5637124	a	a	a	h	a	a	h	a	a	-	h	a	a	h	a	h	h	h	h	h	a	a	a	a	a	h	h	h	a	a	h	-	h	-	h	h	h	a	h	h	a	h	h	a	h	h	a	h	a
*scaffold2_5641600C	a	a	a	-	a	a	h	a	a	a	h	a	a	h	a	h	-	h	h	-	a	a	a	a	a	h	h	h	a	a	-	a	h	a	h	h	h	a	-	h	a	h	h	a	h	h	a	h	a
*scaffold2_747367C	a	a	a	h	a	h	h	a	a	a	a	a	a	-	a	h	h	h	h	-	a	a	h	a	a	h	h	h	h	h	-	a	a	a	h	h	h	a	-	h	h	h	a	a	h	a	a	h	a
*scaffold20_1153751C	a	a	h	h	h	-	a	h	h	a	h	a	a	h	h	a	a	a	a	a	h	a	h	h	a	a	h	h	h	a	h	a	h	h	a	a	a	h	h	a	a	a	h	a	a	h	a	h	h
*scaffold20_1153890C	a	a	h	h	h	-	a	h	h	a	-	a	a	h	h	a	a	a	a	a	h	a	h	h	a	a	h	h	h	a	-	a	h	h	a	a	a	h	h	a	a	a	-	a	a	h	a	h	h
*scaffold20_1154134C	a	a	-	h	h	-	a	h	h	a	h	a	a	h	h	a	a	a	a	a	h	a	h	h	a	a	h	h	h	a	-	a	h	h	a	a	a	h	h	a	a	a	-	a	a	h	a	h	h
*scaffold20_1362778C	a	a	-	-	-	a	a	h	h	a	-	a	a	-	-	a	a	a	a	a	h	a	h	h	a	a	h	h	h	a	h	a	h	h	a	a	a	h	h	a	a	a	h	a	a	h	a	h	h
*scaffold20_1423011C	a	a	h	h	h	-	a	h	h	a	h	a	a	h	h	a	a	a	a	a	h	a	h	h	a	a	h	h	h	a	h	a	h	h	a	a	a	-	h	a	a	a	h	a	a	h	a	h	h
*scaffold20_1622230C	a	a	h	h	h	a	a	h	h	a	h	a	a	h	h	a	a	a	a	a	h	a	h	h	a	a	h	h	h	a	-	a	h	h	a	a	a	h	-	a	a	a	h	a	a	h	a	h	h
*scaffold20_1763952C	a	a	h	-	-	a	a	h	h	a	h	a	a	h	-	a	a	a	a	a	h	a	h	h	a	a	h	h	h	a	h	a	h	h	a	a	a	h	h	a	a	a	h	a	a	h	a	h	h
*scaffold20_1962049	a	a	h	h	h	a	a	h	h	a	h	a	-	h	h	a	-	-	a	-	h	-	h	h	a	a	h	h	h	a	h	a	h	h	a	a	a	h	h	a	a	a	h	a	a	h	a	h	h
*scaffold20_1962166	a	a	h	h	h	-	a	h	h	a	h	a	-	h	h	a	-	-	a	-	h	-	h	h	a	a	h	h	h	a	h	a	h	h	a	a	a	h	h	a	a	a	h	a	a	h	a	h	h
*scaffold20_1962168	a	a	h	h	h	a	a	h	h	a	h	a	-	h	h	a	-	-	a	-	h	-	h	h	a	a	h	h	h	a	h	a	h	h	a	a	a	h	h	a	a	a	h	a	a	h	a	h	h
*scaffold20_1981828C	a	a	h	-	h	-	a	h	h	a	h	a	a	h	h	a	a	a	a	a	h	a	h	h	a	a	h	h	h	a	h	a	h	h	a	a	a	h	h	a	a	a	h	a	a	h	a	h	h
*scaffold20_1982455C	a	a	h	-	h	-	a	h	h	a	h	a	a	h	h	-	a	a	a	a	h	a	h	h	a	a	h	h	h	a	-	a	h	h	a	a	a	h	h	a	a	a	h	a	a	h	a	h	h
*scaffold20_2143494	a	a	h	h	h	a	a	h	h	a	h	a	a	h	h	a	a	a	a	-	h	-	h	h	a	a	h	h	h	a	h	a	h	h	a	a	a	h	h	a	a	a	h	a	a	h	a	h	h
*scaffold20_2274960C	a	a	-	-	h	a	a	h	h	a	h	a	a	-	h	a	a	a	a	a	h	a	h	h	a	a	h	h	h	a	-	a	h	h	a	a	a	-	-	a	a	a	h	a	a	h	a	h	h
*scaffold20_431502	a	a	h	h	h	-	a	h	h	a	h	a	a	h	h	a	-	a	a	h	h	-	h	-	a	a	h	h	-	a	h	a	h	h	a	a	a	h	h	a	a	a	-	a	a	h	a	h	h
*scaffold20_619580	a	a	h	h	h	a	a	h	h	a	h	a	a	h	h	a	a	a	a	-	h	-	h	h	a	a	h	h	h	a	h	a	h	h	a	a	a	h	h	a	a	a	h	a	a	h	a	h	h
*scaffold20_765546	a	a	h	h	h	-	a	h	h	a	h	a	-	h	h	a	-	a	a	h	h	-	h	h	a	a	h	-	h	a	h	a	h	h	a	a	a	h	h	a	a	a	h	a	a	h	a	h	h
*scaffold20_792957C	a	a	-	h	-	a	a	h	h	a	h	a	a	h	-	a	a	a	a	a	h	a	h	h	a	a	h	h	h	a	-	a	h	h	a	a	a	-	h	a	a	a	h	a	a	h	a	h	h
*scaffold20_843532C	a	a	-	-	-	a	a	h	h	a	h	a	a	h	h	a	a	a	a	a	h	a	h	h	a	a	h	h	h	a	-	a	h	h	a	a	a	-	h	a	a	a	h	a	a	h	a	h	h
*scaffold20_882567C	a	a	h	h	h	-	a	h	h	a	h	a	a	h	h	a	a	a	a	a	h	a	h	h	a	a	h	h	h	a	h	a	h	h	a	a	a	h	h	a	a	a	h	a	a	h	a	h	h
*scaffold201_139573	a	h	-	-	h	a	h	h	a	h	a	h	h	a	h	h	-	h	a	-	a	h	a	h	a	h	h	a	a	h	h	h	a	a	h	h	a	h	a	h	a	a	h	h	a	h	h	a	a
*scaffold201_139576	a	h	-	-	h	a	h	h	a	h	a	h	h	a	h	h	-	h	a	-	-	h	a	h	a	h	h	a	a	h	h	h	a	a	h	h	a	h	a	h	a	a	h	h	a	h	h	a	a
*scaffold201_139772C	a	h	a	a	h	a	h	h	a	h	a	h	h	a	h	h	a	h	a	a	a	h	a	h	a	h	h	a	a	h	-	h	a	a	h	h	a	h	a	h	a	a	h	h	a	h	h	a	a
*scaffold201_140638C	a	h	a	a	h	a	h	h	a	h	a	h	h	a	h	h	a	-	a	a	a	-	a	h	a	h	h	a	a	h	h	h	a	a	h	h	a	h	a	h	a	a	h	h	a	h	h	a	a
*scaffold201_194855	-	h	a	-	h	a	h	h	a	h	a	h	h	a	h	h	a	h	a	-	a	h	a	h	a	h	h	a	a	h	h	h	-	a	h	h	a	h	-	h	-	-	h	h	a	h	h	a	a
*scaffold201_361728	a	h	a	-	h	a	h	h	a	h	a	-	h	a	h	h	a	h	a	-	a	h	a	h	a	h	h	a	a	h	h	h	a	a	h	h	a	h	a	h	a	a	h	h	a	h	-	a	a
*scaffold201_376878	a	h	a	-	h	a	h	h	a	h	a	h	h	a	h	h	-	-	a	-	a	h	a	h	a	h	h	a	a	h	h	h	a	a	h	h	a	h	a	h	a	a	h	-	a	h	h	a	a
*scaffold203_336915	a	h	h	-	h	-	h	a	a	h	a	a	a	h	a	a	a	a	a	-	a	-	h	a	a	a	a	a	a	h	a	a	h	a	h	a	a	h	a	a	h	h	h	h	a	h	h	a	h
*scaffold203_336935	a	h	h	-	h	h	h	a	a	h	a	a	a	h	a	a	a	a	a	h	a	h	h	a	a	a	a	a	a	h	a	a	h	a	h	a	a	h	a	a	h	h	h	h	a	h	h	a	h
*scaffold203_336956C	a	h	-	a	h	h	h	a	a	h	a	a	a	h	a	a	a	a	a	-	a	h	h	a	a	a	a	-	a	h	a	a	h	a	h	a	a	h	a	a	h	h	h	h	a	h	h	a	h
*scaffold203_904340C	a	h	a	a	h	h	h	a	a	-	a	a	a	h	a	a	a	a	a	h	a	-	h	a	a	a	a	a	a	h	a	a	h	a	h	a	a	-	a	a	h	h	h	h	a	h	h	a	h
*scaffold204_187388	h	h	a	h	a	h	h	a	a	h	h	a	a	a	a	h	h	a	a	-	a	h	h	h	a	a	h	a	h	a	h	a	a	h	a	a	a	a	h	h	a	a	h	a	a	a	a	a	h
*scaffold204_31691	h	h	-	h	-	h	-	a	a	h	h	a	-	a	-	h	h	a	a	-	a	h	h	h	a	h	h	a	h	a	h	-	a	h	a	a	a	a	h	h	a	a	h	a	a	a	a	a	-
*scaffold204_333186	h	h	-	h	-	h	h	a	a	h	h	a	a	a	a	h	h	a	a	h	a	h	h	h	a	a	h	a	h	a	h	a	a	h	a	a	a	a	h	h	a	a	h	a	a	a	a	a	h
*scaffold204_426039	h	h	-	h	a	h	h	-	a	h	h	a	-	-	-	h	h	-	a	-	-	h	h	h	a	a	h	a	h	a	h	a	a	h	a	a	a	a	a	h	a	a	h	a	a	a	a	a	h
*scaffold204_437374	h	h	a	h	-	h	h	a	a	h	h	a	a	a	-	h	h	-	a	-	a	h	h	h	a	a	h	a	h	a	h	a	a	h	a	a	a	-	-	h	a	a	h	a	a	a	a	a	h
*scaffold204_485521	h	h	a	h	-	h	h	-	a	h	h	a	a	a	-	h	h	-	a	h	a	h	h	h	a	a	h	a	h	a	h	a	a	h	a	a	a	a	a	h	a	a	h	a	a	a	a	a	h
*scaffold204_642348	h	h	a	h	a	h	h	a	a	h	h	a	a	a	a	h	h	a	a	a	a	h	h	h	a	a	h	a	h	a	h	-	a	h	-	a	a	-	-	h	a	a	h	a	a	-	-	a	h
*scaffold204_692677	h	h	a	h	a	h	h	a	a	h	h	a	a	a	a	h	h	a	a	-	a	h	h	h	-	a	h	a	h	a	h	a	a	h	a	a	a	a	a	h	a	a	h	a	a	a	a	a	h
*scaffold206_136428C	a	h	a	-	a	h	h	h	a	h	h	a	a	a	a	h	h	a	a	a	a	-	h	h	a	h	h	a	h	a	-	a	a	h	a	a	a	a	-	h	a	a	h	a	a	a	a	a	h
*scaffold206_254443	a	h	a	h	a	h	h	h	a	h	h	a	a	a	-	h	h	a	a	-	a	h	h	h	a	h	h	a	h	a	h	-	a	h	a	a	a	-	h	h	a	a	h	a	a	a	a	a	h
*scaffold206_254600	a	h	a	h	a	h	h	h	a	h	h	a	a	a	-	h	h	a	a	-	a	h	h	h	a	h	h	a	h	a	h	a	a	h	a	a	a	-	h	h	a	a	h	a	a	a	a	a	h
*scaffold206_477420C	a	h	a	-	a	h	h	h	a	h	h	a	a	a	a	h	h	a	a	a	a	-	h	h	a	h	h	a	h	a	-	a	a	h	a	a	a	a	-	h	a	a	h	a	a	a	a	a	h
*scaffold208_221491	h	a	h	a	a	a	a	a	h	h	a	a	a	-	h	a	a	a	h	h	a	-	-	a	a	a	h	h	h	h	h	h	h	h	h	h	h	-	h	a	a	h	h	h	h	h	a	h	h
*scaffold208_37514	h	a	h	a	a	a	a	a	-	h	a	a	a	a	h	a	a	a	h	h	a	a	a	a	a	a	h	h	h	h	h	h	a	h	h	h	h	a	h	a	a	h	h	h	h	h	a	h	h
*scaffold208_413384C	h	a	h	a	a	a	a	a	h	h	a	a	a	a	-	a	a	a	h	h	a	a	a	a	a	a	h	h	h	h	-	h	a	h	h	h	h	a	h	a	a	h	h	h	h	h	a	h	h
*scaffold208_569437	h	a	h	-	a	a	a	a	h	h	a	a	a	a	h	a	a	a	h	h	a	-	a	a	a	a	h	h	h	h	h	h	a	h	h	h	h	a	h	a	a	h	h	h	h	h	a	h	h
*scaffold209_620912C	h	a	a	-	a	h	a	h	a	h	h	a	a	a	a	a	h	h	-	a	a	a	h	h	a	h	h	a	h	a	a	a	a	a	h	a	h	a	a	h	a	h	h	h	a	a	h	h	a
*scaffold209_620921	h	a	a	h	-	h	a	h	a	h	h	a	a	a	a	a	h	h	h	-	a	-	h	h	a	h	h	a	h	a	a	-	a	a	h	a	h	a	a	h	a	h	h	h	a	a	h	h	a
*scaffold21_141135C	a	h	a	a	a	a	h	h	a	a	h	a	a	a	h	h	h	a	h	-	h	a	h	h	h	a	h	h	h	a	h	a	a	a	h	a	h	a	h	h	a	a	a	h	h	h	h	a	a
*scaffold21_141159	a	h	a	-	a	a	h	h	a	a	h	a	a	a	h	h	h	a	h	h	h	a	h	h	h	a	h	h	h	a	h	a	a	a	h	-	h	a	h	h	a	a	a	h	h	h	h	a	a
*scaffold21_2028839	a	h	-	-	a	a	h	h	a	-	h	a	-	a	h	h	h	-	h	h	h	a	a	h	h	a	h	h	h	h	h	a	a	a	h	a	h	-	h	h	a	a	a	h	h	h	a	a	a
*scaffold21_2343400	a	h	a	a	a	a	h	h	a	a	h	a	a	a	h	h	h	a	h	-	h	a	a	h	h	a	h	h	h	h	h	a	a	a	h	a	h	a	h	h	a	a	a	h	h	h	a	a	a
*scaffold21_2343424C	a	h	a	a	a	a	h	h	a	a	h	a	a	a	h	h	h	a	h	a	h	a	a	h	h	a	h	h	h	h	h	a	a	a	h	a	h	a	h	h	a	a	a	h	h	h	a	a	a
*scaffold21_2343467	a	h	a	a	a	a	h	h	a	a	h	a	a	a	h	h	h	a	h	-	h	a	a	h	h	a	h	h	h	h	h	a	a	a	h	a	h	a	h	h	a	a	a	h	h	h	a	a	a
*scaffold21_2348428	a	h	-	-	a	a	h	h	a	a	h	a	a	a	h	h	h	-	h	h	h	-	a	h	h	a	h	h	h	h	h	a	a	a	h	a	h	a	h	h	a	a	a	h	h	h	a	a	a
*scaffold21_268815	a	h	-	-	-	a	h	h	a	a	h	a	-	a	h	h	h	a	h	h	h	-	h	h	h	a	h	h	h	a	h	a	a	a	h	a	h	-	h	h	a	a	a	h	h	h	h	a	a
*scaffold21_395325	a	h	a	-	a	a	h	h	a	a	h	a	a	a	h	h	h	a	h	h	h	a	h	h	h	a	h	h	h	a	h	a	a	a	h	a	h	a	h	h	a	a	a	h	h	h	h	a	a
*scaffold21_420088C	a	h	a	a	a	a	h	h	a	a	h	a	a	a	-	h	h	a	h	-	h	a	h	h	h	a	h	h	h	a	h	a	-	a	h	a	h	a	h	h	a	a	a	h	h	h	h	a	a
*scaffold21_420149	a	h	a	-	a	a	h	h	a	a	h	a	a	a	h	h	h	a	h	h	h	-	h	h	h	a	h	h	h	a	h	a	a	a	h	a	h	a	h	h	a	a	a	h	h	-	h	a	a
*scaffold21_539270	a	h	a	-	a	a	h	h	a	a	h	a	a	a	h	h	h	a	h	h	h	a	h	h	h	a	h	-	h	h	h	a	a	a	h	a	h	a	h	h	a	a	a	h	h	h	a	a	a
*scaffold21_597513C	a	h	a	a	a	a	h	h	a	a	h	a	a	a	h	h	h	a	h	-	h	a	h	h	h	a	h	h	h	h	-	a	a	a	h	a	h	a	h	h	a	a	a	h	h	h	a	a	a
*scaffold21_597530	a	h	a	a	a	a	h	h	a	a	h	a	a	a	h	-	h	a	h	h	h	-	h	h	h	a	h	h	h	h	h	a	a	a	h	a	h	-	h	h	a	a	a	h	h	h	a	a	a
*scaffold21_597545	a	h	a	a	a	a	h	h	a	a	h	a	a	a	h	-	h	a	h	h	h	-	h	h	h	a	h	h	h	h	h	a	a	a	h	a	h	-	h	h	a	a	a	h	h	h	a	a	a
*scaffold21_605164	a	h	a	-	a	a	h	h	a	-	h	a	a	a	h	h	h	a	h	h	h	a	h	h	h	a	h	h	h	h	h	a	a	a	h	a	h	a	h	h	a	a	a	h	h	h	a	a	a
*scaffold21_641217C	a	h	a	a	a	a	h	h	a	a	h	a	a	a	h	h	-	a	h	-	h	a	-	h	h	a	h	h	h	h	-	a	a	a	h	a	h	a	-	h	a	a	a	h	h	h	a	a	a
*scaffold210_269310	h	h	h	h	h	a	a	h	a	a	a	a	a	a	a	a	h	h	h	a	h	a	a	h	h	a	a	h	a	h	h	h	h	h	-	a	h	h	h	h	h	a	h	a	a	h	-	a	h
*scaffold210_329272	h	h	h	h	h	a	a	h	a	a	a	a	-	a	-	a	h	h	h	-	h	a	a	h	h	a	a	h	a	h	h	h	h	h	a	-	h	h	h	h	h	a	h	a	a	h	-	a	h
*scaffold210_408034C	h	h	h	-	h	a	a	h	a	a	a	a	a	a	a	a	h	h	h	a	h	a	a	h	h	a	a	h	a	h	h	h	h	a	a	a	h	h	h	h	h	a	h	a	a	h	a	a	h
*scaffold210_446580C	h	h	h	-	h	a	a	h	a	a	a	a	a	a	a	a	h	-	h	a	h	a	a	h	h	a	a	h	a	h	-	h	h	a	a	a	h	-	-	h	h	a	h	a	a	h	a	a	h
*scaffold210_582054C	h	h	h	-	-	a	a	h	a	a	a	a	a	a	a	a	h	-	h	a	h	a	a	h	h	a	a	h	a	h	h	h	h	a	a	a	h	-	h	h	h	a	h	a	a	h	a	a	-
*scaffold210_591622C	h	h	h	h	h	a	a	h	a	a	a	a	a	a	a	a	h	h	-	a	h	a	a	h	h	a	a	h	a	h	-	h	h	a	a	a	h	-	-	h	h	a	h	a	a	h	a	a	h
*scaffold210_595077C	h	h	h	h	h	a	a	h	a	a	a	a	a	a	a	a	h	h	h	a	h	a	a	h	-	a	a	h	a	h	-	h	h	a	a	a	h	-	-	h	h	a	h	a	a	h	a	a	h
*scaffold210_632468	h	h	h	h	h	a	a	h	a	a	a	a	a	a	a	a	h	h	h	h	h	a	a	h	h	a	a	h	a	h	h	h	h	a	a	a	h	h	h	h	h	a	h	a	a	h	a	a	h
*scaffold211_167364	a	h	h	h	h	a	h	a	a	a	h	a	a	h	h	a	a	a	h	h	h	h	h	a	a	a	a	h	a	a	a	a	a	a	h	a	h	h	a	a	h	a	h	h	a	a	h	h	h
*scaffold211_189360C	a	h	h	-	h	a	h	a	a	a	h	a	a	h	-	a	a	a	h	a	h	h	h	a	a	a	a	h	a	a	a	a	a	a	h	a	h	-	a	a	h	a	h	h	a	a	h	h	h
*scaffold211_212079C	a	h	-	-	-	a	h	a	a	a	h	a	a	h	-	a	a	a	h	a	h	h	-	a	a	a	a	h	a	a	a	a	a	a	h	a	h	-	a	a	h	a	h	h	a	a	h	h	h
*scaffold211_323323C	a	h	-	h	h	a	h	a	a	h	h	a	a	h	-	a	a	a	h	a	h	h	h	a	a	a	a	h	h	a	a	a	a	a	h	a	h	h	a	a	h	a	h	h	h	a	h	h	h
*scaffold211_353098	a	h	h	h	h	a	h	a	a	h	h	a	a	h	h	a	a	a	h	-	h	h	h	a	a	a	a	h	h	a	a	a	a	a	h	a	h	h	a	a	h	a	h	h	h	a	h	h	h
*scaffold211_353185	a	h	h	h	h	a	h	a	a	h	h	a	-	h	h	a	-	a	h	h	h	h	h	a	a	a	a	h	h	a	a	a	a	a	h	a	h	h	a	a	h	a	h	h	h	a	h	h	h
*scaffold211_364415	a	h	h	h	h	a	h	a	a	h	h	a	a	h	-	a	a	-	h	-	h	h	h	a	a	a	a	-	h	a	a	a	a	a	h	a	h	h	a	a	h	a	h	h	h	a	h	h	h
*scaffold211_390245C	a	h	h	h	h	a	h	a	-	h	h	a	a	h	h	a	a	a	h	a	h	h	h	a	a	a	a	h	h	a	a	a	a	a	h	a	h	h	a	a	h	a	h	h	h	a	h	h	h
*scaffold212_1053446	h	a	a	h	-	a	h	h	a	h	h	a	a	a	a	a	h	h	h	-	a	-	h	h	h	h	h	a	h	h	a	h	a	h	h	a	h	a	a	h	a	h	h	h	a	a	h	h	a
*scaffold212_1053524	h	a	-	h	-	a	h	h	a	h	h	a	a	a	a	a	h	h	h	-	a	-	h	h	h	h	h	a	h	h	a	h	a	h	h	a	h	a	a	h	a	h	h	h	a	a	h	h	a
*scaffold212_123342C	h	a	a	a	a	a	h	h	a	h	h	a	a	a	a	a	h	-	h	a	a	a	h	h	h	h	h	a	h	h	a	h	a	h	h	a	h	a	a	h	a	h	h	h	a	a	h	h	a
*scaffold212_1302266	h	a	a	h	a	a	h	h	a	h	h	a	a	a	a	a	h	h	h	-	a	a	h	h	h	h	h	a	h	h	a	h	-	h	h	a	h	-	a	h	a	h	h	h	a	a	h	h	a
*scaffold212_93505	h	a	a	-	-	a	h	h	a	h	h	a	a	-	a	a	h	h	h	h	a	-	h	h	h	h	h	a	h	h	-	h	a	h	h	a	h	-	-	h	a	h	h	h	a	a	h	h	a
*scaffold213_138859C	a	h	h	-	h	a	a	h	h	a	h	a	a	a	h	a	a	h	a	a	h	a	h	a	a	a	h	h	h	a	h	a	h	h	a	a	a	h	h	a	a	a	h	a	-	h	a	h	h
*scaffold213_470661C	a	h	h	-	h	a	a	h	h	h	-	a	a	a	-	a	a	h	a	a	h	a	h	a	a	a	h	h	h	a	-	a	h	h	a	a	a	-	h	a	a	a	h	a	a	h	a	h	h
*scaffold213_538587C	a	h	h	-	-	a	a	h	h	h	-	a	a	a	-	a	a	h	a	a	h	a	h	a	a	a	h	h	h	a	-	a	h	h	a	a	a	h	h	a	a	a	h	a	a	h	a	h	h
*scaffold213_557052	a	-	h	h	h	a	a	h	h	h	-	a	a	a	-	a	a	h	a	-	h	-	h	a	a	a	h	h	h	a	h	a	h	h	a	a	a	h	h	a	a	a	h	a	a	h	a	h	h
*scaffold213_586538	a	h	h	h	h	a	a	h	h	h	h	a	a	a	h	a	a	h	a	-	h	a	h	a	a	a	h	h	h	a	h	a	h	h	a	a	a	h	h	a	a	a	h	a	a	h	a	h	h
*scaffold214_674304	h	a	h	-	a	a	a	a	h	h	a	a	a	a	h	a	a	a	h	h	a	-	a	a	a	a	h	h	h	h	h	h	a	h	h	h	h	a	h	a	a	h	h	h	h	h	a	h	h
*scaffold214_674307	h	a	h	-	a	a	a	a	h	h	a	a	a	a	h	a	a	a	h	h	a	-	a	a	a	a	h	h	h	h	h	h	a	h	h	h	h	a	h	a	a	h	h	h	h	h	a	h	h
*scaffold214_674312	h	a	h	-	a	a	a	a	h	h	a	a	a	a	h	a	a	-	h	h	a	-	a	a	a	a	h	h	h	h	h	h	a	h	h	h	h	a	h	a	a	h	h	h	h	h	a	h	h
*scaffold216_123965	a	a	h	-	h	h	a	a	a	h	h	a	a	a	a	a	a	a	a	h	h	h	h	a	h	a	h	h	a	h	h	a	a	h	h	a	a	h	h	a	h	h	h	h	h	h	h	a	h
*scaffold216_245966	a	a	h	-	h	h	a	a	a	h	h	a	a	a	a	a	a	-	a	h	h	h	h	a	h	a	h	h	a	h	h	a	a	h	h	a	a	h	h	a	h	h	h	h	h	h	h	a	h
*scaffold216_292303C	a	a	h	-	h	h	-	a	a	h	h	a	a	-	a	a	a	a	a	-	h	-	h	a	h	a	h	h	a	h	-	a	a	h	h	a	a	h	h	-	h	h	h	h	h	h	h	a	h
*scaffold216_292328	a	a	h	-	h	h	a	a	a	h	h	a	a	a	a	a	a	a	a	h	h	h	h	a	h	a	h	h	a	h	h	a	a	h	h	a	-	h	h	a	h	h	h	h	h	h	h	a	h
*scaffold216_292439C	a	a	h	-	h	h	-	a	a	h	h	a	a	-	a	a	a	a	a	-	h	-	h	a	h	a	h	h	a	h	-	a	a	h	h	a	a	-	h	a	h	h	h	h	h	h	h	a	h
*scaffold216_292445C	a	a	h	-	h	h	-	a	a	h	h	a	a	-	a	a	a	a	a	-	h	-	h	a	h	a	h	h	a	h	-	a	a	h	h	a	a	h	h	a	h	h	h	h	h	h	h	a	h
*scaffold216_47502	a	a	h	-	h	h	a	a	a	h	h	a	-	-	a	a	-	a	a	h	h	h	h	a	h	a	h	h	a	h	h	a	a	h	h	-	a	h	h	a	h	h	h	h	h	h	h	a	h
*scaffold217_143502C	h	a	a	a	h	h	h	a	a	h	a	a	a	h	h	a	-	a	h	a	a	-	a	h	h	a	a	a	h	h	h	a	h	h	h	a	h	-	-	a	h	a	a	h	h	a	a	a	h
*scaffold217_146396C	-	a	a	a	h	h	h	a	a	-	a	a	a	-	h	a	h	a	h	a	a	-	a	h	h	a	a	a	-	h	-	a	h	h	h	a	h	h	-	a	h	a	a	h	h	a	a	a	h
*scaffold217_190847	h	a	a	-	h	h	h	a	a	h	a	a	a	h	h	a	h	a	h	-	a	h	a	h	h	a	a	a	h	h	h	a	h	h	h	a	h	h	h	a	h	a	a	h	h	a	a	a	h
*scaffold217_458875	h	a	-	-	h	h	h	a	a	h	-	a	a	h	h	a	h	a	h	-	a	h	a	h	h	a	a	a	h	h	h	a	h	h	h	a	h	h	h	a	h	a	a	h	h	a	a	a	h
*scaffold217_458968	h	a	-	-	h	h	h	a	a	h	-	a	a	h	h	a	h	a	h	-	a	h	a	h	h	a	a	a	h	h	h	a	a	h	h	a	h	h	h	a	h	a	a	h	h	a	a	a	h
*scaffold217_65882	h	a	-	-	h	h	h	a	a	h	a	a	a	h	h	a	h	-	h	-	a	h	a	h	h	a	a	a	h	h	h	a	h	h	h	a	h	h	h	a	h	-	h	h	h	a	a	a	h
*scaffold218_147682	h	h	h	a	h	a	a	a	a	h	h	h	h	h	a	a	a	a	a	h	h	-	h	a	h	a	h	h	h	h	h	a	h	h	h	a	a	-	h	a	h	h	h	h	a	h	h	a	h
*scaffold218_161924C	h	h	h	a	h	a	a	a	a	h	h	h	h	h	a	a	a	a	a	-	h	a	h	a	h	a	h	h	h	h	-	a	h	h	h	a	a	a	h	a	h	h	h	h	a	h	h	a	h
*scaffold218_275996C	h	h	-	a	-	a	h	a	a	h	h	h	-	h	a	a	a	a	a	a	h	a	h	a	h	a	h	h	h	h	h	a	h	h	h	a	a	a	h	a	h	h	h	h	a	h	h	a	h
*scaffold218_376009	h	h	h	a	h	a	h	a	a	h	h	h	h	h	a	a	a	a	a	h	h	-	h	a	h	a	h	h	h	h	h	a	h	h	h	a	a	a	h	a	h	h	h	h	a	h	h	a	h
*scaffold218_378407C	h	h	h	a	h	a	h	-	a	-	h	h	h	h	a	a	a	a	a	-	h	a	h	a	h	a	h	h	h	-	-	a	h	-	-	a	a	a	h	a	h	-	h	h	a	h	-	a	h
*scaffold218_437344C	h	h	-	a	-	a	h	a	a	h	h	h	-	-	a	a	a	a	a	a	h	a	h	a	h	a	h	h	h	h	-	a	h	h	h	a	a	a	h	a	h	h	h	h	a	h	h	a	h
*scaffold218_68927C	h	h	h	a	h	a	a	a	a	h	h	h	-	h	-	a	a	a	a	-	h	a	h	a	h	a	h	h	h	h	-	a	h	h	h	a	a	a	-	a	h	h	h	h	a	h	h	a	h
*scaffold218_69021C	h	h	h	a	h	a	a	a	a	h	h	h	-	h	a	a	a	a	a	-	h	a	-	a	h	-	h	h	h	h	-	a	h	h	h	a	a	-	-	a	h	h	h	h	a	h	h	a	h
*scaffold219_169666	a	a	a	-	a	a	h	h	a	h	h	a	a	a	h	a	h	h	h	a	a	a	h	h	h	h	a	a	h	h	a	h	h	h	h	a	h	a	a	h	a	h	h	h	h	a	h	h	a
*scaffold219_411923C	a	a	a	a	a	a	h	h	a	h	h	a	a	a	h	a	h	h	h	a	a	a	h	h	h	h	a	a	h	h	a	h	h	h	h	a	h	a	a	h	a	h	h	h	h	a	h	h	a
*scaffold22_1718892	a	h	-	-	h	a	h	a	h	h	h	a	-	a	a	a	-	-	a	h	h	-	a	h	a	h	h	h	h	a	-	a	a	a	h	h	a	h	h	a	h	a	a	a	h	a	h	h	a
*scaffold22_1718893	a	h	-	-	h	a	h	a	h	h	h	-	-	a	a	a	a	-	a	h	h	-	a	h	a	h	h	h	h	a	-	a	a	a	h	h	a	h	h	a	h	a	a	a	h	a	h	h	a
*scaffold22_1779529C	a	h	a	a	h	a	h	a	h	h	h	a	a	a	a	a	a	a	a	-	h	a	a	h	a	h	h	h	h	a	a	a	a	a	h	h	a	-	-	a	h	a	a	a	h	a	h	h	a
*scaffold22_282797C	a	h	a	a	h	a	a	a	h	h	h	a	a	a	a	a	a	a	a	h	a	a	a	h	a	h	h	h	h	a	a	a	a	a	h	-	a	-	-	a	h	a	a	a	h	a	h	h	a
*scaffold22_357225	a	h	a	-	h	a	a	a	h	h	h	a	a	-	-	a	a	a	a	h	a	-	a	h	a	h	h	h	h	a	a	a	a	a	h	h	a	h	h	a	h	a	a	a	h	a	h	h	a
*scaffold22_476439	a	h	a	-	h	a	h	a	h	h	h	a	a	-	-	a	a	-	a	h	a	-	a	h	a	h	h	h	h	a	a	a	a	a	h	h	a	h	h	a	h	a	a	a	h	a	h	h	a
*scaffold22_807887C	a	h	a	a	-	a	h	a	h	h	h	a	a	a	a	a	a	a	a	-	h	a	a	h	a	h	-	h	h	a	a	a	a	a	h	h	a	-	h	a	h	a	a	a	h	a	h	h	a
*scaffold22_807986C	a	h	a	a	-	a	h	a	h	h	h	a	a	a	a	a	a	a	a	-	h	a	a	h	a	h	-	h	-	a	a	a	a	a	-	h	-	-	h	a	h	a	a	a	h	a	h	h	a
*scaffold22_808010C	a	h	a	a	-	a	h	a	h	h	h	a	a	a	a	a	a	a	a	-	h	a	a	h	a	h	-	h	h	a	a	a	a	a	-	h	-	-	h	a	h	a	a	a	h	a	h	h	a
*scaffold22_816799C	a	h	a	a	h	a	h	a	h	h	h	a	a	a	a	a	a	a	a	-	h	a	a	h	a	h	h	h	h	a	a	a	a	a	-	-	a	-	-	a	h	a	a	a	h	a	h	h	a
*scaffold22_867353	a	h	a	a	h	a	-	a	h	h	h	a	a	a	a	a	a	a	-	h	h	a	a	h	a	h	h	h	h	a	-	-	a	a	h	h	a	h	h	a	h	a	a	a	h	a	h	h	a
*scaffold22_928419	a	h	a	a	h	a	h	a	-	h	h	a	a	-	a	a	a	a	a	h	h	-	a	h	a	h	h	h	h	a	-	a	a	a	h	h	a	h	h	a	h	a	a	a	h	a	h	h	a
*scaffold22_928545C	a	h	a	a	h	a	h	a	h	-	h	a	a	a	a	a	a	a	a	-	h	a	a	h	a	h	h	h	h	a	a	a	a	a	h	-	a	h	h	a	h	a	a	a	h	a	h	h	a
*scaffold221_44635C	h	a	a	-	h	h	h	h	h	a	h	h	h	h	h	a	h	a	a	-	h	a	-	h	a	-	h	h	a	a	-	a	h	a	-	a	a	-	a	a	a	-	a	h	h	h	a	h	a
*scaffold221_45594	h	a	-	h	h	h	h	h	h	a	h	h	h	h	h	a	h	-	a	h	h	-	h	h	-	h	h	h	a	a	h	a	h	a	h	a	a	h	-	a	a	h	a	h	h	h	a	h	a
*scaffold221_45595	h	a	-	h	h	h	h	h	h	a	h	h	h	h	h	a	h	-	a	h	h	-	h	h	-	h	h	h	a	a	h	a	h	a	h	a	a	h	-	a	a	h	a	h	h	h	a	h	a
*scaffold222_140733C	h	h	h	-	h	a	a	h	a	a	a	a	a	a	a	a	h	a	a	a	h	a	a	h	h	a	a	h	a	h	h	h	h	a	a	a	h	-	h	h	h	a	h	a	a	h	a	a	h
*scaffold222_241931	h	h	h	h	h	a	a	h	a	a	a	a	a	a	a	a	h	a	h	-	h	a	-	h	h	a	a	h	a	h	h	h	h	a	a	-	h	h	h	h	h	a	h	a	a	h	a	a	h
*scaffold222_49004C	h	h	-	-	-	a	a	h	a	a	a	a	a	a	a	a	h	a	a	a	h	a	a	h	h	a	a	h	a	h	-	h	h	a	a	a	a	-	-	h	h	a	h	a	a	h	a	a	h
*scaffold223_289630	a	h	a	h	a	a	h	a	h	a	h	a	a	a	a	h	a	h	h	h	h	-	a	h	-	h	a	h	a	h	h	-	h	a	a	h	h	a	a	h	h	h	h	a	h	h	a	a	h
*scaffold223_349141C	a	h	a	-	a	a	-	a	h	a	-	a	a	a	a	h	a	-	h	-	h	a	a	h	h	h	a	h	a	h	-	a	h	a	a	-	h	a	a	h	h	h	h	a	h	h	a	a	h
*scaffold223_361173C	a	h	a	-	a	a	h	a	h	a	h	a	a	a	a	h	a	h	h	-	h	a	a	h	h	h	a	h	a	h	h	a	h	a	a	h	h	a	a	h	h	h	h	a	h	h	a	a	h
*scaffold223_366988C	a	h	a	-	a	a	h	a	h	a	h	a	-	a	a	h	a	-	h	a	h	a	a	h	h	h	a	h	a	h	-	a	h	a	a	-	h	a	a	h	h	h	h	a	h	h	a	a	h
*scaffold223_500233	a	h	a	h	a	a	h	a	h	a	h	a	a	a	a	h	a	h	h	h	h	a	a	h	h	h	a	h	a	h	h	a	h	a	a	h	h	-	a	h	h	h	h	a	h	h	a	a	h
*scaffold223_500236	a	h	a	h	a	a	h	a	h	a	h	a	a	a	a	h	a	h	h	h	h	-	a	h	h	h	a	h	a	h	h	a	h	a	a	h	h	-	a	h	h	h	h	a	h	h	a	a	h
*scaffold224_219102C	h	a	h	a	a	a	a	a	h	h	a	a	a	a	h	a	a	a	h	-	h	a	a	a	a	a	h	h	h	h	-	h	a	h	h	h	h	a	h	a	a	-	h	h	h	h	a	h	h
*scaffold229_350828	a	h	a	h	a	a	h	a	h	h	h	a	a	a	-	h	a	h	h	-	a	a	h	h	a	h	-	h	a	h	h	a	h	a	a	h	h	-	a	h	h	h	h	a	h	h	a	a	h
*scaffold229_514330C	a	h	a	h	a	a	h	-	h	h	h	a	a	a	a	h	a	h	h	-	a	a	h	h	a	h	a	h	a	h	-	a	h	a	a	h	h	a	a	h	h	h	h	a	h	h	a	a	h
*scaffold229_514470	a	h	a	-	-	a	h	a	h	h	h	a	a	a	a	h	a	-	h	h	a	-	h	-	a	-	a	h	a	h	h	-	h	a	a	h	h	-	a	h	h	h	h	a	h	h	a	a	h
*scaffold23_1163952	a	h	a	-	h	h	h	a	a	h	a	a	a	h	a	a	a	a	a	h	h	h	h	a	a	a	a	a	a	h	a	a	-	a	h	a	a	a	a	a	h	h	h	h	a	h	-	a	h
*scaffold23_1164054	a	h	a	-	h	h	h	a	a	h	a	a	a	h	a	a	a	a	a	h	h	h	h	a	a	a	a	a	a	h	a	a	h	a	h	a	a	a	a	a	h	h	h	h	a	h	h	a	h
*scaffold23_1164060C	a	h	a	a	-	h	h	a	a	h	a	a	a	h	a	a	a	a	a	-	h	h	h	a	a	a	a	a	a	h	a	a	h	a	h	a	a	a	a	a	h	h	h	h	a	h	h	a	h
*scaffold23_1176245	a	h	a	-	h	h	h	a	a	h	a	a	a	h	a	a	a	a	a	h	h	h	h	a	a	a	a	a	a	h	a	a	h	a	h	a	a	a	a	a	h	h	h	h	a	h	h	a	h
*scaffold23_1182370	a	h	a	a	h	h	h	a	a	h	a	a	a	h	a	a	a	a	a	h	h	h	h	a	a	a	a	a	a	h	a	a	h	a	h	a	a	a	a	a	h	h	h	h	a	h	h	a	h
*scaffold23_1413758C	a	h	a	a	h	h	h	a	a	h	a	a	a	h	-	a	a	a	a	-	h	h	h	a	a	a	a	a	a	h	a	a	h	a	h	a	a	a	a	a	h	h	h	h	a	h	h	a	h
*scaffold23_1413875	a	h	a	-	h	h	h	a	a	h	a	a	-	h	a	a	-	a	a	h	h	h	h	a	a	a	a	a	a	h	-	a	h	a	h	a	a	-	a	a	h	-	h	h	a	h	h	a	h
*scaffold23_1413882	a	h	a	-	h	h	h	a	a	h	a	a	-	h	a	a	-	a	a	h	h	h	h	a	a	a	a	a	a	h	-	a	h	a	h	a	a	-	a	a	h	-	h	h	a	h	h	a	h
*scaffold23_1414776	a	h	-	-	h	h	h	a	a	h	a	a	-	h	-	a	a	-	a	h	h	h	h	a	a	a	a	a	a	h	-	a	h	a	h	a	a	a	-	a	h	h	h	h	a	h	h	a	h
*scaffold23_172251C	a	h	a	a	h	h	h	-	a	h	a	a	a	h	a	a	a	a	a	-	a	h	h	a	a	a	a	a	a	h	a	a	h	a	h	a	a	h	a	a	h	h	h	h	a	h	h	a	h
*scaffold23_172431	a	h	a	a	h	h	h	a	a	h	a	a	a	h	a	a	a	a	a	h	a	h	h	a	a	a	a	a	a	h	a	a	h	a	h	a	a	h	a	a	h	h	h	h	a	h	h	a	h
*scaffold23_2043006	a	h	a	-	h	h	h	a	a	h	-	a	a	h	a	a	-	a	a	h	h	h	h	a	a	a	a	a	a	h	-	a	h	a	h	a	a	-	a	a	h	h	h	a	a	h	h	a	h
*scaffold23_311492	a	h	a	a	h	h	h	a	a	h	a	a	a	h	a	a	a	a	-	h	a	h	h	a	a	a	a	a	a	h	a	a	h	a	h	a	a	-	a	a	h	h	h	h	a	h	h	a	h
*scaffold23_445342C	a	h	a	a	h	h	h	a	a	h	a	a	a	h	a	a	a	a	a	-	a	h	h	a	a	a	a	a	a	h	a	-	h	a	h	-	a	a	a	a	h	h	h	h	a	h	h	a	h
*scaffold23_472756	a	-	a	a	h	h	-	a	a	h	a	a	a	h	a	a	a	a	a	h	a	h	h	a	a	a	a	a	a	h	a	a	h	a	h	a	a	-	-	a	h	h	h	h	a	h	h	a	h
*scaffold23_540270C	a	h	a	a	h	h	h	a	a	h	a	a	a	h	a	a	a	a	a	-	a	h	h	a	a	a	a	a	a	h	a	a	h	a	h	a	a	a	a	a	h	h	h	h	a	h	h	a	h
*scaffold23_540311	a	h	a	-	h	h	h	a	a	h	a	a	a	h	a	a	a	a	a	h	a	h	h	a	a	a	a	a	a	h	-	a	h	a	h	a	a	a	a	a	h	h	h	h	a	h	h	a	h
*scaffold23_565127	a	h	-	-	h	h	h	a	a	h	a	a	-	h	a	a	a	a	a	h	a	h	h	a	a	a	a	a	a	h	a	a	h	a	h	a	a	a	-	a	h	h	h	h	a	h	h	a	h
*scaffold230_114029	a	a	-	h	-	a	h	a	h	h	a	h	h	a	a	a	h	a	a	h	a	h	a	h	h	h	a	a	h	h	-	a	h	a	a	a	a	h	h	a	a	a	a	a	a	a	a	h	h
*scaffold230_583751	a	h	-	h	-	a	h	a	h	h	a	h	h	-	-	a	h	-	a	h	a	h	a	h	h	h	a	a	h	-	-	a	h	a	a	a	a	h	h	a	a	h	a	a	a	a	a	h	h
*scaffold230_647620	a	h	a	h	a	a	h	a	h	h	a	h	h	a	a	a	h	a	a	h	a	h	a	h	h	h	a	a	h	h	a	a	h	a	a	a	a	h	h	a	a	h	a	a	a	a	a	h	h
*scaffold230_88511C	a	a	a	-	a	a	h	a	h	h	a	h	h	a	a	a	h	a	a	-	a	h	a	h	h	h	a	a	h	h	a	a	h	a	a	a	a	h	h	a	a	a	a	a	a	a	a	h	h
*scaffold232_297776	a	h	-	h	a	a	h	a	h	h	h	a	-	a	-	h	a	h	h	h	a	-	h	h	h	h	a	h	a	h	h	a	h	a	a	h	h	-	a	h	h	h	h	a	h	h	a	a	h
*scaffold233_129709C	h	a	-	a	a	a	a	a	a	a	a	h	h	-	a	a	a	-	h	-	h	a	h	h	a	a	a	h	a	a	-	h	h	h	a	h	h	-	h	h	a	h	a	a	a	a	a	h	h
*scaffold233_151568	h	a	h	a	a	a	a	a	a	a	a	h	h	h	a	a	a	h	h	h	h	-	h	h	a	a	a	h	a	a	h	h	h	h	-	h	h	h	h	h	a	h	a	a	a	a	a	h	h
*scaffold233_592577	h	a	h	-	a	a	a	a	a	a	a	h	h	h	a	a	a	-	h	h	h	a	h	h	a	a	a	h	a	a	h	h	h	h	a	h	h	h	h	h	a	h	a	a	a	a	a	h	h
*scaffold233_616687	h	a	h	-	a	a	a	a	a	a	a	h	h	h	a	a	a	a	h	h	h	-	h	h	a	a	a	h	a	-	h	h	h	h	h	h	h	h	h	h	a	h	a	a	a	a	a	h	h
*scaffold233_654284C	h	a	h	a	a	a	a	a	a	a	a	h	-	h	a	a	a	a	h	-	h	a	-	h	a	a	a	h	a	a	h	h	h	h	a	-	h	-	h	h	a	h	a	a	a	a	a	h	h
*scaffold233_654378C	h	a	h	a	a	a	a	a	a	a	a	-	h	h	a	a	a	a	-	-	h	a	-	h	a	a	a	h	a	a	h	h	h	h	a	-	h	-	h	h	a	h	a	a	a	a	a	h	h
*scaffold233_654388C	h	a	h	a	a	a	a	a	a	a	a	h	h	h	a	a	a	a	-	-	h	a	-	h	a	a	a	h	a	a	h	h	h	h	a	-	h	-	h	h	a	h	a	a	a	a	a	-	h
*scaffold233_673397	h	a	h	-	a	a	a	a	a	a	a	h	h	h	a	a	a	a	h	h	h	-	h	h	a	a	a	h	a	-	-	h	h	h	a	h	h	h	h	h	a	h	a	a	a	a	a	h	h
*scaffold233_68031	h	a	h	-	a	a	a	a	a	a	a	h	h	h	-	a	-	h	h	h	h	a	h	h	a	a	a	h	a	a	h	h	h	h	a	h	h	h	h	h	a	h	a	a	a	a	a	h	h
*scaffold234_101951C	a	h	a	a	a	a	h	a	h	h	h	a	a	a	a	a	a	a	a	-	h	a	a	h	a	h	h	h	a	a	a	a	a	a	h	h	a	h	h	a	h	a	a	a	h	a	h	h	a
*scaffold234_148068C	a	h	a	a	h	a	h	a	h	h	h	a	a	a	a	a	a	a	a	-	h	a	a	h	a	h	h	h	a	a	a	a	a	a	h	h	a	h	h	a	h	a	a	a	h	a	h	h	a
*scaffold234_243480	a	h	a	-	h	a	h	a	h	h	h	a	a	a	a	a	a	a	h	h	h	-	-	h	a	h	h	h	a	a	a	-	a	a	h	h	a	h	h	a	h	a	a	a	h	a	h	h	a
*scaffold234_609832C	a	h	a	a	h	a	h	a	h	h	h	a	a	a	a	a	a	a	a	-	h	a	a	h	a	h	h	h	a	a	a	a	a	a	-	h	a	-	h	a	h	a	a	a	h	a	h	h	a
*scaffold234_865446C	a	h	a	a	h	a	h	a	h	h	h	a	a	a	a	a	a	a	a	-	h	a	a	h	a	h	h	h	a	a	a	a	a	a	h	h	a	-	h	a	h	a	a	a	h	a	h	h	a
*scaffold234_873205C	a	h	a	a	-	a	h	a	h	h	h	a	a	a	a	a	a	a	a	-	h	a	a	h	a	h	-	h	a	a	a	a	a	a	h	-	a	-	-	a	h	a	a	a	h	a	-	h	a
*scaffold234_947882C	a	h	a	a	h	a	h	a	h	h	h	a	a	a	a	a	a	a	a	a	h	a	a	h	a	h	h	h	a	a	a	a	a	a	-	h	a	h	h	a	h	a	a	a	h	a	h	h	a
*scaffold236_244574	a	a	-	h	h	h	a	h	a	a	a	a	a	h	a	a	h	a	a	-	h	h	h	a	a	a	a	a	a	h	a	a	h	a	h	h	a	a	-	h	a	-	a	a	h	h	a	a	h
*scaffold236_340908	a	a	a	h	h	h	a	h	a	a	a	a	a	h	a	a	h	a	a	-	h	h	h	a	a	a	a	a	a	h	a	a	h	a	h	h	a	a	a	h	a	a	a	a	h	-	a	a	h
*scaffold24_1256505C	h	a	a	a	h	a	-	a	a	a	a	h	h	h	a	a	h	a	h	h	h	a	h	h	a	a	a	h	a	a	h	h	h	a	a	h	h	a	h	a	a	h	a	a	a	a	a	h	-
*scaffold24_1560883	h	a	a	a	h	a	a	a	a	h	a	h	h	h	a	a	h	a	h	h	h	a	h	h	a	a	a	h	a	a	h	h	h	a	a	h	h	a	h	a	a	h	a	a	a	a	a	h	a
*scaffold24_358605C	h	a	a	a	a	a	a	a	a	a	a	h	h	-	a	a	a	a	h	-	-	a	h	h	a	a	a	h	a	a	h	h	h	a	a	h	h	a	h	a	a	h	a	a	a	a	a	h	a
*scaffold24_366674C	h	a	a	a	a	a	a	a	a	a	a	h	h	h	a	a	a	a	h	-	h	a	h	h	a	a	a	h	a	a	-	h	-	a	a	h	h	a	h	a	a	h	a	a	a	a	a	h	a
*scaffold24_376782C	h	a	a	a	a	a	a	a	a	a	a	h	-	h	a	a	a	a	h	-	h	a	h	h	a	a	a	h	a	a	-	h	h	a	a	-	h	a	h	a	a	h	a	a	a	a	a	h	a
*scaffold24_534719	h	a	-	-	-	a	a	a	a	a	-	h	h	h	-	a	-	-	h	h	h	-	h	h	a	a	a	h	a	a	h	h	h	a	a	h	h	a	h	a	a	h	a	a	a	a	a	h	a
*scaffold24_639275	h	a	a	a	h	a	a	a	a	a	a	h	h	h	a	a	a	a	h	h	h	a	h	h	a	a	a	h	a	a	h	h	h	a	a	h	h	a	h	a	a	h	a	a	a	a	a	h	a
*scaffold24_972292C	h	a	a	a	h	a	a	a	a	a	a	h	h	h	a	-	h	a	h	-	h	a	h	h	a	a	a	h	a	a	h	h	h	a	a	h	h	a	h	a	a	h	a	a	a	a	a	h	a
*scaffold24_972429	h	a	a	a	h	a	a	a	a	a	a	h	h	h	a	a	h	a	h	h	h	-	h	h	a	a	a	h	a	a	h	h	h	a	a	h	h	-	h	a	a	h	a	a	a	a	a	h	a
*scaffold240_243981C	h	a	a	h	h	-	h	h	h	a	h	a	a	h	h	a	h	a	a	a	h	a	-	h	a	h	h	h	a	a	h	-	h	a	h	a	a	-	a	a	a	h	a	h	h	h	a	h	a
*scaffold240_270502C	h	a	a	h	-	h	h	h	h	a	h	a	a	h	h	a	h	a	a	-	h	a	h	h	a	h	h	h	a	a	h	a	h	a	-	a	a	-	a	a	a	h	a	h	h	h	a	h	a
*scaffold240_470264C	h	a	a	-	-	h	h	h	h	a	h	h	-	-	h	a	-	a	a	-	h	a	h	h	a	h	h	h	a	a	h	a	h	a	h	a	a	h	a	a	a	h	a	h	h	h	a	h	a
*scaffold240_477534	h	a	a	h	h	-	h	h	h	a	h	h	h	h	h	a	h	-	a	h	h	a	h	h	a	h	h	h	a	a	h	a	h	a	h	a	a	h	a	a	a	h	a	h	h	h	a	h	a
*scaffold240_549317	h	a	-	h	h	h	h	h	h	a	h	h	h	h	h	a	h	a	a	h	h	-	h	h	a	h	h	h	a	a	h	a	h	-	h	a	a	h	-	a	a	h	a	h	h	h	a	h	a
*scaffold240_550307	h	a	-	h	h	-	h	h	h	a	h	h	h	h	h	a	h	a	a	h	h	-	h	h	a	h	h	h	a	a	h	a	h	a	h	a	a	h	a	a	a	h	a	h	h	h	a	h	a
*scaffold240_550372	h	a	-	h	h	h	h	h	h	a	h	h	h	h	h	a	h	-	a	h	h	-	h	h	a	h	h	h	a	a	h	a	h	a	h	a	a	h	-	a	a	h	a	h	h	h	-	h	a
*scaffold240_582728	h	a	a	h	h	h	h	h	h	a	h	h	h	h	h	a	h	a	a	h	h	a	h	h	a	h	h	h	a	a	h	a	h	a	h	a	a	h	a	a	a	h	a	h	h	h	a	h	a
*scaffold240_582729	h	a	a	h	h	h	h	h	h	a	h	h	h	h	h	a	h	a	a	h	h	a	h	h	a	h	h	h	a	a	h	a	h	a	h	a	a	h	a	a	a	h	a	h	h	h	a	h	a
*scaffold242_267462	h	a	a	h	-	a	a	h	a	-	h	a	a	a	-	a	h	h	h	-	a	a	h	h	a	h	h	a	h	a	a	a	a	a	h	a	h	a	a	h	a	h	h	h	a	a	h	h	a
*scaffold242_296806C	h	a	-	-	a	a	a	h	a	h	h	a	a	a	a	a	-	-	h	a	a	a	h	h	a	h	h	a	h	a	a	a	a	a	h	a	h	a	a	h	a	-	h	h	a	a	h	h	a
*scaffold243_286213C	a	a	-	-	a	a	h	a	a	h	-	a	a	-	-	a	-	a	h	a	a	a	a	h	h	h	h	a	a	h	a	a	h	a	h	h	h	a	-	a	a	-	h	a	h	h	a	a	a
*scaffold243_30026C	a	a	h	h	a	a	h	a	a	h	h	a	a	h	h	a	h	h	h	a	a	a	a	h	h	h	h	a	a	h	a	a	h	a	h	h	h	a	h	a	a	a	h	a	h	h	a	a	a
*scaffold243_439785C	a	a	h	h	a	a	h	a	a	h	h	a	a	-	h	a	h	a	h	a	a	a	a	h	h	h	h	a	a	h	a	a	h	a	h	h	h	a	h	a	a	a	h	a	h	h	a	a	a
*scaffold243_444878C	a	a	-	-	a	a	h	a	a	-	h	a	a	h	-	a	-	a	h	a	a	a	a	h	h	h	h	a	a	h	a	a	h	a	h	h	h	a	h	a	a	a	h	a	h	h	a	a	a
*scaffold243_510943C	a	a	-	-	a	a	h	a	-	h	h	a	a	h	h	a	-	a	h	a	a	a	a	h	h	h	h	-	a	h	a	a	h	a	h	h	h	a	h	a	a	a	h	a	h	h	a	a	a
*scaffold243_510951	a	a	h	h	a	a	-	a	a	h	h	a	a	h	h	a	h	a	h	-	a	-	a	h	h	h	h	a	a	h	a	a	h	a	h	h	h	a	h	a	a	a	h	a	h	h	a	a	a
*scaffold244_247413C	a	a	a	a	a	a	h	h	a	h	h	a	a	a	h	a	h	-	h	a	a	a	h	h	h	h	-	a	h	h	a	h	h	h	h	a	h	a	a	h	a	h	h	h	h	a	h	h	a
*scaffold244_311212	a	a	a	-	a	a	h	h	a	h	h	a	a	a	h	a	h	h	h	h	a	a	h	h	h	h	h	a	h	h	-	h	h	h	h	a	h	a	a	h	a	h	h	h	h	a	h	h	a
*scaffold244_429439C	a	a	a	a	a	a	h	h	a	h	h	a	a	a	h	-	h	h	h	a	-	a	h	h	h	h	a	a	h	-	a	h	h	h	h	a	h	a	a	h	a	h	h	h	h	a	h	h	a
*scaffold244_429877	a	a	a	a	a	a	h	h	a	h	h	a	a	-	h	a	h	h	h	-	a	-	h	h	h	h	a	a	h	h	-	h	h	h	h	a	h	-	a	h	a	h	h	h	h	a	h	h	a
*scaffold244_604265C	a	a	a	a	a	a	h	h	a	h	h	a	a	a	h	a	h	h	h	a	a	a	h	h	h	h	a	a	h	h	a	h	h	h	h	a	h	a	a	h	a	h	h	h	h	a	h	h	a
*scaffold244_604290C	a	a	a	a	a	a	h	h	a	h	h	a	a	a	h	a	h	h	h	a	a	a	h	h	h	-	a	a	h	h	a	h	h	h	h	a	h	a	a	h	a	h	h	h	h	a	h	h	a
*scaffold244_615793	a	a	a	-	a	a	h	h	a	h	h	a	a	a	h	a	h	h	h	a	a	-	h	h	h	h	a	a	h	h	-	h	h	h	h	a	h	-	a	h	a	h	h	h	h	a	h	h	a
*scaffold244_615923	a	a	a	-	a	a	h	h	a	h	h	a	a	a	h	a	h	h	h	a	a	a	h	h	h	h	a	a	h	h	-	h	h	h	h	a	h	-	-	h	a	h	h	h	h	a	h	h	a
*scaffold245_238643C	h	a	-	h	h	a	a	h	a	a	a	a	-	h	a	-	h	a	a	a	h	h	h	a	-	h	a	a	a	h	a	a	a	a	h	h	a	a	a	a	h	a	a	a	h	h	a	a	h
*scaffold245_238671C	h	a	-	h	h	a	a	h	a	a	a	a	-	h	a	-	h	a	a	a	h	h	h	a	a	h	a	a	a	h	a	a	a	a	h	h	a	a	a	a	h	a	a	a	h	h	a	a	h
*scaffold245_238674C	h	a	-	h	h	a	a	h	a	a	a	a	-	h	a	-	h	a	a	a	h	h	h	a	a	h	a	a	a	h	a	a	a	a	h	h	a	a	a	a	h	a	a	a	h	h	a	a	h
*scaffold249_360197C	h	a	h	h	h	h	a	h	a	a	a	h	h	a	h	a	h	h	h	a	h	a	h	h	a	h	-	a	a	h	a	a	h	a	h	a	h	a	-	a	-	a	a	a	h	a	h	h	a
*scaffold249_59686	h	a	h	h	h	h	a	h	a	a	a	h	h	a	h	a	h	h	h	-	h	a	h	h	a	h	h	a	a	h	-	a	h	a	h	a	h	-	h	a	h	a	a	a	h	a	h	h	a
*scaffold25_1142287	a	a	h	h	-	a	h	a	a	-	h	a	a	h	h	a	h	a	h	-	a	-	a	h	h	h	h	a	a	a	-	-	h	a	h	h	h	-	h	a	a	-	h	a	h	a	a	a	a
*scaffold25_1164072	a	a	h	h	a	a	-	a	a	a	h	a	a	h	h	a	h	a	h	-	a	-	a	h	h	h	h	a	a	a	-	a	h	a	h	h	h	-	h	a	a	a	h	a	h	a	a	a	a
*scaffold25_1462905	a	a	h	-	a	a	h	a	a	h	h	a	a	h	h	a	h	a	h	-	a	a	-	h	h	h	h	a	a	-	-	a	h	a	h	h	h	a	h	a	a	a	h	a	h	a	a	a	a
*scaffold25_1519388C	a	a	-	-	a	a	h	a	-	h	-	a	a	h	h	a	-	a	h	a	a	a	a	h	h	h	h	a	a	-	a	a	h	a	h	h	h	a	-	a	a	a	h	a	h	a	a	a	a
*scaffold25_1824503	a	a	h	h	a	a	h	a	a	h	h	a	a	h	h	a	h	a	h	-	a	-	a	h	h	h	h	a	a	a	-	a	h	a	h	h	h	-	h	a	a	a	h	a	h	a	-	a	a
*scaffold25_1870561C	a	a	-	-	a	a	h	a	a	h	h	a	a	h	h	a	-	a	h	a	a	a	a	h	h	h	h	a	a	a	a	a	h	a	h	h	h	a	-	a	a	a	h	-	h	a	a	a	a
*scaffold25_2098324	a	-	h	h	-	a	h	a	a	h	h	a	-	h	h	a	h	-	h	-	a	-	a	h	h	h	h	a	a	h	-	a	h	a	h	h	h	-	h	a	a	a	h	a	h	h	a	a	a
*scaffold25_2117075	a	a	h	h	a	a	h	a	a	h	h	a	a	h	h	a	h	a	h	-	a	-	-	h	h	h	h	a	a	h	-	a	h	a	h	h	h	a	h	a	a	a	h	a	h	h	a	a	a
*scaffold25_249438	a	a	h	-	-	-	h	-	a	a	h	a	-	h	h	a	h	a	h	-	a	-	a	h	h	h	h	a	a	a	-	a	h	a	h	h	h	-	h	a	a	a	h	a	h	h	a	a	a
*scaffold25_287042	a	a	h	h	a	a	h	a	a	a	h	a	a	h	h	a	h	a	h	-	a	-	a	h	h	h	h	a	a	a	a	a	h	a	h	h	h	a	h	a	a	a	h	a	h	h	a	a	a
*scaffold25_288838C	a	a	h	-	a	a	h	a	a	a	h	a	a	h	h	a	h	a	h	a	a	a	a	h	h	h	h	a	a	a	a	a	h	a	h	-	h	a	-	a	a	a	h	a	h	h	a	a	a
*scaffold25_495258C	a	-	h	h	a	a	h	a	a	a	h	a	a	h	h	a	h	a	h	a	a	a	a	h	h	h	h	a	-	-	a	a	h	a	h	h	h	a	h	a	a	a	h	a	h	h	a	a	a
*scaffold25_526772	a	a	h	h	a	a	h	a	a	a	h	a	-	h	h	a	h	-	h	-	a	-	a	h	h	h	h	a	a	a	-	a	h	a	h	h	h	a	h	a	a	a	h	a	h	h	a	a	a
*scaffold25_580350	a	a	h	h	-	-	h	a	a	a	h	a	a	h	h	a	h	-	h	h	a	-	a	h	h	h	h	a	a	a	a	-	h	a	h	h	h	-	h	a	a	a	h	a	h	h	a	a	a
*scaffold25_580444	a	a	h	h	-	-	h	a	a	a	h	a	a	h	h	a	h	-	h	h	a	-	a	h	h	h	h	a	a	a	a	-	h	a	h	h	h	-	h	a	a	a	h	a	h	h	a	a	a
*scaffold25_621016	a	a	h	h	a	a	h	a	a	a	h	a	a	h	h	a	h	a	h	-	a	a	a	h	h	h	h	a	a	a	a	a	h	a	h	h	h	a	h	a	a	a	h	a	h	h	a	a	a
*scaffold25_786634	a	a	h	h	a	a	h	a	a	a	h	a	a	h	h	a	h	a	h	-	a	-	a	h	h	h	h	a	a	a	a	-	h	a	h	h	h	-	h	a	a	a	h	a	h	a	a	a	a
*scaffold250_160344	a	h	-	h	h	h	a	a	a	h	h	h	h	h	-	a	h	a	h	h	a	a	a	a	a	h	a	a	a	h	-	h	a	a	a	a	h	h	h	a	a	a	h	h	h	h	-	a	a
*scaffold250_275205C	a	h	a	h	h	h	a	a	a	h	h	h	h	h	a	h	h	a	h	-	a	a	a	a	a	h	a	a	a	h	a	h	a	a	a	a	h	h	h	a	a	a	h	h	h	h	a	a	a
*scaffold250_275264	a	h	a	h	h	h	a	a	a	h	h	h	h	h	a	h	h	a	h	h	a	-	a	a	a	h	a	a	a	h	a	h	a	a	a	a	h	h	h	a	a	a	h	h	h	h	a	a	a
*scaffold250_275279C	a	h	a	h	h	h	a	a	a	h	h	h	h	h	a	h	h	a	h	-	a	a	a	a	a	h	a	a	a	h	a	h	a	a	a	a	h	h	-	a	a	a	h	h	h	h	a	a	a
*scaffold250_275285	a	h	-	h	h	h	a	a	a	h	h	h	h	h	a	h	h	a	h	h	a	-	a	a	a	h	a	a	a	h	a	h	a	a	a	a	h	h	h	a	a	a	h	h	h	h	a	a	a
*scaffold253_189858C	h	h	a	h	h	h	h	a	a	h	h	a	a	a	a	h	h	a	a	a	a	h	h	h	a	a	h	a	h	a	h	a	a	a	a	a	a	h	a	h	a	a	a	a	a	a	a	a	h
*scaffold254_286856	h	a	a	-	h	a	a	a	a	h	a	a	a	h	a	a	h	a	h	h	h	a	h	h	a	a	a	h	a	a	h	h	h	a	a	h	h	a	h	a	a	h	a	a	a	a	a	h	a
*scaffold255_202294C	a	a	h	a	h	h	a	a	a	-	-	a	a	a	h	a	a	a	a	-	h	-	h	a	h	a	-	h	h	h	-	a	a	-	h	a	a	h	h	a	h	h	h	h	h	h	-	a	h
*scaffold255_375476C	a	a	h	a	h	h	a	a	a	h	h	a	a	a	a	a	a	a	a	-	h	h	h	a	h	a	h	h	h	h	-	a	a	h	h	a	a	h	h	a	h	h	h	h	h	h	h	a	h
*scaffold255_375495	a	a	h	-	h	h	a	a	a	h	h	a	a	a	a	a	a	a	-	h	h	h	h	a	h	a	h	h	h	h	h	a	a	h	h	a	a	h	h	a	h	h	h	h	h	h	h	a	h
*scaffold255_375496	a	a	h	-	h	h	a	a	a	h	h	a	a	a	a	a	a	a	-	h	h	h	h	a	h	a	h	h	h	h	h	a	a	h	h	a	a	h	h	a	h	h	h	h	h	h	h	a	h
*scaffold255_375618	a	a	h	-	h	h	a	a	a	h	h	a	a	a	a	a	a	a	-	h	h	h	h	a	h	a	h	h	h	h	h	a	a	h	h	a	a	h	h	a	h	h	h	h	h	h	h	a	h
*scaffold255_436171C	a	a	h	a	h	h	a	a	a	h	h	a	a	a	a	a	a	a	a	-	h	-	h	a	h	a	h	h	h	h	h	a	a	h	h	a	a	h	h	a	h	h	h	h	h	h	h	a	h
*scaffold256_119272	h	h	h	h	h	a	a	h	a	a	a	a	a	a	a	a	h	h	h	-	h	-	a	h	h	a	a	h	a	h	h	h	h	h	a	a	h	h	h	h	h	a	h	a	a	h	a	h	h
*scaffold256_171040	h	h	h	h	h	a	a	h	a	a	a	a	a	a	a	a	h	h	h	h	h	-	a	h	h	a	a	h	a	h	h	h	h	h	a	a	h	h	h	h	h	a	h	a	a	h	a	h	h
*scaffold256_253421C	h	h	h	h	h	a	a	h	a	a	a	a	a	a	a	a	h	h	h	a	h	a	a	h	h	a	a	h	a	h	h	h	h	h	a	a	h	h	h	h	h	a	h	a	a	h	a	h	h
*scaffold256_274494	h	h	h	h	h	a	a	h	a	a	a	a	a	a	a	a	h	h	h	-	h	-	a	h	h	a	a	h	a	h	h	h	h	h	a	a	h	h	h	h	h	a	h	a	a	h	a	h	h
*scaffold256_276377	h	h	h	h	h	a	a	h	a	-	a	a	a	a	a	a	h	h	h	h	h	-	a	h	h	a	-	h	a	h	h	h	h	h	a	-	h	h	h	h	h	-	h	a	a	h	a	h	h
*scaffold256_276607	h	h	h	h	h	a	a	h	a	-	a	a	a	a	a	a	h	h	h	h	h	-	a	h	h	a	a	h	a	h	h	h	h	h	a	-	h	h	h	-	h	-	h	a	a	h	a	h	h
*scaffold256_311788C	h	h	-	-	-	a	a	-	a	a	a	a	a	a	a	a	-	-	h	a	h	a	a	h	h	a	a	h	a	h	-	h	h	h	a	a	h	-	-	h	h	a	h	a	a	h	a	h	h
*scaffold256_311888	h	h	h	h	h	a	a	h	a	a	a	a	-	a	-	a	h	h	h	-	h	-	a	h	h	a	a	h	a	h	h	h	h	h	a	a	h	h	h	h	h	a	h	a	a	h	a	h	h
*scaffold256_443759C	h	h	h	-	-	a	a	h	a	a	a	a	a	a	a	a	h	h	h	a	h	a	a	h	h	a	a	h	a	h	-	h	h	h	a	a	h	-	-	h	h	a	h	a	a	h	a	h	h
*scaffold256_559680C	h	h	h	-	h	a	a	h	a	a	a	a	a	a	a	a	h	h	h	a	h	a	a	h	h	a	a	h	a	h	h	h	h	h	a	a	h	h	h	h	h	a	h	a	a	h	a	h	h
*scaffold256_559687C	h	h	h	h	h	a	a	h	a	a	a	a	a	a	a	a	h	h	h	a	h	a	a	h	h	a	a	h	a	h	h	h	h	h	a	a	h	h	h	h	h	a	h	a	a	h	a	h	h
*scaffold256_559728C	h	h	h	h	h	a	a	h	a	a	a	a	a	a	a	a	h	h	h	a	h	a	a	h	h	a	a	h	a	h	h	h	h	h	a	a	h	h	h	h	h	a	h	a	a	h	a	h	h
*scaffold256_559734	h	h	h	h	h	a	a	h	a	a	a	a	a	a	a	a	h	h	h	-	h	a	a	h	h	a	a	h	a	h	h	h	h	h	a	a	h	h	h	h	h	a	h	a	a	h	a	h	h
*scaffold256_585173	h	h	h	h	h	a	a	h	a	a	a	a	a	a	a	a	h	h	h	-	h	a	a	h	h	a	a	h	a	h	h	h	h	h	a	a	h	h	h	h	h	a	h	a	a	h	a	h	h
*scaffold256_62106C	h	h	h	-	-	a	a	h	a	a	a	a	a	a	a	a	h	h	h	a	h	a	a	h	h	a	a	h	a	h	h	h	h	h	a	a	h	h	h	h	h	a	h	a	a	h	a	h	h
*scaffold26_1025412C	h	h	h	-	-	a	a	h	a	a	a	a	a	h	a	a	h	a	a	a	h	a	a	h	h	a	a	h	a	-	-	h	h	a	a	a	a	-	-	h	h	a	h	a	a	h	a	a	h
*scaffold26_1069286	h	h	h	h	h	a	a	h	a	a	a	a	a	h	a	a	h	a	a	-	h	-	a	h	h	a	a	h	a	h	h	h	h	a	a	a	a	h	h	h	h	-	h	a	a	h	a	a	h
*scaffold26_1133003C	h	h	h	h	h	a	a	h	a	a	a	a	a	h	a	a	h	a	a	a	h	a	a	h	h	a	a	h	a	h	-	-	h	a	a	a	a	-	-	h	h	a	h	a	a	h	a	a	h
*scaffold26_1485212	h	h	h	h	h	a	a	-	a	a	a	a	-	h	-	a	h	-	a	-	h	-	a	h	h	a	a	h	a	h	h	h	h	a	a	a	a	h	h	h	h	a	h	a	a	h	a	a	h
*scaffold26_1538048C	h	h	h	-	h	a	a	h	a	a	a	a	a	h	a	a	h	a	a	a	h	a	a	h	h	a	a	h	a	h	h	h	h	a	a	a	a	h	h	h	h	a	h	a	h	h	a	a	h
*scaffold26_1605964C	h	h	h	-	h	a	a	h	a	a	a	a	a	h	a	a	h	a	a	a	h	a	a	h	h	a	a	h	a	h	-	-	h	a	a	a	a	-	h	h	h	a	h	a	h	h	a	a	h
*scaffold26_1767821	h	h	h	h	h	a	a	-	a	a	a	a	a	h	a	a	h	a	a	-	h	-	a	h	h	a	a	h	a	h	h	h	h	a	a	a	a	h	h	h	h	a	h	a	h	h	a	a	h
*scaffold26_1767905C	h	h	-	-	-	a	a	h	a	a	a	a	a	-	a	a	-	a	a	a	h	a	a	h	h	a	a	h	a	h	h	h	h	a	a	a	a	h	-	h	h	a	h	a	h	h	a	a	h
*scaffold26_1767922	h	h	h	h	h	a	a	h	a	a	a	a	a	h	a	a	h	a	a	-	h	-	a	h	h	a	a	h	a	h	h	h	h	a	a	a	a	h	h	h	h	a	h	a	h	h	a	a	h
*scaffold26_1985210C	h	h	h	-	h	a	a	a	a	a	a	a	a	h	a	a	h	a	a	a	h	a	a	h	h	a	a	h	a	-	-	h	h	a	a	a	a	h	h	h	h	a	h	a	h	h	a	a	h
*scaffold26_2119593	h	h	h	h	h	a	a	a	a	a	a	a	a	h	a	a	h	a	a	-	h	a	a	h	h	a	a	h	a	h	h	h	h	a	a	a	a	h	h	h	h	a	h	a	h	h	-	a	a
*scaffold26_2277800	h	h	h	h	h	a	a	a	a	a	a	a	a	h	a	a	h	-	a	-	h	-	a	h	a	a	a	-	a	h	h	h	h	a	a	a	a	h	h	h	h	a	h	a	h	h	a	a	a
*scaffold26_2282790C	h	h	h	-	h	a	a	a	a	a	a	a	a	-	a	a	h	a	a	a	h	a	a	h	a	a	a	h	a	-	-	h	h	a	a	a	a	h	h	h	h	a	h	a	h	h	a	a	a
*scaffold26_239424C	h	h	h	-	h	a	a	h	a	a	a	a	a	a	a	a	h	a	a	a	h	a	a	h	h	a	a	h	a	-	h	h	h	a	a	a	a	-	-	h	h	a	h	a	a	h	a	a	h
*scaffold26_303429C	h	h	h	-	h	a	a	h	a	a	a	a	a	a	a	a	h	a	a	a	h	a	a	h	h	a	a	h	a	h	-	a	h	a	a	a	a	-	h	h	h	a	h	a	a	h	a	a	h
*scaffold26_304670	h	h	h	h	h	a	a	h	a	-	a	a	a	a	-	a	h	a	a	-	h	-	a	h	h	a	a	h	a	h	h	h	h	a	a	a	a	h	h	h	h	a	h	a	a	h	a	a	h
*scaffold26_526134	h	h	h	h	h	a	a	h	a	a	a	a	a	h	a	a	h	a	a	-	h	-	a	h	h	a	a	h	a	h	h	h	h	a	a	a	a	h	h	h	h	a	h	a	a	h	a	a	h
*scaffold26_597047C	h	h	h	-	h	a	a	h	a	a	a	a	a	h	a	a	h	a	a	a	h	a	a	h	h	a	a	h	a	h	h	h	h	a	a	a	a	h	h	h	h	a	h	a	a	h	a	a	h
*scaffold26_662005	h	h	h	h	h	a	a	h	a	a	a	a	a	h	a	a	h	a	a	a	h	a	a	h	h	a	a	h	a	h	h	h	h	a	a	a	a	-	h	h	h	a	h	a	a	h	a	a	h
*scaffold26_728674C	-	h	h	h	h	-	-	h	a	a	a	a	a	h	a	a	h	a	a	a	h	a	a	h	h	a	a	h	a	h	-	-	h	a	a	a	a	h	h	h	h	a	h	a	a	h	a	a	h
*scaffold26_906159	h	h	h	h	h	a	a	h	a	a	a	a	a	h	a	a	h	a	-	-	h	a	a	h	h	a	-	h	a	h	h	h	h	a	a	a	a	h	h	h	h	a	h	a	a	h	a	a	h
*scaffold26_986130	h	h	h	h	h	a	a	h	a	-	a	a	a	h	-	a	h	-	a	-	h	-	a	h	h	a	a	h	-	h	h	h	h	a	a	a	a	h	h	h	h	a	h	a	a	h	a	a	h
*scaffold262_128311	a	h	a	h	a	a	h	a	h	h	h	a	a	a	a	h	a	h	h	h	h	a	h	h	h	h	a	h	a	h	h	a	h	a	a	h	h	a	a	h	h	h	h	a	h	h	a	a	h
*scaffold262_128342	a	h	a	h	a	a	h	a	h	a	h	a	a	a	a	h	a	h	h	h	h	a	a	h	h	h	a	h	a	h	h	a	h	a	a	h	h	a	a	h	h	h	h	a	h	h	a	a	h
*scaffold263_114230C	h	a	-	a	a	a	a	a	a	a	a	h	h	h	a	a	a	h	-	-	h	a	h	h	a	a	a	h	a	a	-	h	h	h	a	h	h	h	h	h	a	h	a	a	a	a	a	h	h
*scaffold263_114318	h	a	h	a	-	a	a	a	a	a	a	h	h	h	a	a	a	h	h	h	h	a	h	h	a	a	a	h	a	a	h	h	h	h	a	h	h	h	h	h	a	h	a	a	a	a	a	h	h
*scaffold264_355845C	h	a	h	a	a	a	a	a	a	a	a	h	h	h	a	a	a	a	h	-	h	a	h	h	a	a	a	h	a	a	-	h	h	h	a	h	h	-	h	h	a	-	a	a	a	a	a	h	a
*scaffold264_364950	h	a	h	-	a	a	a	a	a	a	a	h	h	h	a	a	a	a	h	h	h	-	h	h	a	a	a	h	a	a	h	h	h	h	a	h	h	h	h	h	a	h	a	a	a	a	a	h	a
*scaffold264_444786	h	a	h	-	-	a	a	a	a	a	a	h	h	h	-	a	a	a	h	-	h	-	h	h	a	a	a	h	a	a	h	h	h	h	a	h	h	h	h	h	a	h	a	a	a	a	a	h	a
*scaffold264_518182	h	a	h	-	a	a	a	a	a	a	a	h	h	h	-	a	a	a	h	h	h	-	h	h	a	a	a	h	a	a	h	h	h	h	a	h	h	h	h	h	a	h	a	a	a	a	a	h	a
*scaffold264_546270	h	a	h	-	a	a	a	a	a	a	a	h	h	h	a	a	-	a	h	h	h	-	h	h	a	a	-	h	a	a	h	h	h	h	a	h	h	h	h	h	-	h	a	a	a	a	a	h	a
*scaffold264_608599C	h	a	h	a	a	a	-	a	a	a	a	h	h	h	a	a	-	a	h	h	h	a	h	h	a	a	a	h	-	a	h	h	h	h	a	h	h	h	h	h	a	h	a	a	a	a	a	h	a
*scaffold267_122418C	h	h	h	a	-	a	a	a	a	-	h	h	-	h	a	a	a	a	a	-	h	-	h	a	h	a	h	h	h	h	h	a	h	h	h	a	a	a	h	a	h	h	h	h	a	h	h	a	h
*scaffold267_124802C	h	h	h	a	-	a	a	a	a	h	h	h	-	h	a	a	a	a	a	-	h	-	h	a	h	a	h	h	h	h	h	a	h	h	h	a	a	a	h	a	h	h	h	h	a	h	h	a	h
*scaffold267_444427	h	h	h	-	h	a	a	a	a	h	h	h	h	-	a	a	a	-	a	h	h	h	h	a	h	a	h	h	h	h	h	a	h	h	h	a	a	a	h	-	h	h	h	h	h	h	h	-	h
*scaffold267_467794C	h	h	-	a	-	a	a	a	a	h	h	h	-	a	a	a	a	a	a	-	h	h	h	a	h	a	h	h	h	h	h	a	h	h	h	a	a	a	h	a	h	h	h	h	h	h	h	a	h
*scaffold267_49390C	h	h	-	a	-	a	a	a	a	h	h	h	h	h	a	a	a	a	a	-	h	h	h	a	h	a	h	h	h	h	h	a	h	h	h	a	a	a	h	a	h	h	h	h	a	h	h	a	h
*scaffold268_113573	h	a	-	h	a	h	a	h	a	h	h	a	-	a	a	a	h	h	h	-	a	a	h	a	a	h	h	a	h	a	a	a	a	a	h	a	h	a	a	h	a	h	h	h	a	a	-	h	a
*scaffold268_12246	h	a	a	-	a	h	a	h	a	h	h	a	a	a	a	a	h	h	h	a	a	a	h	h	a	h	h	a	h	a	a	a	a	a	h	a	h	-	a	h	a	h	h	h	a	a	h	h	a
*scaffold268_12247	h	a	a	-	a	h	a	h	a	h	h	a	a	a	a	a	h	h	h	a	a	a	h	h	a	h	h	a	h	a	a	a	a	a	h	a	h	-	a	h	a	h	h	h	a	a	h	h	a
*scaffold268_12248	h	a	a	-	a	h	a	h	a	h	h	a	a	a	a	a	h	h	h	a	a	a	h	h	h	h	h	h	h	h	h	h	h	h	h	h	h	-	h	h	h	h	h	h	a	a	h	h	a
*scaffold268_302191C	h	a	a	-	a	h	a	h	a	h	-	a	a	a	a	a	h	-	h	a	a	a	h	h	a	h	h	a	h	a	a	a	a	a	h	a	h	a	a	h	a	h	h	h	a	a	h	h	a
*scaffold268_302205C	h	a	a	-	a	h	a	h	a	h	-	a	a	a	a	a	h	-	h	a	a	a	h	h	a	h	h	a	h	a	a	a	a	a	h	a	h	a	a	h	a	h	h	h	a	a	h	h	a
*scaffold268_560694	h	a	a	h	a	h	a	h	a	h	h	a	a	a	a	a	h	h	h	-	a	a	h	h	a	h	h	a	h	a	a	a	a	a	h	a	h	-	a	h	a	h	h	h	a	a	h	h	a
*scaffold268_560702	h	a	a	h	a	h	a	h	a	h	h	a	a	a	-	a	h	h	h	-	a	-	h	h	a	h	h	a	h	-	-	a	a	a	h	a	h	-	-	h	a	h	h	h	a	a	h	h	a
*scaffold27_1095750C	h	a	a	-	a	h	a	-	a	h	h	a	a	a	a	a	-	-	h	a	a	a	h	h	a	h	h	a	h	a	a	a	a	a	-	a	h	a	a	h	a	h	h	h	a	a	-	h	a
*scaffold27_1257512C	h	a	a	-	a	h	a	h	a	h	h	a	a	a	a	a	-	-	h	a	a	a	h	h	a	h	h	a	h	a	a	a	a	a	h	a	h	a	a	h	a	h	h	h	a	a	h	h	a
*scaffold27_274821C	h	a	a	-	-	h	a	h	-	h	h	a	-	a	a	-	h	h	h	a	a	a	h	h	a	h	h	a	h	-	a	a	a	a	h	a	h	a	a	h	a	h	h	h	a	a	h	h	a
*scaffold27_274823	h	a	a	h	a	h	a	h	a	h	h	a	a	a	a	a	h	h	h	a	a	-	h	h	a	h	h	a	h	a	a	a	a	a	h	a	h	a	a	h	a	h	h	h	a	a	h	h	a
*scaffold27_367420C	h	a	a	h	a	h	a	h	a	h	h	a	a	a	a	a	h	h	h	a	a	a	h	h	a	h	h	a	h	a	a	a	a	a	h	a	h	a	a	h	a	h	h	h	a	a	h	h	a
*scaffold270_334757C	h	h	a	-	a	h	h	a	a	h	h	a	a	a	a	h	h	a	a	a	a	-	h	h	a	h	h	a	h	a	h	a	a	h	a	a	a	a	h	h	a	a	h	a	a	a	a	a	h
*scaffold270_351956C	h	h	a	h	a	h	h	a	a	-	h	a	a	a	a	h	h	a	a	a	a	-	h	h	a	h	h	a	h	a	-	a	a	h	a	a	a	a	-	h	a	a	h	a	a	a	a	a	h
*scaffold271_195047C	a	h	a	-	h	h	-	a	a	-	a	h	h	h	a	h	-	a	h	-	h	a	a	a	a	h	a	a	a	h	a	h	a	a	a	a	h	h	h	a	a	a	h	h	h	h	-	a	a
*scaffold271_71931	a	h	a	a	a	a	a	a	h	h	h	a	a	a	a	a	a	a	a	h	a	-	a	h	a	h	a	h	h	a	a	-	a	a	h	h	-	h	h	a	h	a	a	a	h	a	h	h	a
*scaffold274_104421	h	a	a	h	a	h	a	a	h	a	a	h	h	a	a	h	h	a	h	-	a	a	-	h	h	a	h	h	h	a	h	h	h	a	a	a	h	a	h	a	h	h	h	a	h	a	h	h	a
*scaffold274_104443	h	a	a	h	a	h	a	a	h	a	a	h	h	a	a	h	h	a	h	-	a	a	-	h	h	a	h	h	h	a	h	h	h	a	a	a	h	a	h	a	h	h	h	a	h	a	h	h	a
*scaffold274_112657C	h	a	a	-	a	h	a	a	h	a	a	h	-	a	a	h	h	a	h	a	a	a	a	h	h	a	h	h	h	a	-	h	h	a	a	a	h	a	h	a	h	h	h	a	h	a	h	h	a
*scaffold274_112727C	h	a	a	-	a	h	a	a	h	a	a	h	-	a	-	h	h	a	h	a	a	a	a	h	h	a	h	h	h	a	-	h	h	a	a	a	h	a	h	a	h	h	h	a	h	a	h	h	a
*scaffold274_209835C	h	a	a	-	a	h	a	a	h	a	a	h	-	a	a	h	-	a	h	a	a	a	a	h	h	a	h	h	h	a	h	h	h	a	a	a	h	a	-	a	h	-	h	a	h	a	h	h	a
*scaffold274_209841C	h	a	-	a	-	a	a	a	a	h	a	a	a	h	a	a	-	a	h	-	h	a	h	h	a	a	a	h	a	a	h	h	h	a	a	h	h	a	-	a	a	h	a	a	a	a	a	h	a
*scaffold274_209870C	h	a	-	a	-	a	a	a	a	h	a	a	a	h	a	a	-	a	h	-	h	a	h	h	a	a	a	h	a	a	h	h	h	a	a	h	h	a	-	a	a	h	a	-	a	a	a	h	a
*scaffold274_87578C	h	a	a	-	a	h	a	a	h	a	a	h	-	a	a	h	-	a	h	a	a	a	a	h	h	a	-	h	h	a	-	-	-	a	a	a	h	a	-	a	h	h	h	a	h	a	h	h	a
*scaffold275_139511	a	a	-	h	a	a	a	h	a	a	h	h	h	h	a	a	h	a	h	h	a	h	a	h	h	h	a	h	a	a	-	h	a	h	h	h	h	a	h	a	a	a	h	a	h	a	a	a	h
*scaffold275_159035	-	a	a	h	a	a	a	h	a	a	h	h	h	h	a	a	h	a	h	h	a	h	a	h	h	h	a	h	a	a	-	h	-	h	h	h	h	-	h	a	a	-	h	a	h	a	-	a	h
*scaffold275_193668	a	a	a	h	a	a	a	h	a	a	h	h	h	h	a	a	h	a	h	h	a	h	a	h	h	h	a	h	a	a	a	h	a	h	h	h	h	-	h	a	a	a	h	a	h	a	a	a	h
*scaffold275_193692	a	a	a	h	a	a	a	h	a	a	h	h	h	h	a	a	h	a	h	h	a	h	a	h	h	h	a	h	a	a	a	h	a	h	h	h	h	-	h	a	a	a	h	a	h	a	a	a	h
*scaffold275_281020	a	a	a	h	a	a	a	h	a	a	-	h	h	h	a	a	h	a	h	h	a	h	a	h	h	h	a	h	a	a	-	h	a	h	h	h	h	a	h	a	a	a	h	a	h	a	a	a	h
*scaffold275_31787C	a	a	a	-	a	a	a	h	a	a	h	h	h	h	a	a	h	a	h	-	a	h	a	h	-	h	a	h	a	a	a	h	a	h	h	-	h	a	-	a	a	a	h	a	h	a	a	a	h
*scaffold275_43668	a	a	a	h	a	a	a	h	a	a	h	h	h	h	a	a	h	a	h	-	a	h	a	-	h	-	a	h	a	a	a	-	a	-	h	h	h	a	h	a	a	a	h	a	h	a	a	a	h
*scaffold275_43702	a	a	-	h	a	a	a	h	a	a	h	h	h	h	a	a	h	a	h	-	a	h	a	-	h	a	-	h	a	a	a	-	a	-	h	h	h	a	h	a	a	a	h	a	h	a	a	a	h
*scaffold275_43839	a	a	a	h	a	a	a	h	a	a	h	h	h	h	a	a	h	a	-	h	a	h	a	h	h	h	a	-	a	a	-	h	a	h	h	h	h	a	h	a	a	a	h	a	h	a	a	a	h
*scaffold275_89274	a	a	a	h	a	a	a	h	a	a	h	h	h	h	a	a	h	a	h	h	a	h	a	h	h	h	a	h	a	-	-	h	a	h	h	h	h	-	h	-	a	-	h	a	h	a	a	a	h
*scaffold276_143519C	a	h	a	a	-	a	h	a	a	-	a	a	a	a	a	a	a	a	h	a	a	-	h	a	a	h	h	h	a	h	a	a	h	h	a	h	h	a	a	h	h	a	h	a	a	h	h	h	a
*scaffold276_201916	a	a	a	-	h	a	h	a	a	h	a	a	a	a	-	a	a	a	h	-	a	h	h	a	a	h	h	h	a	h	a	-	h	h	-	h	h	-	a	h	h	a	h	a	a	h	h	h	a
*scaffold276_209584	a	a	a	a	h	a	h	a	a	h	a	a	a	a	a	a	a	a	a	a	a	h	h	a	a	h	h	h	a	h	a	a	h	h	a	h	a	a	a	h	h	a	h	a	a	h	h	h	a
*scaffold278_158519	a	a	-	-	a	a	h	-	a	a	a	a	-	a	h	a	a	-	a	-	a	-	h	h	a	a	h	h	a	h	a	a	a	a	a	h	a	h	-	h	a	a	a	a	h	h	h	a	a
*scaffold279_426338C	a	h	a	a	h	a	h	h	a	h	a	h	h	a	-	h	a	h	a	a	a	-	a	h	a	h	h	a	a	h	-	h	a	a	h	h	a	h	a	h	a	a	h	h	a	h	h	a	a
*scaffold279_793355C	a	h	a	a	h	h	a	h	a	a	h	a	a	h	a	a	h	h	a	a	a	-	h	h	h	a	a	a	a	h	h	a	h	a	h	h	a	a	a	h	h	a	a	h	h	h	a	a	a
*scaffold279_793449C	a	h	a	a	h	h	-	h	a	a	h	a	a	h	a	a	h	h	a	a	a	-	h	h	h	a	a	a	a	h	h	a	h	a	h	h	a	a	a	h	h	a	a	h	h	h	a	a	a
*scaffold279_93726C	a	h	a	a	h	h	a	h	a	a	h	a	a	h	a	a	h	-	a	-	a	h	h	h	h	a	a	a	-	h	h	a	h	a	h	h	a	a	a	h	h	a	a	h	h	h	a	a	a
*scaffold279_93732C	a	h	a	a	h	h	a	h	a	a	h	a	a	h	a	a	-	-	a	-	a	-	h	h	h	a	a	a	-	h	h	a	h	a	h	h	a	a	a	h	-	a	a	h	h	h	a	a	a
*scaffold28_1122104	a	h	h	h	h	h	a	a	a	h	a	h	h	h	a	h	h	a	a	h	h	a	a	a	a	h	a	a	a	h	a	h	a	a	a	a	a	h	h	a	h	-	h	h	h	h	a	a	a
*scaffold28_1786456C	h	h	h	h	h	h	a	a	a	h	a	h	h	h	a	h	h	a	a	h	h	a	a	a	a	h	a	a	a	h	a	h	a	a	a	a	a	h	h	a	h	a	h	h	h	h	a	a	a
*scaffold28_1843914C	h	h	-	-	-	h	a	a	a	h	a	h	-	h	a	h	-	a	a	-	h	a	a	a	a	h	a	a	a	h	a	h	a	a	a	a	a	h	h	a	h	a	h	h	h	h	a	a	a
*scaffold28_396098	a	h	h	h	h	h	a	a	a	h	a	h	h	h	a	h	h	-	a	h	h	a	a	a	a	h	a	a	a	h	a	h	a	a	a	a	a	h	h	a	h	a	h	h	h	h	a	a	a
*scaffold281_408797	h	h	a	h	a	h	h	a	a	h	h	a	a	a	a	h	h	a	a	-	a	h	h	h	a	a	h	a	h	a	h	a	a	h	a	a	a	h	a	h	a	a	a	a	a	a	a	a	h
*scaffold281_408961C	h	h	a	h	a	h	h	a	a	h	h	-	-	a	a	h	h	a	a	a	a	h	h	h	a	a	h	a	h	a	h	a	a	h	a	a	-	-	a	h	a	a	a	a	a	-	a	a	h
*scaffold282_269347	a	h	a	h	a	a	a	a	h	h	h	a	a	-	h	a	a	a	h	-	h	h	a	h	a	a	a	h	h	a	a	a	a	a	h	a	h	h	a	a	h	a	h	h	-	h	h	h	h
*scaffold283_320572	a	a	a	h	a	a	a	a	h	h	a	h	h	a	a	a	h	a	-	h	a	h	a	h	h	a	a	a	h	h	-	a	h	-	a	a	a	h	h	a	a	a	a	a	a	a	-	h	h
*scaffold283_320596C	a	a	a	-	a	a	a	a	h	h	a	h	h	a	a	a	h	a	a	h	a	h	a	h	h	a	a	a	h	h	a	a	h	a	a	a	a	-	h	a	a	a	a	a	a	a	a	h	h
*scaffold285_297982C	h	a	h	a	a	a	a	a	h	h	a	a	a	a	h	a	a	a	h	-	a	a	a	a	a	a	a	h	h	h	h	h	a	h	h	h	h	a	h	a	a	-	a	-	h	h	a	h	h
*scaffold285_297988C	h	a	h	a	a	a	a	a	h	h	a	a	a	a	h	a	a	a	h	-	a	a	a	a	a	a	a	h	h	h	h	h	a	h	h	h	h	a	h	a	a	-	a	-	h	h	a	h	h
*scaffold285_298012C	h	a	h	a	a	a	a	a	h	-	a	a	a	a	h	a	a	a	h	-	a	a	a	a	a	a	a	h	h	h	h	h	a	h	h	h	h	a	h	a	a	-	a	-	h	h	a	h	h
*scaffold286_240044	a	h	h	h	h	a	h	a	a	-	h	a	a	h	h	a	a	a	h	-	h	h	h	a	a	a	h	h	a	a	-	a	-	a	h	a	h	h	a	a	h	-	h	h	a	a	h	h	h
*scaffold287_231521	h	h	h	h	h	a	a	h	a	a	a	a	a	a	a	a	h	h	h	-	h	a	a	h	h	a	a	h	a	h	h	h	h	h	a	a	h	h	h	h	h	a	h	a	a	h	a	a	h
*scaffold287_231532	h	h	h	h	h	a	a	h	a	a	a	a	a	a	a	a	h	h	h	-	h	a	a	h	h	a	a	h	a	h	h	h	h	h	a	a	h	h	h	h	h	a	h	a	a	h	a	a	h
*scaffold287_231541	h	h	h	h	h	a	a	h	a	a	a	a	a	a	a	a	h	h	h	-	h	a	a	h	h	a	a	h	a	h	h	h	h	h	a	a	h	h	h	h	h	a	h	a	a	h	a	a	h
*scaffold287_231629C	h	h	h	h	h	a	a	h	a	a	a	a	a	a	a	a	h	h	h	a	h	a	a	h	h	a	a	h	a	h	-	-	h	h	a	a	h	h	h	h	h	a	h	a	a	h	a	a	h
*scaffold287_302942	h	h	h	h	h	a	a	h	a	-	a	a	a	-	a	a	h	h	h	-	h	a	-	h	h	a	a	h	a	h	h	h	h	h	-	a	h	h	h	h	h	-	h	a	a	h	a	a	h
*scaffold287_302960C	-	h	h	h	h	a	a	h	a	a	a	a	a	a	a	a	h	h	h	a	h	a	a	h	-	a	a	h	a	h	h	a	h	h	a	a	h	-	h	-	h	a	h	a	a	h	a	a	h
*scaffold287_342615	h	h	h	h	h	a	a	h	a	a	a	a	a	a	a	a	h	h	h	a	h	a	a	h	h	a	a	h	a	h	h	h	h	h	a	a	h	h	h	h	h	a	h	a	a	h	a	a	h
*scaffold287_342633	h	h	h	h	h	a	a	h	a	-	a	a	a	a	a	a	h	h	h	a	h	a	-	h	h	a	a	h	a	h	h	h	h	h	a	a	h	h	h	h	h	-	h	a	a	h	a	a	h
*scaffold287_377447	h	h	h	h	h	a	a	h	a	a	-	a	-	-	a	a	h	h	h	-	h	-	a	h	h	a	a	h	a	h	h	h	h	h	a	a	h	h	h	h	h	a	h	a	a	h	a	a	h
*scaffold287_377513	h	h	h	h	h	a	a	h	a	a	-	a	-	-	-	a	h	h	h	-	h	-	a	h	h	a	a	h	a	h	h	h	h	h	a	a	h	h	h	h	h	a	h	a	a	h	a	a	h
*scaffold287_381811	h	h	h	h	h	a	a	h	a	a	a	a	-	-	-	a	h	h	h	-	h	-	a	h	h	a	a	h	a	h	h	h	h	h	a	a	h	h	h	h	h	a	h	a	a	h	a	a	h
*scaffold287_416589	h	h	h	h	h	a	a	h	a	a	-	a	-	-	-	a	h	h	h	h	h	-	a	h	h	a	a	h	a	h	h	h	h	h	a	a	h	h	h	h	h	a	h	a	a	h	a	a	h
*scaffold287_417570C	h	h	h	-	h	a	a	h	a	a	a	a	a	a	a	a	h	h	h	a	h	a	a	h	-	a	a	h	a	-	-	h	h	h	a	a	h	-	-	h	h	a	h	a	a	h	a	a	h
*scaffold287_454840	h	h	h	h	h	a	a	h	a	a	a	a	a	a	-	a	h	h	h	-	h	-	a	h	h	a	a	h	a	h	h	-	h	h	a	a	h	h	h	h	h	a	-	a	a	h	a	a	h
*scaffold287_478475	h	h	-	h	-	a	a	h	a	a	a	-	a	a	a	a	a	h	h	-	h	-	a	h	h	a	a	h	a	h	h	h	h	h	a	a	h	h	h	h	h	a	h	a	a	h	a	a	h
*scaffold287_490077	h	h	h	h	h	a	a	h	a	a	a	a	a	a	a	a	h	h	h	-	h	a	a	h	h	a	a	h	a	h	h	h	h	h	a	-	h	h	h	h	h	a	h	a	a	h	a	a	h
*scaffold287_54655C	h	h	-	-	-	a	a	h	a	a	a	a	a	a	a	a	-	h	h	a	h	-	a	h	h	a	a	h	a	h	h	h	h	h	a	a	h	h	-	h	h	a	h	a	a	h	a	h	h
*scaffold288_256060C	a	a	h	-	a	a	h	a	a	a	h	a	a	h	h	h	h	a	h	a	a	a	a	h	h	h	h	a	a	a	a	a	h	a	h	h	h	a	h	a	a	a	h	-	h	h	a	a	a
*scaffold289_190397	a	h	a	h	h	h	-	a	-	h	-	h	h	h	-	h	h	-	h	h	h	-	a	a	a	h	a	a	a	h	a	h	a	a	a	a	h	h	h	a	h	a	h	h	h	h	a	a	a
*scaffold289_7457C	a	h	a	-	-	h	a	a	a	h	a	h	h	h	a	h	h	a	h	-	h	a	a	a	a	h	a	a	a	h	a	h	a	a	a	a	h	-	h	a	h	a	h	h	h	h	a	a	a
*scaffold29_1032471C	a	a	a	-	a	a	a	h	a	a	h	h	h	h	a	a	h	a	h	a	a	-	a	h	h	h	a	h	h	a	a	h	a	h	h	h	h	a	h	a	a	a	h	a	h	a	a	a	h
*scaffold29_1343740C	a	a	a	-	a	a	a	h	a	a	h	h	h	h	a	a	h	a	h	-	a	-	a	h	-	h	a	h	a	a	a	h	a	h	h	h	h	a	h	a	a	a	h	a	h	a	a	a	h
*scaffold29_1343774C	a	a	a	-	a	a	a	h	a	a	h	h	h	h	a	a	h	a	h	-	a	-	a	h	h	h	a	h	a	a	a	h	a	h	h	h	h	a	h	a	a	a	h	a	h	a	a	a	h
*scaffold29_1391248	a	a	a	h	a	a	a	h	a	a	h	h	h	h	a	a	h	a	h	h	a	h	a	h	h	h	a	h	a	a	a	h	a	h	h	h	h	a	h	a	a	a	h	a	h	a	a	a	h
*scaffold29_1594032C	a	a	a	-	-	a	a	h	a	a	h	h	h	h	a	a	h	a	h	-	a	-	a	h	h	h	a	h	a	a	a	h	a	h	h	h	h	a	h	a	a	a	h	a	h	a	a	a	h
*scaffold29_1594146	a	a	a	h	-	a	a	h	a	a	h	h	h	h	-	a	h	a	h	h	a	h	a	-	h	h	a	h	a	a	a	h	a	h	h	h	h	a	h	a	a	a	h	a	h	a	a	a	h
*scaffold29_1638846C	a	a	a	h	a	a	a	h	a	-	h	h	h	h	a	a	h	a	h	a	a	-	a	h	h	h	a	h	a	-	a	h	a	h	h	h	h	a	h	a	a	a	h	-	h	-	-	a	h
*scaffold29_1657378	a	a	a	h	a	a	a	h	a	a	h	h	h	h	-	a	h	a	h	h	a	h	-	h	h	h	a	h	a	a	-	h	a	h	h	h	h	-	h	a	a	a	h	a	h	a	a	a	h
*scaffold29_1965413	a	a	a	h	a	a	a	h	a	a	h	h	h	h	a	a	h	a	h	h	a	h	a	h	h	h	a	h	a	a	a	h	a	h	h	h	h	-	h	a	a	a	h	a	h	a	a	a	h
*scaffold29_485424C	a	a	a	h	a	a	a	h	a	a	h	h	h	h	a	a	h	a	h	h	a	h	a	h	a	h	a	h	h	a	a	h	a	h	h	h	h	a	-	a	a	a	h	a	h	a	a	a	h
*scaffold29_485437	a	a	a	h	a	a	a	h	a	-	h	h	h	h	a	a	h	a	h	h	a	h	a	h	a	h	a	h	h	a	a	h	a	h	h	h	h	-	h	a	-	a	h	a	h	a	a	a	h
*scaffold29_545217C	a	a	a	-	a	a	a	h	a	a	h	h	h	h	a	a	h	a	-	-	a	-	a	h	a	h	a	h	h	a	a	-	a	h	-	-	h	a	h	a	a	a	h	a	h	a	a	a	h
*scaffold29_545224	a	a	a	h	a	a	a	h	a	-	h	h	h	h	a	a	h	a	h	h	a	h	a	h	a	h	a	h	h	a	-	h	a	h	h	h	h	-	h	a	a	a	h	a	h	a	a	a	h
*scaffold29_545226C	a	a	a	-	a	a	a	h	a	a	h	h	h	h	a	a	h	a	-	-	a	-	a	h	a	h	a	h	h	a	a	-	a	h	-	-	h	a	h	a	a	a	h	a	h	a	a	a	h
*scaffold29_650104C	a	a	a	-	a	a	a	h	a	a	h	-	h	-	a	a	-	a	h	-	a	-	a	h	a	h	a	h	h	a	a	h	a	h	h	h	h	a	-	a	a	a	h	a	h	a	a	a	h
*scaffold29_650112	a	a	-	h	a	a	a	h	a	-	h	h	h	h	a	a	h	a	h	h	a	h	a	h	a	h	a	h	h	a	a	h	a	h	h	h	h	-	h	a	a	a	h	a	h	a	a	a	h
*scaffold29_669715	a	a	a	h	a	a	a	h	a	a	h	h	h	h	a	a	h	-	h	h	a	h	a	h	h	h	a	h	h	a	-	h	a	h	h	h	h	-	h	a	a	a	h	a	h	a	a	a	h
*scaffold29_669775	a	a	a	h	a	a	a	h	a	a	h	h	h	h	a	a	h	-	h	h	a	h	a	h	h	h	a	h	h	a	-	h	a	h	h	h	h	-	h	a	a	a	h	a	h	a	a	a	h
*scaffold29_771893C	a	a	a	h	a	a	a	h	a	a	h	h	h	h	a	a	h	a	h	-	a	-	a	h	h	h	a	h	h	a	a	h	a	h	h	h	h	a	h	a	a	a	h	a	h	a	a	a	h
*scaffold29_803456C	a	a	a	-	a	a	a	h	a	a	h	h	h	h	a	a	-	a	h	-	a	-	a	h	h	h	a	h	h	a	a	-	a	h	h	h	h	a	h	a	a	a	h	a	h	a	a	a	h
*scaffold29_905583	a	a	a	h	a	a	a	h	a	-	h	h	h	h	a	a	h	a	h	h	a	h	a	h	h	h	a	h	h	a	a	h	a	h	h	h	h	a	h	a	a	a	h	a	h	a	-	a	h
*scaffold29_938427C	a	a	a	-	a	a	a	h	a	-	h	h	h	h	a	a	h	a	h	-	a	h	a	h	h	h	a	h	h	a	a	h	a	h	h	h	h	a	h	a	a	a	h	a	h	a	a	a	h
*scaffold29_988650	a	a	-	h	-	a	a	h	a	a	h	h	h	h	a	a	h	a	h	h	a	h	a	h	h	h	a	h	h	a	-	h	a	h	h	h	h	a	h	a	a	a	h	a	h	a	a	a	h
*scaffold290_123646	h	a	h	-	a	a	a	a	h	h	a	a	a	a	h	a	a	-	h	h	h	a	a	a	a	a	h	h	h	h	h	h	a	h	h	h	h	a	h	a	a	h	h	h	h	h	a	h	h
*scaffold291_320616C	a	h	h	a	a	h	h	h	-	a	h	a	-	a	h	a	h	h	a	h	h	h	h	h	h	h	h	a	h	a	a	h	h	-	a	h	a	a	h	a	a	a	a	h	h	h	a	a	a
*scaffold291_323392	-	h	-	-	a	a	h	a	h	a	h	a	-	-	-	h	a	h	h	h	h	h	a	h	h	h	h	h	a	h	h	-	h	a	a	h	h	-	-	a	h	h	h	h	h	h	a	a	h
*scaffold291_373033	a	h	a	a	a	a	h	a	h	a	h	a	a	a	a	h	a	h	h	h	h	a	a	h	h	h	a	h	a	h	h	a	h	a	a	h	h	a	a	h	h	h	h	h	h	h	a	a	h
*scaffold291_373037	a	h	a	a	a	a	h	a	h	a	h	a	a	a	a	h	a	h	h	h	h	a	a	h	h	h	a	h	a	h	h	a	h	a	a	h	h	a	a	h	h	h	h	h	h	h	a	a	h
*scaffold291_373056C	a	h	a	a	a	a	h	a	h	a	h	a	a	a	a	h	a	h	h	h	h	a	a	h	h	h	a	h	a	h	h	a	h	a	a	h	h	a	a	h	h	h	h	h	h	h	a	a	h
*scaffold291_414013	a	h	-	-	-	a	h	a	h	a	h	a	a	a	-	h	-	h	h	h	h	a	a	h	h	h	a	h	a	h	h	a	h	a	a	h	h	-	a	h	h	h	h	h	h	h	a	a	h
*scaffold295_111364	a	a	h	-	h	a	h	a	h	h	-	h	h	a	h	a	-	-	a	-	h	-	h	a	a	a	h	h	h	h	h	h	h	h	h	a	a	a	h	a	a	a	h	h	a	a	a	a	h
*scaffold295_287049C	a	a	-	a	-	a	h	a	h	h	a	h	h	a	h	a	a	a	a	a	h	a	-	a	a	a	-	h	h	h	-	h	h	h	h	a	a	a	-	a	a	a	h	h	a	a	a	a	h
*scaffold295_316714	a	a	h	-	h	a	h	a	h	h	-	h	h	a	h	a	-	a	a	-	h	-	h	a	a	a	h	h	h	h	h	h	h	h	h	a	a	-	h	a	a	a	h	h	a	a	a	a	h
*scaffold295_381732	a	a	h	a	h	a	h	a	h	h	a	h	h	a	h	a	a	a	a	a	h	a	h	a	a	a	h	h	h	h	h	h	h	h	h	a	a	a	h	a	a	a	h	h	a	a	a	a	h
*scaffold295_403706C	a	a	h	a	-	a	h	a	h	h	a	h	h	a	h	a	a	a	a	a	h	a	h	a	a	a	h	h	h	h	h	h	h	h	-	a	a	a	-	a	a	a	h	h	a	a	a	a	h
*scaffold295_406136C	a	a	h	a	-	a	h	a	h	h	a	h	h	a	-	a	a	a	a	a	h	a	h	a	a	a	h	h	h	h	-	h	h	h	h	a	a	a	h	a	a	a	h	h	a	a	a	a	h
*scaffold295_461381C	a	a	h	a	h	a	h	a	h	-	a	h	h	a	h	a	a	a	a	a	h	a	-	a	a	a	-	h	-	-	-	-	h	h	-	a	a	a	-	a	a	a	h	h	a	a	a	a	h
*scaffold295_521405C	a	a	h	a	h	a	h	a	h	-	a	h	h	a	h	a	a	a	a	a	h	a	h	a	a	a	h	h	-	h	h	-	h	h	-	a	a	a	-	a	a	a	h	h	a	a	a	a	h
*scaffold296_63110C	h	h	a	a	a	a	h	a	h	h	a	-	a	h	h	h	h	a	h	a	a	-	a	a	a	a	a	a	h	h	-	a	h	h	h	-	h	h	-	h	h	-	a	h	a	a	h	-	h
*scaffold297_220891C	a	h	h	-	h	h	h	h	a	a	a	a	a	h	-	a	h	a	a	a	h	-	h	a	a	a	h	h	a	h	a	a	a	a	h	a	a	-	a	h	a	a	h	h	a	a	h	h	a
*scaffold297_220915C	a	h	h	-	-	h	h	h	a	a	a	a	a	h	-	a	h	a	a	a	h	-	h	a	a	a	h	h	a	h	a	a	a	a	h	a	a	-	a	h	a	a	h	h	a	a	h	h	a
*scaffold298_351626C	h	h	a	a	a	a	h	h	h	a	a	a	a	h	h	h	h	h	h	h	h	a	h	a	h	a	h	h	h	a	h	a	a	h	a	a	h	a	h	h	a	a	a	h	h	a	h	h	a
*scaffold298_351631C	h	h	a	a	a	a	h	h	h	a	a	a	a	h	h	h	h	h	h	h	h	a	h	a	h	a	-	h	h	a	h	a	a	h	a	a	h	a	h	h	a	a	a	h	h	a	h	h	a
*scaffold298_351737C	h	h	a	a	a	a	h	h	h	a	a	a	a	h	h	h	h	h	h	h	h	a	h	-	h	a	h	h	h	a	h	a	a	h	a	a	h	a	h	h	a	a	a	h	h	a	h	h	a
*scaffold299_423133C	a	h	-	-	-	a	a	a	a	h	a	h	h	a	-	h	h	h	a	a	h	-	a	-	h	h	h	a	a	a	h	a	a	a	a	a	a	a	-	h	a	a	a	h	a	h	h	h	a
*scaffold299_436768	a	h	h	h	h	a	a	a	a	h	a	h	h	-	h	h	h	h	a	-	h	h	a	a	h	h	h	a	a	-	h	a	a	a	a	a	a	a	h	h	a	a	a	h	a	h	h	h	a
*scaffold299_436864C	a	h	-	-	h	a	a	a	a	h	a	h	h	a	h	h	h	h	a	a	h	-	a	a	h	h	h	a	a	a	h	a	a	a	a	a	a	a	h	h	a	a	a	h	a	h	h	h	a
*scaffold3_1033506C	a	a	a	h	a	a	a	a	h	a	a	h	-	h	a	a	h	a	a	-	a	-	a	h	a	a	a	h	h	h	a	h	-	h	a	a	a	-	h	a	a	a	h	a	h	a	a	h	h
*scaffold3_113844	h	a	h	-	-	-	a	-	a	a	-	h	h	h	-	a	-	-	h	h	h	-	h	h	a	a	a	h	a	a	h	h	h	h	a	h	h	h	h	h	a	h	a	a	a	a	a	h	h
*scaffold3_1166899	a	a	a	h	-	a	a	a	h	-	a	h	h	h	-	a	h	-	a	h	a	h	a	h	a	a	a	h	h	h	-	h	h	h	a	a	a	h	h	a	a	a	h	a	h	a	a	h	h
*scaffold3_1293577C	a	a	a	-	a	a	a	-	h	a	-	h	h	h	a	a	h	a	a	-	a	h	a	h	a	a	a	h	h	-	a	-	h	h	a	a	a	-	-	a	a	a	h	a	h	a	a	h	h
*scaffold3_1392043	a	a	a	h	a	a	a	a	h	-	a	h	h	h	a	a	h	a	a	h	a	h	a	h	-	a	a	h	h	h	-	h	h	h	a	a	a	h	h	a	a	-	h	a	h	a	a	h	h
*scaffold3_1534550C	a	a	a	-	a	a	a	a	h	a	a	h	-	h	a	a	h	a	a	-	a	h	a	h	a	a	a	h	-	h	a	h	h	h	a	a	a	-	h	a	a	a	h	a	h	a	a	h	h
*scaffold3_1672338C	a	a	a	-	a	a	a	a	h	a	a	h	-	-	a	a	-	a	a	-	a	-	a	h	a	a	a	h	h	h	a	h	h	h	a	a	a	a	-	a	a	a	h	a	h	a	a	h	h
*scaffold3_1674710	a	a	-	h	-	a	a	a	h	a	a	h	h	h	-	a	h	-	a	h	a	h	a	h	a	a	a	h	h	h	-	h	h	h	a	a	a	h	h	a	a	a	h	a	h	a	a	h	h
*scaffold3_1781197C	a	a	a	h	a	a	a	a	h	a	a	h	h	h	a	a	h	a	a	-	a	h	a	h	a	a	a	h	h	h	a	h	h	-	a	a	a	-	-	a	a	a	h	a	h	a	a	h	h
*scaffold3_1831561C	a	a	a	-	a	a	a	a	h	a	a	h	-	-	a	a	-	a	a	-	a	-	a	h	-	a	a	h	h	h	a	h	h	h	a	a	a	h	h	a	a	a	h	a	h	a	a	h	h
*scaffold3_1903216	a	a	a	h	a	a	a	a	h	-	a	h	h	h	a	a	h	a	a	h	a	h	a	h	a	a	a	h	h	h	a	h	h	h	a	a	a	h	h	a	a	a	h	a	h	a	a	h	h
*scaffold3_2128188	a	a	-	h	-	a	a	a	h	-	a	h	h	a	-	a	h	-	a	h	a	h	a	h	a	a	a	h	h	h	-	h	h	h	a	a	a	h	h	a	a	-	h	a	h	a	a	h	h
*scaffold3_2128340	a	a	-	h	-	a	a	a	h	-	a	h	h	a	-	a	h	-	a	h	a	h	a	h	a	a	a	h	h	h	-	h	h	h	a	a	a	h	h	a	-	-	h	a	h	a	a	h	h
*scaffold3_2236146C	a	a	a	-	a	a	a	a	h	a	a	h	h	a	a	a	h	a	a	-	a	-	a	h	a	a	a	h	h	h	a	h	h	h	a	a	a	h	h	a	a	a	h	a	h	a	a	h	h
*scaffold3_2853708	a	a	-	h	-	a	a	a	h	a	a	h	h	a	-	a	h	a	a	h	a	h	a	h	a	a	-	a	h	h	a	h	h	h	a	-	a	h	h	a	-	-	a	a	h	a	-	h	h
*scaffold3_290420	h	a	h	a	a	a	a	a	a	a	a	h	h	h	a	a	a	-	h	h	h	a	h	h	a	a	a	h	a	-	h	h	h	h	a	h	h	h	h	h	-	h	a	a	a	a	a	h	h
*scaffold3_3024645C	a	a	a	h	a	a	a	a	h	a	a	h	h	a	a	a	h	a	a	-	a	h	a	h	a	a	a	a	h	h	a	h	h	h	a	a	a	h	h	a	a	a	a	a	h	a	a	h	h
*scaffold3_325419C	-	a	h	a	a	a	a	a	a	a	a	h	h	h	a	a	a	a	h	-	h	a	h	h	a	a	a	h	a	a	-	h	h	h	a	h	h	-	-	h	a	h	a	a	a	a	a	h	h
*scaffold3_330199C	h	a	-	a	a	a	a	a	a	a	a	h	h	-	a	a	a	a	h	a	h	a	h	h	a	a	a	h	a	a	-	h	h	h	a	h	h	h	h	h	a	h	a	a	a	a	a	h	h
*scaffold3_330253	h	a	h	-	-	a	a	-	a	a	a	h	h	h	a	a	a	-	h	h	h	-	h	h	a	a	a	h	a	a	h	h	h	h	a	h	h	h	h	h	a	h	a	a	a	a	a	h	h
*scaffold3_480548C	h	a	-	a	a	a	a	a	a	a	a	h	h	-	a	a	a	a	h	-	h	a	h	h	a	a	a	h	a	a	-	h	h	h	a	-	h	-	-	h	a	-	a	a	a	a	a	h	h
*scaffold3_555931	h	a	h	-	-	a	a	a	a	a	a	h	h	h	-	a	-	-	h	h	h	-	h	h	a	a	a	h	a	a	h	h	h	h	a	h	h	h	h	h	a	h	a	a	a	a	a	h	h
*scaffold3_556033C	h	a	-	a	a	a	a	a	a	a	a	h	-	-	a	a	a	a	h	-	-	a	h	h	a	a	a	h	a	a	-	h	h	h	a	h	h	-	h	h	a	h	a	a	a	a	a	h	h
*scaffold3_556188C	h	a	h	a	a	a	a	a	a	a	a	h	h	h	a	a	a	a	h	h	h	a	h	h	a	a	a	h	a	a	h	h	h	h	a	h	h	-	h	h	a	h	a	a	a	a	a	h	h
*scaffold3_583468	h	a	h	-	-	a	a	a	a	a	a	-	h	h	a	a	a	a	h	h	h	-	h	h	a	a	a	h	a	a	h	h	h	h	a	h	h	h	h	h	a	h	a	a	a	a	a	h	h
*scaffold3_583547	h	a	h	-	-	a	a	a	a	a	a	h	h	h	a	a	a	-	h	h	h	-	h	h	a	a	a	h	a	a	h	h	h	h	a	h	h	h	h	h	a	h	-	a	a	a	a	h	h
*scaffold3_941487C	a	a	a	-	a	a	a	a	h	a	a	h	h	h	a	a	h	a	a	a	a	-	a	h	a	a	a	h	h	h	a	h	h	h	a	a	a	-	h	a	a	a	h	a	h	a	a	h	h
*scaffold3_941502	a	a	a	h	a	a	a	a	h	a	a	h	h	h	-	a	h	-	a	h	a	h	a	h	a	a	a	h	h	h	-	h	h	h	a	a	a	h	h	a	a	a	h	a	h	a	a	h	h
*scaffold3_942495	a	h	h	h	a	a	a	a	a	h	a	h	h	h	h	-	h	h	a	-	a	h	a	h	-	h	h	a	h	a	h	h	a	a	a	a	a	h	a	h	a	h	a	-	a	a	h	h	a
*scaffold3_942600C	a	h	a	a	h	a	h	a	h	h	h	a	a	-	a	a	a	a	a	-	h	a	a	h	a	h	h	h	h	a	h	a	a	a	h	h	a	h	h	a	h	a	a	a	h	a	h	h	a
*scaffold3_942616C	a	h	a	a	h	a	h	a	h	h	h	a	a	-	a	a	a	a	a	-	h	a	a	h	a	h	h	h	h	a	h	a	a	a	h	h	a	h	h	a	h	a	a	a	h	a	h	h	a
*scaffold3_942692	a	a	a	h	-	a	a	a	h	a	a	h	h	h	a	a	h	a	a	h	a	h	a	h	a	a	a	h	h	h	a	h	h	h	a	-	a	h	h	a	a	a	h	a	h	a	a	h	h
*scaffold3_942693	a	h	h	h	-	a	a	a	a	h	a	h	h	h	h	h	h	h	a	-	a	h	a	h	h	h	h	a	h	a	h	h	a	a	a	-	a	h	-	h	-	h	a	h	a	a	h	h	a
*scaffold3_942699	a	h	h	h	-	a	a	a	a	h	a	h	h	h	h	h	h	h	a	-	a	h	a	h	h	h	h	a	h	a	h	h	a	a	a	-	a	h	-	h	a	h	a	h	a	a	h	h	a
*scaffold3_942709	a	h	h	h	-	a	a	a	a	h	a	h	h	h	h	h	h	h	a	a	a	h	a	h	h	h	h	a	h	a	h	h	a	a	a	-	a	h	a	h	a	h	a	h	a	a	h	h	a
*scaffold3_942743	a	a	a	h	-	a	a	a	h	a	a	h	h	h	a	a	h	a	a	h	a	h	a	h	a	a	a	h	h	h	a	h	h	h	a	-	a	h	h	a	a	a	h	a	h	a	a	h	h
*scaffold3_98888	h	a	h	-	-	a	a	a	a	a	-	h	h	h	-	a	-	-	h	h	h	-	h	h	a	a	a	h	a	a	h	h	h	h	a	h	h	h	h	h	a	h	a	a	a	a	a	h	h
*scaffold3_99728C	h	a	-	a	a	a	a	a	a	a	a	h	-	h	a	a	a	a	h	-	h	a	h	h	a	a	a	h	-	a	-	h	h	h	a	h	h	h	-	-	a	h	a	a	a	a	a	h	h
*scaffold30_1169497C	a	h	h	-	h	h	h	-	a	a	h	a	a	h	h	a	h	-	h	a	h	-	h	a	a	a	h	h	a	a	a	a	a	a	h	a	h	-	a	a	h	a	h	h	a	a	h	h	a
*scaffold30_1169578C	a	-	a	-	a	a	a	a	h	a	a	h	h	a	a	a	h	a	a	-	a	-	a	h	h	a	a	a	h	h	a	h	h	a	a	-	a	-	h	a	a	a	a	a	a	a	a	h	h
*scaffold30_1371242C	a	h	h	-	h	h	h	a	a	a	h	a	a	h	-	a	-	a	h	a	h	h	h	a	a	a	-	h	a	a	a	a	a	a	h	a	h	-	a	a	h	a	h	h	a	a	h	h	a
*scaffold30_349177C	a	h	h	-	-	h	h	a	a	a	h	a	a	h	h	a	h	a	h	a	h	h	h	a	a	a	h	h	a	a	a	a	a	a	h	a	h	h	a	a	h	a	h	h	a	a	h	h	a
*scaffold30_707805	a	h	h	h	h	h	h	a	a	a	h	a	a	h	h	a	h	-	h	h	h	h	h	a	a	a	h	h	a	-	-	a	a	a	h	a	-	h	-	a	h	a	h	h	a	a	h	h	a
*scaffold30_707896	a	h	h	h	h	h	h	a	a	a	h	a	a	h	h	a	h	a	h	-	h	h	h	a	a	a	h	h	a	a	-	-	a	a	h	a	h	h	a	a	h	a	h	h	a	a	h	h	a
*scaffold30_708174C	a	h	h	-	h	h	h	a	a	a	h	a	a	-	h	a	h	a	h	a	h	-	h	a	a	a	-	h	a	a	a	a	a	a	h	a	h	-	a	a	-	a	h	h	a	a	h	h	a
*scaffold30_783186C	a	h	h	-	h	h	h	a	a	a	h	a	a	h	h	a	h	a	h	a	h	-	h	a	a	a	h	h	a	a	a	a	a	a	h	a	h	-	a	a	h	a	h	h	a	a	h	h	a
*scaffold300_67312	a	a	a	h	a	a	a	a	h	h	a	h	h	a	-	a	h	a	a	h	a	h	a	h	h	h	a	a	h	h	a	a	h	a	a	a	a	h	h	a	a	a	a	a	a	a	-	h	h
*scaffold300_67501C	a	a	a	h	a	a	a	a	h	-	a	h	h	a	a	a	h	a	a	-	a	h	a	h	h	h	a	a	h	h	a	a	h	a	a	a	a	-	h	a	a	a	a	a	a	a	a	h	h
*scaffold300_67502	a	a	a	h	a	a	a	a	h	h	a	h	h	a	-	a	h	a	a	h	a	h	a	h	h	h	a	a	h	h	a	a	h	a	a	a	a	h	h	a	a	a	a	a	a	a	-	h	h
*scaffold306_451773C	h	h	a	a	-	a	h	h	h	h	a	-	a	h	h	h	h	a	h	a	-	-	a	a	a	a	a	a	h	h	-	a	h	h	h	-	h	h	h	h	h	a	a	h	a	a	h	a	h
*scaffold308_109139C	a	a	a	a	a	a	h	h	a	h	h	a	a	a	h	a	h	-	h	a	a	a	h	h	h	h	h	a	h	h	a	h	a	h	h	a	h	a	a	h	a	h	h	h	a	a	h	h	a
*scaffold309_444921C	a	h	h	h	h	a	a	a	a	h	a	h	h	a	h	h	h	-	a	a	h	-	a	a	h	a	h	a	a	a	h	a	a	a	a	a	a	a	h	h	a	a	a	h	a	h	h	h	a
*scaffold309_444942	a	h	h	h	h	a	a	a	a	h	a	h	h	a	h	h	h	h	a	a	h	h	a	a	h	a	h	a	a	a	h	a	a	a	a	a	a	a	h	h	a	a	a	h	a	h	h	h	a
*scaffold309_509164	a	h	h	h	h	a	a	a	a	h	a	h	h	a	h	h	h	h	a	-	h	h	a	a	h	h	h	a	a	a	h	a	a	a	a	a	a	-	h	h	a	a	a	h	a	h	h	h	a
*scaffold31_1308809C	h	a	a	a	h	h	h	a	a	h	h	a	a	h	h	a	h	a	h	h	h	h	a	h	h	a	a	a	h	h	h	a	h	h	h	a	h	-	h	a	h	a	h	h	h	a	a	a	h
*scaffold31_1474436C	h	a	a	a	h	h	h	a	a	h	h	a	a	h	h	a	h	h	h	-	h	-	a	h	h	a	a	a	h	h	-	a	h	h	h	a	h	h	h	a	h	a	h	h	h	a	a	a	h
*scaffold31_1640836	h	a	a	a	h	h	h	a	a	h	h	a	a	h	h	a	h	h	h	h	h	h	a	h	h	a	a	a	h	h	h	a	h	h	h	a	h	h	h	a	h	a	h	h	h	a	a	a	h
*scaffold31_1822086C	h	a	a	a	h	h	h	a	a	h	h	a	a	h	h	a	h	h	h	-	h	-	a	h	h	a	a	a	h	-	h	a	a	h	h	a	h	-	-	a	h	a	h	h	h	a	a	a	h
*scaffold31_204729C	h	a	a	a	-	h	h	a	a	-	a	a	a	h	-	a	h	a	h	a	a	h	a	h	h	a	a	a	h	h	-	a	h	h	h	a	h	-	-	a	h	a	h	h	h	a	a	a	h
*scaffold31_259311	h	a	a	-	h	h	h	a	a	h	a	a	a	h	h	a	h	a	h	a	a	h	a	h	h	a	a	a	h	h	h	a	h	h	h	-	h	h	h	a	h	a	h	h	h	a	a	-	h
*scaffold31_259326	h	a	a	-	h	h	h	a	a	h	a	a	a	h	h	a	h	a	h	a	a	h	a	h	h	a	a	a	h	h	h	a	h	h	h	-	h	h	h	a	h	a	h	h	h	a	a	-	h
*scaffold31_342563C	h	a	a	a	h	h	h	a	a	h	a	a	a	-	-	a	h	a	h	a	a	-	a	h	h	a	a	a	h	h	h	a	h	h	h	a	h	h	h	a	h	a	h	h	h	a	a	a	h
*scaffold31_342647	h	a	a	a	h	h	h	a	a	h	a	a	a	h	h	a	h	a	h	-	a	h	a	h	h	a	a	a	h	h	h	a	h	h	h	a	h	h	h	a	h	a	h	h	h	a	a	a	h
*scaffold31_392776C	-	a	a	a	h	h	h	a	a	h	a	a	a	h	h	a	h	a	-	a	a	-	a	h	h	a	a	a	h	h	-	a	h	h	-	a	h	-	h	a	h	a	h	h	h	a	a	a	h
*scaffold31_392899	h	-	a	-	h	h	h	a	a	h	a	a	a	h	h	a	h	a	h	-	a	h	a	h	h	a	a	a	h	h	h	a	h	h	h	a	h	h	h	a	h	a	h	h	h	a	a	a	h
*scaffold31_722503	h	a	a	-	h	h	h	a	a	h	h	a	a	h	h	a	h	a	h	-	h	h	a	h	h	a	a	a	h	h	h	-	h	h	h	-	h	h	h	a	h	a	h	h	h	a	a	a	h
*scaffold31_747621C	a	a	a	a	h	h	h	a	a	h	h	a	a	h	h	a	h	a	h	a	h	h	a	h	h	a	a	a	h	h	h	a	h	h	h	a	h	-	-	a	h	a	h	h	h	a	a	a	h
*scaffold31_747640C	a	a	a	a	h	h	h	a	a	h	h	a	a	h	h	a	h	a	h	a	h	h	a	h	h	a	a	a	h	h	h	a	h	h	h	a	h	-	-	a	h	a	h	h	h	a	a	a	h
*scaffold312_455360	a	h	a	a	h	h	a	h	a	-	h	a	a	h	a	a	h	h	a	-	a	h	h	h	h	a	h	a	a	h	h	a	h	a	h	h	a	-	-	h	h	a	a	-	h	h	a	a	a
*scaffold316_130470	a	h	h	h	h	a	a	a	a	h	a	h	h	a	h	h	h	h	a	-	h	h	a	a	h	a	h	h	a	-	h	a	a	h	-	a	a	a	h	a	h	a	a	h	a	h	h	a	a
*scaffold316_210598C	a	h	h	h	h	a	a	a	a	h	a	h	h	a	h	h	h	h	a	a	h	-	a	a	h	a	-	h	a	a	-	a	a	h	a	a	a	a	h	a	h	a	-	h	a	h	-	a	a
*scaffold316_227693C	a	h	h	-	h	a	a	a	a	h	a	h	-	a	-	h	h	-	a	a	h	-	a	a	h	a	h	h	a	a	-	a	a	h	a	a	a	a	-	a	h	a	a	h	a	h	h	a	a
*scaffold316_27652	a	h	h	h	h	a	a	a	a	h	a	h	h	a	h	h	h	h	a	a	h	h	a	a	h	a	h	h	a	a	h	a	a	h	a	a	a	a	h	a	h	a	a	h	a	h	h	a	a
*scaffold316_71442	a	h	h	h	h	a	a	a	a	h	a	h	h	a	h	h	h	h	-	-	h	h	a	a	h	a	h	h	a	a	h	a	a	h	a	a	a	a	h	a	h	a	a	h	a	h	h	a	a
*scaffold316_71448C	a	h	h	h	h	a	a	a	a	h	a	h	h	a	h	h	h	h	a	a	h	-	a	a	h	a	h	h	a	a	-	a	a	h	a	a	a	a	h	a	h	a	a	h	a	h	h	a	a
*scaffold318_357364	a	h	-	-	h	h	h	a	a	h	h	a	a	h	a	a	a	-	a	h	a	h	h	a	a	a	a	a	a	h	-	a	h	a	h	-	a	h	a	a	h	h	h	h	a	h	h	a	-
*scaffold318_462086	-	h	h	-	h	h	h	a	a	h	h	a	-	h	a	a	a	h	a	h	a	h	h	a	a	a	a	a	a	h	-	a	h	a	h	a	a	h	a	a	h	h	h	h	a	h	h	a	h
*scaffold319_261504	h	h	a	a	a	a	h	h	h	-	a	a	a	a	h	h	h	a	h	h	h	-	h	h	h	a	h	h	h	a	h	-	a	a	a	a	h	-	h	h	a	a	a	h	h	h	h	a	a
*scaffold32_1265351	h	h	a	h	a	h	h	a	a	h	h	a	a	a	a	h	h	a	a	-	a	h	h	h	a	a	h	a	h	a	h	a	a	a	a	a	a	h	-	h	a	a	a	a	a	a	a	a	h
*scaffold32_141957	h	h	-	h	a	h	h	a	a	h	h	a	-	a	-	h	h	-	a	-	a	h	h	h	a	a	h	a	h	a	h	a	a	a	a	-	a	h	a	h	a	a	a	a	a	a	a	a	h
*scaffold32_1437834	h	h	a	h	a	h	h	a	a	h	h	a	a	a	a	h	h	a	a	-	a	h	h	h	a	a	h	a	h	a	h	a	a	h	a	a	a	h	a	h	a	a	a	a	a	a	a	a	h
*scaffold32_1437850C	h	h	a	h	a	h	h	a	a	h	h	a	a	a	a	h	h	a	a	a	a	h	h	h	a	a	h	a	h	a	h	a	a	h	a	a	a	h	a	h	a	a	a	a	a	a	a	a	h
*scaffold32_1527672	h	h	a	h	a	h	h	a	a	h	h	a	a	a	a	h	h	a	a	-	a	h	h	h	a	a	h	a	h	a	h	a	a	h	a	a	a	h	a	h	a	a	a	a	a	a	a	a	h
*scaffold32_1531611	h	h	-	h	-	h	h	a	a	h	h	a	-	a	-	h	h	-	a	-	a	h	h	h	a	a	h	a	h	a	h	a	a	h	a	a	a	h	a	h	a	a	a	a	a	a	a	a	h
*scaffold32_1599750C	h	h	a	-	a	h	h	a	a	h	h	a	a	a	a	h	h	a	a	a	a	-	h	h	a	a	h	a	h	a	h	a	a	h	a	a	a	h	a	h	a	a	a	a	a	a	a	a	h
*scaffold32_1701281	h	-	a	h	a	h	h	a	a	h	h	a	a	a	a	h	h	a	a	-	a	h	h	h	a	a	h	a	h	a	h	a	a	h	a	a	a	h	a	h	a	a	a	a	a	a	a	a	h
*scaffold32_1706558	h	h	a	h	a	h	h	a	a	h	h	a	a	a	a	h	h	-	a	-	a	h	h	h	a	a	h	a	h	a	h	-	a	h	a	a	a	h	-	h	a	a	a	a	a	a	a	a	h
*scaffold32_244742	h	h	-	h	a	h	h	a	a	h	h	-	a	-	-	-	h	a	a	-	a	h	h	h	a	a	h	a	-	a	h	-	a	a	a	a	a	h	a	-	a	a	a	a	a	a	a	a	h
*scaffold32_244794C	h	h	a	h	a	h	h	a	a	h	h	a	a	a	a	h	h	a	a	a	a	h	h	h	a	a	h	a	h	a	h	a	a	a	a	a	a	h	a	h	a	a	a	a	a	a	a	a	h
*scaffold32_252968	h	h	-	h	-	h	h	a	a	h	h	a	-	a	-	h	h	-	a	-	a	h	h	h	a	a	h	a	h	a	h	a	a	a	a	-	a	h	-	h	a	a	a	a	a	a	a	a	h
*scaffold32_252986	h	h	-	h	-	h	h	a	a	h	h	a	-	a	-	h	h	-	a	-	a	h	h	h	a	a	h	a	h	a	h	a	a	a	a	a	a	h	-	h	a	a	a	a	a	a	a	a	h
*scaffold32_435788	h	h	a	h	a	h	h	a	a	h	h	a	a	a	a	h	h	a	a	a	a	h	h	h	a	a	h	a	h	a	h	a	a	a	a	a	a	h	a	h	a	a	a	a	a	a	-	a	h
*scaffold32_438345	h	h	-	h	-	h	h	a	a	h	h	a	-	a	a	h	h	a	a	-	a	h	h	h	a	a	h	a	h	a	h	a	a	a	a	a	a	h	-	h	a	a	a	a	a	a	a	a	h
*scaffold32_526996	h	h	a	h	a	h	h	a	a	h	h	a	a	a	a	h	h	a	a	-	a	h	h	h	a	a	h	a	h	a	h	a	a	a	a	-	a	h	a	h	a	a	a	a	a	a	a	a	h
*scaffold32_562509	h	h	-	h	-	h	h	a	a	h	h	a	-	-	-	h	h	-	a	h	a	h	h	h	a	a	h	a	h	a	h	a	a	a	a	a	a	h	a	h	a	a	a	a	a	a	a	a	h
*scaffold32_844387	h	h	a	h	a	h	h	a	a	h	h	a	-	a	-	h	h	-	a	-	a	h	h	h	a	a	h	a	h	a	h	-	a	a	a	a	a	h	a	h	a	a	a	a	a	a	a	a	h
*scaffold32_894162	h	h	a	h	a	-	h	a	a	h	h	a	a	a	a	h	h	a	a	-	a	h	h	h	a	a	h	a	h	a	h	a	a	a	a	a	a	h	a	h	a	a	a	a	a	a	a	a	h
*scaffold325_159142	h	a	h	-	a	a	a	a	h	h	a	a	a	a	h	a	a	a	h	-	a	-	a	a	a	a	a	h	h	-	h	h	a	h	h	h	h	a	h	a	a	h	a	a	h	h	a	h	h
*scaffold325_159145	h	a	h	-	-	a	a	a	h	h	a	a	a	a	h	a	a	a	h	-	a	-	a	a	a	a	a	h	h	-	h	h	a	h	h	h	h	a	h	a	a	h	a	a	h	h	a	h	h
*scaffold326_156198	h	a	-	h	-	h	a	h	a	h	h	a	-	-	-	a	h	h	h	-	h	-	h	a	a	a	h	a	h	a	h	a	a	a	h	a	h	a	a	h	a	h	h	a	a	h	h	h	a
*scaffold326_476057C	h	a	a	-	a	h	a	h	a	h	h	a	a	a	a	a	h	-	-	a	h	-	h	a	a	a	h	-	h	a	h	a	a	a	h	a	h	a	a	h	a	h	h	a	a	h	h	h	a
*scaffold326_476068C	h	a	a	-	a	h	a	h	a	h	h	a	a	a	a	a	-	-	h	a	h	-	h	a	a	a	h	-	h	a	h	a	a	a	h	a	h	a	a	h	a	h	h	a	a	h	h	h	a
*scaffold327_124298	a	h	a	h	h	h	a	a	a	h	a	h	h	h	a	h	h	-	h	h	h	-	a	a	a	h	a	a	a	h	-	h	a	a	a	-	h	h	h	a	h	a	h	h	h	h	a	a	a
*scaffold327_254080	a	h	a	h	h	h	a	a	a	h	a	h	h	h	a	h	h	a	h	h	h	a	a	a	a	h	a	a	a	h	a	h	a	a	a	a	h	h	h	a	h	a	h	h	h	h	a	a	a
*scaffold329_212158C	a	a	h	a	h	h	a	a	h	h	h	a	a	a	a	a	a	a	a	h	h	h	h	a	a	a	a	h	a	h	-	a	a	h	h	a	a	h	h	a	h	h	h	h	h	h	-	a	h
*scaffold33_1564409	a	a	-	h	h	h	a	h	a	-	a	a	-	h	-	a	h	-	a	-	h	h	h	a	a	a	a	a	a	h	-	a	h	a	h	h	a	-	-	h	a	a	a	a	h	h	a	a	a
*scaffold33_316519	a	a	a	h	h	h	a	h	a	a	a	a	a	h	a	a	h	a	a	-	h	h	h	a	a	a	a	a	a	h	a	a	h	a	h	h	a	a	a	h	-	a	a	a	h	h	a	a	a
*scaffold33_643871	a	a	a	h	h	h	a	h	a	a	-	a	-	h	a	a	h	-	a	-	h	h	h	a	a	a	a	a	a	h	-	-	h	a	h	h	a	-	a	h	a	a	-	a	h	h	a	a	a
*scaffold33_643988	a	a	a	h	h	h	a	h	a	a	-	a	-	h	-	a	h	-	a	-	h	h	h	a	a	a	a	a	a	h	-	-	h	a	h	h	a	-	a	h	a	a	-	a	h	h	a	a	a
*scaffold33_799033	a	a	a	h	h	h	a	h	a	a	a	a	a	h	a	a	h	a	a	h	h	h	h	a	a	a	a	a	a	h	a	a	h	a	h	h	a	a	a	h	a	a	a	a	h	h	a	a	a
*scaffold33_898650	a	a	a	h	h	h	a	h	a	a	a	a	a	h	a	a	h	a	a	-	h	h	h	a	a	a	a	a	a	h	a	a	h	a	h	h	a	a	a	h	a	a	a	a	h	h	a	a	a
*scaffold33_898684	a	a	a	h	h	h	a	h	a	a	a	a	a	h	a	a	h	a	a	a	h	h	h	a	a	a	a	a	a	h	a	a	h	a	h	h	a	a	a	h	a	a	a	a	h	h	a	a	a
*scaffold330_108663C	a	h	a	a	a	a	h	h	h	-	a	a	a	-	h	h	h	a	h	a	a	-	h	a	a	a	a	a	h	h	-	a	h	h	h	a	h	a	h	h	h	a	a	h	a	a	h	a	h
*scaffold330_421864C	a	h	a	a	a	a	h	h	h	h	a	a	a	h	h	h	h	a	h	a	a	-	h	a	a	a	a	a	h	h	h	a	h	h	h	a	h	a	-	h	h	a	a	h	a	a	h	a	h
*scaffold332_216132	a	h	a	h	a	a	h	a	h	a	h	a	a	a	a	h	a	h	h	h	h	-	-	h	h	h	a	h	a	h	h	-	h	a	a	h	h	-	-	h	h	h	h	a	h	h	a	a	h
*scaffold333_122836C	a	h	h	a	-	h	h	a	a	h	h	a	a	h	a	a	a	h	a	-	a	h	h	a	a	a	a	a	a	h	a	a	h	a	h	a	a	-	a	a	h	-	h	h	a	h	h	a	h
*scaffold333_158399C	a	h	-	a	-	h	h	a	a	h	h	a	a	-	a	a	a	h	a	-	a	-	-	a	a	a	a	a	a	h	a	a	h	a	-	a	a	-	a	a	h	h	h	h	a	h	h	a	h
*scaffold333_366013C	a	h	h	a	h	h	h	a	a	-	h	a	a	h	a	a	a	h	a	h	a	-	h	a	a	a	a	a	a	h	a	a	h	a	h	a	a	h	a	a	h	h	h	h	a	h	-	a	h
*scaffold333_86621	a	h	h	-	-	h	h	a	a	h	h	a	a	h	a	a	a	h	a	h	a	h	h	a	a	a	-	a	a	h	a	a	h	a	h	a	a	h	a	a	h	h	h	h	a	h	h	a	h
*scaffold333_86731	a	h	h	-	-	h	h	a	a	h	h	a	a	h	a	a	a	h	a	h	a	h	h	a	a	a	a	a	a	h	a	a	h	a	h	a	a	h	a	a	h	h	h	h	a	h	h	a	h
*scaffold333_86754	a	h	h	-	-	h	h	a	a	h	h	a	a	h	a	a	a	h	a	h	a	h	h	a	a	a	a	a	a	h	a	a	h	a	h	a	a	h	a	a	h	h	h	h	a	h	h	a	h
*scaffold334_324367	-	a	h	h	h	a	a	h	h	a	h	a	a	h	h	a	a	a	a	a	h	a	h	a	a	a	h	h	h	-	-	a	h	h	a	a	a	h	h	a	a	a	h	a	a	h	a	h	h
*scaffold335_121388	h	a	-	-	h	h	a	a	a	h	h	a	a	a	-	a	h	h	h	h	h	h	a	h	h	a	h	a	h	a	-	a	a	a	h	a	h	h	-	a	a	h	h	a	h	a	a	a	h
*scaffold337_29204C	h	a	a	-	h	a	h	h	h	h	a	a	a	a	h	h	h	h	h	-	a	a	h	a	h	h	h	a	h	h	a	a	h	h	a	h	h	a	h	a	a	a	a	h	h	h	h	h	h
*scaffold337_31407C	h	a	a	h	h	a	h	h	h	h	a	a	a	a	h	h	h	h	h	-	a	a	h	a	h	h	h	a	h	-	a	a	h	h	a	h	h	a	h	a	a	a	a	h	h	h	h	h	h
*scaffold337_410883C	a	a	h	a	h	-	a	a	a	h	h	a	a	a	a	a	a	a	a	-	h	h	h	a	h	a	a	h	a	-	h	a	a	h	h	a	a	-	h	a	h	h	h	h	-	h	h	a	h
*scaffold339_148333	h	a	a	h	h	-	h	h	h	a	h	h	h	h	h	a	h	a	a	h	h	a	h	h	a	h	h	h	a	a	h	a	h	a	h	a	a	h	-	a	-	h	a	h	h	h	a	h	a
*scaffold339_164272C	h	a	a	h	h	-	h	h	h	a	h	h	h	h	h	a	h	a	a	-	h	a	h	h	a	h	h	h	a	a	h	a	h	a	h	a	a	h	a	a	a	h	a	h	h	h	a	h	a
*scaffold339_396650	h	a	a	-	h	h	h	h	-	a	h	h	h	h	h	a	h	a	a	h	h	a	h	h	a	h	h	h	a	a	h	a	h	a	h	a	a	h	a	a	a	h	a	h	h	h	a	h	a
*scaffold339_435326C	h	-	a	h	h	h	h	h	h	a	h	h	h	h	h	a	h	a	a	h	h	a	h	h	a	h	h	h	a	a	h	a	h	a	h	a	a	h	a	a	a	h	a	h	h	h	a	h	a
*scaffold339_435337C	h	-	a	h	h	h	h	h	h	a	h	h	h	h	h	a	h	a	a	h	h	a	h	h	a	h	h	h	a	a	h	a	h	a	h	a	a	h	a	a	a	h	a	h	h	h	a	h	a
*scaffold339_70211	h	a	a	h	h	-	h	h	h	a	h	h	h	h	h	a	h	a	a	h	h	a	h	h	a	h	h	h	a	a	h	a	h	a	h	a	a	h	a	a	a	h	a	h	h	h	a	h	a
*scaffold339_70239	h	a	a	h	h	-	h	h	h	-	h	h	h	h	h	a	h	a	a	h	h	-	h	h	a	h	h	h	a	a	h	a	h	a	h	-	a	h	a	a	a	h	a	h	h	h	a	h	a
*scaffold339_86597C	h	a	a	-	h	h	h	h	h	a	h	h	h	h	h	a	h	a	a	-	h	a	h	h	a	h	h	h	a	a	-	a	h	a	h	a	a	-	a	a	a	h	a	h	h	h	a	h	a
*scaffold34_1648499	a	-	a	-	h	h	a	h	a	a	h	a	a	h	-	a	h	h	a	-	a	h	h	a	h	a	h	a	a	h	a	a	h	a	h	h	a	a	a	h	a	a	-	a	h	h	a	a	a
*scaffold34_736882	a	h	-	-	h	h	a	h	a	a	h	a	-	h	-	a	h	h	a	-	a	h	h	a	h	a	h	a	a	h	a	a	h	a	h	h	a	-	a	h	a	-	a	a	h	h	a	a	a
*scaffold340_119690	a	h	a	a	a	h	a	a	h	-	h	a	a	h	a	a	h	h	a	h	a	h	h	h	h	a	a	a	a	h	h	a	h	a	h	h	a	-	-	h	h	a	a	h	h	h	a	a	a
*scaffold340_127422C	a	h	a	a	a	h	a	a	h	a	h	a	a	h	a	a	h	h	a	a	a	h	h	h	h	a	a	a	a	h	-	a	h	a	h	h	a	a	a	h	h	a	a	h	h	h	a	a	a
*scaffold340_266764C	a	h	a	a	a	h	a	a	h	a	h	a	a	h	a	a	h	h	a	a	a	h	h	h	h	a	a	a	a	h	h	h	h	a	h	h	a	a	a	h	h	a	a	h	h	h	a	a	a
*scaffold340_288965C	a	h	a	a	a	h	a	a	h	a	h	a	a	-	a	a	h	h	a	a	a	-	h	h	h	a	a	a	a	h	-	h	h	a	h	-	a	a	a	h	h	a	a	h	h	h	a	a	a
*scaffold340_81251	a	h	a	a	a	h	a	a	h	-	h	a	a	h	a	a	h	h	a	-	a	h	h	h	h	a	a	a	a	h	h	a	h	a	h	h	a	-	a	h	h	-	a	h	h	h	a	a	a
*scaffold340_81432C	a	h	a	a	a	h	a	a	h	a	h	a	a	h	a	a	h	h	a	a	-	-	h	h	h	a	a	a	a	h	-	a	h	a	h	h	a	a	a	h	h	a	a	h	h	h	a	a	a
*scaffold340_85018C	a	h	a	a	a	h	a	a	h	a	-	a	a	h	a	a	h	-	a	a	a	-	h	h	h	a	a	a	a	h	h	a	h	a	h	h	a	a	a	h	h	a	a	h	h	h	a	a	a
*scaffold341_26284	a	h	h	h	h	a	a	h	h	h	h	a	-	-	h	a	-	h	a	-	a	-	h	a	a	a	h	h	h	a	h	a	h	h	a	a	a	h	h	a	a	a	h	a	a	h	a	h	h
*scaffold342_215710	h	-	a	h	a	h	h	h	a	h	h	h	h	a	a	a	a	h	h	h	a	h	-	h	h	a	h	a	a	h	a	h	h	h	h	a	h	h	h	a	a	a	a	h	h	h	a	a	h
*scaffold343_159580C	h	h	-	-	-	a	a	h	a	a	a	a	a	a	a	a	-	a	a	a	h	a	a	h	h	a	a	h	a	h	h	h	h	a	a	a	a	-	h	h	h	a	h	a	a	h	a	a	h
*scaffold343_204393C	h	h	h	h	h	a	a	h	a	a	-	a	a	a	a	a	h	a	a	a	h	a	a	h	h	a	a	h	a	h	-	h	h	a	a	a	a	-	-	h	h	a	h	a	a	h	a	a	h
*scaffold343_248753C	h	h	-	-	-	a	a	h	a	a	a	a	a	a	a	a	-	a	a	a	h	a	a	h	h	a	a	h	a	h	-	h	h	a	a	a	a	-	-	h	h	a	h	a	a	h	a	a	h
*scaffold343_293752C	h	h	h	-	h	a	a	h	a	a	a	a	a	a	a	a	h	a	a	a	h	a	a	h	h	a	a	h	a	h	h	h	h	a	a	a	a	h	h	h	h	a	h	a	a	h	a	a	h
*scaffold343_293852C	h	h	h	-	h	a	a	h	a	a	a	a	a	a	a	a	h	a	a	a	h	a	a	h	h	a	a	h	a	h	h	h	h	a	a	a	a	h	h	h	h	a	h	a	a	h	a	a	h
*scaffold343_293895	h	h	h	h	h	a	a	h	a	a	a	a	a	a	a	a	h	a	a	-	h	-	a	h	h	a	a	h	a	h	h	h	h	a	a	a	a	h	h	h	h	a	h	a	a	h	a	a	h
*scaffold343_52102	h	h	h	h	h	a	a	h	a	a	a	a	a	a	-	a	h	a	a	-	h	a	a	h	h	a	a	h	a	h	h	h	h	a	a	a	a	h	h	h	h	a	h	a	a	h	a	a	h
*scaffold344_231258	a	h	h	h	h	a	h	a	a	h	h	a	a	h	h	a	a	a	h	h	h	h	h	a	a	a	-	h	h	a	a	a	a	a	h	-	h	h	a	a	h	a	h	h	h	a	h	h	h
*scaffold349_30802C	a	h	h	-	a	a	a	a	a	h	a	h	h	h	h	h	h	h	a	a	a	h	a	h	-	h	h	a	h	-	h	h	h	a	a	a	a	h	-	h	-	-	a	h	a	a	h	h	a
*scaffold35_133199	h	h	h	-	a	a	a	a	h	h	h	a	a	a	h	h	-	-	h	h	a	-	a	a	a	a	a	h	h	h	h	h	a	a	h	h	h	a	h	a	a	h	a	a	h	h	a	h	h
*scaffold35_1360292	h	h	h	a	h	a	a	a	h	h	-	a	a	a	a	h	a	a	h	h	a	-	a	a	a	a	a	a	h	h	h	h	a	a	h	h	h	a	h	a	a	h	a	a	h	h	a	h	h
*scaffold35_1360419	h	h	h	a	h	a	a	a	h	h	h	a	a	a	a	h	a	a	h	h	a	-	a	a	a	a	a	a	h	h	h	h	a	a	h	h	h	a	h	a	a	h	a	a	h	h	a	h	h
*scaffold35_1365747C	h	h	h	a	h	a	a	a	h	h	h	a	a	a	a	h	a	a	h	-	a	a	a	a	a	a	a	a	h	h	h	-	a	a	h	h	h	a	h	a	a	h	a	a	h	h	a	h	h
*scaffold35_1365863	h	h	h	-	h	a	a	a	h	h	h	a	a	a	a	h	a	a	h	h	a	a	a	a	a	a	a	a	h	h	h	h	a	a	h	h	h	a	h	a	a	h	a	a	h	h	a	h	h
*scaffold35_1383448C	h	h	-	a	h	a	a	a	h	-	h	a	a	a	a	h	a	a	h	-	a	a	a	a	a	a	a	a	h	h	h	h	a	a	h	h	h	a	h	a	a	h	a	a	h	h	a	h	h
*scaffold35_1601875	h	h	h	a	h	a	a	a	h	h	h	a	a	a	a	h	a	a	h	h	a	-	a	a	a	a	a	a	h	h	h	h	a	a	h	h	h	a	h	a	a	h	a	a	h	h	a	h	h
*scaffold35_1635671C	h	h	h	a	h	a	a	a	h	h	h	a	a	a	a	h	a	a	h	-	a	a	a	a	a	a	a	a	h	h	h	h	a	a	h	h	h	a	h	a	a	h	a	a	h	h	a	h	h
*scaffold35_1665330C	h	h	h	a	-	a	a	a	h	h	h	a	a	a	a	h	a	a	h	-	a	a	a	a	a	a	a	-	h	h	h	h	-	a	h	-	h	a	h	a	a	-	a	a	h	h	a	h	h
*scaffold35_327717	h	h	h	-	a	a	a	a	h	h	h	a	a	a	h	h	a	a	h	h	a	a	a	a	a	a	a	h	h	h	h	h	a	a	h	h	h	a	h	a	a	h	a	a	h	h	a	h	h
*scaffold35_327724	h	h	h	-	a	a	a	a	h	h	h	a	a	a	h	h	a	a	h	h	a	a	a	a	a	a	a	h	h	h	h	h	a	a	h	h	h	a	h	a	a	h	a	a	h	h	a	h	h
*scaffold35_332777	h	h	h	-	-	a	a	a	h	h	h	a	-	a	h	h	-	-	h	h	a	-	a	a	a	a	a	h	h	h	h	h	a	a	h	h	h	-	h	a	a	h	a	a	h	h	a	h	h
*scaffold35_422994C	h	h	-	a	a	a	a	a	h	h	-	a	a	a	h	h	a	a	h	-	a	a	a	a	a	a	a	h	h	h	h	h	a	a	h	h	h	a	h	a	a	h	a	a	h	h	a	h	h
*scaffold35_464120C	h	h	h	a	a	a	a	a	h	h	h	a	a	a	h	h	a	a	h	-	a	a	a	a	a	a	a	h	h	h	h	h	a	a	h	h	h	a	h	a	a	h	a	a	h	h	a	h	h
*scaffold35_464166	h	h	h	a	a	a	a	a	h	h	h	a	a	a	h	h	a	a	h	h	a	-	a	a	a	a	a	h	h	h	h	h	a	a	h	h	h	a	h	a	a	h	a	a	h	h	a	h	h
*scaffold35_465466C	h	h	h	a	a	a	-	a	h	h	h	a	a	a	h	h	a	a	h	-	a	a	a	a	a	a	a	h	h	h	h	h	a	a	h	h	h	a	h	-	a	h	a	a	h	h	a	h	h
*scaffold35_465475C	h	h	h	a	a	a	-	a	h	h	h	a	a	a	h	h	a	a	h	-	a	a	a	a	a	a	a	h	h	h	h	h	a	a	h	h	h	a	h	-	a	h	a	a	h	h	a	h	h
*scaffold35_465606C	h	h	h	a	a	a	a	a	h	h	h	a	a	a	h	h	a	a	h	-	a	a	a	a	a	a	a	h	h	h	h	h	a	a	h	h	h	a	h	a	a	h	a	a	h	h	a	h	h
*scaffold35_545284	h	h	h	-	a	a	a	a	h	h	h	a	a	a	h	h	a	a	h	h	a	a	a	a	a	a	a	h	h	h	h	h	a	a	h	h	h	a	h	a	h	h	a	a	h	h	a	h	h
*scaffold350_284199	h	a	h	-	-	a	a	a	a	a	a	h	h	h	a	a	a	h	h	h	a	-	h	h	a	a	a	h	a	a	a	h	h	h	a	h	h	h	h	h	a	h	a	a	a	a	-	h	h
*scaffold350_326786C	h	-	h	a	a	a	a	a	-	a	-	h	h	h	a	a	a	h	a	-	-	a	h	h	a	a	a	h	a	a	a	a	h	h	a	h	h	h	-	h	a	h	a	a	a	a	a	h	h
*scaffold350_439101C	h	h	h	a	h	a	a	a	h	h	h	h	h	a	-	h	a	-	h	h	a	h	a	h	a	a	a	h	a	a	a	h	h	a	a	a	h	h	h	h	a	a	a	h	h	h	a	h	a
*scaffold353_83930C	h	a	a	a	-	a	a	a	a	-	a	h	-	h	a	a	-	a	h	-	h	a	h	h	a	a	a	h	a	a	h	h	h	a	a	h	h	a	-	a	a	h	a	a	a	a	a	h	a
*scaffold353_84044	h	a	a	-	h	a	a	a	a	h	a	h	h	h	a	a	h	-	-	h	h	-	h	h	a	a	a	h	a	a	h	h	h	a	a	h	h	a	h	a	a	h	a	a	a	a	a	h	a
*scaffold356_239747	a	h	a	a	h	a	h	a	h	h	h	a	a	a	-	a	a	a	a	h	h	-	a	h	a	h	h	h	a	a	a	a	a	a	h	h	a	h	h	a	h	a	a	a	h	a	h	h	a
*scaffold356_302805	a	h	a	-	h	a	h	a	h	h	h	a	a	a	-	a	a	a	a	h	h	-	a	h	a	h	h	h	a	a	a	a	a	a	h	h	a	h	h	a	h	a	a	a	h	a	h	h	a
*scaffold36_1122150	a	h	h	h	h	h	h	h	a	a	a	a	a	h	h	a	h	-	a	-	a	h	h	a	a	a	h	a	h	h	-	a	a	a	h	a	a	h	-	h	a	a	h	h	a	h	h	h	a
*scaffold36_1128010C	a	h	h	-	-	h	h	h	a	a	a	a	a	-	h	a	h	a	a	a	a	-	h	a	a	a	h	a	h	h	a	a	a	a	h	a	a	-	a	h	a	a	h	h	a	h	h	h	a
*scaffold36_1180794C	a	h	h	h	h	h	h	h	a	a	a	a	-	h	h	a	h	a	a	a	a	h	h	a	a	a	h	a	h	h	a	a	a	a	h	a	a	h	a	h	a	a	h	h	a	h	h	h	a
*scaffold36_1208466	a	h	h	h	h	h	h	h	a	a	a	a	a	h	h	a	h	a	a	a	a	h	h	a	a	a	h	a	h	h	a	a	a	a	h	a	a	h	a	h	a	a	h	h	a	h	h	h	a
*scaffold36_1251519	a	h	a	h	h	h	h	h	a	-	a	a	a	h	h	a	h	a	a	-	a	h	h	a	a	a	h	a	h	h	a	a	a	a	h	a	a	h	a	h	a	a	h	h	a	h	h	h	a
*scaffold36_1251596C	a	h	a	-	h	h	h	h	a	a	a	a	a	h	h	a	h	a	a	a	a	-	h	a	a	a	h	a	h	h	a	a	a	a	h	a	a	-	a	h	a	a	h	h	a	h	h	h	a
*scaffold36_1406305	-	h	a	h	h	h	h	h	a	a	a	a	a	h	h	a	h	a	a	-	a	h	h	a	-	a	h	a	h	h	-	a	a	a	h	a	a	h	a	h	a	-	h	h	a	h	h	h	a
*scaffold36_1406330	-	h	a	h	h	h	h	h	a	a	a	a	a	h	h	a	h	a	a	-	a	h	h	a	-	a	h	a	h	h	-	a	a	a	h	a	a	h	a	h	a	-	h	h	a	h	h	h	a
*scaffold36_1421454C	a	h	a	h	h	h	h	h	a	a	a	a	a	h	h	a	h	a	a	a	a	h	h	a	a	a	h	a	h	h	a	a	a	a	h	a	a	h	a	h	a	a	h	h	a	h	h	h	a
*scaffold36_1421577	a	h	a	h	h	h	h	h	a	a	a	a	a	h	h	a	h	a	a	-	a	h	h	a	a	a	h	a	h	h	a	a	a	a	h	a	a	h	a	h	a	a	h	h	a	h	h	h	a
*scaffold36_1479792	a	h	a	h	h	h	h	-	a	a	a	a	a	h	h	a	h	a	a	-	a	h	h	a	a	a	h	a	h	h	a	a	a	a	h	a	a	h	a	h	a	a	h	-	a	h	h	h	a
*scaffold36_250381C	a	h	h	-	h	h	h	-	a	a	a	a	a	h	-	a	h	a	a	a	h	h	h	a	a	a	h	a	a	-	a	a	a	a	-	a	a	-	a	h	-	a	h	h	a	a	h	h	a
*scaffold36_434982	a	h	h	h	h	h	h	h	a	a	a	a	a	h	h	a	h	a	a	-	h	h	h	a	a	a	h	a	h	h	-	a	a	a	h	a	a	h	a	h	a	a	h	h	a	a	h	h	a
*scaffold36_950721	a	h	h	h	h	h	h	h	a	a	a	a	a	h	h	a	h	a	-	-	a	h	h	a	a	a	h	a	h	h	a	a	a	a	h	a	a	h	a	h	a	a	h	h	a	h	h	h	a
*scaffold360_276792C	a	-	a	-	a	a	a	a	h	h	-	a	a	h	h	a	a	a	h	a	h	-	a	h	a	a	a	h	h	a	a	a	a	a	a	a	h	a	a	a	h	a	h	h	-	h	-	h	h
*scaffold362_357503	a	h	h	h	h	a	a	h	h	a	h	a	a	h	h	a	a	a	a	-	h	-	h	a	a	a	h	h	h	a	h	a	h	h	a	-	a	h	h	a	a	a	h	a	a	h	a	h	h
*scaffold362_80133	h	a	a	-	h	a	a	a	a	h	h	a	a	h	-	a	h	a	h	h	h	a	h	h	a	a	a	a	a	a	h	a	h	a	a	h	h	-	h	a	a	h	-	a	a	a	a	h	a
*scaffold362_80135C	h	a	-	a	h	a	a	a	a	h	h	a	a	h	a	a	h	a	h	h	h	a	h	h	a	a	a	a	a	a	-	a	h	a	a	h	h	a	h	a	a	h	a	a	a	a	a	h	a
*scaffold365_183415C	h	a	a	-	a	a	a	-	h	a	a	a	a	-	h	h	h	h	h	-	a	a	h	a	h	a	h	h	a	a	-	a	a	h	a	a	h	a	h	h	a	a	a	h	h	a	h	h	a
*scaffold365_323786	h	a	a	h	a	a	h	h	h	a	a	a	a	h	h	h	h	h	h	h	a	-	h	a	h	a	h	h	a	a	h	a	a	h	a	a	h	-	h	h	a	a	a	h	h	a	h	h	a
*scaffold365_323792C	h	a	a	-	a	a	h	h	h	a	a	a	a	h	h	h	h	h	h	-	a	a	h	a	h	a	h	h	a	a	-	a	a	h	a	a	h	-	-	h	a	a	a	h	h	a	h	h	a
*scaffold365_47876C	h	a	a	-	a	a	a	h	h	a	a	a	a	h	h	h	h	-	h	-	a	a	h	a	h	a	h	h	a	a	h	a	a	h	a	a	h	a	h	h	a	a	a	h	h	a	h	h	a
*scaffold37_1109408	h	a	-	-	h	h	a	a	a	h	h	-	-	-	h	a	h	h	h	h	h	h	a	h	h	a	a	a	h	h	h	a	a	a	h	a	h	h	h	a	h	a	h	h	h	a	a	a	h
*scaffold37_1198514	h	a	a	a	h	h	a	a	a	h	h	-	a	a	h	a	h	h	h	h	h	h	a	h	h	a	a	a	h	h	h	a	a	a	h	a	h	h	h	a	h	a	h	h	h	a	a	a	h
*scaffold37_1254751	h	a	-	-	h	h	a	a	a	h	-	a	a	a	h	a	-	h	h	h	h	h	a	h	-	a	a	a	-	h	h	a	a	a	h	a	-	h	h	a	h	a	h	h	h	a	a	a	h
*scaffold37_1262746	h	a	a	-	h	h	a	a	a	h	h	a	a	a	h	a	h	h	h	h	h	h	a	h	h	a	a	a	h	h	h	a	a	a	h	a	h	h	h	a	h	a	h	h	h	a	a	a	h
*scaffold37_1353662C	a	a	h	a	h	a	h	a	h	h	a	h	h	a	h	a	a	a	a	a	h	a	h	a	a	a	h	h	h	h	h	h	h	h	h	h	a	a	h	a	a	a	h	h	a	h	a	a	h
*scaffold37_1383884C	h	a	a	a	h	h	a	a	a	-	h	a	a	a	-	a	-	-	h	-	h	-	a	h	h	a	h	a	h	h	-	a	a	a	h	a	h	-	h	a	h	-	h	h	h	a	a	a	h
*scaffold37_1384665	h	a	-	-	h	h	a	a	a	h	h	a	a	-	h	a	h	h	h	h	h	h	a	h	h	a	h	a	h	h	h	a	a	a	h	a	h	h	h	a	h	h	h	h	h	a	a	a	h
*scaffold37_1639104C	h	a	a	a	h	h	a	a	a	h	h	a	a	a	h	a	h	h	h	-	h	h	a	h	h	a	h	a	h	h	h	a	a	a	h	a	h	h	a	a	a	h	h	h	h	a	a	a	h
*scaffold37_1714694	h	a	-	-	h	h	a	a	a	h	h	a	-	a	h	a	h	h	h	h	h	h	a	h	h	a	h	a	h	h	h	a	a	a	h	a	h	h	a	a	a	h	h	h	h	a	a	a	h
*scaffold37_1714865	h	a	-	-	h	h	a	a	a	h	h	a	-	a	h	a	h	h	h	h	h	h	a	h	h	a	h	a	h	h	h	a	a	a	h	a	h	h	a	a	a	h	h	-	h	a	a	a	h
*scaffold37_1722981C	h	a	a	a	h	h	a	a	a	h	h	a	a	a	h	a	-	h	h	-	h	h	a	h	h	a	h	a	h	h	-	a	a	a	h	a	h	-	a	a	a	h	h	h	h	a	a	a	h
*scaffold37_288654C	h	a	a	a	h	h	a	a	a	h	h	a	a	-	h	a	h	h	h	-	h	-	a	h	h	a	a	a	h	h	h	a	a	h	h	a	h	h	h	a	h	a	h	h	h	a	a	a	h
*scaffold37_352207	h	a	a	-	h	h	a	a	a	h	h	a	a	h	h	a	h	h	h	h	h	h	a	h	h	a	a	a	h	h	h	a	a	h	h	a	h	h	h	a	h	a	h	h	h	a	a	a	h
*scaffold37_352307	h	a	a	-	h	h	a	a	a	h	h	a	a	h	h	a	h	h	h	h	h	h	a	h	h	a	a	a	h	h	h	a	a	h	h	a	h	h	h	a	h	a	h	h	h	a	a	a	h
*scaffold37_412493C	h	a	a	a	h	h	a	a	-	h	h	a	a	h	h	a	h	h	h	-	h	-	a	h	h	-	a	a	h	h	h	a	a	h	h	a	h	h	h	a	h	a	h	h	h	a	a	a	h
*scaffold37_504819C	h	a	a	a	h	h	a	a	a	h	h	a	a	h	h	a	h	h	h	h	h	h	a	h	h	a	a	-	h	h	h	a	-	h	h	a	h	h	h	a	h	a	h	h	h	a	a	a	h
*scaffold37_63941	h	a	-	-	h	h	h	a	a	h	h	a	-	h	h	a	h	h	h	h	h	h	-	h	h	a	a	a	h	h	h	a	-	h	h	-	h	h	h	-	h	a	h	h	h	a	a	a	h
*scaffold37_65884C	h	-	a	a	h	h	h	a	a	h	h	a	a	h	h	a	h	h	h	a	h	-	a	h	h	a	a	a	h	h	-	-	a	h	-	a	h	h	-	a	h	a	h	h	h	a	a	a	h
*scaffold37_65987	h	a	a	-	h	h	h	a	a	-	h	a	a	h	h	a	h	h	h	h	h	h	a	h	h	a	a	a	h	h	h	-	a	-	h	-	h	h	h	a	h	a	h	h	h	a	a	a	h
*scaffold37_680170C	h	a	a	a	h	h	a	a	a	h	h	a	a	a	h	a	h	h	h	a	h	-	a	h	h	a	a	a	h	h	-	a	a	h	h	a	h	h	h	a	h	a	h	h	h	a	a	a	h
*scaffold37_680285	h	a	a	a	h	h	a	a	a	h	h	a	a	a	h	a	h	h	h	h	h	h	a	h	h	a	a	a	h	h	h	a	a	h	h	a	h	h	h	a	h	a	h	h	h	a	a	a	h
*scaffold37_681324C	h	a	a	a	h	h	a	a	a	h	h	a	a	a	h	-	h	h	h	-	h	h	a	h	h	a	a	a	h	h	-	a	a	h	h	a	h	h	h	a	h	a	h	h	h	a	a	a	h
*scaffold37_682262C	h	a	a	a	-	h	a	a	a	-	h	a	a	a	-	a	-	-	h	-	h	-	a	h	h	a	a	a	h	h	h	a	a	h	h	a	h	-	h	a	h	a	h	h	h	a	a	a	h
*scaffold37_764227	h	a	a	-	h	h	-	-	a	h	h	a	a	a	h	a	h	h	h	h	h	h	a	h	h	a	a	a	h	h	h	a	a	h	h	a	h	h	h	a	h	a	h	h	h	a	a	a	h
*scaffold37_792785C	h	a	a	a	h	h	a	a	a	h	h	a	a	a	h	a	h	h	h	-	h	-	a	h	h	a	a	a	h	h	-	a	a	h	h	a	h	-	h	a	h	a	h	h	h	a	a	a	h
*scaffold37_799448C	h	a	a	a	h	h	a	a	a	-	h	a	a	a	h	a	h	h	h	-	h	h	a	h	h	a	a	a	h	h	-	a	a	h	h	a	h	h	h	a	h	a	h	h	h	a	a	a	h
*scaffold37_898392	h	a	-	-	h	h	a	a	a	h	h	a	-	-	h	a	h	h	h	h	h	h	-	h	h	a	a	a	h	h	h	a	a	h	h	a	h	h	h	a	h	-	h	h	h	a	-	a	h
*scaffold37_934211	h	a	-	-	h	h	a	a	a	h	h	a	a	-	h	a	h	h	h	h	h	h	a	h	h	a	a	a	h	h	h	a	a	h	h	a	h	h	h	a	h	a	h	h	-	a	a	a	h
*scaffold37_960044	h	a	-	-	h	h	a	a	a	h	h	a	-	a	h	a	h	h	h	h	h	h	a	h	a	a	a	a	h	h	h	a	a	h	h	-	h	h	h	a	h	a	h	h	h	a	a	a	h
*scaffold370_18039	a	h	h	h	h	a	h	a	a	a	h	a	a	h	h	a	a	-	h	-	h	h	h	a	a	a	a	h	a	a	a	a	a	a	h	a	h	h	a	a	-	a	h	h	a	a	h	h	h
*scaffold371_326206C	a	h	a	a	a	h	h	a	h	h	-	a	a	a	a	a	a	a	a	-	h	a	h	h	h	h	h	h	a	a	a	a	a	a	h	h	a	a	-	a	h	a	-	a	h	a	h	h	a
*scaffold371_326308C	a	h	a	a	a	h	h	a	h	h	-	a	a	a	a	a	a	a	a	-	h	a	h	h	h	h	h	h	a	a	a	a	a	a	h	h	a	a	-	a	h	a	a	a	h	a	h	h	a
*scaffold371_59663C	a	h	a	a	a	h	h	a	h	h	h	a	a	a	a	a	a	a	a	-	h	a	h	h	h	h	h	h	a	a	a	a	-	a	-	h	a	a	h	a	h	a	a	-	h	a	-	h	a
*scaffold371_59795	a	h	a	-	a	h	h	a	h	h	h	a	a	a	a	a	a	a	a	h	h	-	h	h	h	h	h	h	a	a	-	a	a	a	h	h	a	-	h	a	h	a	a	a	h	a	h	h	a
*scaffold371_70870C	a	h	a	a	a	h	h	a	h	-	-	a	a	a	a	a	a	a	a	-	h	a	h	h	h	h	h	h	a	a	a	a	a	a	h	h	a	a	-	a	-	a	a	a	-	a	h	h	a
*scaffold372_369696	a	a	-	-	a	a	h	a	a	a	a	a	-	a	h	a	a	a	a	a	h	a	h	h	a	a	h	a	a	h	a	h	a	a	h	a	a	h	a	h	h	a	a	a	h	h	h	a	a
*scaffold374_220950	h	-	h	h	h	h	a	h	a	a	-	h	h	-	h	a	-	h	h	-	h	-	h	h	a	h	-	a	a	h	-	a	h	h	h	a	h	h	h	a	h	a	a	a	h	a	h	h	a
*scaffold374_280700	h	-	h	h	h	h	a	h	a	a	a	h	h	-	h	a	h	h	h	-	h	-	h	h	a	h	a	a	a	h	a	a	h	h	h	a	h	h	h	a	h	a	a	a	h	a	h	h	a
*scaffold374_287116	h	a	h	h	h	h	a	h	a	a	a	h	h	a	h	a	h	h	h	-	h	-	h	h	a	h	a	a	a	h	-	a	h	h	h	a	h	h	h	a	h	-	a	a	h	a	h	h	a
*scaffold375_173360C	h	h	a	a	a	a	h	a	h	h	a	a	a	h	h	h	h	a	h	a	a	h	a	h	a	a	a	a	h	h	h	a	h	h	h	a	h	h	h	h	h	a	a	h	a	a	h	a	h
*scaffold375_18571C	h	h	a	a	a	a	h	a	h	h	a	a	a	h	-	h	h	a	-	a	a	-	a	h	a	a	a	a	h	h	-	a	h	h	h	a	h	h	h	h	h	a	a	h	a	a	h	a	h
*scaffold376_109458	h	h	-	h	a	h	h	a	a	h	h	a	a	a	a	h	h	-	a	-	a	h	h	h	a	a	h	a	h	a	h	-	a	h	a	a	a	h	a	h	a	a	a	a	a	a	a	a	h
*scaffold376_232794	h	h	-	h	-	h	h	-	a	h	h	a	a	-	-	h	h	-	a	h	a	h	h	h	a	a	h	a	h	a	h	a	a	h	a	a	a	h	-	h	a	a	a	a	a	a	a	a	h
*scaffold379_101845C	a	h	h	-	h	h	h	a	a	a	a	a	a	-	-	a	h	a	a	a	h	-	h	a	a	a	h	h	a	a	a	a	a	a	h	a	a	-	a	h	h	a	h	h	a	a	-	h	a
*scaffold379_110254	a	h	h	h	h	h	h	a	a	a	a	a	a	h	h	a	h	a	-	-	h	h	h	a	a	a	h	h	a	a	a	h	a	a	h	a	a	h	a	h	h	a	h	h	a	a	h	h	a
*scaffold379_160923	a	h	h	h	-	h	h	a	a	a	a	a	a	h	h	a	-	a	-	h	h	h	h	a	a	a	h	-	a	a	-	-	a	a	h	a	a	h	a	h	h	a	h	h	a	a	h	h	a
*scaffold379_219770	a	h	-	h	h	h	h	a	a	a	a	a	a	h	h	a	-	a	a	a	h	h	h	a	a	a	h	-	a	a	a	a	a	a	-	a	a	h	a	h	h	a	h	h	a	a	h	-	a
*scaffold379_219771	a	h	-	h	h	h	h	a	a	a	a	a	a	h	h	a	-	a	a	a	h	h	h	a	a	a	h	-	a	a	a	a	a	a	-	a	a	h	a	h	h	a	h	h	a	a	h	-	a
*scaffold379_219786C	a	h	h	h	h	h	h	a	a	a	a	a	a	h	h	a	h	a	a	a	h	h	h	a	a	a	h	h	a	a	a	a	a	a	h	a	a	h	a	h	h	a	h	h	a	a	h	h	a
*scaffold379_219867	a	h	h	h	h	h	-	a	a	a	a	a	a	h	h	a	h	a	a	-	h	h	h	a	a	a	h	h	a	a	a	a	a	a	h	a	a	h	a	h	h	a	h	h	a	a	h	h	a
*scaffold379_219890	a	h	h	h	h	h	h	a	a	a	a	a	a	h	h	a	h	a	a	a	h	h	h	a	a	a	h	h	a	a	a	a	a	a	h	a	a	h	a	h	h	a	h	h	a	a	h	h	a
*scaffold379_221234C	a	h	h	-	h	h	h	a	a	a	a	a	a	-	-	a	h	a	a	a	h	-	h	a	a	a	h	h	a	a	a	a	a	a	h	a	a	-	a	h	h	a	h	h	a	a	h	h	a
*scaffold379_221249C	a	h	h	h	h	h	h	a	a	a	a	a	a	-	-	a	h	a	a	a	h	-	h	a	a	a	h	h	a	a	a	a	a	a	h	a	a	h	a	h	h	a	h	h	a	a	h	h	a
*scaffold379_243830	a	h	h	h	h	h	h	a	a	-	a	a	a	h	h	a	h	a	a	-	h	h	h	a	a	a	h	h	a	a	-	a	a	a	h	a	a	h	a	h	h	a	-	-	a	a	h	h	a
*scaffold379_246418C	a	h	-	-	-	h	h	a	a	a	a	a	a	h	h	a	-	a	a	a	h	-	h	a	a	a	h	h	a	a	a	a	a	a	h	a	a	-	a	h	h	a	h	h	a	a	h	h	a
*scaffold379_277859C	a	h	h	-	-	h	h	a	a	a	a	a	a	h	h	a	h	a	a	a	h	-	h	-	a	a	h	h	a	a	a	a	a	a	h	a	a	-	a	h	h	a	h	h	a	a	h	h	a
*scaffold379_384392C	a	h	h	-	h	h	h	a	a	a	a	-	a	h	h	a	h	a	a	a	h	-	h	a	a	a	h	h	a	a	a	-	a	a	h	a	a	h	a	h	h	a	h	h	a	a	h	h	a
*scaffold379_384414	a	h	h	h	h	h	h	a	a	a	a	a	a	h	h	a	h	a	-	-	h	h	h	a	a	a	h	h	a	-	-	-	a	a	h	a	a	h	-	h	h	a	h	h	a	a	h	h	a
*scaffold379_92995C	a	h	-	-	h	h	h	a	a	a	a	a	a	-	h	a	-	a	a	a	h	-	h	a	a	a	h	h	a	a	a	a	a	a	h	a	a	h	a	h	h	a	h	h	a	a	h	h	a
*scaffold38_505346C	h	h	a	a	a	a	h	h	h	a	a	a	a	a	h	h	h	a	h	-	h	a	-	h	h	a	h	h	h	a	-	a	a	a	a	a	h	a	h	h	-	a	a	h	h	h	h	a	a
*scaffold38_505355C	h	h	a	a	a	a	h	h	h	a	a	a	a	a	h	h	h	a	h	-	h	a	-	h	h	a	h	h	h	a	-	a	a	a	a	a	h	a	h	h	-	a	a	h	h	h	h	a	a
*scaffold382_154259C	h	h	a	a	a	a	h	-	h	h	a	a	a	-	-	-	-	a	h	a	a	-	a	a	a	a	a	a	h	h	-	a	h	h	h	a	h	h	h	h	h	a	a	h	a	a	h	a	h
*scaffold382_331943	h	h	a	a	h	a	h	a	h	h	a	a	a	h	h	h	h	a	h	-	a	h	a	h	h	a	a	a	h	h	h	-	h	h	h	-	h	h	h	h	h	a	a	h	a	a	h	-	h
*scaffold384_328496C	a	a	a	h	a	a	h	a	h	h	a	h	h	a	a	a	-	a	a	-	a	-	a	h	h	h	a	a	h	h	a	a	h	a	a	a	a	-	h	a	a	a	a	a	a	a	a	h	h
*scaffold387_335564	a	h	h	h	h	a	-	a	a	h	a	h	h	a	h	h	h	h	a	-	h	h	a	a	h	h	h	a	a	a	h	a	a	a	a	a	a	-	h	h	a	a	a	h	a	h	h	h	a
*scaffold387_335566	-	h	h	h	h	a	-	a	a	h	a	h	h	a	h	h	h	h	a	-	h	h	a	a	h	h	h	a	a	a	h	a	a	a	a	a	a	-	h	h	a	a	a	h	a	h	h	h	a
*scaffold388_153074	h	h	a	a	a	a	h	h	h	a	a	a	a	h	h	h	h	h	h	h	h	-	h	a	h	a	h	h	h	a	h	a	-	a	a	a	h	-	h	h	a	a	a	h	h	h	h	h	a
*scaffold388_153129	h	h	a	a	a	a	h	h	h	a	a	a	a	h	h	h	h	h	h	h	h	-	h	a	h	a	h	h	h	a	h	a	a	a	a	a	h	-	h	h	a	a	a	h	h	h	h	h	a
*scaffold388_153133	h	h	a	a	a	a	h	h	h	a	a	-	a	h	h	h	h	h	h	h	h	-	h	a	h	a	h	h	h	a	h	a	a	a	a	a	h	-	h	h	a	a	a	h	h	h	h	h	a
*scaffold390_343558	a	-	h	h	h	h	a	a	a	h	a	h	h	h	a	h	h	-	a	h	h	-	a	a	a	h	a	a	a	h	-	h	a	a	a	a	a	h	h	a	h	a	h	-	h	h	a	a	a
*scaffold390_77305	a	h	h	h	h	h	a	a	a	h	a	h	h	h	a	h	h	a	a	h	h	a	a	a	-	h	-	a	a	h	-	-	a	a	a	a	a	h	h	a	h	-	-	h	h	h	a	a	a
*scaffold394_276304	h	a	h	-	h	a	a	a	h	h	a	a	a	a	h	a	a	a	a	h	h	-	a	a	a	a	h	-	h	h	h	h	a	h	h	h	a	a	h	a	a	h	h	h	h	h	a	h	h
*scaffold394_327852	h	a	h	-	h	a	a	a	h	h	a	a	-	a	h	a	-	a	a	-	h	-	a	a	a	a	h	h	h	h	h	h	a	h	h	h	a	-	h	a	a	h	h	h	h	h	a	h	h
*scaffold394_327971	h	a	h	-	h	a	a	a	h	h	a	a	-	a	h	a	-	a	a	-	h	-	a	a	a	a	h	h	h	h	h	h	a	h	h	h	a	-	h	a	a	h	h	h	h	h	a	h	h
*scaffold395_171291C	h	a	h	-	h	h	a	h	h	a	a	h	h	a	h	a	h	-	h	a	h	a	h	h	a	a	h	a	a	-	a	a	h	a	h	a	h	a	-	a	h	a	a	a	h	a	h	h	a
*scaffold395_196326	h	a	h	h	h	h	a	h	h	a	a	h	h	-	h	a	h	h	h	h	h	-	h	h	a	a	h	a	a	h	-	a	h	a	h	a	h	-	h	a	h	a	a	a	h	a	h	a	a
*scaffold395_272413	h	a	h	h	h	h	a	h	h	-	a	h	h	a	h	a	h	h	h	-	h	a	h	h	a	a	h	a	a	h	-	a	h	a	h	a	h	-	h	a	h	a	a	a	h	a	h	h	a
*scaffold395_303445	h	a	h	h	h	h	a	h	h	a	-	h	h	a	h	a	h	h	h	-	h	a	h	h	a	a	h	a	a	h	a	a	h	a	h	a	h	a	h	a	h	-	a	a	h	a	h	h	a
*scaffold398_261851	a	h	-	h	h	h	a	a	a	h	h	h	h	h	-	h	h	-	h	h	a	-	a	a	a	h	a	a	a	h	a	h	-	a	a	a	h	h	h	a	a	a	h	h	h	h	a	a	a
*scaffold399_180623	h	a	-	h	-	h	a	h	a	h	h	a	-	a	a	a	h	h	h	-	a	-	h	a	a	a	h	a	h	a	-	a	a	a	h	a	h	a	-	h	a	h	h	a	a	h	h	h	a
*scaffold399_180718	h	a	-	h	a	h	a	h	a	h	h	a	a	-	-	a	h	h	h	-	a	a	h	a	a	a	h	a	h	-	a	a	a	a	h	-	h	a	a	h	a	h	h	a	a	h	h	h	a
*scaffold399_273312C	h	a	a	-	a	h	a	h	a	h	h	a	a	a	a	a	h	h	-	a	a	a	h	a	a	a	h	a	h	a	a	a	a	a	h	a	h	a	a	h	a	h	h	a	a	h	h	h	a
*scaffold4_1555477C	a	h	a	a	a	h	h	h	a	h	h	a	a	h	a	a	a	-	h	a	h	a	h	h	h	h	-	h	a	h	a	a	a	a	h	h	h	a	h	a	-	a	h	a	h	a	h	h	a
*scaffold4_1555611C	a	h	a	a	a	h	h	-	a	-	h	a	a	-	a	a	a	-	h	a	h	a	h	h	h	h	h	h	a	h	a	a	a	a	h	h	h	a	h	a	h	a	h	a	h	a	h	h	a
*scaffold4_1619153C	a	h	a	a	a	h	h	h	a	h	h	a	a	h	a	a	a	h	h	a	h	a	h	h	h	h	h	h	a	h	a	a	a	a	h	-	h	a	h	a	h	a	h	a	h	a	h	h	a
*scaffold4_2067170	a	h	a	a	-	h	h	h	a	-	-	a	a	h	a	a	a	h	h	h	h	-	h	h	h	h	h	-	a	h	a	a	a	a	h	h	h	a	h	a	h	a	h	a	h	a	h	h	a
*scaffold4_2185766C	a	h	-	a	a	h	h	h	a	h	h	a	a	a	a	a	a	h	h	-	h	a	h	h	h	h	h	h	-	h	a	a	a	-	h	h	h	a	h	a	h	a	h	a	h	a	h	h	a
*scaffold4_2238311	a	h	a	-	a	h	h	h	a	h	h	a	a	a	a	a	a	h	h	h	h	-	h	h	h	h	h	h	a	h	-	a	a	a	h	h	h	a	h	a	h	a	h	a	h	a	h	h	a
*scaffold4_2300508C	a	h	a	a	a	h	h	h	a	h	h	a	a	a	a	a	a	h	h	-	h	a	h	h	h	h	-	h	a	h	a	a	a	a	h	h	h	a	h	a	h	a	h	a	h	a	h	h	a
*scaffold4_242664C	a	a	a	a	a	h	h	h	a	a	h	a	a	h	a	a	a	h	h	a	h	a	h	h	h	h	h	h	a	h	a	a	a	a	-	h	-	a	h	a	h	a	h	a	h	a	h	h	a
*scaffold4_242669	a	a	a	a	a	h	h	h	a	a	h	a	a	h	a	a	a	h	h	-	h	a	h	h	h	h	h	h	a	h	a	a	-	a	-	-	a	a	-	a	h	a	h	a	h	a	h	-	a
*scaffold4_2523968	a	h	a	-	-	h	h	h	a	h	h	a	a	a	a	a	a	h	h	-	h	a	h	h	h	h	h	h	a	h	a	a	a	a	h	h	h	a	h	a	h	-	h	a	h	a	h	h	a
*scaffold4_2524127	h	h	-	h	-	a	a	h	a	a	a	a	a	a	a	a	h	-	a	h	h	a	a	h	h	a	a	h	a	h	-	h	h	a	a	a	a	h	h	h	h	a	h	a	a	h	a	a	h
*scaffold4_2524800	h	a	a	h	a	a	h	h	a	-	h	a	a	a	a	a	h	h	h	a	a	-	h	h	h	h	h	a	h	h	a	h	a	h	h	a	h	-	-	h	a	h	h	h	a	a	h	h	a
*scaffold4_2600162	a	h	a	a	a	h	h	h	a	h	h	a	a	a	a	a	a	h	h	h	h	a	h	h	h	h	h	h	a	h	a	a	a	a	h	h	h	a	h	a	h	a	h	a	h	a	h	h	a
*scaffold4_2731146	a	h	a	a	a	h	h	h	a	h	h	a	a	a	a	a	a	h	h	h	h	a	h	h	h	h	h	h	a	h	a	a	a	a	h	h	h	-	h	a	-	a	h	a	h	a	h	h	a
*scaffold4_2731155C	a	h	a	a	a	h	h	h	a	-	h	a	a	a	a	a	a	h	h	-	h	a	h	h	h	h	h	h	a	h	a	a	a	a	h	h	h	a	h	a	h	a	h	a	h	a	h	h	a
*scaffold4_2988253	a	h	-	-	a	h	h	a	a	h	h	a	a	a	a	a	-	h	h	h	h	-	h	h	h	h	h	h	a	h	a	a	a	a	h	h	h	-	h	a	h	a	a	a	h	a	h	h	a
*scaffold4_3163230C	a	h	a	a	a	h	h	a	h	h	h	a	a	a	a	a	a	-	h	-	h	a	h	h	h	h	h	h	a	a	a	a	a	a	h	h	h	a	h	a	h	a	a	a	h	a	h	h	a
*scaffold4_3211586C	a	h	a	a	a	h	h	a	h	h	h	a	a	a	a	a	a	h	h	-	h	a	h	h	h	h	h	h	a	a	a	a	a	a	h	h	h	a	h	a	h	a	a	a	h	a	h	h	a
*scaffold4_3706588C	a	h	-	a	a	h	h	a	h	h	h	a	a	a	a	a	a	h	h	-	h	a	h	h	h	h	h	h	a	a	a	a	a	a	h	h	h	a	h	a	h	a	a	a	h	a	h	h	a
*scaffold4_3766061C	a	h	a	a	a	h	h	a	h	h	h	a	a	a	a	a	a	h	h	-	h	a	h	h	h	h	h	h	a	a	a	a	a	a	h	h	h	a	h	a	h	a	a	a	h	a	-	h	a
*scaffold4_3827477	a	h	a	-	a	h	h	a	h	h	h	a	a	a	a	a	a	h	a	h	h	a	h	h	h	h	h	h	a	a	-	a	a	a	h	h	a	a	h	a	h	a	a	a	h	a	h	h	a
*scaffold4_4280637	a	h	a	a	a	h	h	a	h	h	h	a	a	a	a	a	a	h	a	h	h	a	h	h	h	h	h	h	a	a	a	a	a	a	h	h	a	a	h	a	h	a	a	a	h	a	h	h	a
*scaffold4_751446C	a	a	a	a	a	h	h	h	a	a	h	a	a	h	a	a	a	h	h	a	h	a	h	h	h	h	h	h	a	h	a	a	a	a	-	-	h	a	h	a	h	a	h	a	h	a	h	h	a
*scaffold4_751645C	a	a	a	a	a	h	h	h	a	a	h	a	a	h	a	a	a	h	h	a	h	a	-	h	h	h	h	h	a	h	a	a	a	a	-	-	h	a	-	a	h	a	h	a	h	a	h	h	a
*scaffold4_785082C	a	a	a	a	a	h	h	h	a	a	h	a	a	-	a	a	a	h	h	a	h	a	h	h	h	h	h	h	a	h	a	a	a	a	h	h	h	a	h	a	h	a	h	a	h	a	h	h	a
*scaffold4_836456C	a	a	a	a	a	h	h	h	a	a	h	a	a	h	a	a	a	h	h	a	h	a	h	h	h	h	h	h	a	h	a	a	a	a	h	h	h	a	-	a	h	a	h	a	h	a	h	h	a
*scaffold4_908496C	a	h	a	a	a	h	h	h	a	a	h	a	a	-	a	a	a	-	h	a	h	a	h	h	h	h	h	h	a	h	a	a	a	a	h	h	h	a	h	a	h	a	h	a	h	a	h	h	a
*scaffold40_1099316C	a	a	a	h	a	a	h	a	a	a	h	a	a	h	h	h	h	a	h	-	a	a	a	h	h	h	h	h	a	a	a	a	h	a	h	h	h	a	-	a	a	a	h	a	h	h	a	a	a
*scaffold40_231644C	a	a	a	-	a	a	h	a	a	a	h	a	a	h	-	h	-	a	h	a	a	a	a	h	h	h	h	h	a	a	a	a	h	a	h	h	h	a	h	a	a	a	h	a	h	h	a	a	a
*scaffold40_840421C	a	a	a	-	a	a	h	a	a	a	h	a	a	h	h	h	-	a	h	-	a	a	a	h	h	h	h	h	a	a	a	a	h	a	h	-	h	a	h	a	a	a	h	a	h	h	a	a	a
*scaffold404_111915C	a	h	h	a	h	h	h	a	a	-	h	a	a	h	a	-	a	-	a	-	a	-	h	a	a	a	a	a	a	h	a	a	h	a	h	a	a	-	a	a	h	h	h	h	a	h	h	a	h
*scaffold404_111919	h	h	h	h	-	-	a	h	a	h	h	h	h	h	h	a	a	h	a	h	h	h	h	a	a	h	h	a	a	h	a	-	h	a	a	a	a	h	h	a	a	h	a	a	h	h	a	a	a
*scaffold404_111941C	a	h	h	a	h	h	h	a	a	-	h	a	a	h	a	-	a	-	a	-	a	-	h	a	a	a	a	a	a	h	a	a	h	a	h	a	a	-	a	a	h	h	h	h	a	h	h	a	h
*scaffold406_141148	a	h	-	h	h	h	h	h	a	a	a	a	a	h	h	a	h	a	a	-	a	h	h	a	a	a	h	a	h	h	a	a	a	a	h	-	a	a	a	h	a	a	h	h	a	h	h	h	a
*scaffold406_141840C	a	h	a	h	-	h	h	h	a	a	a	a	a	h	h	a	h	a	a	a	a	-	h	a	a	a	-	a	h	h	a	a	a	a	h	a	a	a	a	-	a	a	h	h	a	h	h	h	a
*scaffold406_141905	a	h	a	h	-	h	h	h	a	-	a	a	a	h	h	a	h	a	a	-	a	h	h	a	a	a	h	a	h	h	a	a	a	a	h	-	a	-	a	h	a	a	h	h	a	h	h	h	a
*scaffold406_141996	a	h	a	h	h	h	h	h	a	-	a	a	a	h	h	a	h	a	a	-	a	h	h	a	a	a	h	a	h	h	-	a	a	a	h	a	a	-	-	h	a	-	h	h	a	h	h	h	a
*scaffold406_186766	a	h	-	h	h	h	h	h	a	a	a	a	-	h	h	a	h	-	h	-	-	h	h	a	a	a	h	a	h	h	a	a	a	a	h	a	a	a	-	h	a	a	h	h	a	h	h	h	a
*scaffold406_309090C	a	-	a	-	-	h	h	h	a	a	a	a	a	-	-	a	-	a	a	a	a	-	h	a	a	a	h	a	h	h	a	a	a	a	h	a	a	a	a	h	a	a	h	h	a	h	h	h	a
*scaffold409_175584	h	a	a	-	h	h	a	a	a	h	h	a	-	a	h	a	h	h	h	h	h	h	a	h	h	a	h	a	h	h	h	-	a	a	h	a	h	h	a	a	a	h	h	h	h	a	a	a	h
*scaffold409_184603	h	a	a	-	h	h	a	a	a	h	h	a	a	a	h	a	h	h	h	h	h	h	a	h	h	a	h	a	h	h	h	a	a	a	h	a	h	h	a	a	a	h	h	h	h	a	a	a	h
*scaffold409_229311	h	a	a	-	h	h	a	a	a	h	h	a	a	a	h	a	h	h	h	h	h	h	a	h	h	a	h	a	h	h	h	a	a	a	h	a	h	h	a	a	a	h	h	h	h	a	a	a	h
*scaffold409_271645	h	a	-	-	h	h	a	-	a	h	h	a	-	-	h	a	h	h	h	h	h	h	a	h	h	a	h	a	h	h	h	a	a	a	h	-	h	h	a	a	a	h	h	h	h	a	a	a	h
*scaffold409_287400	h	a	a	-	h	h	a	a	a	h	h	a	a	a	h	a	h	h	h	h	h	h	a	h	h	a	h	a	h	h	h	a	a	a	h	-	h	h	a	a	a	h	h	h	h	a	a	a	h
*scaffold41_604634	a	h	h	h	a	a	a	a	a	h	a	h	h	h	h	h	h	h	a	a	a	h	a	h	h	h	h	a	h	a	h	h	a	a	a	a	a	h	a	h	a	h	a	h	a	a	h	h	a
*scaffold411_107673	h	h	h	-	h	a	a	-	a	h	h	h	h	h	-	a	-	-	a	h	h	h	h	a	h	a	h	h	h	h	h	a	h	h	h	a	a	-	h	a	h	h	h	h	a	h	h	a	h
*scaffold411_93546C	h	h	h	a	h	a	a	a	-	h	h	h	h	h	-	-	a	-	a	-	h	h	h	a	h	a	h	h	h	h	-	a	h	h	h	a	a	a	h	a	h	h	h	h	a	h	h	a	h
*scaffold412_257376	h	a	a	h	-	h	a	h	a	h	h	a	a	a	-	a	h	h	h	-	a	-	h	a	a	h	h	a	h	a	-	a	a	a	h	-	h	a	a	h	a	h	h	h	a	a	h	h	a
*scaffold412_81176	h	a	a	h	a	h	a	h	a	h	h	a	a	a	a	a	h	h	h	-	a	a	h	a	a	h	h	a	h	a	-	a	a	a	h	-	h	-	a	h	a	h	h	h	a	a	h	h	a
*scaffold412_9534	h	a	a	h	a	h	a	h	a	h	h	a	a	a	a	a	h	h	h	a	a	a	h	a	a	h	h	a	h	a	a	a	a	a	a	a	h	a	a	h	a	h	h	h	a	h	h	h	a
*scaffold413_40398C	a	h	h	-	-	a	h	a	a	a	h	a	a	h	h	a	a	a	h	a	h	h	h	a	a	a	h	h	a	a	a	a	a	a	h	a	h	h	a	a	h	a	h	h	a	a	h	h	h
*scaffold413_40405	a	h	h	h	h	a	h	a	a	a	h	a	a	h	-	a	a	a	h	-	h	h	h	a	a	a	h	h	a	a	a	a	a	a	h	a	h	h	a	a	h	a	h	h	a	a	h	h	h
*scaffold413_40411	a	h	-	h	h	a	h	-	a	-	-	a	a	h	h	a	a	-	h	h	-	h	h	a	a	a	h	h	a	a	a	a	a	a	h	a	h	-	a	a	h	a	h	h	a	a	h	-	h
*scaffold42_109003C	a	a	a	a	a	a	h	h	a	-	h	a	a	a	h	a	h	h	a	a	a	a	h	h	h	h	a	a	h	h	a	h	-	h	h	a	a	a	a	h	a	-	h	h	h	a	a	h	a
*scaffold42_116865	a	a	a	a	a	a	h	h	a	h	h	a	a	a	h	a	h	h	a	-	a	-	h	h	h	h	a	a	h	h	a	h	h	h	h	a	a	a	a	h	a	h	h	h	h	a	a	h	a
*scaffold42_1632836	a	h	h	h	a	a	a	h	a	h	h	a	a	a	a	a	h	a	a	a	a	a	h	h	h	h	a	a	a	h	a	h	h	h	h	a	a	a	a	h	a	a	h	h	h	a	a	h	h
*scaffold42_1632862	a	h	h	h	a	a	a	h	a	h	h	a	a	a	a	a	h	a	a	a	a	a	h	h	h	h	a	a	a	h	a	h	h	h	h	a	a	a	a	h	a	a	h	h	h	a	a	h	h
*scaffold42_279451	a	a	a	a	a	a	h	h	a	h	h	a	a	a	h	a	h	h	a	-	a	-	h	h	h	h	a	a	h	h	-	h	h	h	h	a	a	a	a	h	a	h	h	h	h	a	a	h	a
*scaffold42_355839C	a	a	a	a	a	a	h	h	a	-	h	a	a	a	h	a	h	-	a	a	a	a	h	h	h	h	a	a	h	h	a	h	-	h	h	a	a	a	a	h	a	-	h	h	h	a	a	h	a
*scaffold42_379152C	a	a	a	a	a	a	h	-	a	h	h	a	a	a	-	a	-	-	a	a	a	a	-	h	h	h	a	a	h	h	a	h	h	h	h	a	a	a	a	h	a	h	h	h	h	a	a	h	h
*scaffold42_584828	a	h	-	h	h	h	a	h	a	h	h	a	-	a	h	h	a	h	a	-	h	a	a	a	a	a	h	a	h	h	a	a	a	h	a	h	a	a	h	h	a	h	a	a	a	h	h	a	h
*scaffold43_1342813	h	a	-	-	h	h	a	a	a	h	h	a	-	h	a	a	h	a	h	h	h	-	h	h	a	a	a	a	a	a	h	a	h	a	a	h	h	-	h	a	a	h	a	a	a	a	a	h	a
*scaffold43_1405310	h	a	a	a	h	h	a	a	a	h	h	a	a	h	a	a	h	a	h	h	h	-	h	h	a	a	a	a	a	a	h	a	h	a	a	h	h	a	h	a	a	h	a	a	a	a	a	h	a
*scaffold43_1503813	h	a	a	-	h	h	a	-	a	h	h	a	a	h	-	a	h	a	h	h	h	-	h	h	a	a	a	a	a	a	h	a	h	a	a	h	h	-	h	-	a	h	a	a	a	a	a	h	a
*scaffold43_1603574	h	a	a	a	h	h	a	a	a	h	h	a	a	h	a	a	h	a	h	h	h	-	h	h	a	a	a	a	a	a	h	a	h	a	a	h	h	-	h	a	a	h	a	a	a	a	a	h	a
*scaffold43_459677C	h	a	a	a	-	a	a	a	a	h	-	a	-	-	a	a	h	a	h	-	h	a	h	h	a	a	a	a	a	a	-	a	h	a	a	h	h	a	h	a	a	h	a	a	a	a	a	h	a
*scaffold431_53243	a	a	a	-	a	a	h	a	a	a	a	a	a	a	h	a	a	a	a	-	-	a	h	h	a	a	h	h	a	h	-	a	a	a	h	a	a	h	-	h	a	a	a	a	h	h	h	a	a
*scaffold432_122271	h	a	a	-	h	h	a	a	a	h	h	a	a	a	a	a	h	h	h	h	h	h	a	h	h	a	h	a	h	a	-	a	a	a	h	a	h	h	a	a	a	h	h	a	h	a	a	a	h
*scaffold432_122393	h	a	a	-	h	h	a	a	a	h	h	a	a	a	a	a	h	h	h	h	h	h	a	h	h	a	h	a	h	a	-	a	a	a	h	a	h	h	a	a	a	h	h	a	h	a	a	a	h
*scaffold432_126130	h	a	-	-	h	h	a	a	a	h	h	a	a	a	a	a	h	h	h	h	h	h	a	h	h	a	h	a	h	a	-	a	a	a	h	a	h	h	a	a	a	h	h	a	h	a	a	a	h
*scaffold438_148852	a	h	-	-	a	a	h	h	a	a	h	a	-	-	h	h	h	a	h	h	h	a	a	h	h	a	h	h	h	h	h	a	a	a	h	a	h	-	h	h	a	a	a	h	h	h	-	a	a
*scaffold438_151580	a	h	a	a	a	a	h	h	a	a	h	a	a	a	h	h	h	a	h	h	h	-	a	h	h	a	h	h	h	h	h	a	a	a	h	a	h	-	h	h	a	a	a	h	h	h	a	a	a
*scaffold439_21781C	a	h	a	a	h	h	h	a	a	h	a	a	a	h	a	a	a	a	-	-	a	h	h	a	a	-	-	a	a	h	-	a	h	a	-	a	a	h	a	a	h	h	h	h	-	h	h	a	h
*scaffold439_235437	a	h	a	-	h	h	-	a	a	h	a	-	a	h	a	a	a	-	a	h	a	h	h	a	a	a	a	a	a	h	-	a	h	a	h	a	a	h	-	a	h	h	h	h	a	h	h	a	h
*scaffold439_235438	a	h	a	-	h	h	-	a	a	h	a	a	a	h	a	a	a	a	a	h	a	h	h	a	a	a	a	a	a	h	-	a	h	a	h	a	a	h	a	a	h	h	h	h	a	h	h	a	h
*scaffold44_1094470	a	h	a	h	a	a	h	h	h	h	a	h	h	a	a	h	h	a	a	h	a	h	a	h	h	h	a	a	h	a	-	a	-	a	a	a	a	h	h	a	a	h	a	a	a	a	a	h	h
*scaffold44_1094615	a	h	a	h	a	a	h	h	h	h	a	h	h	a	a	h	h	a	a	h	a	h	a	h	h	h	a	a	h	a	-	a	h	a	a	a	a	h	h	a	a	h	a	a	a	a	a	h	h
*scaffold44_1095347	a	h	-	h	a	a	h	h	h	h	a	h	h	a	a	h	h	-	h	-	a	h	a	h	h	h	a	a	h	-	-	a	h	a	a	a	a	h	h	a	a	h	a	a	a	a	a	h	h
*scaffold44_1095458	a	h	-	h	a	a	h	h	h	h	a	h	h	a	a	h	h	-	-	-	a	h	a	h	h	h	a	a	h	-	-	a	h	a	a	a	a	h	h	a	a	h	a	a	a	a	a	h	h
*scaffold44_1124908	a	h	a	h	-	a	h	h	h	h	a	h	h	a	a	h	h	a	-	-	a	h	a	h	h	h	-	a	h	a	-	-	h	a	a	-	a	h	h	a	a	h	a	a	a	a	a	h	h
*scaffold44_1192146C	a	h	a	-	a	a	h	h	h	h	a	h	h	a	a	h	h	a	a	a	a	-	a	h	h	h	a	a	h	a	a	a	h	a	a	a	a	-	h	a	a	h	a	a	a	a	a	h	h
*scaffold44_1616592C	a	h	a	-	a	a	h	a	h	h	a	h	h	a	a	h	-	a	a	-	a	-	a	h	h	h	a	a	h	a	a	a	h	a	a	a	a	h	-	a	a	h	a	a	a	a	a	h	h
*scaffold44_1943911C	a	h	a	-	a	a	h	a	h	h	a	h	-	a	a	h	-	a	a	-	a	-	a	h	h	h	a	a	h	h	a	a	h	a	a	a	a	h	-	a	a	h	a	a	a	a	a	h	h
*scaffold44_2073413C	a	h	a	-	a	a	h	a	h	h	a	h	h	a	a	h	-	a	a	a	a	-	a	h	h	h	a	a	-	h	a	a	h	a	a	a	a	-	-	a	a	h	a	a	a	a	a	h	h
*scaffold44_2201536C	a	h	a	-	a	a	h	a	h	h	a	h	-	a	a	h	h	a	a	-	a	-	a	h	h	h	a	a	h	h	a	a	h	a	a	a	a	-	-	a	a	h	a	a	a	a	a	h	h
*scaffold44_374066C	h	h	a	-	a	a	h	h	h	h	a	h	h	-	a	h	h	a	a	a	a	h	a	h	h	h	a	a	a	a	a	a	h	a	a	a	a	a	h	a	a	h	a	a	a	h	a	h	h
*scaffold44_374183C	h	h	a	-	a	a	h	h	h	h	a	h	h	a	a	h	h	a	a	a	a	h	a	h	h	h	a	a	a	a	a	a	h	a	a	a	a	a	h	a	a	h	a	a	a	h	a	h	h
*scaffold44_410752	h	h	-	h	-	a	h	h	h	h	a	h	h	a	a	h	h	-	a	-	a	h	a	-	h	h	a	a	a	a	a	a	h	a	a	-	a	-	h	a	a	h	a	a	a	h	a	h	h
*scaffold44_472567	h	h	a	-	a	a	-	h	h	h	a	h	h	a	a	-	h	a	a	a	a	h	a	h	h	h	a	a	a	a	a	a	h	a	a	a	a	a	h	a	a	h	a	a	a	h	a	h	h
*scaffold44_677634C	h	h	a	-	a	a	h	h	h	h	a	h	h	a	a	h	h	a	a	a	a	-	a	h	h	h	a	a	a	a	a	a	h	a	a	a	a	a	h	a	a	-	a	a	a	h	a	h	h
*scaffold44_729704C	a	h	a	-	a	a	h	h	h	h	a	h	h	a	a	h	-	a	a	a	a	h	a	h	h	h	a	a	a	a	a	a	h	a	a	a	a	a	-	a	a	h	a	a	a	h	a	h	h
*scaffold44_729809C	a	h	a	-	a	a	h	h	h	h	a	h	-	a	a	h	-	a	a	a	a	h	a	h	h	h	a	a	a	a	a	a	h	a	a	a	a	a	-	a	a	h	a	a	a	h	a	h	h
*scaffold44_729819C	a	h	a	-	a	a	h	h	h	h	a	h	-	a	a	h	-	a	a	a	a	h	a	h	h	h	a	a	a	a	a	a	h	a	a	a	a	a	-	a	a	h	a	a	a	h	a	h	h
*scaffold44_729903	a	h	a	h	a	a	h	h	h	h	a	h	h	-	-	h	h	-	a	-	a	h	a	h	h	h	-	a	a	-	a	a	h	a	a	a	a	a	h	a	a	h	a	a	a	h	a	h	h
*scaffold44_732883	a	h	a	h	-	a	h	h	h	h	-	h	h	-	a	h	h	a	a	-	a	h	a	h	h	h	a	a	a	a	a	a	h	a	a	a	a	-	h	a	a	h	a	a	a	h	a	h	h
*scaffold44_775673C	a	h	a	-	a	a	h	h	h	h	a	h	-	a	a	h	h	a	a	a	a	-	a	h	h	h	a	a	a	a	a	a	h	a	a	a	a	a	h	a	a	h	a	a	a	h	a	h	h
*scaffold443_30244C	h	h	h	-	h	a	a	h	a	a	a	a	a	a	a	a	h	-	h	a	h	a	a	h	h	a	a	h	a	-	-	h	-	h	a	a	h	-	h	h	h	a	h	a	a	h	a	a	h
*scaffold443_30562C	h	h	-	-	-	a	a	-	a	a	a	a	a	a	a	a	-	-	h	a	h	a	a	h	h	a	a	h	a	h	-	h	h	h	a	a	h	-	-	h	h	a	h	a	a	h	a	a	h
*scaffold443_68510	h	h	h	h	h	a	a	h	a	-	a	a	-	a	-	a	h	h	h	-	h	-	a	h	h	a	a	h	a	h	h	h	h	h	a	-	h	h	h	h	h	a	h	a	a	h	a	a	h
*scaffold443_68604	a	h	a	a	h	h	a	h	a	a	h	a	a	h	a	a	h	h	-	-	a	h	h	h	h	a	h	a	a	h	-	a	h	a	h	h	a	-	-	h	a	a	a	a	h	h	a	a	a
*scaffold443_68608	a	h	a	a	h	h	a	h	a	a	h	a	a	h	a	a	h	h	-	-	a	h	h	h	h	a	h	a	a	h	-	a	h	a	h	h	a	-	-	h	a	a	a	a	h	h	a	a	a
*scaffold443_68625	a	h	a	a	h	h	a	h	a	a	h	a	a	h	a	a	h	h	-	-	a	h	h	h	h	a	h	a	a	h	-	a	h	a	h	h	a	-	-	h	a	a	a	a	h	h	a	a	a
*scaffold448_265712C	a	h	h	-	a	h	h	h	a	a	h	a	a	a	a	h	-	-	a	-	a	h	h	h	h	h	h	h	a	a	h	a	a	h	a	a	a	h	h	h	a	h	h	a	a	a	h	a	a
*scaffold45_868397C	h	a	h	h	h	h	a	h	h	a	a	h	h	a	h	a	h	h	h	a	h	a	h	h	a	h	h	a	a	h	a	a	h	a	h	a	h	a	h	a	h	a	a	a	h	a	h	h	a
*scaffold453_177870C	a	a	a	a	-	a	h	h	a	h	h	a	a	a	h	a	h	h	-	a	a	a	h	h	h	h	a	a	h	h	a	h	h	h	h	a	h	a	a	h	a	h	h	h	h	a	h	h	a
*scaffold453_89642C	a	a	a	a	a	a	h	h	a	h	h	a	a	a	h	a	h	h	h	a	a	-	h	h	h	h	a	-	h	h	a	h	h	h	h	a	h	a	a	h	a	h	h	h	h	a	h	h	-
*scaffold453_89645	a	a	a	a	a	a	h	h	a	h	h	a	a	a	h	a	h	h	h	a	a	-	h	h	h	h	a	a	h	h	a	h	h	h	h	a	h	a	a	h	a	h	h	h	h	a	h	h	a
*scaffold455_224746	h	a	h	-	a	-	a	a	-	h	-	-	-	-	h	a	-	a	h	h	h	a	a	a	a	a	h	h	h	h	h	h	a	h	h	h	h	-	h	a	a	h	h	h	h	h	a	h	h
*scaffold456_114943	a	h	-	-	h	h	a	h	a	-	h	a	-	h	-	a	h	h	a	-	a	h	h	h	h	a	a	a	a	h	h	a	h	a	h	h	a	-	a	h	h	a	a	h	h	h	a	a	a
*scaffold456_119785	a	h	a	a	h	-	a	h	a	a	h	a	a	h	a	a	h	h	a	-	a	h	h	h	h	a	a	a	a	h	h	a	h	a	h	h	a	-	a	h	h	a	a	h	h	h	a	a	a
*scaffold456_122655	a	h	a	-	h	h	a	h	a	a	h	a	a	h	a	a	h	h	a	-	a	h	h	h	h	a	-	a	a	h	h	-	h	a	h	h	a	-	-	h	h	a	a	h	h	h	-	a	a
*scaffold458_130638	a	h	h	h	h	h	h	a	a	a	a	a	a	h	h	a	h	a	a	-	h	h	h	a	a	a	h	h	-	a	a	a	a	a	h	a	a	h	a	h	h	a	h	h	a	a	h	h	a
*scaffold46_1104553	h	h	h	h	h	h	a	a	a	-	a	a	a	h	-	h	h	a	a	-	h	-	a	a	a	a	a	h	a	h	-	h	h	a	a	a	a	h	h	a	h	a	h	a	h	h	a	a	a
*scaffold46_1168486C	-	h	h	-	h	h	a	a	a	a	a	a	a	h	a	h	h	a	a	a	h	a	a	a	a	a	a	h	a	h	a	h	h	a	a	a	a	-	-	a	h	a	h	a	h	h	a	a	a
*scaffold46_1234130C	h	h	-	-	-	h	a	a	-	a	a	a	a	-	a	h	-	a	a	a	h	a	a	a	a	a	a	h	a	h	a	h	h	a	a	a	a	h	-	a	h	a	h	a	h	h	a	a	a
*scaffold46_1374501C	h	h	-	-	-	h	a	a	a	a	a	a	a	h	a	h	h	a	a	a	h	a	a	a	a	a	a	h	a	h	a	h	h	a	a	a	a	-	h	a	h	a	h	a	h	h	a	a	a
*scaffold46_1496927	h	h	h	h	h	h	a	a	a	a	a	a	-	h	-	h	h	-	a	-	h	-	a	a	a	a	a	h	a	h	-	h	h	a	a	-	a	h	h	a	h	a	h	a	h	h	a	a	a
*scaffold46_1537916	h	h	h	h	h	h	a	a	a	a	a	a	-	h	-	h	h	-	a	-	h	-	-	a	a	a	a	h	-	h	a	h	h	a	a	a	a	h	h	a	h	-	h	a	h	h	a	a	a
*scaffold46_793296C	h	h	h	-	h	h	a	a	a	a	a	h	h	h	a	h	h	a	a	-	h	a	a	a	a	h	a	h	a	h	a	h	a	a	a	a	a	h	h	a	h	a	h	a	h	h	a	a	a
*scaffold46_83244C	h	h	h	-	h	h	a	a	a	h	a	h	h	-	a	h	h	a	a	-	h	a	a	a	a	h	a	h	a	h	a	-	a	a	a	a	a	-	h	a	h	a	h	a	h	h	a	a	a
*scaffold46_918055C	h	h	h	-	h	h	a	a	a	a	a	h	h	h	a	h	h	a	a	-	h	a	a	a	a	a	a	h	a	-	a	h	h	a	a	a	a	-	-	a	h	a	h	a	h	h	a	a	a
*scaffold46_997893C	h	h	-	-	-	h	a	a	a	a	a	h	-	-	a	h	-	a	a	-	h	a	a	a	a	a	a	h	a	h	a	h	h	a	a	a	a	-	h	a	h	a	h	a	h	h	a	a	a
*scaffold460_171808	a	h	h	h	h	a	a	a	h	h	h	a	a	h	h	a	-	a	h	-	h	h	a	h	a	a	a	h	h	a	a	a	a	a	h	a	-	h	a	a	-	a	h	-	h	h	h	h	h
*scaffold462_114137	a	h	h	-	a	a	h	a	h	a	a	a	a	a	a	h	a	h	a	h	h	h	a	h	h	h	h	h	h	h	h	a	h	h	h	a	a	-	a	a	a	a	h	h	h	a	a	a	h
*scaffold462_18437C	a	h	h	a	a	a	h	a	h	a	a	a	a	a	a	h	a	h	a	-	h	h	a	h	h	h	h	h	h	h	h	a	h	h	h	a	a	a	a	a	a	a	h	h	h	a	a	a	h
*scaffold462_18447	a	h	h	a	a	a	h	a	h	a	a	a	a	a	a	-	a	h	a	h	-	h	a	h	-	h	h	h	h	h	h	a	h	h	h	a	a	a	a	a	a	a	h	h	-	a	a	a	h
*scaffold462_18515	a	h	h	a	a	a	h	a	h	a	a	a	a	a	a	h	a	h	a	h	h	-	a	h	h	h	h	h	h	h	h	a	h	h	h	a	a	a	a	a	a	a	h	h	h	a	a	a	h
*scaffold462_199488C	a	h	-	a	a	a	h	a	h	a	a	a	a	a	a	h	a	-	a	-	h	-	a	h	h	h	h	h	h	h	h	a	h	h	h	a	a	a	a	a	a	a	h	h	h	a	a	a	h
*scaffold462_201320C	a	h	-	a	a	a	h	a	h	a	a	a	a	a	a	h	a	-	a	-	h	-	a	h	h	h	h	h	h	h	-	a	-	h	h	a	a	a	a	a	a	a	h	h	h	a	a	a	h
*scaffold462_206575C	a	h	h	a	a	a	h	a	h	a	a	a	a	a	a	h	a	h	a	-	h	-	a	h	h	h	h	h	h	h	h	a	h	h	h	a	a	a	a	a	a	a	h	h	h	a	a	a	h
*scaffold465_175022C	a	-	a	h	h	h	a	h	a	a	a	a	a	h	a	a	h	a	a	a	h	h	h	a	a	a	a	a	a	h	a	a	h	a	h	-	a	a	-	h	a	a	a	a	h	h	a	-	h
*scaffold47_105475C	a	h	-	-	-	a	a	a	a	h	a	h	h	a	h	h	-	-	a	a	h	-	a	a	h	h	h	a	h	a	-	h	a	a	a	a	a	a	-	h	a	h	a	h	a	a	h	h	a
*scaffold47_1130354	a	h	h	-	h	a	a	a	a	h	a	h	h	a	h	h	h	h	a	a	a	h	a	a	h	h	h	a	h	a	-	h	a	a	a	a	a	h	h	-	a	h	a	h	a	a	h	h	a
*scaffold47_1229343	-	h	h	h	h	a	a	a	a	h	a	h	h	-	h	h	h	h	a	-	a	h	a	a	h	h	h	a	h	-	h	h	a	a	-	-	a	h	h	h	a	h	a	h	a	a	h	h	a
*scaffold47_1229376C	a	h	h	h	h	a	a	a	a	-	a	h	h	a	h	h	h	h	a	a	a	-	a	a	h	h	h	a	h	a	-	h	a	a	a	a	a	h	h	h	a	h	a	h	a	a	h	h	a
*scaffold47_1329665	a	h	h	h	h	a	a	a	a	h	a	h	h	a	h	h	h	h	a	a	a	h	a	a	h	h	h	a	h	a	h	h	a	a	a	a	a	h	h	h	a	h	a	h	a	a	h	h	a
*scaffold47_1371155	a	h	h	h	h	a	a	a	a	h	a	h	h	-	h	h	h	h	a	-	a	h	a	h	h	h	h	a	h	a	-	h	a	a	a	a	a	h	h	h	a	h	a	h	a	a	h	h	a
*scaffold47_532199	a	h	h	h	h	a	a	a	a	h	a	h	h	a	h	h	h	h	a	-	h	h	a	a	h	h	h	a	h	a	h	h	a	a	a	a	a	a	h	h	a	h	a	h	a	a	h	h	a
*scaffold47_668880	a	h	h	h	h	a	a	a	a	h	a	h	h	a	h	h	h	h	a	a	h	h	a	a	h	h	h	a	h	a	h	h	a	a	a	a	a	a	h	h	a	h	a	h	a	a	h	h	a
*scaffold47_668885C	a	h	h	h	h	a	a	a	a	h	a	h	h	a	h	h	h	h	a	a	h	-	a	a	h	h	h	a	h	a	-	h	a	a	a	a	a	a	h	h	a	h	a	h	a	a	h	h	a
*scaffold47_700738	a	h	h	h	h	a	a	a	a	h	a	h	h	a	h	h	h	h	a	h	h	h	a	a	h	h	h	a	h	-	h	h	a	-	a	-	a	a	h	h	a	h	a	h	a	a	h	h	a
*scaffold47_773884C	a	h	h	-	h	a	a	a	a	h	a	h	h	a	h	h	h	h	a	a	h	-	a	a	h	h	h	a	h	a	-	h	a	a	a	a	a	a	h	h	a	h	a	h	a	a	h	h	a
*scaffold47_846726	a	h	h	h	-	a	a	a	a	h	a	h	h	a	h	h	h	h	a	-	h	h	a	a	-	h	h	a	h	a	h	h	a	a	-	a	a	-	h	h	a	h	a	h	a	a	h	h	a
*scaffold47_846733	a	h	h	h	-	a	a	a	a	h	-	h	h	a	h	h	h	h	a	-	h	h	a	a	-	h	h	a	h	a	h	h	a	a	-	a	a	-	h	h	a	h	a	h	a	a	h	h	a
*scaffold474_45292C	h	a	h	a	a	a	a	a	h	h	a	a	a	a	h	a	a	a	-	h	a	a	a	a	a	a	-	h	h	h	-	-	a	h	h	h	h	a	-	a	a	-	h	h	h	h	a	h	h
*scaffold474_97952C	h	a	h	a	a	a	a	a	h	h	a	a	a	a	h	a	a	a	h	h	a	a	a	a	a	a	-	h	-	h	-	h	a	h	-	-	h	a	-	a	a	h	h	h	h	h	a	h	h
*scaffold49_1015488C	a	a	a	a	a	a	h	h	a	-	h	a	a	a	-	a	h	-	a	a	a	a	h	h	h	h	a	a	h	h	a	h	h	h	h	a	a	a	a	h	a	h	h	h	h	a	h	h	a
*scaffold49_1097014C	a	a	a	a	a	a	h	h	a	h	h	a	a	a	h	a	h	h	h	a	a	a	h	h	h	h	a	a	h	h	a	h	h	h	h	a	h	-	a	h	a	h	h	h	h	a	h	h	a
*scaffold49_1344748C	a	a	a	a	a	a	h	-	a	h	-	a	a	a	h	a	-	-	h	a	a	a	h	h	h	h	a	a	h	h	a	h	h	h	h	a	h	a	a	h	a	h	h	h	h	a	h	h	a
*scaffold49_1379651C	a	a	a	a	a	a	h	h	a	h	-	a	a	a	-	a	-	-	h	a	a	a	h	h	h	h	a	a	h	h	a	h	h	h	h	a	h	a	a	h	a	h	h	h	h	a	h	h	a
*scaffold49_1466179C	a	a	a	a	a	a	h	h	a	h	h	a	a	a	h	a	h	h	h	a	a	a	h	h	h	h	a	a	h	h	a	h	h	h	h	a	h	a	a	h	a	h	h	h	h	a	h	h	a
*scaffold49_1518558	a	a	a	-	-	a	-	h	a	h	h	a	a	a	h	a	-	h	h	-	a	-	h	-	h	h	a	a	h	h	a	h	h	-	h	a	h	a	a	h	a	h	h	h	h	a	h	h	a
*scaffold49_1526745C	a	a	a	-	a	a	h	h	a	h	-	a	a	a	h	a	h	-	h	a	a	a	h	h	h	h	a	a	h	h	a	h	h	h	h	a	h	a	a	h	a	h	h	h	h	a	-	h	a
*scaffold49_179312C	a	a	a	a	a	a	h	h	a	-	h	a	a	a	h	a	h	h	a	a	a	a	h	h	h	h	a	a	h	h	a	h	h	h	h	a	a	a	a	h	a	h	h	h	h	a	a	h	a
*scaffold49_179316C	a	a	a	a	a	a	h	h	a	-	h	a	a	a	h	a	h	-	a	a	a	a	h	h	h	h	a	a	h	h	a	h	h	h	h	a	a	a	a	h	a	h	h	h	h	a	a	h	a
*scaffold49_334029C	a	a	a	a	a	a	h	h	a	h	h	a	a	a	-	a	h	-	a	a	a	a	h	h	h	h	a	a	h	h	a	h	h	h	h	a	a	a	a	h	a	h	h	h	h	a	h	h	a
*scaffold49_73401	a	a	a	a	a	a	h	h	a	h	h	a	a	a	h	a	h	h	a	-	a	a	h	h	h	h	a	a	h	h	-	h	h	h	h	a	a	-	-	h	a	h	h	h	h	a	a	h	a
*scaffold49_92133C	a	a	a	a	a	a	h	h	a	h	h	a	a	a	h	a	h	h	a	a	a	a	h	h	h	h	a	a	h	h	a	h	h	h	h	a	a	a	a	h	a	-	h	h	h	a	a	h	a
*scaffold493_79587C	h	a	h	h	h	h	a	h	h	a	a	h	h	a	h	a	h	a	h	a	h	a	h	h	a	a	h	a	a	h	a	a	h	a	h	a	h	a	h	a	h	a	a	a	h	a	h	h	a
*scaffold493_80720	h	a	h	h	h	h	a	h	h	-	a	h	h	a	h	a	h	a	h	-	h	a	h	h	a	-	h	a	a	h	-	a	h	a	h	a	h	-	h	a	h	-	a	a	h	a	h	h	a
*scaffold494_135911	h	h	h	-	-	a	a	a	h	h	h	a	a	a	h	h	-	-	h	h	a	a	a	a	a	a	a	h	h	h	h	h	a	h	h	h	h	a	h	a	a	h	a	a	h	h	a	h	h
*scaffold494_136003	h	h	h	-	-	a	a	a	h	h	h	a	a	a	h	h	-	-	h	h	a	a	a	a	a	a	a	h	h	h	h	h	a	h	h	h	h	a	h	a	a	h	a	a	h	h	a	h	h
*scaffold5_1038646	h	a	h	h	a	a	h	h	a	h	h	a	a	h	h	a	h	a	h	-	a	-	a	h	h	a	h	a	a	h	a	a	h	a	h	-	-	a	h	a	a	a	a	a	a	h	a	a	a
*scaffold5_1062401C	h	a	h	-	a	a	h	h	a	h	h	a	a	h	h	a	h	a	h	a	a	a	a	h	h	a	h	a	a	h	a	a	h	a	h	h	h	a	h	a	a	a	a	a	a	h	a	a	a
*scaffold5_1062410	h	a	h	h	a	a	h	h	a	h	h	a	a	h	h	a	h	a	h	-	a	-	a	h	h	a	h	a	a	h	-	a	h	a	h	h	h	a	h	a	a	a	a	a	a	h	a	a	a
*scaffold5_1064479C	h	a	h	h	a	a	h	h	a	h	h	a	a	h	h	-	h	a	h	a	a	a	a	h	h	a	h	a	a	h	a	a	h	a	h	h	h	a	h	a	a	a	a	a	a	h	a	a	a
*scaffold5_1074851	h	a	h	h	-	a	h	h	a	h	h	a	-	h	h	a	h	a	h	-	a	-	a	h	h	a	h	a	a	h	a	a	h	a	h	h	h	-	h	a	a	a	a	a	a	h	a	a	a
*scaffold5_1074879C	h	a	h	-	a	a	h	h	a	-	h	a	a	-	h	a	h	a	h	a	a	a	a	h	h	a	h	a	a	h	a	a	h	a	h	-	h	a	-	a	a	a	a	a	a	h	a	a	a
*scaffold5_1103458	h	a	h	h	-	a	h	h	a	h	h	a	a	h	h	a	h	-	h	-	a	-	a	h	h	a	h	a	a	h	a	a	h	a	h	h	h	a	h	a	a	a	a	a	a	h	a	a	a
*scaffold5_1464000C	h	a	h	h	a	a	h	h	a	h	h	a	a	h	h	a	h	a	h	a	a	a	a	h	h	h	h	a	a	-	a	a	h	a	h	h	h	a	h	a	a	a	a	a	a	h	a	a	a
*scaffold5_1487090	h	a	h	h	a	a	h	h	a	h	h	a	a	h	h	a	h	a	h	-	a	a	a	h	h	h	h	a	a	h	-	-	h	a	h	h	h	a	h	a	a	-	a	a	a	h	a	a	a
*scaffold5_1487923	h	a	h	h	-	a	h	h	a	h	h	a	a	h	h	a	h	-	h	h	a	-	a	h	h	h	h	a	a	h	a	a	h	a	h	h	h	a	h	a	a	a	a	a	a	h	a	a	a
*scaffold5_1487936C	h	a	-	-	a	a	h	h	a	h	h	a	a	h	-	a	-	a	h	a	a	a	a	h	h	h	h	a	a	h	a	a	h	a	h	-	h	a	h	a	a	a	a	a	a	h	a	a	a
*scaffold5_1760810	h	a	h	h	a	a	h	h	a	h	h	a	a	h	h	a	h	a	h	-	a	-	a	h	h	h	-	a	a	h	a	a	h	a	h	h	h	-	h	a	a	a	a	a	a	h	a	a	a
*scaffold5_1760969	h	a	h	h	-	a	h	h	a	h	h	a	a	h	h	a	h	a	h	-	a	-	a	h	h	h	h	a	a	h	a	a	h	a	h	h	h	-	h	a	a	a	a	a	a	h	a	a	a
*scaffold5_1761136C	h	a	-	-	a	a	h	-	a	h	-	a	a	-	-	a	-	a	h	-	a	a	a	-	h	h	h	a	a	h	a	a	h	a	h	h	h	a	-	a	a	a	a	a	a	h	a	a	a
*scaffold5_1809785	h	a	h	h	-	a	h	h	a	h	h	a	-	h	h	a	h	-	h	h	a	-	-	h	h	h	h	a	a	h	a	a	h	a	h	h	h	a	h	a	a	a	a	a	a	h	a	a	a
*scaffold5_1841950C	h	a	-	-	a	a	h	-	a	h	-	a	a	-	-	a	-	a	h	a	a	a	a	h	-	h	h	a	a	-	a	a	h	a	h	h	h	a	h	a	a	a	a	a	a	h	a	a	a
*scaffold5_1852311C	h	a	h	-	a	a	h	h	a	h	h	a	a	h	-	a	h	a	h	a	a	a	a	h	h	h	h	a	a	h	a	a	h	a	h	h	h	a	h	a	a	a	a	a	a	h	a	a	a
*scaffold5_1911193	h	a	h	h	a	a	h	h	a	h	h	a	-	h	h	a	h	-	h	-	a	-	a	h	h	h	h	a	a	h	-	a	h	a	h	h	h	-	h	a	a	a	a	a	a	h	a	a	a
*scaffold5_1911231C	h	a	h	h	a	a	h	h	a	h	h	a	a	h	-	a	h	a	h	a	a	a	a	h	h	h	h	a	a	h	a	a	h	a	h	h	h	a	h	a	a	a	a	a	a	h	a	a	a
*scaffold5_1951080	h	a	h	h	-	a	h	h	a	h	h	a	-	h	h	a	h	-	h	-	a	-	a	h	h	h	h	a	a	h	a	a	h	a	h	h	h	a	h	a	a	a	a	a	a	h	a	a	a
*scaffold5_2175488	h	a	h	h	a	a	h	h	a	h	h	a	a	h	h	a	h	a	h	-	a	-	a	h	h	h	h	a	a	h	a	a	h	a	h	h	h	a	h	a	a	a	a	a	a	h	a	a	a
*scaffold5_2279750C	h	a	h	-	a	a	h	h	a	h	h	a	a	h	-	a	h	a	h	a	a	a	a	h	h	h	h	a	a	h	a	a	h	a	h	h	h	a	h	a	a	a	a	a	a	h	a	a	a
*scaffold5_2365743C	h	a	h	-	a	a	h	h	a	h	h	a	a	h	h	a	h	a	h	a	a	a	a	h	h	h	h	a	a	h	a	a	h	a	h	h	h	a	h	a	a	a	a	-	a	h	a	a	a
*scaffold5_2493683C	h	a	-	-	a	a	h	h	a	-	h	a	a	-	-	a	-	a	h	a	a	a	a	h	h	h	h	a	a	-	a	a	h	a	h	h	h	a	h	a	a	a	a	a	a	h	a	a	a
*scaffold5_2493740	h	a	-	h	-	a	h	h	a	h	h	a	-	h	h	a	h	-	h	-	a	-	a	h	h	h	h	a	a	h	a	a	h	a	h	h	h	-	h	a	a	a	a	a	a	h	a	a	a
*scaffold5_2496891C	h	a	-	-	a	a	-	-	a	h	-	a	a	-	-	a	-	a	h	-	a	a	a	h	h	h	h	a	a	h	a	a	h	a	h	h	h	a	h	a	a	a	a	a	a	h	a	a	a
*scaffold5_2496986	h	a	h	h	-	a	h	h	a	h	h	a	-	h	h	a	h	-	h	-	-	-	a	h	h	h	h	a	a	h	-	a	h	a	h	h	h	a	h	a	a	a	a	a	a	h	a	a	a
*scaffold5_2826510	a	a	h	h	a	a	h	a	a	h	h	a	a	h	h	a	h	a	h	-	a	-	a	h	h	h	h	a	a	h	a	a	h	a	h	h	h	a	h	a	a	a	a	a	a	h	a	a	a
*scaffold5_2827619C	a	a	h	-	a	a	h	a	a	h	h	a	a	h	h	a	h	a	h	a	a	a	a	h	h	h	h	a	-	-	a	a	h	a	h	h	h	a	h	a	a	a	a	a	a	h	a	a	a
*scaffold5_2827630C	a	a	h	-	a	a	h	a	a	h	h	a	a	h	h	a	h	a	h	a	a	a	a	h	h	h	h	a	-	-	a	a	h	a	h	h	h	a	h	a	a	a	a	a	a	h	a	a	a
*scaffold5_2842199C	a	a	h	-	a	a	h	a	-	h	h	a	a	-	h	a	h	a	h	a	a	a	a	-	h	h	h	a	a	-	a	a	-	a	-	h	h	a	-	a	a	a	a	a	a	h	a	a	a
*scaffold5_2842214	a	a	h	h	a	a	h	a	a	h	h	a	a	h	h	a	h	a	h	-	a	a	-	h	h	h	h	a	a	h	-	-	h	a	h	h	h	-	h	a	a	a	a	a	a	h	a	a	a
*scaffold5_2869832	a	a	-	h	a	a	h	a	a	h	h	a	-	h	h	a	h	a	h	-	a	a	a	h	-	h	h	a	a	h	a	a	h	a	h	h	h	a	h	a	a	a	a	a	a	h	a	a	a
*scaffold5_2874308	a	a	h	h	a	a	h	a	a	h	h	a	a	h	h	a	h	a	h	-	a	a	a	h	h	h	h	a	a	h	a	a	h	a	h	h	h	a	-	a	a	a	a	a	a	h	a	a	a
*scaffold5_2874309	a	a	h	h	a	a	h	a	a	h	h	a	a	h	h	a	h	a	h	-	a	a	a	h	h	h	h	a	a	h	a	a	h	a	h	h	h	a	-	a	a	a	a	a	a	h	a	a	a
*scaffold5_2958497C	a	h	a	a	a	h	h	h	a	a	h	a	a	a	h	a	-	-	h	-	a	a	h	h	a	h	h	a	h	a	h	a	a	h	a	a	h	-	h	a	a	a	h	h	h	a	h	h	a
*scaffold5_2964673	a	a	h	h	a	a	h	a	a	h	h	a	a	h	h	a	h	a	h	-	a	-	a	h	h	h	h	a	a	h	-	a	h	a	h	h	h	-	h	a	a	-	a	a	a	h	-	a	a
*scaffold5_3093944C	a	a	-	-	a	a	h	a	a	h	h	a	a	-	-	a	h	a	h	a	a	a	a	h	h	h	-	a	a	h	a	a	h	a	-	h	h	a	h	a	a	a	h	a	h	h	a	a	a
*scaffold5_749653	h	a	h	h	a	a	h	h	a	h	h	a	a	h	h	a	h	-	h	-	a	-	a	h	h	a	h	a	a	h	-	a	h	a	h	h	h	a	h	a	a	a	a	a	a	h	a	a	a
*scaffold5_838274C	h	a	h	-	a	a	h	h	a	h	h	a	a	-	h	a	h	a	h	a	a	a	a	h	h	a	h	a	a	h	a	a	h	a	h	h	h	a	-	a	a	a	a	a	a	h	a	a	a
*scaffold5_889712	h	a	h	h	a	a	h	h	a	h	h	a	a	h	h	a	h	a	h	-	a	-	a	h	h	a	h	a	a	h	-	h	h	a	h	h	h	-	h	a	a	-	a	a	a	h	-	a	a
*scaffold5_906281C	h	a	h	-	a	a	h	h	a	h	h	a	a	h	h	a	h	a	h	a	a	a	a	h	h	a	h	a	a	h	a	a	h	a	h	h	h	a	h	a	a	a	a	a	a	h	a	a	a
*scaffold5_920568C	h	a	h	-	a	a	h	h	a	h	h	a	a	h	h	a	h	a	h	a	a	a	a	h	h	a	h	a	a	h	a	a	h	a	h	h	h	a	h	a	a	a	a	a	a	h	a	a	a
*scaffold50_1055868C	a	a	-	a	h	a	h	a	h	-	a	h	-	a	-	a	a	a	a	a	h	a	h	a	a	a	h	h	h	-	-	h	h	h	h	h	a	a	-	a	a	-	h	h	a	h	a	a	h
*scaffold50_1132822C	a	a	h	a	-	a	h	a	h	h	a	h	-	a	h	a	a	a	a	a	h	a	h	a	a	a	h	h	h	h	-	h	h	h	h	h	a	a	h	a	a	-	h	h	a	h	a	a	h
*scaffold50_1153812C	a	a	h	a	h	a	h	a	h	-	a	h	-	a	-	a	a	a	a	a	h	a	h	a	a	a	-	h	h	h	-	h	h	h	-	-	a	a	-	a	a	h	h	h	a	h	a	a	h
*scaffold50_1274815C	a	a	h	a	h	a	h	a	h	h	a	h	h	a	h	a	a	a	a	a	h	a	h	a	a	a	h	h	h	-	-	h	h	h	h	h	a	a	-	a	a	-	h	h	a	h	a	a	h
*scaffold50_1287265C	a	a	h	a	h	a	h	a	h	h	a	h	-	a	h	a	a	a	a	a	h	a	-	a	a	a	h	h	h	h	-	h	h	h	h	h	a	a	h	a	a	h	h	h	a	h	a	a	h
*scaffold50_1296275C	a	a	h	a	h	a	h	a	h	h	a	h	h	a	h	a	a	a	a	a	h	a	-	a	a	a	h	h	h	h	h	h	h	h	h	h	a	a	h	a	a	h	h	h	a	h	a	a	h
*scaffold50_1336744	-	a	h	a	h	a	h	a	h	h	a	h	h	a	h	a	a	a	a	a	h	-	h	a	a	a	h	h	h	h	h	h	h	h	h	h	a	-	h	a	a	h	h	h	a	h	a	a	h
*scaffold50_1336745	-	a	h	a	h	a	h	a	h	h	a	h	h	a	h	a	a	a	a	a	h	a	h	a	a	a	h	h	h	h	h	h	h	h	h	h	a	-	h	a	-	h	h	h	a	h	a	a	h
*scaffold50_1361150C	a	a	-	a	-	a	h	a	h	h	a	h	-	a	h	a	a	a	a	a	h	a	h	a	a	a	h	h	h	h	-	h	h	h	h	h	a	a	-	a	a	h	h	h	a	h	a	a	h
*scaffold50_1434906	a	a	h	-	h	a	h	a	h	-	-	h	h	a	h	a	-	a	a	-	h	-	h	a	a	a	h	h	h	h	h	h	h	h	h	h	a	-	h	a	a	h	h	h	a	h	a	a	h
*scaffold50_481376C	a	a	-	a	-	a	h	a	h	-	a	h	-	a	-	a	a	a	a	a	h	a	-	a	a	a	h	h	h	h	-	h	a	h	h	h	a	a	h	a	a	h	h	h	h	h	a	a	h
*scaffold50_504567	a	a	h	-	h	a	h	-	h	h	a	h	h	-	h	a	-	-	a	-	h	-	h	a	a	a	h	h	h	h	h	h	a	h	h	h	a	a	h	a	a	h	h	h	h	h	a	a	h
*scaffold50_52808C	h	a	h	a	h	a	h	a	h	h	a	a	a	a	h	a	a	a	a	a	h	a	h	a	a	a	h	h	h	h	-	h	a	h	h	h	a	a	h	a	a	h	h	h	h	h	a	a	h
*scaffold501_104292C	h	a	-	h	a	-	h	h	a	h	h	a	a	a	a	a	h	h	h	a	a	a	h	h	h	h	h	a	h	h	a	h	a	h	h	a	h	a	a	h	-	h	h	h	a	a	h	h	a
*scaffold505_238996	-	a	h	h	h	h	a	-	a	a	a	h	h	a	h	a	h	h	h	a	h	a	h	h	a	h	a	a	a	h	a	a	h	h	h	a	h	h	-	a	h	a	a	a	h	a	-	h	a
*scaffold505_239190	h	a	h	h	h	h	a	h	a	a	a	h	h	a	h	a	h	h	h	a	h	a	h	h	a	h	a	a	a	h	a	a	h	h	h	a	h	h	h	a	h	a	a	a	h	a	h	h	a
*scaffold508_149940C	h	a	h	a	a	a	a	h	a	a	a	h	h	a	a	a	a	a	a	-	a	a	h	h	h	h	a	a	a	h	a	h	h	h	a	-	a	h	h	h	h	h	a	a	a	a	a	a	h
*scaffold51_103195C	h	a	h	-	h	h	a	h	h	a	a	h	h	a	h	a	h	h	-	a	h	a	h	h	a	a	h	a	a	h	a	a	h	a	h	a	h	a	-	a	h	a	a	a	h	a	h	h	a
*scaffold51_1033025C	h	a	h	-	h	h	a	h	h	a	a	h	h	a	h	a	h	h	h	a	h	a	h	h	a	a	h	a	a	h	a	a	h	a	h	a	h	a	h	a	h	a	a	a	h	a	h	h	a
*scaffold51_1033081	h	a	h	h	h	h	a	h	h	a	a	h	h	a	h	a	h	h	h	-	h	a	h	h	a	a	h	a	a	h	a	a	h	a	h	-	h	-	h	a	h	a	a	a	h	a	h	h	a
*scaffold51_1153758	h	a	h	h	h	h	a	h	h	a	a	h	h	-	h	a	h	h	h	-	h	-	h	h	-	a	h	a	a	h	-	a	h	a	h	a	h	-	h	a	h	-	a	a	h	a	h	h	a
*scaffold51_1166836C	h	a	h	h	h	h	a	h	h	a	a	h	h	a	h	a	h	h	h	a	h	a	h	h	a	a	h	a	a	h	a	-	h	a	h	a	h	a	h	a	h	a	a	a	h	a	h	h	a
*scaffold51_1166837C	h	a	h	h	h	h	a	h	h	a	a	h	h	a	h	a	h	h	h	a	h	a	h	h	a	a	h	a	a	h	a	-	h	a	h	a	h	a	h	a	h	a	a	a	h	a	h	h	a
*scaffold51_1166877C	-	a	h	h	h	h	a	h	h	a	a	h	h	a	h	a	h	h	h	a	h	a	h	h	a	a	h	a	a	h	a	a	h	a	h	a	h	a	h	a	h	a	a	a	h	a	h	h	a
*scaffold51_1225631	h	a	h	h	h	h	a	h	h	-	a	h	h	-	h	a	h	h	h	-	h	a	h	h	-	a	h	a	a	h	-	a	h	a	h	a	h	-	h	a	h	-	a	a	h	a	h	h	a
*scaffold51_336601C	h	a	h	-	h	h	a	h	h	a	a	h	h	a	h	a	h	h	h	a	h	a	h	h	a	a	h	a	a	h	a	a	h	a	h	a	h	a	h	a	h	a	a	a	h	a	h	h	a
*scaffold51_390903C	h	a	h	-	-	h	a	h	h	a	a	h	h	a	h	a	h	h	h	a	h	a	h	h	a	a	h	a	a	h	a	a	h	a	h	a	h	a	h	a	h	a	a	a	h	a	h	h	a
*scaffold51_635495	h	a	h	h	h	h	a	h	h	a	a	h	h	a	h	a	h	h	h	-	h	-	h	h	a	a	h	a	a	h	-	a	h	a	h	a	h	a	h	a	h	a	a	a	h	a	h	h	a
*scaffold51_640770C	h	a	h	h	h	h	a	h	h	a	a	h	h	a	h	-	h	h	h	-	h	a	h	h	a	a	h	a	a	h	a	a	h	a	h	a	h	a	h	a	h	a	a	a	h	a	h	h	a
*scaffold51_652676	h	a	h	h	h	h	a	h	h	a	a	h	h	a	h	a	h	h	h	h	h	-	-	h	a	a	-	a	a	h	-	a	h	a	h	-	h	-	h	a	h	a	a	a	h	a	h	h	a
*scaffold51_652724	h	a	h	h	h	h	a	h	h	a	a	h	h	a	h	a	h	h	h	h	h	-	-	h	a	a	h	a	a	h	-	a	-	a	h	a	h	-	h	a	h	a	a	a	h	a	h	h	a
*scaffold51_652745	h	a	h	h	h	h	a	h	h	a	a	h	h	a	h	a	h	h	h	h	h	-	-	h	a	a	h	a	a	h	-	a	-	a	h	a	h	-	h	a	h	a	a	a	h	a	h	h	a
*scaffold51_918385	h	a	h	h	h	h	a	h	h	-	a	h	h	-	h	a	h	h	h	h	h	-	h	h	a	a	h	a	a	h	-	h	h	a	h	a	h	-	h	a	h	a	a	a	h	a	h	h	a
*scaffold51_936207C	h	a	h	-	-	h	a	h	h	a	a	h	h	a	h	a	h	h	h	a	h	a	h	h	a	a	h	a	a	h	a	a	h	a	h	a	h	a	h	a	h	a	a	a	h	a	h	h	a
*scaffold51_936328C	h	a	h	-	h	h	a	h	h	a	a	h	h	a	h	a	h	h	h	a	h	a	h	h	a	a	h	a	a	h	a	a	h	a	h	a	h	a	h	a	h	a	a	a	h	a	h	h	a
*scaffold51_984742C	h	a	h	h	h	h	a	h	h	a	a	h	h	a	h	-	h	h	-	a	h	a	h	h	a	a	h	a	a	h	a	a	-	a	h	a	h	a	-	a	-	a	a	a	h	a	h	h	a
*scaffold51_984929C	h	a	h	h	h	h	a	h	h	a	a	h	h	a	h	a	h	h	-	a	h	a	h	h	a	a	h	a	a	h	a	a	h	a	h	-	h	a	-	a	-	a	a	a	h	-	h	h	a
*scaffold511_77967C	a	h	a	a	h	a	h	h	a	a	a	h	-	a	-	h	a	-	a	a	a	-	a	h	a	h	h	a	h	h	-	-	a	a	h	a	a	a	a	h	a	a	h	h	a	h	h	a	a
*scaffold52_1111327C	a	h	h	h	h	a	a	a	a	h	a	h	h	a	h	h	h	h	a	a	h	h	a	a	h	a	h	h	a	a	h	a	a	a	a	a	a	a	h	a	h	a	a	h	a	h	h	a	a
*scaffold52_1141764	a	h	h	h	h	a	a	a	a	h	-	h	h	-	h	h	h	h	a	-	h	h	a	a	h	a	h	h	a	-	h	a	a	a	a	a	-	-	h	a	h	a	a	h	a	h	h	a	a
*scaffold52_1216809	a	h	h	h	h	a	a	a	a	h	a	h	h	-	h	h	h	h	a	-	h	h	-	a	h	a	h	h	a	a	h	a	a	a	a	-	a	a	h	a	h	a	a	h	a	h	h	a	a
*scaffold52_1216830	a	h	h	h	h	-	a	a	a	h	a	h	h	-	h	h	h	h	a	-	h	h	-	a	h	a	h	h	a	a	h	a	a	a	a	-	a	a	h	a	h	a	a	h	a	h	h	a	a
*scaffold52_1233134	a	h	h	h	h	a	a	a	a	h	a	h	h	a	h	h	h	h	a	a	h	h	a	a	h	a	h	h	a	-	h	-	-	a	a	-	a	-	h	a	h	a	a	h	a	h	h	a	a
*scaffold52_1509949C	a	h	h	h	h	a	a	a	a	h	a	h	h	a	-	h	h	h	a	a	h	-	a	a	h	a	h	h	a	a	h	a	a	a	a	a	a	a	h	h	h	a	a	h	a	h	h	a	a
*scaffold52_1510057	a	h	h	h	h	a	a	a	a	h	a	h	h	a	h	-	h	h	a	a	h	-	a	a	h	a	h	h	a	a	h	a	a	a	a	a	a	a	h	h	h	a	a	h	a	h	h	a	a
*scaffold52_162110C	a	h	h	h	h	a	a	a	a	h	a	h	h	a	h	h	h	h	a	a	h	h	a	a	h	a	h	h	a	a	h	a	a	a	a	a	a	a	h	a	h	a	a	h	a	h	h	a	a
*scaffold52_174521C	a	h	h	h	h	a	a	a	a	h	a	h	h	a	h	h	h	h	a	a	h	h	a	a	-	a	h	h	a	a	h	a	a	a	a	a	a	a	h	a	h	a	a	h	a	h	h	a	a
*scaffold52_177358	a	h	h	h	h	a	a	a	a	h	a	h	h	a	h	h	h	h	a	a	h	h	a	a	h	a	h	h	a	a	h	a	a	a	a	a	a	a	h	a	h	a	a	h	a	h	h	a	a
*scaffold52_323083	a	h	h	h	h	a	a	a	a	h	a	h	h	a	h	h	h	h	a	-	h	h	a	a	h	a	h	h	a	a	h	a	a	a	a	a	a	a	h	a	h	a	a	h	a	h	h	a	-
*scaffold52_414468	a	h	h	h	h	a	a	a	a	h	-	-	h	a	h	h	h	h	a	-	h	h	a	a	h	a	h	h	a	a	h	a	a	a	a	a	a	a	h	a	h	a	a	h	a	h	h	a	a
*scaffold52_479686	a	h	h	-	h	a	a	a	a	h	a	h	h	a	h	h	h	h	a	a	h	h	a	a	h	a	h	h	a	a	h	a	a	a	a	a	a	a	h	a	h	a	a	h	a	h	h	a	a
*scaffold52_520473	a	h	h	h	h	a	a	-	a	h	a	h	h	-	h	h	h	h	a	-	h	h	a	a	h	a	h	h	a	a	h	a	a	a	a	a	a	-	h	a	h	a	a	h	a	h	h	a	a
*scaffold52_53940C	a	h	h	h	-	a	a	a	a	h	a	h	h	a	-	h	h	h	a	a	h	-	a	a	h	a	h	h	a	a	-	a	a	h	a	a	a	a	h	a	h	a	a	h	a	h	h	a	a
*scaffold52_920493C	a	h	h	h	h	a	a	a	a	-	a	h	h	a	h	h	h	h	a	a	h	h	a	a	h	a	h	h	a	a	-	a	a	a	a	a	a	a	h	a	h	a	a	h	a	h	h	a	a
*scaffold52_920679	a	h	h	h	h	a	a	a	a	h	a	h	h	a	h	h	h	h	a	-	h	h	a	a	h	a	h	h	a	a	h	a	a	a	a	a	a	-	h	a	h	a	a	h	a	h	h	a	a
*scaffold52_921048	a	h	h	h	h	a	a	a	a	h	a	h	h	a	h	h	h	h	a	-	h	h	a	a	h	a	h	h	a	a	h	a	a	a	a	a	a	-	h	a	h	a	a	h	a	h	h	a	a
*scaffold52_921128C	a	h	-	-	h	a	a	a	a	h	a	h	h	a	h	h	h	h	a	a	h	h	a	a	h	a	h	h	a	a	h	a	a	a	a	a	a	a	h	a	h	a	a	h	a	h	h	a	a
*scaffold52_921302	a	-	h	h	h	a	a	a	a	h	a	h	h	a	h	h	h	h	a	a	h	h	a	a	h	a	h	h	a	a	h	a	a	a	a	a	a	a	h	a	h	a	a	h	a	h	h	a	a
*scaffold52_94004C	a	h	h	-	h	a	a	a	a	-	a	h	h	a	h	h	h	h	a	a	h	h	a	a	h	a	h	h	a	a	h	a	a	-	a	a	a	a	h	a	h	-	a	h	a	h	h	a	a
*scaffold52_94762C	a	h	h	h	h	a	a	a	a	h	a	h	h	a	h	h	h	h	a	a	h	-	a	a	h	a	h	h	a	a	h	a	a	h	a	a	a	a	h	a	h	a	a	h	a	h	h	a	a
*scaffold52_980120	a	h	h	h	h	a	a	a	a	h	-	h	h	a	h	h	h	h	a	-	h	h	a	a	h	a	h	h	a	a	h	a	a	a	a	a	a	a	h	a	h	a	a	h	a	h	h	a	a
*scaffold528_144527	h	a	h	h	h	h	h	h	a	h	h	h	h	a	h	a	h	-	a	-	a	h	h	h	h	h	a	h	a	h	a	h	h	a	h	h	a	a	a	h	h	h	a	h	h	h	a	h	a
*scaffold528_160990C	h	h	h	h	h	a	a	h	a	a	a	a	-	a	-	a	h	a	a	-	h	a	a	h	h	a	a	h	a	a	-	-	-	a	a	a	a	-	-	h	h	a	h	a	a	h	a	a	h
*scaffold528_180407	h	h	h	h	h	a	a	h	a	-	a	a	-	-	a	a	h	-	a	-	h	-	a	h	h	a	a	h	a	h	h	h	h	a	a	a	a	h	h	h	h	a	h	a	a	h	a	a	h
*scaffold528_185053	h	h	h	h	h	a	a	h	a	a	a	a	-	-	a	a	h	-	a	h	h	-	a	h	h	a	a	h	a	h	h	h	h	a	a	a	a	h	h	h	h	a	h	a	a	h	a	a	h
*scaffold528_185062	h	h	h	h	h	a	a	h	a	a	a	a	-	-	a	a	h	-	a	h	h	-	a	h	h	a	-	h	a	h	h	h	h	a	a	a	a	h	h	h	h	a	h	a	a	h	a	a	h
*scaffold529_22086	a	a	a	-	a	a	h	a	a	a	a	a	a	a	h	a	a	a	a	-	a	-	h	h	a	a	h	h	a	h	-	a	a	a	h	-	a	h	-	h	a	a	a	a	h	h	h	a	a
*scaffold53_1473648	a	h	a	a	a	a	h	a	h	a	h	a	a	a	a	h	a	h	a	h	h	h	a	h	h	h	h	h	a	h	h	a	h	a	a	h	a	-	a	a	a	a	h	h	h	h	a	a	h
*scaffold53_1473663	a	h	a	a	a	a	h	a	h	a	h	a	a	a	a	h	a	h	a	h	h	h	a	h	h	h	h	h	a	h	h	a	h	a	a	h	a	-	a	a	a	a	h	h	h	h	a	a	h
*scaffold53_1494126C	a	h	a	a	a	a	h	a	h	a	h	a	a	a	a	h	a	-	a	a	h	-	a	h	h	h	h	h	a	h	h	a	h	a	a	h	a	a	a	a	a	a	h	h	h	h	a	a	h
*scaffold53_1787146C	a	h	a	a	a	a	h	a	h	a	h	a	a	a	a	h	a	-	a	-	h	-	a	h	h	h	h	h	a	h	h	a	h	a	a	h	a	a	a	a	h	a	h	h	h	h	a	a	h
*scaffold53_1809068C	a	h	a	a	a	a	h	a	h	a	h	a	a	a	a	h	a	h	a	-	h	-	a	h	h	h	h	h	a	h	h	a	h	a	a	h	a	a	a	a	h	a	h	h	h	h	a	a	h
*scaffold53_1809222	a	h	-	-	a	a	h	a	h	-	h	a	a	a	a	h	a	h	-	h	h	h	a	h	h	h	h	h	a	h	h	a	h	a	a	h	a	a	a	a	h	a	h	h	h	h	a	a	h
*scaffold53_1957325C	a	h	a	a	a	a	h	a	h	a	h	a	a	a	a	h	a	h	a	-	h	h	a	h	h	h	h	h	a	h	h	a	h	a	a	h	a	a	a	a	h	h	h	h	h	h	a	a	h
*scaffold53_1958200	a	h	a	-	-	a	h	a	h	-	h	a	-	a	-	h	a	h	a	h	h	h	a	h	h	h	h	h	a	h	h	-	h	a	a	h	a	-	a	-	h	h	h	h	h	h	a	a	h
*scaffold53_1997824	a	h	a	-	a	a	h	a	h	a	h	a	a	a	a	h	a	h	a	h	h	h	a	h	h	h	h	h	a	h	h	-	h	a	a	h	a	-	-	a	h	h	h	h	h	h	a	a	h
*scaffold53_800356C	h	a	a	a	-	a	h	a	h	a	h	a	a	a	a	a	h	-	h	a	h	a	a	h	h	a	a	a	a	a	h	h	h	h	a	a	h	a	a	h	h	-	a	a	h	h	h	h	h
*scaffold532_148028	a	a	-	h	-	a	a	a	h	a	a	h	h	a	-	a	h	-	a	h	a	h	a	h	h	a	a	a	h	h	-	h	h	a	a	a	a	h	h	a	a	a	a	a	a	a	a	h	h
*scaffold532_184287C	a	a	a	h	a	a	a	a	h	a	a	h	h	a	a	a	h	a	a	-	a	-	a	h	h	a	a	a	h	h	a	a	h	a	a	a	a	-	-	a	a	a	a	a	a	a	a	h	h
*scaffold532_184294	a	a	a	h	a	a	a	a	h	a	a	h	h	a	a	a	h	a	a	h	a	h	a	h	h	a	a	a	h	h	a	h	h	a	-	a	a	h	h	a	a	a	a	a	a	a	a	h	h
*scaffold532_184300	a	a	a	h	a	a	a	a	h	a	a	h	h	a	a	a	h	a	a	h	a	h	a	h	h	a	a	a	h	h	a	h	h	a	-	a	a	h	h	a	a	a	a	a	a	a	a	h	h
*scaffold532_184447	a	a	a	h	a	a	a	a	h	a	a	h	h	a	a	a	h	a	a	h	a	h	a	h	h	a	a	a	h	h	a	h	h	a	-	-	a	h	h	a	a	a	a	a	a	a	a	h	h
*scaffold532_184451C	a	a	a	h	a	a	a	a	h	a	a	h	h	a	a	a	h	a	a	-	a	-	a	h	h	a	a	a	h	h	a	a	h	a	a	a	a	-	-	a	a	a	a	a	a	a	a	h	h
*scaffold532_184478C	a	a	a	h	a	a	a	a	h	a	a	h	h	a	a	a	h	a	a	-	a	-	a	h	h	a	a	a	-	h	a	a	h	a	a	a	a	-	-	a	a	a	a	a	a	a	a	h	h
*scaffold532_66795	a	a	a	h	a	a	a	a	h	-	a	h	h	a	a	a	h	a	a	h	a	h	a	h	h	a	a	a	h	h	-	h	h	a	a	a	a	h	h	a	a	-	a	a	a	a	a	h	h
*scaffold532_66802C	-	a	a	-	a	a	a	a	h	a	a	h	h	a	a	a	h	a	a	-	a	h	a	h	h	a	a	a	h	h	a	h	h	a	a	a	a	h	h	a	a	a	a	a	a	a	a	h	h
*scaffold534_149978	a	h	-	h	h	h	a	a	a	h	a	h	h	h	a	h	h	a	h	h	h	-	a	a	a	h	a	a	a	h	a	h	a	a	a	a	h	h	h	a	-	a	h	h	h	h	a	a	a
*scaffold539_118994C	a	h	h	h	a	h	h	h	a	a	h	a	a	a	a	h	h	h	a	h	a	h	h	h	h	h	h	h	a	a	h	a	a	h	a	a	a	h	h	h	a	h	h	a	a	a	h	a	a
*scaffold539_119292	a	h	a	h	a	h	h	a	a	a	-	a	a	a	a	a	a	a	a	-	a	-	h	h	h	h	h	h	a	a	h	a	a	h	a	a	a	h	h	h	a	h	h	a	a	a	h	a	a
*scaffold54_772412	a	h	h	h	-	h	h	h	a	a	a	a	a	h	h	a	h	a	a	-	h	h	h	a	a	a	h	h	a	a	a	a	a	a	h	a	a	h	a	h	a	a	h	h	a	a	h	h	a
*scaffold54_909287C	a	h	h	h	h	h	h	h	a	a	a	a	a	h	h	a	h	a	a	a	h	h	-	a	a	a	h	h	a	a	a	a	a	a	-	a	a	-	a	h	a	a	h	h	a	a	h	h	a
*scaffold54_909288C	a	h	h	h	h	h	h	h	a	a	a	a	a	h	h	a	h	a	a	a	h	h	-	a	a	a	h	h	a	a	a	a	a	a	-	a	a	-	a	h	a	a	h	h	a	a	h	-	a
*scaffold54_909770	a	h	h	h	h	h	h	h	a	-	a	a	a	h	h	a	h	a	a	h	h	h	h	a	a	a	h	h	a	-	-	-	a	a	h	-	a	h	a	h	-	a	h	h	a	a	h	h	a
*scaffold540_171293	a	h	-	-	-	a	h	a	h	a	h	a	-	a	a	h	a	h	a	h	h	h	a	h	h	h	h	h	a	h	h	a	h	a	a	h	a	a	a	a	a	a	h	h	h	h	a	a	h
*scaffold542_115467	a	h	a	-	h	a	h	a	h	h	h	a	a	a	a	a	a	a	-	h	h	-	a	h	a	h	h	h	h	-	-	a	a	a	h	h	a	h	h	a	h	a	a	a	h	a	h	h	a
*scaffold542_32773C	h	h	a	a	h	a	h	a	h	-	h	a	a	a	a	a	a	a	-	a	h	a	a	h	-	h	h	h	h	a	a	a	a	a	h	h	a	-	h	h	h	a	a	a	h	a	h	h	a
*scaffold55_1112511C	a	h	a	a	a	a	h	h	a	a	a	a	a	a	h	h	h	a	h	a	h	a	h	h	h	a	h	h	h	a	-	a	a	a	a	a	h	a	h	h	a	a	a	h	h	h	h	a	a
*scaffold55_1112611C	a	h	a	a	a	a	h	h	a	a	a	a	a	a	h	h	h	a	h	a	h	a	h	h	h	a	h	h	h	a	-	a	a	a	a	a	h	a	h	h	a	a	a	h	h	h	h	a	a
*scaffold55_1170489	a	h	a	-	-	a	h	h	a	-	a	a	-	a	h	h	h	-	h	h	h	-	h	h	h	a	h	h	h	a	h	a	a	a	a	a	h	a	h	h	a	a	a	h	h	h	h	a	a
*scaffold55_1212487	a	h	a	-	-	a	h	h	a	a	a	a	a	-	h	h	h	-	h	h	h	-	h	h	h	a	h	h	h	a	h	a	a	a	a	-	h	-	h	h	a	a	a	h	h	h	h	a	a
*scaffold55_1292580C	a	h	a	a	a	a	h	h	a	a	a	a	a	a	h	h	-	a	h	-	h	a	h	h	h	a	h	h	h	a	h	a	a	a	a	a	h	a	h	h	a	a	a	h	h	h	h	a	a
*scaffold55_1400510	a	h	a	a	a	a	h	h	a	a	a	a	a	a	h	h	h	a	h	h	h	-	h	h	h	a	h	h	h	a	h	-	a	a	a	a	h	a	h	h	a	a	a	h	h	h	h	a	a
*scaffold55_361271C	a	h	a	a	a	a	h	h	a	a	a	a	a	a	h	h	h	a	h	a	h	a	h	h	h	a	h	h	h	a	-	a	a	a	h	a	h	a	h	h	a	-	a	h	h	h	h	a	a
*scaffold55_535000C	a	h	a	a	a	a	h	h	a	a	a	a	a	a	-	h	-	a	h	-	h	a	h	h	h	a	h	h	h	a	h	a	-	a	a	a	h	a	-	h	a	a	a	h	h	h	h	a	a
*scaffold55_535036	a	h	-	-	a	a	h	h	a	-	a	a	-	a	h	h	h	-	h	h	h	a	h	h	h	a	h	h	h	a	h	a	a	a	a	a	h	a	h	h	a	a	a	h	h	h	h	a	a
*scaffold55_546329	a	h	a	-	a	a	h	h	a	a	a	a	a	a	h	h	h	a	h	h	h	a	h	h	h	a	h	h	h	a	h	a	a	a	a	-	h	-	h	h	-	a	a	h	h	h	h	a	a
*scaffold55_742553C	a	h	a	a	a	a	h	h	a	a	a	a	a	a	h	h	h	a	h	-	h	a	h	h	h	a	h	h	h	a	-	a	a	a	a	a	h	a	h	h	a	a	a	h	h	h	h	a	a
*scaffold55_742863C	a	h	a	a	a	a	h	h	a	a	a	a	a	a	h	h	-	a	h	a	h	a	h	h	h	a	-	h	h	a	h	a	a	a	a	a	h	a	h	h	a	a	a	h	h	h	h	a	a
*scaffold55_749396C	a	h	-	-	-	h	a	a	a	a	-	a	a	h	-	a	a	a	h	a	a	a	h	h	a	a	-	h	h	a	a	a	h	a	a	a	h	a	a	h	a	a	a	h	a	a	a	a	a
*scaffold55_755508	a	h	a	a	a	a	h	-	a	a	a	a	a	a	h	h	h	a	h	h	h	-	h	h	h	a	h	-	h	a	h	a	a	a	a	a	h	a	h	h	a	a	a	h	h	-	h	a	a
*scaffold55_755544C	a	h	a	a	a	a	h	h	a	a	a	a	a	a	-	h	-	a	h	a	h	a	h	h	h	a	h	h	h	a	-	a	-	a	a	a	-	a	-	h	a	a	-	h	h	h	h	a	a
*scaffold553_16545	h	a	a	-	a	a	h	h	h	a	a	a	a	h	h	h	h	h	h	h	a	-	h	a	h	a	h	h	h	a	h	a	a	h	a	a	h	a	h	h	a	a	a	h	h	a	h	h	a
*scaffold557_153669C	a	a	a	-	a	a	a	a	h	a	a	-	h	a	a	a	h	a	a	-	a	-	a	h	h	a	a	a	h	h	-	h	h	a	a	a	a	h	h	a	a	a	a	a	a	a	a	h	h
*scaffold557_153691C	a	a	a	-	a	a	a	a	h	a	a	h	h	a	a	a	h	a	a	-	a	-	a	h	h	a	a	a	h	h	-	h	h	a	a	a	a	h	h	a	a	a	a	a	a	a	a	h	h
*scaffold558_164006	a	a	h	-	h	h	a	a	h	h	h	a	a	a	a	a	a	a	a	h	h	h	h	a	a	a	a	h	a	h	h	a	a	h	h	-	a	h	h	a	h	h	h	h	h	h	h	a	h
*scaffold56_1139269C	a	h	a	h	-	h	h	a	a	a	h	-	a	a	a	h	h	h	-	a	a	h	h	h	a	h	h	h	a	a	h	a	a	h	a	a	a	-	h	h	a	h	h	a	a	a	h	a	a
*scaffold56_1139295C	a	h	a	h	a	h	h	a	a	a	h	a	a	a	a	h	h	h	a	a	a	h	h	h	a	h	h	h	a	a	h	a	a	h	a	a	a	h	h	h	a	h	h	a	a	a	h	a	a
*scaffold56_1139999	a	h	a	h	a	h	h	a	a	a	h	a	-	a	a	h	h	h	a	-	a	h	h	h	a	h	h	h	a	a	h	a	a	h	a	a	a	h	h	h	a	h	h	a	a	a	h	a	a
*scaffold56_1140950	-	h	a	h	a	h	h	a	a	a	h	a	a	-	-	h	h	h	a	h	a	h	h	h	a	h	h	h	a	-	h	-	a	h	-	a	a	h	h	h	a	h	h	a	a	a	h	a	a
*scaffold56_292096C	a	h	h	-	a	h	h	a	a	a	h	a	a	a	a	h	h	h	-	-	a	-	h	h	a	h	h	h	a	-	-	a	a	h	a	a	a	-	-	h	a	h	h	a	a	a	h	a	a
*scaffold56_292117C	a	h	a	-	a	h	h	h	a	h	h	a	a	a	a	h	h	h	a	a	a	-	h	h	a	h	h	a	h	a	-	a	a	h	a	a	a	a	-	h	a	h	h	a	a	a	a	a	h
*scaffold56_2958C	a	h	h	h	-	h	h	h	a	a	h	a	a	a	a	h	h	h	a	h	a	h	h	h	a	h	h	h	a	a	h	a	a	h	a	a	a	h	h	h	a	h	h	a	a	a	h	a	a
*scaffold56_840188C	a	h	a	-	a	h	h	a	a	a	h	a	a	a	a	h	h	h	a	a	a	h	h	h	a	h	h	h	a	a	-	a	a	h	a	a	a	-	h	h	a	h	h	a	a	a	-	a	a
*scaffold56_86297	a	h	h	h	-	h	h	h	a	a	h	-	a	a	a	h	h	h	a	h	a	h	h	h	a	h	h	h	a	a	h	a	a	h	a	a	a	h	h	h	a	h	h	a	a	a	h	a	a
*scaffold56_865437C	a	h	a	-	a	h	h	a	a	a	h	a	a	a	a	h	h	h	a	a	a	-	h	h	a	h	h	h	a	a	h	a	a	h	a	a	a	h	h	h	a	h	h	a	a	a	h	a	a
*scaffold56_898767C	a	h	a	h	a	h	h	a	a	a	h	a	a	a	a	h	-	h	a	a	a	-	h	h	a	h	h	h	a	a	-	a	a	h	a	a	a	h	h	h	a	h	h	a	a	a	h	a	a
*scaffold563_186491C	a	a	a	-	a	a	h	a	a	a	h	a	a	h	h	h	h	a	h	h	a	a	a	h	a	h	h	h	a	a	a	a	h	a	-	h	h	a	h	a	a	a	h	a	h	h	a	a	a
*scaffold565_24394C	h	h	a	a	-	a	h	h	h	a	a	a	a	a	-	h	h	a	h	-	h	a	h	h	h	a	h	h	h	-	h	a	a	a	a	a	h	a	h	h	a	a	a	h	h	h	h	a	a
*scaffold565_33667C	h	h	a	a	a	a	h	h	h	a	a	a	a	a	h	h	-	a	h	-	h	a	h	h	h	a	h	h	h	a	-	a	a	a	-	a	h	a	h	h	a	a	a	h	h	h	h	a	a
*scaffold57_1117105	h	a	a	h	a	h	a	h	h	a	a	h	h	a	a	h	h	a	h	-	a	a	a	h	a	a	h	h	h	h	-	a	h	a	h	a	h	a	h	a	h	h	a	a	h	a	h	h	a
*scaffold57_1168684C	h	a	h	-	a	h	a	h	h	a	a	h	-	a	-	h	h	a	h	a	a	a	a	h	a	a	h	h	h	h	a	a	h	a	a	a	h	a	h	a	h	h	a	-	h	a	h	h	a
*scaffold57_1207344	h	a	h	h	a	h	a	h	h	a	a	h	h	a	h	h	h	-	h	-	a	-	a	h	a	a	h	h	h	h	-	-	h	a	h	a	h	a	h	a	h	h	a	a	h	a	h	h	a
*scaffold57_1216769C	h	a	-	-	a	h	a	h	h	a	a	h	h	a	-	h	-	a	h	a	a	a	a	h	a	a	-	h	-	-	a	a	h	a	h	a	h	a	-	a	h	h	a	a	h	a	h	h	a
*scaffold57_1283659C	h	a	h	h	a	h	a	h	h	a	a	h	h	a	h	h	h	a	h	a	a	a	a	h	a	a	h	h	h	-	a	a	h	a	-	a	h	a	-	a	h	h	a	a	h	a	h	h	a
*scaffold57_1284167	h	a	h	h	a	h	a	h	h	a	a	h	h	a	h	h	h	a	h	h	a	-	a	h	a	a	h	h	h	h	a	a	h	a	h	a	h	-	h	a	h	h	a	a	h	a	h	h	a
*scaffold57_1324568C	h	a	h	h	a	h	a	h	h	a	a	h	h	a	h	h	h	a	h	a	a	a	a	h	a	a	h	h	h	h	a	a	h	a	-	a	h	a	h	a	h	h	a	a	h	a	h	h	a
*scaffold57_1324584	h	a	h	h	a	h	a	h	h	-	a	h	h	a	h	h	h	a	h	h	a	a	a	h	a	a	h	h	h	h	-	h	h	a	h	a	h	a	h	a	h	h	a	a	h	a	h	h	a
*scaffold57_1324733	h	a	h	h	a	h	a	h	h	a	a	h	h	a	h	h	h	a	h	h	a	a	a	h	a	a	h	h	h	h	-	h	h	a	h	a	h	a	h	a	h	h	a	a	h	a	h	h	a
*scaffold57_151918	h	a	-	h	-	h	a	h	h	a	a	h	h	a	a	h	h	a	h	-	a	a	a	h	a	a	h	h	h	h	a	h	h	a	a	a	h	a	h	a	h	h	a	a	h	a	h	h	a
*scaffold57_192701	h	a	a	h	a	h	a	h	h	-	a	h	h	a	a	h	h	a	h	-	a	-	a	h	a	a	h	h	h	h	-	h	h	-	a	a	h	-	h	a	h	h	a	a	h	a	h	h	a
*scaffold57_374902	h	a	a	h	-	h	a	h	a	a	a	h	h	a	-	h	h	a	h	-	a	-	a	h	a	a	h	h	h	h	a	h	h	a	a	a	h	-	h	a	h	h	a	a	h	a	h	h	a
*scaffold57_386354C	h	a	a	h	a	h	a	h	h	a	a	h	h	a	a	h	h	a	h	a	a	a	a	h	a	a	h	h	h	-	a	h	h	a	a	-	-	a	-	a	h	-	a	a	h	a	h	h	a
*scaffold57_386525C	h	a	a	h	a	h	a	h	h	a	a	h	h	a	a	h	h	a	h	a	a	a	a	h	a	a	h	h	h	h	a	h	h	a	a	a	h	a	-	a	h	h	a	a	h	a	h	h	a
*scaffold57_386534C	h	a	a	h	a	h	a	h	h	a	a	h	h	a	a	h	h	a	h	a	a	a	a	h	a	a	h	h	h	h	a	h	h	a	a	a	h	a	-	a	h	h	a	a	h	a	h	h	a
*scaffold57_394870C	h	a	a	-	a	h	a	h	h	a	a	h	h	a	a	h	-	a	h	-	a	a	a	h	a	a	h	h	h	h	a	h	h	a	a	a	h	a	h	a	h	h	a	a	h	a	h	h	a
*scaffold57_449927C	h	a	a	h	a	h	a	h	h	a	a	h	h	a	a	h	h	a	h	a	a	a	a	h	a	a	h	h	h	-	a	a	h	a	a	a	h	a	h	a	h	h	a	a	h	a	h	h	a
*scaffold57_453734C	h	a	a	h	a	h	a	h	h	a	a	h	h	a	a	h	h	a	-	a	a	a	a	h	a	a	h	h	h	h	a	a	h	a	a	a	h	a	-	a	h	h	a	a	h	a	h	h	a
*scaffold57_562590C	h	a	a	-	a	h	a	h	h	a	a	h	-	a	a	h	-	a	h	a	a	a	a	h	a	a	h	h	h	h	a	a	h	a	a	a	h	a	h	a	-	h	a	a	h	a	h	h	a
*scaffold57_719976C	h	a	-	-	a	h	a	h	h	a	a	h	-	a	a	h	h	a	h	a	a	a	a	h	a	a	h	h	h	h	a	a	h	a	a	a	h	a	-	a	h	h	a	a	h	a	-	h	a
*scaffold57_72927	h	a	-	h	a	h	a	a	h	a	a	h	h	a	a	h	h	a	h	-	a	-	a	h	a	a	h	h	h	-	a	h	-	a	a	a	h	a	h	a	h	h	a	a	h	a	h	h	a
*scaffold57_730553	h	a	-	h	a	h	a	h	h	a	a	h	h	a	-	h	h	-	h	-	a	-	a	h	a	a	h	h	h	h	a	a	h	a	a	-	h	-	h	a	h	h	a	a	h	a	h	h	a
*scaffold57_83697C	h	a	a	-	a	h	a	a	h	a	a	h	h	a	a	h	h	a	h	a	a	a	a	h	a	a	h	h	h	h	a	h	h	a	a	a	h	a	-	a	h	h	a	a	h	a	-	h	a
*scaffold57_885024	h	a	a	h	h	a	a	a	h	a	a	a	a	h	h	h	h	a	h	-	h	h	a	a	h	h	a	h	h	a	h	h	a	a	a	a	h	h	a	a	h	h	h	-	a	a	a	h	a
*scaffold57_899268C	h	a	a	h	a	h	a	h	h	a	a	h	h	a	a	h	h	a	h	a	a	a	a	h	a	a	h	h	h	h	a	a	h	a	h	a	h	a	h	a	h	h	a	a	h	a	h	h	a
*scaffold57_906878C	h	a	a	-	a	h	a	h	h	a	a	h	h	a	a	h	h	a	h	a	a	a	a	h	a	a	h	h	h	h	a	a	h	a	h	a	h	a	h	a	h	h	a	-	h	a	h	h	a
*scaffold57_906987	h	a	a	h	a	h	a	h	h	a	a	h	h	a	a	h	h	a	h	-	a	a	a	h	a	a	h	h	h	h	a	a	h	a	h	a	h	a	h	a	h	h	a	a	h	a	h	h	a
*scaffold57_972148	h	a	a	h	a	h	a	h	h	-	a	h	h	a	a	h	h	a	h	-	a	-	a	h	a	a	h	h	h	h	a	a	h	-	-	a	h	-	h	a	h	h	a	a	h	a	h	h	a
*scaffold578_104819	a	h	a	h	-	h	h	-	a	h	h	a	a	a	-	h	h	h	a	-	a	h	h	h	a	h	h	a	h	a	h	a	a	h	a	a	a	-	h	h	a	h	h	a	a	a	h	a	h
*scaffold578_135038	a	h	a	h	a	h	h	a	a	h	h	a	a	a	a	h	h	h	a	h	a	h	h	h	a	h	h	a	h	a	h	a	a	h	a	a	a	a	h	h	a	h	h	a	a	a	h	a	h
*scaffold58_140378	h	h	a	-	-	a	h	h	h	-	a	a	a	h	h	h	h	h	h	h	h	-	h	a	h	a	h	h	h	a	h	-	a	h	-	a	h	-	h	h	a	a	a	h	h	a	h	h	a
*scaffold58_140479	h	h	a	-	-	a	h	h	h	-	a	a	a	h	h	h	h	h	h	h	h	-	h	a	h	a	h	h	h	a	h	-	a	h	-	a	h	-	h	h	a	a	a	h	h	a	h	h	a
*scaffold58_686926C	h	h	a	a	a	a	h	h	h	a	a	a	a	-	h	h	-	-	h	-	h	a	h	a	h	a	-	h	h	a	h	a	a	h	a	a	h	a	-	h	a	a	a	h	h	a	h	h	a
*scaffold58_687010C	h	h	a	a	a	a	h	h	h	a	a	a	a	-	h	h	-	-	h	-	h	a	h	a	h	a	-	h	h	a	h	a	a	h	a	a	h	a	-	h	a	a	a	h	h	a	h	h	a
*scaffold58_715032	h	h	a	-	-	a	h	h	h	a	a	a	a	h	h	h	h	h	h	h	h	-	h	a	h	a	h	h	h	a	h	a	a	h	a	a	h	a	h	h	a	a	a	h	h	a	h	h	a
*scaffold58_816350	h	h	a	-	a	a	h	h	h	a	a	a	a	-	h	-	h	h	-	h	h	a	h	a	h	a	h	h	h	a	h	a	a	h	a	a	h	a	h	h	a	a	a	-	h	a	-	h	a
*scaffold58_816361	h	h	a	-	a	a	h	h	h	a	a	a	a	-	h	-	h	h	-	h	h	a	h	a	h	a	h	h	h	a	h	a	a	h	a	a	h	a	h	h	a	a	a	-	h	a	-	h	a
*scaffold58_95018C	h	h	a	a	a	a	h	h	h	a	a	a	a	-	-	h	h	h	h	-	h	a	h	a	h	a	h	h	h	a	h	a	a	h	a	a	h	a	h	h	a	a	a	h	h	a	h	h	a
*scaffold58_95019C	h	h	a	a	a	a	h	h	h	a	a	a	a	-	-	h	h	h	h	-	h	a	h	a	h	a	h	h	h	a	h	a	a	h	a	a	h	a	h	h	a	a	a	h	h	a	h	h	a
*scaffold59_1157187	a	h	a	a	-	h	h	a	a	h	a	a	a	a	a	a	a	a	h	-	a	h	h	a	a	h	a	a	a	h	a	a	h	h	a	h	h	a	a	h	h	a	h	a	a	h	h	h	a
*scaffold59_1321465	a	h	a	a	h	h	h	a	a	h	a	a	a	a	a	a	a	a	h	-	a	h	h	a	a	h	a	a	a	h	-	a	h	h	a	h	h	a	-	h	h	a	h	a	a	h	h	h	a
*scaffold59_712233C	a	h	a	a	h	h	h	a	a	h	a	a	a	a	a	a	a	a	h	a	a	h	h	a	a	h	a	h	a	h	a	a	h	h	a	h	h	a	a	h	h	a	h	a	a	h	h	h	a
*scaffold59_712361	a	h	a	a	h	h	h	a	a	h	a	a	a	a	a	a	a	a	h	-	a	h	h	a	a	h	a	h	a	h	a	a	h	h	a	h	h	a	a	h	-	a	h	a	a	h	h	-	a
*scaffold59_907295	a	h	a	-	h	h	h	a	a	h	-	a	-	a	a	a	a	-	h	-	a	h	h	a	a	h	a	h	a	h	-	a	h	h	a	h	h	a	a	h	h	-	h	a	a	h	h	h	a
*scaffold59_957892C	h	a	h	-	h	h	a	h	h	a	a	a	a	h	a	-	h	h	a	a	a	-	h	h	h	a	h	a	a	h	h	h	a	a	h	h	a	a	a	h	a	-	a	-	a	a	a	a	a
*scaffold59_957906C	a	h	a	a	h	h	h	a	a	h	a	a	a	a	a	-	a	a	h	a	a	-	h	a	a	h	a	a	a	h	a	a	h	h	a	h	h	a	a	h	h	-	h	-	a	h	h	h	a
*scaffold6_1393609	a	a	-	-	-	a	h	h	a	a	h	a	a	-	h	h	h	-	a	h	h	a	a	a	h	a	h	h	h	h	h	a	a	a	h	a	a	a	h	h	a	a	a	h	h	h	a	a	a
*scaffold6_1427914	a	a	a	-	-	a	h	h	a	-	h	a	-	a	h	h	h	-	-	h	h	-	a	a	h	a	h	h	h	h	h	a	a	a	h	a	a	-	h	h	a	a	a	h	h	h	a	a	a
*scaffold6_1427993	a	a	a	-	-	a	h	-	a	a	h	a	-	a	h	h	h	-	-	h	h	-	a	a	h	a	h	h	h	h	h	a	a	a	h	a	a	-	h	h	a	a	a	h	h	h	a	a	a
*scaffold6_442649	a	a	-	-	-	a	h	h	a	-	h	a	a	-	h	h	h	-	a	h	h	a	a	a	h	a	h	h	h	h	h	a	a	a	h	a	a	a	h	h	a	a	a	h	h	h	a	a	a
*scaffold6_461434	a	a	-	-	-	a	h	h	a	-	h	a	-	a	h	h	h	a	a	h	h	-	a	a	h	a	h	h	h	h	h	a	a	a	h	a	a	a	h	h	a	a	a	h	h	h	a	a	a
*scaffold6_461540	a	a	-	-	-	a	h	h	a	-	h	a	-	a	h	-	h	a	a	h	h	-	a	a	h	a	h	h	h	h	h	a	a	a	h	a	a	a	h	h	a	a	a	h	h	h	a	a	a
*scaffold6_461545	a	a	-	-	-	a	h	h	a	-	h	a	-	a	h	-	h	a	a	h	h	-	a	a	h	a	h	h	h	h	h	a	a	a	h	a	a	a	h	h	a	a	a	h	h	h	a	a	a
*scaffold60_550382C	a	h	h	-	-	a	a	h	h	a	h	a	a	a	-	a	a	-	a	a	h	a	h	a	a	a	-	h	h	a	-	a	h	h	a	a	a	h	-	a	a	a	h	a	a	h	a	h	h
*scaffold601_92903C	a	h	a	h	h	h	a	a	a	-	h	h	h	h	a	a	h	a	h	h	a	a	a	a	a	h	a	a	a	h	a	-	a	a	a	a	h	h	h	a	a	-	h	h	h	h	a	a	a
*scaffold61_1104246C	a	h	h	h	a	a	a	h	a	-	h	a	a	a	a	a	h	a	a	a	a	a	h	h	h	h	a	a	a	-	a	-	h	h	h	a	a	a	a	h	a	a	h	h	h	a	a	h	h
*scaffold61_321820	a	h	h	h	a	a	a	h	a	h	h	a	-	a	a	a	h	a	a	-	a	a	h	h	h	h	a	a	a	h	a	h	h	h	h	a	a	a	a	h	a	h	h	h	h	a	a	h	h
*scaffold61_390555	a	h	h	h	a	a	a	h	a	h	h	a	a	a	a	a	h	a	a	-	a	a	h	h	h	h	a	a	a	h	-	h	h	h	h	a	a	-	a	h	a	h	h	h	h	a	a	h	h
*scaffold61_448286C	a	h	h	h	a	a	a	h	a	h	h	a	a	a	a	a	-	a	a	a	a	a	h	h	h	h	a	a	a	h	a	h	h	h	h	a	a	-	a	h	a	h	h	h	h	a	a	h	h
*scaffold61_457077C	a	h	h	-	a	a	a	h	a	h	h	a	a	a	a	a	h	a	a	a	a	a	h	h	h	h	a	a	a	h	a	-	h	h	h	a	a	a	a	h	a	h	h	h	h	a	a	h	h
*scaffold61_457108C	a	h	h	-	a	a	a	h	a	h	h	a	a	a	a	a	h	a	a	a	a	a	h	h	h	h	a	a	a	h	a	-	h	h	h	a	a	a	a	h	a	h	h	h	h	a	a	h	h
*scaffold61_475327C	a	h	h	h	a	a	a	h	a	h	h	a	a	a	a	a	h	a	a	a	a	a	h	h	h	h	a	a	a	h	a	h	h	h	h	a	a	a	a	h	a	h	h	h	h	a	a	h	h
*scaffold61_541517	a	h	h	h	a	a	a	h	a	h	h	a	a	-	a	a	h	-	a	-	a	-	h	h	h	h	a	a	a	h	a	h	h	h	h	a	a	-	a	h	-	h	h	h	h	a	a	h	h
*scaffold61_581211	a	h	h	h	a	a	a	h	a	h	h	a	-	a	a	a	h	a	a	-	a	a	h	h	h	h	-	a	a	h	-	h	h	h	h	a	a	-	a	h	a	h	h	h	h	a	-	h	h
*scaffold61_595702	a	h	h	h	a	a	a	h	a	h	h	a	a	a	a	a	h	a	a	-	a	a	h	-	h	h	a	a	a	h	a	h	h	h	h	h	a	a	a	h	a	h	h	h	h	a	a	h	h
*scaffold61_800244C	a	h	h	h	a	a	a	h	a	h	h	a	a	a	a	a	h	a	a	a	a	a	h	h	h	h	a	a	a	h	a	h	h	h	h	a	a	a	a	h	a	a	h	h	h	a	a	h	h
*scaffold61_800421C	a	h	-	-	a	a	a	-	a	h	-	a	a	a	a	a	-	a	a	a	a	a	h	h	h	h	a	a	a	h	a	h	h	h	h	a	a	a	a	h	a	a	h	h	h	a	a	h	h
*scaffold612_32852	a	h	h	-	a	a	h	a	h	a	a	a	-	a	-	h	a	h	a	h	h	h	a	h	h	h	h	h	-	h	h	a	h	h	h	-	a	a	a	a	a	a	h	h	h	a	a	a	h
*scaffold612_48170C	a	h	-	-	a	a	h	a	h	a	a	a	a	a	a	h	a	-	a	-	h	-	a	h	h	h	h	h	h	-	h	a	h	h	h	h	a	a	a	a	a	a	h	h	h	a	a	a	h
*scaffold62_1213511	h	a	a	h	a	a	h	h	a	h	h	a	a	a	a	a	-	h	h	a	a	a	h	h	h	h	h	a	h	h	a	h	a	h	h	a	h	a	a	h	a	h	-	h	a	a	h	h	a
*scaffold62_1213594	h	a	a	a	a	a	h	a	a	h	h	a	a	a	a	a	a	a	h	a	a	a	h	h	h	h	h	a	h	h	a	h	a	h	h	a	h	a	a	h	a	h	h	h	a	a	h	h	a
*scaffold62_644682C	h	a	a	-	a	a	h	h	a	h	h	a	a	a	a	a	h	h	h	a	a	a	h	h	h	h	h	a	h	h	a	h	a	h	-	a	h	a	a	h	a	h	h	h	a	a	h	h	a
*scaffold62_644719C	h	a	-	-	a	a	h	h	a	-	h	a	a	a	a	a	h	h	h	a	a	a	h	h	h	h	h	a	h	h	a	h	a	h	h	a	h	a	a	h	a	h	h	h	a	a	h	h	a
*scaffold62_644806C	h	a	a	-	a	a	h	h	a	h	h	a	a	a	a	a	h	h	h	a	a	a	h	h	h	h	h	a	h	h	a	h	a	h	h	a	h	a	a	h	a	h	h	h	a	a	h	h	a
*scaffold63_1108274C	a	h	a	a	a	a	h	h	a	a	a	a	a	a	h	h	h	-	-	h	h	a	h	h	h	a	h	h	h	a	h	-	a	a	a	a	h	a	h	h	a	a	-	h	h	h	h	a	a
*scaffold63_1131182C	a	h	a	a	a	a	h	-	a	a	a	a	a	a	-	h	-	a	h	-	h	a	h	h	h	a	h	h	h	a	-	a	a	a	a	a	h	a	h	h	a	a	a	h	h	h	h	a	a
*scaffold63_1279039	a	h	-	-	-	a	h	h	a	-	a	a	a	a	h	h	h	-	h	h	h	-	h	h	h	a	h	h	h	a	h	a	a	a	a	a	h	a	h	h	a	a	a	h	h	h	h	a	a
*scaffold63_1279109	a	h	-	-	-	a	h	h	a	a	a	a	a	a	h	h	h	-	h	h	h	-	h	h	h	a	h	h	h	a	h	a	a	a	a	a	h	a	h	h	a	a	a	h	h	h	h	a	a
*scaffold63_1332425	a	h	a	a	a	a	h	h	a	a	a	a	a	a	h	h	h	a	h	h	h	a	h	h	h	a	h	h	h	a	h	a	a	a	a	a	h	a	h	h	a	a	a	h	h	h	h	a	a
*scaffold63_1332427C	h	a	-	a	a	a	a	a	h	h	a	a	a	a	-	a	a	a	-	-	a	a	a	a	a	a	h	h	h	h	-	-	a	h	h	h	h	a	h	a	a	h	h	h	h	h	a	h	h
*scaffold63_1332436C	h	a	h	a	a	a	a	a	h	h	a	a	a	a	-	a	a	a	h	-	a	a	a	a	a	a	h	h	h	h	-	a	a	h	h	h	h	a	h	a	a	h	-	h	h	h	a	-	h
*scaffold63_1382277	a	h	a	a	a	a	h	h	a	a	a	a	a	a	h	h	h	a	h	h	h	a	h	h	h	a	h	h	h	a	h	-	a	a	a	a	h	a	h	h	a	a	a	h	h	h	h	a	a
*scaffold63_1382298	a	h	a	a	a	a	h	h	a	a	a	a	a	a	h	h	h	-	h	h	h	a	h	h	h	a	h	h	h	a	h	-	a	a	a	a	h	a	h	h	a	a	a	h	h	h	h	a	a
*scaffold63_277595C	h	h	a	a	a	a	h	h	a	a	a	a	a	a	h	h	h	a	h	-	h	a	h	h	h	a	h	h	h	a	h	a	a	a	a	a	h	a	h	h	a	a	a	h	h	h	h	a	a
*scaffold63_377184	h	h	a	a	a	a	h	h	a	a	a	a	a	a	h	h	h	a	h	h	h	a	h	h	h	a	h	h	h	a	h	a	a	a	a	a	h	-	h	h	a	a	a	h	h	h	h	a	a
*scaffold63_377301C	h	h	a	a	a	-	h	h	a	a	a	a	a	a	h	h	h	-	h	-	h	a	h	h	h	a	h	h	h	a	h	a	a	a	a	a	h	a	h	h	-	a	a	h	h	h	h	a	-
*scaffold63_390473	h	h	a	a	a	a	h	h	a	a	a	a	a	a	h	h	h	a	h	h	h	-	h	h	h	a	h	h	h	a	h	a	a	a	a	a	h	a	h	h	a	a	a	h	h	h	h	a	a
*scaffold63_613074C	-	h	a	a	a	a	-	h	a	a	a	a	a	a	-	h	-	a	h	a	h	a	h	h	h	a	-	h	h	a	-	a	a	a	a	a	h	a	h	h	a	a	a	h	h	h	h	a	a
*scaffold63_616859	h	h	a	a	a	a	h	h	a	a	a	a	a	a	h	h	-	-	h	h	h	a	h	h	h	a	h	h	-	a	h	a	a	a	a	a	-	a	h	h	a	a	a	h	h	h	h	a	a
*scaffold63_721208C	h	h	a	a	a	a	h	h	a	a	a	a	a	a	h	h	h	a	h	-	h	a	h	h	h	a	h	h	h	a	-	a	a	a	a	a	h	a	-	h	a	a	a	h	h	h	h	a	a
*scaffold63_721221	h	h	a	-	a	a	h	h	a	a	a	a	a	-	h	h	h	a	h	h	h	-	h	h	h	a	h	h	h	-	h	a	a	a	a	a	h	-	h	h	a	a	a	h	h	h	h	a	a
*scaffold63_725177C	h	h	a	a	a	a	h	h	a	a	a	a	a	a	-	h	h	a	h	h	h	a	h	h	h	a	h	h	h	a	-	a	a	a	a	a	h	a	-	h	a	a	a	h	h	h	h	a	a
*scaffold63_859996C	h	h	a	a	a	a	h	h	a	a	a	a	a	a	-	h	-	a	h	-	h	a	-	h	h	a	h	h	h	a	-	a	a	a	a	a	h	a	h	h	a	a	a	h	h	h	h	a	a
*scaffold63_860000C	h	h	a	a	a	a	h	h	a	a	a	a	a	a	-	h	-	a	h	-	h	a	-	h	h	a	h	h	h	a	-	a	a	a	a	a	h	a	h	h	a	a	a	h	h	h	h	a	a
*scaffold631_62945C	h	a	-	-	-	h	a	h	a	a	a	h	h	a	h	a	-	h	h	a	h	a	-	h	a	h	h	a	a	h	a	a	h	h	h	a	h	a	-	a	h	a	a	a	h	a	h	h	a
*scaffold631_77622	h	a	h	h	h	h	a	h	a	a	a	h	h	a	h	a	h	h	h	-	h	a	h	h	a	h	h	a	a	h	-	a	h	h	h	a	h	-	h	a	h	a	a	a	h	a	h	h	a
*scaffold631_77715	h	a	h	h	h	h	a	h	a	a	a	h	h	a	h	a	h	h	h	-	h	a	h	h	a	h	h	a	a	h	-	a	-	h	h	a	h	-	h	a	h	a	a	a	h	a	h	h	a
*scaffold631_77750	h	a	h	h	h	h	a	h	a	a	a	h	h	a	h	a	h	h	h	-	h	a	h	h	a	h	h	a	a	h	-	a	-	h	h	a	h	-	h	a	h	a	a	a	h	a	h	h	a
*scaffold636_32250	a	h	h	a	a	a	h	a	h	a	a	a	a	a	a	h	a	h	a	h	h	h	a	h	h	h	h	h	a	h	h	a	h	h	h	h	a	a	a	a	a	a	h	h	h	a	a	-	h
*scaffold636_32259C	a	h	h	a	a	a	h	a	h	a	a	a	a	a	a	h	a	h	a	-	h	-	a	h	h	h	h	h	a	h	-	a	h	h	h	h	a	a	a	a	a	a	h	h	h	a	a	a	h
*scaffold636_96087C	a	h	h	a	a	a	h	a	h	a	-	a	a	a	a	h	a	h	a	h	h	h	a	h	h	h	h	h	a	h	-	a	h	h	h	-	a	-	a	a	-	a	h	h	h	a	a	a	h
*scaffold636_96100C	a	h	h	a	a	a	h	a	h	a	-	a	a	a	a	h	a	h	a	h	h	h	a	h	h	h	h	h	a	h	-	a	h	h	h	-	a	-	a	a	-	a	h	h	h	a	a	a	h
*scaffold64_350592C	a	a	a	h	a	a	h	-	-	a	h	a	a	h	a	h	h	a	h	-	a	a	a	a	a	h	h	h	a	a	a	a	h	a	h	h	h	a	h	h	a	h	h	a	h	h	a	a	a
*scaffold64_350593C	a	a	a	h	a	a	h	-	-	a	h	a	a	h	a	h	h	a	h	-	a	a	a	a	a	h	h	h	a	a	a	a	h	a	h	h	h	a	h	h	a	h	h	a	h	h	a	a	a
*scaffold64_415386	a	a	a	h	a	a	h	a	a	-	h	a	a	h	a	h	h	a	h	h	a	a	a	a	a	h	h	h	a	a	-	a	h	a	h	h	h	a	h	h	a	h	h	a	h	h	a	a	a
*scaffold64_415409C	a	a	a	h	a	a	h	a	a	a	h	a	a	-	a	h	h	a	h	a	a	a	a	a	a	h	h	h	a	a	a	a	h	a	-	h	h	a	-	h	a	h	h	a	h	h	a	a	a
*scaffold64_524324C	a	a	a	h	a	a	h	a	-	a	h	a	a	h	a	h	h	a	h	a	a	a	a	a	a	h	h	h	a	a	a	a	h	a	h	h	h	a	h	h	a	h	h	a	h	h	a	a	a
*scaffold64_765980C	a	h	a	-	h	h	a	a	a	h	h	h	h	h	a	-	h	a	h	-	a	h	a	a	a	h	a	a	-	h	a	h	a	a	a	-	h	h	-	a	a	-	h	h	h	h	a	a	a
*scaffold645_69171	a	a	-	-	-	a	h	a	a	a	a	a	-	-	h	a	a	-	a	-	h	-	h	h	a	a	h	h	a	h	-	h	a	a	h	a	a	h	a	h	h	a	a	a	h	h	h	a	a
[truncated: 1,980 more rows]
[truncated: 60 more columns]
